# Supplementary material for: EZH2-TTP-mTORC1 Axis Drives Phenotypic Plasticity and Therapeutic Vulnerability in Lethal Prostate Cancer
Source: Research Square preprint supplement (doi:10.21203/rs.3.rs-7360528/v1), 2025-08-21
Supplement: Supplementary file 1 [file 025935191ee189c68a0cc582.xlsx]

## Sheet: Table S1
Supplement Table 1:snRNAseq EPZ vs vehicle - clusters - GSEA
	grp	pathway	pval	padj	log2err	ES	NES	size	leadingEdge
0	0_v_1	HALLMARK_ANDROGEN_RESPONSE	0.0256883	0.036754064514210205	0.01261	0.646498	1.24895	95	c("Ell2", "Bmpr1b", "Stk39", "Sec24d", "Lifr", "Ank", "Cdk6", "Arid5b", "Sord", "Sgk1", "Rab4a", "Pdlim5", "Hpgd", "Iqgap2", "Pias1", "Lman1", "Map7", "Tpd52", "Slc38a2", "Homer2", "Camkk2", "Zmiz1", "Uap1", "Xrcc5", "Elovl5", "Rps6ka3", "Appbp2", "Ptpn21", "Ngly1", "Xrcc6", "Fkbp5", "Zbtb10", "Vapa", "Abhd2", "Herc3", "B4galt1", "Gnai3", "Ccnd3", "Ccnd1", "Slc26a2", "Ube2j1", "Fads1", "Spdef", "…
1	0_v_1	HALLMARK_EPITHELIAL_MESENCHYMAL_TRANSITION	0.0144766	0.0236198	0.38073	-0.354477	-1.1731	193	c("Sat1", "Cd44", "Vegfa", "Ntm", "Anpep", "Cxcl5", "Flna", "Pdlim4", "Dst", "Col7a1", "Gadd45a", "Sdc4", "Cxcl15", "Lamc2", "Mcm7", "Lrp1", "Itga2", "Pmepa1", "Jun", "Thbs1", "Sdc1", "Col1a2", "Col16a1", "Mgp", "Fn1", "Tgfbi", "Col1a1", "Qsox1", "Ccn2", "Bmp1", "Col6a3", "Areg", "Tnfrsf12a", "Spp1", "Tnfaip3", "Col5a2", "Ecm1", "Tpm2", "Tnfrsf11b", "Wipf1", "Tpm1", "Tagln", "Tgm2", "Vim", "Col3a…
2	0_v_1	HALLMARK_INTERFERON_ALPHA_RESPONSE	1.85623767769539e-06	1.3279238771205484e-05	0.643552	-0.631479	-1.9283	92	c("Ifi27", "Txnip", "Ddx60", "Trafd1", "Uba7", "Rsad2", "Helz2", "Tap1", "Ifi44", "Irf7", "Parp14", "Rtp4", "Parp12", "Irf9", "Isg15", "Irf1", "Dhx58", "Trim21", "Herc6", "Bst2", "Cmpk2", "Trim25", "Gbp3", "Psmb8", "Usp18", "Ogfr", "Ifit3", "Sp110", "Plscr1", "Oasl1", "B2m", "Cd74", "C1s1", "Stat2", "Psme1", "Psmb9", "Ifih1", "Ifitm1", "Lgals3bp", "Ifitm3", "Batf2", "Wars", "Cxcl10", "Isg20", "If…
3	0_v_1	HALLMARK_INTERFERON_GAMMA_RESPONSE	3.13180507759e-07	3.640723402698375e-06	0.674963	-0.524497	-1.72725	185	c("Oas2", "Ifi27", "Txnip", "Rnf213", "Ddx60", "Trafd1", "Rbck1", "Rsad2", "Helz2", "Tapbp", "Tap1", "Sectm1a", "Ifi44", "Btg1", "Irf7", "Parp14", "Rtp4", "Parp12", "Irf9", "Nfkbia", "Isg15", "Irf1", "Dhx58", "Stat1", "Icam1", "Trim21", "Herc6", "Bst2", "Zbp1", "Cmpk2", "Cd274", "Trim25", "Casp4", "Oas3", "Gbp3", "Psmb8", "Usp18", "Ogfr", "Ifit3", "Sp110", "Plscr1", "Xaf1", "Ido1", "Tnfaip2", "Pf…
4	0_v_1	HALLMARK_PI3K_AKT_MTOR_SIGNALING	0.0491824	0.0635272	0.00899428	0.624643	1.21019	105	c("Plcb1", "Mapkap1", "Cab39l", "Rptor", "Gsk3b", "Nck1", "Acaca", "Mapk1", "Pik3r3", "Mapk8", "Cab39", "Smad2", "Map2k6", "Raf1", "Rps6ka3", "Pikfyve", "Grb2", "Mapk10", "Ube2d3", "Them4", "Eif4e", "Atf1", "Tbk1", "Pten", "Ptpn11", "Cltc", "Actr2", "Ube2n", "Ecsit", "Nod1", "Ppp2r1b", "Map3k7", "Slc2a1", "Actr3", "Prkar2a", "Ywhab", "Dusp3", "Ralb", "Tiam1", "Ripk1", "Prkaa2", "Cdkn1b", "Itpr2",…
5	1_vs_0	HALLMARK_PI3K_AKT_MTOR_SIGNALING	0.0490074	0.0635272	0.00901133	-0.624643	-1.21044	105	c("Plcb1", "Mapkap1", "Cab39l", "Rptor", "Gsk3b", "Nck1", "Acaca", "Mapk1", "Pik3r3", "Mapk8", "Cab39", "Smad2", "Map2k6", "Raf1", "Rps6ka3", "Pikfyve", "Grb2", "Mapk10", "Ube2d3", "Them4", "Eif4e", "Atf1", "Tbk1", "Pten", "Ptpn11", "Cltc", "Actr2", "Ube2n", "Ecsit", "Nod1", "Ppp2r1b", "Map3k7", "Slc2a1", "Actr3", "Prkar2a", "Ywhab", "Dusp3", "Ralb", "Tiam1", "Ripk1", "Prkaa2", "Cdkn1b", "Itpr2",…
6	1_vs_0	HALLMARK_INTERFERON_GAMMA_RESPONSE	2.66497549197911e-07	3.640723402698375e-06	0.674963	0.524497	1.71003	185	c("Oas2", "Ifi27", "Txnip", "Rnf213", "Ddx60", "Trafd1", "Rbck1", "Rsad2", "Helz2", "Tapbp", "Tap1", "Sectm1a", "Ifi44", "Btg1", "Irf7", "Parp14", "Rtp4", "Parp12", "Irf9", "Nfkbia", "Isg15", "Irf1", "Dhx58", "Stat1", "Icam1", "Trim21", "Herc6", "Bst2", "Zbp1", "Cmpk2", "Cd274", "Trim25", "Casp4", "Oas3", "Gbp3", "Psmb8", "Usp18", "Ogfr", "Ifit3", "Sp110", "Plscr1", "Xaf1", "Ido1", "Tnfaip2", "Pf…
7	1_vs_0	HALLMARK_INTERFERON_ALPHA_RESPONSE	1.42200725555055e-06	1.1020556230516763e-05	0.643552	0.631479	1.92983	92	c("Ifi27", "Txnip", "Ddx60", "Trafd1", "Uba7", "Rsad2", "Helz2", "Tap1", "Ifi44", "Irf7", "Parp14", "Rtp4", "Parp12", "Irf9", "Isg15", "Irf1", "Dhx58", "Trim21", "Herc6", "Bst2", "Cmpk2", "Trim25", "Gbp3", "Psmb8", "Usp18", "Ogfr", "Ifit3", "Sp110", "Plscr1", "Oasl1", "B2m", "Cd74", "C1s1", "Stat2", "Psme1", "Psmb9", "Ifih1", "Ifitm1", "Lgals3bp", "Ifitm3", "Batf2", "Wars", "Cxcl10", "Isg20", "If…
8	1_vs_0	HALLMARK_ANDROGEN_RESPONSE	0.0246738	0.0358541	0.0128739	-0.646498	-1.24931	95	c("Ell2", "Bmpr1b", "Stk39", "Sec24d", "Lifr", "Ank", "Cdk6", "Arid5b", "Sord", "Sgk1", "Rab4a", "Pdlim5", "Hpgd", "Iqgap2", "Pias1", "Lman1", "Map7", "Tpd52", "Slc38a2", "Homer2", "Camkk2", "Zmiz1", "Uap1", "Xrcc5", "Elovl5", "Rps6ka3", "Appbp2", "Ptpn21", "Ngly1", "Xrcc6", "Fkbp5", "Zbtb10", "Vapa", "Abhd2", "Herc3", "B4galt1", "Gnai3", "Ccnd3", "Ccnd1", "Slc26a2", "Ube2j1", "Fads1", "Spdef", "…
9	1_vs_0	HALLMARK_EPITHELIAL_MESENCHYMAL_TRANSITION	0.0508135	0.0647351	0.321776	0.354477	1.16662	193	c("Sat1", "Cd44", "Vegfa", "Ntm", "Anpep", "Cxcl5", "Flna", "Pdlim4", "Dst", "Col7a1", "Gadd45a", "Sdc4", "Cxcl15", "Lamc2", "Mcm7", "Lrp1", "Itga2", "Pmepa1", "Jun", "Thbs1", "Sdc1", "Col1a2", "Col16a1", "Mgp", "Fn1", "Tgfbi", "Col1a1", "Qsox1", "Ccn2", "Bmp1", "Col6a3", "Areg", "Tnfrsf12a", "Spp1", "Tnfaip3", "Col5a2", "Ecm1", "Tpm2", "Tnfrsf11b", "Wipf1", "Tpm1", "Tagln", "Tgm2", "Vim", "Col3a…
10	1_vs_2	HALLMARK_EPITHELIAL_MESENCHYMAL_TRANSITION	0.00251905	0.00557791	0.431708	0.393921	1.30243	193	c("Sat1", "Vegfa", "Ntm", "Flna", "Cxcl5", "Qsox1", "Gadd45a", "Lrp1", "Col7a1", "Cxcl15", "Cd44", "Mcm7", "Col16a1", "Rhob", "Col1a1", "Tgfbi", "Jun", "Col1a2", "Dab2", "Ccn2", "Col6a3", "Mgp", "Bmp1", "Ecm1", "Tagln", "Pdlim4", "Areg", "Tnc", "Wipf1", "Tnfrsf11b", "Fn1", "Col3a1", "Col5a2", "Cdh6", "Tpm2", "Postn", "Fbln2", "Vcam1", "Id2", "Lama2", "Igfbp4", "Tpm1", "Anpep", "Serpine1", "Plod2"…
11	1_vs_2	HALLMARK_INTERFERON_GAMMA_RESPONSE	0.000154734	0.000654102	0.518848	0.446525	1.46946	185	c("Oas2", "Ifi27", "Rbck1", "Txnip", "Rsad2", "Helz2", "Sectm1a", "Ddx60", "Trafd1", "Tap1", "Tapbp", "B2m", "Irf9", "Irf7", "Rtp4", "Ifi44", "Icam1", "Isg15", "Trim21", "Dhx58", "Parp12", "Ogfr", "Nfkbia", "Bst2", "Cd274", "Cmpk2", "Gbp3", "Irf1", "Ido1", "Rnf213", "C1s1", "Stat1", "Il10ra", "Oas3", "Tnfaip2", "Zbp1", "Irf5", "Pfkp", "Oasl1", "Psmb8", "Ifit3", "Socs3", "Lcp2", "Batf2", "Btg1", "…
12	1_vs_2	HALLMARK_PI3K_AKT_MTOR_SIGNALING	0.0160137	0.0252419	0.0160498	-0.630946	-1.26118	105	c("Plcb1", "Mapk1", "Gsk3b", "Rptor", "Pten", "Acaca", "Cab39l", "Nck1", "Mapkap1", "Cltc", "Rps6ka3", "Ube2d3", "Pikfyve", "Cab39", "Egfr", "Smad2", "Mapk8", "Raf1", "Gna14", "Grb2", "Ube2n", "Eif4e", "Rps6ka1", "Ripk1", "Actr2", "Atf1", "Prkar2a", "Map2k6", "Ptpn11", "Prkaa2", "Actr3", "Ecsit", "Irak4", "Rac1", "Pik3r3", "Tbk1", "Map3k7", "Ywhab", "Ppp2r1b", "Itpr2", "Prkag1", "Them4", "Dusp3",…
13	1_vs_2	HALLMARK_INTERFERON_ALPHA_RESPONSE	0.000242481	0.000860118	0.518848	0.519007	1.5863	92	c("Ifi27", "Uba7", "Txnip", "Rsad2", "Helz2", "Ddx60", "Trafd1", "Tap1", "B2m", "Irf9", "Irf7", "Rtp4", "Ifi44", "Isg15", "Trim21", "Dhx58", "Parp12", "Ogfr", "Bst2", "Cmpk2", "Gbp3", "Irf1", "C1s1", "Oasl1", "Ifitm1", "Psmb8", "Ifit3", "Batf2", "Lpar6", "Trim25", "Cd74", "Samd9l", "Cxcl10", "Ifit2", "Herc6", "Usp18", "Parp9", "Psmb9", "Ube2l6", "Nub1", "Sell", "Parp14")
14	1_vs_2	HALLMARK_ANDROGEN_RESPONSE	0.000185696	0.000719571	0.150807	-0.70182	-1.39805	95	c("Bmpr1b", "Arid5b", "Stk39", "Iqgap2", "Sec24d", "Pdlim5", "Homer2", "Map7", "Fkbp5", "Pias1", "Ank", "Ell2", "Zmiz1", "Mertk", "Tpd52", "Ccnd3", "Rps6ka3", "Hpgd", "Cdk6", "Abcc4", "Appbp2", "B4galt1", "Zbtb10", "Abhd2", "Rab4a", "Lifr", "Ptpn21", "Xrcc6", "Vapa", "Lman1", "Xrcc5", "Sord", "Elovl5", "Slc38a2", "Plpp1", "Herc3", "Pgm3", "Ngly1", "Ptk2b", "Spdef", "Ncoa4", "Itgav", "Actn1", "Cdc…
15	1_vs_3	HALLMARK_ANDROGEN_RESPONSE	0.0232662	0.034556355860699176	0.0133635	-0.629548	-1.28687	95	c("Abcc4", "Cdk6", "Map7", "Rps6ka3", "Stk39", "Pdlim5", "Zmiz1", "Tnfaip8", "Arid5b", "Ccnd3", "B4galt1", "Pias1", "Appbp2", "Itgav", "Sec24d", "Tpd52", "Iqgap2", "Krt19", "Ell2", "Tmprss2", "Ank", "Xrcc6", "Homer2", "Gsr", "Krt8", "Fkbp5", "Vapa", "Acsl3", "Elk4", "Elovl5", "Rab4a", "Slc38a2", "Xrcc5", "Ptpn21", "Pmepa1", "Steap4", "Selenop", "Ube2j1", "Plpp1", "Herc3", "Aldh1a3", "Gnai3", "Ada…
16	1_vs_3	HALLMARK_EPITHELIAL_MESENCHYMAL_TRANSITION	0.99841	0.99841	0.00013075	-0.292617	-0.61163	193	c("Cadm1", "Notch2", "Il15", "Itga2", "Cd44", "Sntb1", "Lamc1", "Itgav", "Tpm1", "Cxcl15", "Basp1", "Itgb1", "Mmp14", "Lamc2", "Pmepa1", "Ppib", "Thbs1", "Colgalt1", "Tgfbr3", "Itgb5", "Lama3", "Fuca1", "Slc6a8", "Vegfc", "Qsox1", "Cxcl5", "Cap2", "Sdc1", "Pvr", "Dst", "Sdc4", "Spock1", "Gja1", "Plod2", "Jun", "Tpm4", "Slit2", "Tgm2", "Plaur", "Itga5")
17	1_vs_3	HALLMARK_INTERFERON_ALPHA_RESPONSE	0.222609	0.2360739909971999	0.00386821	-0.554261	-1.13123	92	c("Ly6e", "Irf2", "Elf1", "Epsti1", "Eif2ak2", "Plscr1", "Il15", "Herc6", "Ifitm3", "Ifih1", "Psma3", "Cd47", "Parp14", "Stat2", "Lgals3bp", "Usp18", "Ripk2", "Tdrd7", "Nmi", "Rnf31", "Mov10", "Trim12c", "Parp9", "Oas1a", "Psme2", "Casp8", "Gmpr", "Sp110", "Ddx60", "Il7", "Samd9l", "Oasl1", "Casp1", "Pnpt1", "Tmem140", "Ifi44", "Ifit2", "Adar", "Ifitm2", "Psme1", "Isg20", "Ifit3", "Csf1", "Psmb9"…
18	1_vs_3	HALLMARK_INTERFERON_GAMMA_RESPONSE	0.218883	0.2360739909971999	0.00386149	-0.527666	-1.10191	185	c("Nfkb1", "Ly6e", "Irf2", "Rapgef6", "Epsti1", "Tnfsf10", "Eif2ak2", "Arid5b", "Pla2g4a", "Sppl2a", "Plscr1", "Il15", "Peli1", "Auts2", "Rnf213", "Stat3", "Herc6", "Stat1", "Ifitm3", "Ifih1", "Psma3", "Cfh", "Parp14", "Stat2", "Ptpn1", "Lgals3bp", "Usp18", "Ripk2", "Tdrd7", "Jak2", "Nlrc5", "Nmi", "Rnf31", "Ncoa3", "Ddx58", "Hif1a", "Oas3", "Xaf1", "Ptpn2", "Psme2", "Btg1", "Ripk1", "Casp4", "La…
19	1_vs_3	HALLMARK_PI3K_AKT_MTOR_SIGNALING	0.00638188	0.0122609	0.0256753	-0.648587	-1.33167	105	c("Egfr", "Gsk3b", "Rps6ka3", "Itpr2", "Pten", "Pik3r3", "Gna14", "Mapk1", "Cab39", "Smad2", "Mapkap1", "Rptor", "Cltc", "Ube2d3", "Pikfyve", "Prkaa2", "Cab39l", "Actr2", "Acaca", "Raf1", "Stat2", "Grb2", "Dapp1", "Actr3", "Mapk8", "Nck1", "Vav3", "Irak4", "Ripk1", "Rps6ka1", "Ube2n", "Ptpn11", "Eif4e", "Map3k7", "Atf1", "Prkar2a", "Tiam1", "Map2k6", "Plcb1", "Ecsit", "Cdkn1a", "Mapk9", "Rac1", "…
20	1_vs_4	HALLMARK_ANDROGEN_RESPONSE	0.0287566	0.0399159	0.0119966	-0.618935	-1.28083	95	c("Abcc4", "Arid5b", "Pdlim5", "Stk39", "Rps6ka3", "Tnfaip8", "Map7", "Zmiz1", "Cdk6", "B4galt1", "Ccnd3", "Tmprss2", "Krt19", "Sec24d", "Pias1", "Pmepa1", "Tpd52", "Homer2", "Appbp2", "Iqgap2", "Xrcc6", "Acsl3", "Itgav", "Ell2", "Vapa", "Xrcc5", "Gsr", "Krt8", "Elovl5", "Rab4a", "Herc3", "Elk4", "Slc38a2", "Ptpn21", "Selenop", "Mertk", "Actn1", "Cdc14b", "Plpp1", "Ank", "Ube2j1", "Abhd2", "Steap…
21	1_vs_4	HALLMARK_EPITHELIAL_MESENCHYMAL_TRANSITION	0.989765	0.99841	0.000234574	-0.321301	-0.680775	193	c("Cadm1", "Itga2", "Notch2", "Basp1", "Cd44", "Sntb1", "Pmepa1", "Thbs1", "Itgav", "Lamc1", "Cxcl15", "Qsox1", "Itgb1", "Cap2", "Mmp14", "Tpm1", "Il15", "Cdh2", "Fuca1", "Dst", "Jun", "Wnt5a", "Lamc2", "Lama3", "Colgalt1")
22	1_vs_4	HALLMARK_INTERFERON_ALPHA_RESPONSE	0.10998	0.12947009514796062	0.0396941	0.389098	1.16868	92	c("Ifi27", "Uba7", "Rsad2", "Trafd1", "B2m", "Helz2", "Txnip", "Tap1", "Irf9", "Trim21", "Rtp4", "Isg15", "Irf7", "Dhx58", "Cmpk2", "Gbp3", "C1s1", "Bst2", "Ifi44", "Parp12", "Ogfr", "Batf2", "Ifitm1", "Ifit3", "Wars", "Trim25", "Ddx60", "Cxcl10", "Lap3")
23	1_vs_4	HALLMARK_INTERFERON_GAMMA_RESPONSE	0.122054	0.1401365111334905	0.101613	0.340702	1.10513	185	c("Oas2", "Ifi27", "Rbck1", "Sectm1a", "Rsad2", "Trafd1", "B2m", "Helz2", "Txnip", "Tap1", "Irf9", "Trim21", "Rtp4", "Isg15", "Irf7", "Cd274", "Apol6", "Dhx58", "Ido1", "Pim1", "Cmpk2", "Gbp3", "Tapbp", "C1s1", "Bst2", "Il10ra", "Ifi44", "Parp12", "Irf5", "Ogfr", "Socs3", "Fas", "Socs1", "Batf2", "Pnp", "Lcp2", "Ifit3", "Tor1b", "Wars", "Pde4b", "Tnfaip2", "Ptpn6", "Mthfd2", "Nfkbia", "Trim25", "…
24	1_vs_4	HALLMARK_PI3K_AKT_MTOR_SIGNALING	0.0116631	0.019369070117640524	0.0189552	-0.631798	-1.31349	105	c("Rps6ka3", "Gsk3b", "Pik3r3", "Itpr2", "Gna14", "Pten", "Egfr", "Plcb1", "Cab39", "Mapk1", "Rptor", "Smad2", "Cab39l", "Mapkap1", "Pikfyve", "Cltc", "Acaca", "Actr3", "Ube2d3", "Map2k6", "Raf1", "Actr2", "Grb2", "Dapp1", "Mapk8", "Nck1", "Prkaa2", "Mapk9", "Irak4", "Ripk1", "Eif4e", "Rps6ka1", "Ube2n", "Ptpn11", "Vav3", "Map3k7", "Atf1", "Prkar2a", "Ywhab", "Prkag1", "Rac1", "Stat2", "Tbk1", "E…
25	1_vs_5	HALLMARK_PI3K_AKT_MTOR_SIGNALING	0.165825	0.1846221138689889	0.00574528	-0.424126	-1.17688	105	c("Plcb1", "Mapkap1", "Cab39l", "Acaca", "Rptor", "Gsk3b", "Map2k6", "Pik3r3", "Nck1", "Mapk1", "Ywhab", "Atf1", "Them4", "Dusp3", "Mapk10", "Ptpn11", "Smad2", "Rps6ka3", "Pikfyve", "Ppp2r1b", "Itpr2", "Ecsit", "Ripk1", "Cfl1", "Cab39", "Raf1", "Grb2", "Prkar2a", "Nod1", "Mapk8", "Eif4e", "Cltc", "Tiam1", "Map3k7", "Pla2g12a", "Prkag1", "Actr2", "Ngf", "Pten", "Ralb", "Rps6ka1", "Pin1", "Akt1", "…
26	1_vs_5	HALLMARK_ANDROGEN_RESPONSE	0.0068326	0.012459449372721155	0.030135	-0.548271	-1.50131	95	c("Bmpr1b", "Ell2", "Lifr", "Stk39", "Arid5b", "Sec24d", "Sgk1", "Ank", "Hpgd", "Cdk6", "Sord", "Lman1", "Rab4a", "Iqgap2", "Zmiz1", "Pias1", "Uap1", "Homer2", "Camkk2", "Krt8", "Ptpn21", "Elovl5", "Pdlim5", "Map7", "Xrcc5", "Tpd52", "Ccnd3", "Rps6ka3", "Ccnd1", "Zbtb10", "B4galt1", "Selenop", "Slc26a2", "Pa2g4")
27	1_vs_5	HALLMARK_EPITHELIAL_MESENCHYMAL_TRANSITION	0.0050399	0.010251640010349934	0.0549444	0.434321	1.4081	193	c("Sat1", "Vegfa", "Gadd45a", "Flna", "Anpep", "Pdlim4", "Qsox1", "Sdc4", "Mcm7", "Ntm", "Cd44", "Lrp1", "Col16a1", "Col7a1", "Dst", "Lamc2", "Cxcl5", "Copa", "Tnfrsf11b", "Fas", "Bmp1", "Thy1", "Pvr", "Col1a1", "Fgf2", "Rhob", "Serpine1", "Tnfaip3", "Comp", "Tgfbi", "Sgcb", "Fbln2", "Tpm1", "Cxcl15", "Gpc1", "Sdc1", "Igfbp2", "Lox", "Prrx1", "Tnfrsf12a", "Jun", "Dpysl3", "Id2", "Eno2", "Foxc2", …
28	1_vs_5	HALLMARK_INTERFERON_ALPHA_RESPONSE	9.30488131364264e-07	7.866854201534232e-06	0.659444	0.68533	2.01916	92	c("Ifi27", "Trafd1", "Txnip", "Uba7", "Ddx60", "Helz2", "Tap1", "Rtp4", "Ifi44", "Irf9", "Rsad2", "Dhx58", "Parp12", "Trim21", "Parp14", "Gbp3", "C1s1", "Irf1", "Batf2", "Herc6", "Irf7", "Bst2", "Usp18", "Trim25", "Ogfr", "Cmpk2", "Isg15", "Sp110", "Nub1", "Psmb9", "Adar", "Wars", "Ifi35", "Ifitm1", "Lpar6", "Psmb8", "Lap3", "Mvb12a", "Oas1a", "Pnpt1", "Plscr1")
29	1_vs_5	HALLMARK_INTERFERON_GAMMA_RESPONSE	4.69579043762907e-10	3.80551684931941e-08	0.801216	0.634136	2.04646	185	c("Oas2", "Ifi27", "Trafd1", "Txnip", "Rbck1", "Ddx60", "Sectm1a", "Helz2", "Tap1", "Rtp4", "Rnf213", "Btg1", "Ifi44", "Tapbp", "Irf9", "Rsad2", "Dhx58", "Parp12", "Nfkbia", "Trim21", "Parp14", "Ido1", "Casp4", "Gbp3", "C1s1", "Irf1", "Icam1", "Batf2", "Herc6", "Zbp1", "Irf7", "Cd274", "Bst2", "Pnp", "Usp18", "Trim25", "Ogfr", "Cmpk2", "Irf5", "Isg15", "Stat1", "Pim1", "Sp110", "Pfkp", "Samhd1", …
30	1_vs_6	HALLMARK_ANDROGEN_RESPONSE	0.000572972	0.00151091	0.0859632	-0.674089	-1.41804	95	c("Bmpr1b", "Iqgap2", "Stk39", "Pdlim5", "Mertk", "Map7", "Arid5b", "Zmiz1", "Sec24d", "Hpgd", "Tpd52", "Pias1", "Rps6ka3", "Ell2", "Abcc4", "Ccnd3", "B4galt1", "Appbp2", "Zbtb10", "Homer2", "Abhd2", "Tnfaip8", "Gsr", "Itgav", "Plpp1", "Xrcc6", "Sord", "Elovl5", "Pgm3", "Vapa", "Ptk2b", "Fkbp5", "Ptpn21", "Xrcc5", "Gucy1a1", "Cdk6", "Rab4a", "Krt19", "Herc3", "Maf", "Camkk2", "Acsl3", "Slc38a2", …
31	1_vs_6	HALLMARK_EPITHELIAL_MESENCHYMAL_TRANSITION	0.000270922	0.000899848	0.498493	0.416377	1.42151	193	c("Sat1", "Vegfa", "Ntm", "Col7a1", "Cxcl5", "Col16a1", "Flna", "Lrp1", "Gadd45a", "Qsox1", "Rhob", "Anpep", "Cxcl15", "Tgfbi", "Col1a1", "Col1a2", "Mgp", "Fas", "Wipf1", "Fn1", "Tagln", "Tnc", "Tnfrsf11b", "Col6a3", "Tpm2", "Tpm1", "Bmp1", "Pdlim4", "Prrx1", "Mcm7", "Ccn2", "Igfbp4", "Fgf2", "Dab2", "Wnt5a", "Fbln2", "Efemp2", "Rgs4", "Postn", "Igfbp3", "Eno2", "Comp", "Bgn", "Emp3", "Vcam1", "C…
32	1_vs_6	HALLMARK_INTERFERON_ALPHA_RESPONSE	0.00320019	0.00676404	0.28023	0.467427	1.47047	92	c("Ifi27", "Txnip", "Uba7", "Rsad2", "Trafd1", "Helz2", "Tap1", "Rtp4", "Isg15", "Irf7", "Irf9", "Ifi44", "Trim21", "Bst2", "B2m", "Ogfr", "Dhx58", "Gbp3", "C1s1", "Ifitm1", "Cmpk2", "Parp12", "Psmb8", "Batf2", "Ifit3", "Irf1", "Lpar6", "Ddx60", "Cd74", "Cxcl10", "Sell", "Trim25")
33	1_vs_6	HALLMARK_INTERFERON_GAMMA_RESPONSE	0.000220359	0.000819735	0.518848	0.419295	1.4263	185	c("Oas2", "Ifi27", "Txnip", "Sectm1a", "Rbck1", "Rsad2", "Trafd1", "Helz2", "Tapbp", "Icam1", "Tap1", "Rtp4", "Isg15", "Irf7", "Cd274", "Irf9", "Ifi44", "Trim21", "Bst2", "Pim1", "Irf5", "B2m", "Il10ra", "Ido1", "Ogfr", "Dhx58", "Gbp3", "Tnfaip2", "C1s1", "Nfkbia", "Cmpk2", "Socs3", "Parp12", "Psmb8", "Batf2", "Lcp2", "Pnp", "Ifit3", "H2-Aa", "Psmb10", "Cfh", "Irf1", "Fas", "Fgl2", "Ddx60", "Pfkp…
34	1_vs_6	HALLMARK_PI3K_AKT_MTOR_SIGNALING	0.00980376	0.0168843	0.0206313	-0.622368	-1.31476	105	c("Gsk3b", "Pten", "Mapk1", "Egfr", "Pik3r3", "Plcb1", "Acaca", "Rptor", "Smad2", "Cltc", "Mapkap1", "Pikfyve", "Itpr2", "Rps6ka3", "Cab39l", "Cab39", "Nck1", "Mapk8", "Ripk1", "Ptpn11", "Raf1", "Map2k6", "Ube2n", "Grb2", "Ube2d3", "Atf1", "Eif4e", "Rps6ka1", "Actr2", "Vav3", "Stat2", "Tiam1", "Prkar2a", "Prkag1", "Actr3", "Map3k7", "Rac1", "Prkaa2", "Irak4", "Tbk1", "Ecsit", "Mapk9", "Map2k3", "…
35	1_vs_7	HALLMARK_ANDROGEN_RESPONSE	0.0891995	0.10635322572346778	0.00680775	-0.546352	-1.2463	95	c("Tnfaip8", "Zmiz1", "Map7", "Arid5b", "Pias1", "Stk39", "Pdlim5", "Fkbp5", "B4galt1", "Itgav", "Ank", "Ell2", "Cdk6", "Slc38a2", "Maf", "Pmepa1", "Rps6ka3", "Xrcc5", "Appbp2", "Gsr", "Lifr", "Steap4", "Sec24d", "Sord", "Adamts1", "Camkk2", "Hpgd", "Vapa", "Elk4", "Fads1", "Elovl5", "Cdc14b", "Ndrg1", "Ccnd3", "Ptpn21", "Zbtb10", "Xrcc6", "Hmgcs1", "Herc3", "Mertk", "Selenop", "Dbi", "Slc26a2", …
36	1_vs_7	HALLMARK_EPITHELIAL_MESENCHYMAL_TRANSITION	0.0402539	0.0535279	0.0100877	-0.525562	-1.25158	193	c("Dst", "Tgfbr3", "Lamc1", "Dcn", "Cadm1", "Lama3", "Itgb1", "Itgb5", "Tpm1", "Col4a2", "Itgav", "Timp3", "Spock1", "Notch2", "Lama1", "Itga2", "Tgm2", "Pmepa1", "Mmp14", "Sdc1", "Col7a1", "Matn2", "Bmp1", "Mylk", "Serpine2", "Cald1", "Col16a1", "Lrp1", "Cxcl12", "Col4a1", "Sparc", "Wipf1", "Snai2", "Plod2", "Fstl1", "Lamc2", "Sgcd", "Gja1", "Fmod", "Tgfb1", "Slit2", "Col12a1", "Vegfc", "Htra1",…
37	1_vs_7	HALLMARK_INTERFERON_ALPHA_RESPONSE	4.59432004059237e-06	2.670448523594315e-05	0.610527	0.649968	1.93183	92	c("Ifi27", "Uba7", "Rsad2", "Txnip", "Irf9", "Helz2", "Trafd1", "Ddx60", "Tap1", "Rtp4", "Wars", "Ifi44", "B2m", "Dhx58", "Isg15", "Gbp3", "Irf7", "Cmpk2", "Parp9", "Trim21", "Parp12", "Ogfr", "Lap3", "Irf1", "Bst2", "Sp110", "Batf2", "Psmb8", "Oasl1", "Trim25", "Trim14", "Ifit3", "Parp14", "Stat2", "Psmb9", "Trim26", "Epsti1", "Herc6", "Mvb12a", "Ifi35", "Nub1")
38	1_vs_7	HALLMARK_INTERFERON_GAMMA_RESPONSE	8.97993668643284e-06	4.912553599048553e-05	0.593325	0.512991	1.65725	185	c("Oas2", "Ifi27", "Rbck1", "Sectm1a", "Rsad2", "Txnip", "Irf9", "Helz2", "Trafd1", "Ddx60", "Tap1", "Rtp4", "Wars", "Rnf213", "Tapbp", "Ifi44", "Nfkbia", "B2m", "Dhx58", "Isg15", "Gbp3", "Irf7", "Cmpk2", "Trim21", "Apol6", "Ido1", "Parp12", "Ogfr", "Btg1", "Lap3", "Zbp1", "Irf1", "Tnfaip2", "Bst2", "Sp110", "Il15ra", "Cd274", "Tor1b", "Batf2", "Psmb8", "Lcp2", "Il10ra", "Oasl1", "Trim25", "Psmb1…
39	1_vs_7	HALLMARK_PI3K_AKT_MTOR_SIGNALING	0.0233722	0.034556355860699176	0.0136629	-0.582338	-1.33906	105	c("Egfr", "Vav3", "Plcb1", "Camk4", "Gsk3b", "Mapkap1", "Acaca", "Rptor", "Map2k6", "Itpr2", "Smad2", "Pten", "Mapk1", "Rps6ka3", "Cab39", "Prkaa2", "Tiam1", "Nck1", "Mapk8", "Ube2d3", "Raf1", "Eif4e", "Pikfyve", "Actr3", "Actr2", "Grb2", "Map3k7", "Ptpn11", "Plcg1", "Nod1", "Ube2n", "Cab39l", "Ywhab", "Atf1", "Slc2a1", "Ripk1")
40	1_vs_8	HALLMARK_ANDROGEN_RESPONSE	0.00174417	0.00398996	0.0490818	-0.667905	-1.38728	95	c("Ell2", "Lifr", "Bmpr1b", "Sgk1", "Ank", "Sord", "Cdk6", "Iqgap2", "Stk39", "Sec24d", "Hpgd", "Arid5b", "Pias1", "Rab4a", "Map7", "Abhd2", "Lman1", "Camkk2", "Tpd52", "Ccnd1", "Homer2", "Pdlim5", "Ccnd3", "Appbp2", "Slc38a2", "Ngly1", "Rps6ka3", "Tsc22d1", "Fkbp5", "Uap1", "Xrcc5", "Elovl5", "Zmiz1", "Vapa", "Zbtb10", "Ptpn21", "Xrcc6", "B4galt1", "Cdc14b", "Gnai3")
41	1_vs_8	HALLMARK_EPITHELIAL_MESENCHYMAL_TRANSITION	0.000518184	0.00150597	0.477271	0.391248	1.38473	193	c("Sat1", "Cd44", "Vegfa", "Anpep", "Cxcl5", "Itga2", "Dst", "Cxcl15", "Sdc4", "Flna", "Ntm", "Gadd45a", "Pdlim4", "Sdc1", "Pmepa1", "Mcm7", "Lamc2", "Dpysl3", "Wipf1", "Lrp1", "Jun", "Ccn2", "Fn1", "Gpc1", "Col5a2", "Tagln", "Ecm1", "Tpm2", "Tnc", "Spp1", "Mmp14", "Col4a1", "Rgs4", "Tgm2", "Tnfrsf12a", "Tnfrsf11b", "Plod2", "Col7a1", "Cxcl12", "Col1a2", "Prrx1", "P3h1", "Mgp", "Itga5", "Cdh11", …
42	1_vs_8	HALLMARK_INTERFERON_ALPHA_RESPONSE	8.62204962181219e-07	7.866854201534232e-06	0.659444	0.611128	2.00593	92	c("Ifi27", "Ddx60", "Txnip", "Trafd1", "Rsad2", "Helz2", "Uba7", "Tap1", "Ifi44", "Parp14", "Parp12", "Herc6", "Irf1", "Isg15", "Psmb8", "Dhx58", "Usp18", "Irf7", "Bst2", "Rtp4", "Irf9", "Cmpk2", "Stat2", "Ifitm3", "Oasl1", "Cxcl10", "Ifit3", "Ifit2", "Ifih1", "Plscr1", "Gbp3", "Ogfr", "Adar", "Csf1", "Psmb9", "Sp110", "C1s1", "Lgals3bp", "Ifi35", "Ube2l6", "Trim21", "Cd74", "Oas1a", "Isg20")
43	1_vs_8	HALLMARK_INTERFERON_GAMMA_RESPONSE	5.53426766426208e-08	1.2867172319409336e-06	0.719513	0.511697	1.80067	185	c("Oas2", "Rnf213", "Ifi27", "Ddx60", "Tapbp", "Txnip", "Trafd1", "Rbck1", "Rsad2", "Helz2", "Tap1", "Stat1", "Ifi44", "Parp14", "Parp12", "Herc6", "Irf1", "Isg15", "Btg1", "Psmb8", "Nfkbia", "Sectm1a", "Dhx58", "Casp4", "Usp18", "Irf7", "Bst2", "Rtp4", "Zbp1", "Irf9", "Cmpk2", "Psmb10", "Stat2", "Irf5", "Ifitm3", "Cd274", "H2-Aa", "Oasl1", "Cxcl10", "Ifit3", "Ddx58", "Ifit2", "Bank1", "Oas3", "X…
44	1_vs_8	HALLMARK_PI3K_AKT_MTOR_SIGNALING	0.0536337	0.0656307	0.0086056	-0.591825	-1.23332	105	c("Plcb1", "Cab39l", "Mapkap1", "Nck1", "Acaca", "Rptor", "Gsk3b", "Mapk1", "Mapk8", "Map2k6", "Cab39", "Rps6ka3", "Raf1", "Ube2d3", "Smad2", "Them4", "Tbk1", "Pikfyve", "Grb2", "Slc2a1", "Atf1", "Eif4e", "Ptpn11", "Cltc", "Pten", "Actr2", "Cdkn1b", "Ube2n", "Ppp2r1b", "Nod1", "Arf1", "Actr3", "Ripk1", "Sqstm1", "Prkar2a", "Ywhab", "Dusp3", "Ecsit", "Rps6ka1", "Map3k7", "Ralb", "Rac1", "Pdk1", "M…
45	1_vs_9	wong_embryonic_stem_cell_core	0.0331914	0.045394154275115846	0.011016	-0.51282	-1.18927	323	c("CTNNA1", "EIF3A", "EIF2S2", "ELOVL6", "UBE2G1", "SUMO1", "PROM1", "ALDH7A1", "TCF7L1", "RAD23B", "RPS19", "RPS27", "IPO9", "KRAS", "PSMD14", "YAP1", "DHX9", "RPL13", "RPS23", "YY1", "RPS16", "RPL27A", "CCND2", "RPS3", "SMC4", "LYPLA1", "NCL", "MRPS28", "MSH2", "XRCC5", "NME2", "DPP3", "TERF1", "MTF2", "RPS12", "RPS8", "NONO", "SRSF10", "CHEK2", "GMNN", "HSPA9", "ETFA", "RPS5", "ABCB7", "MTHFD2…
46	1_vs_9	HALLMARK_PI3K_AKT_MTOR_SIGNALING	0.000537435	0.00151091	0.089535	-0.651339	-1.45696	105	c("Plcb1", "Gsk3b", "Mapkap1", "Cab39l", "Cab39", "Rptor", "Nck1", "Mapk1", "Acaca", "Ube2d3", "Pik3r3", "Smad2", "Mapk8", "Pikfyve", "Grb2", "Rps6ka3", "Raf1", "Prkaa2", "Cltc", "Itpr2", "Actr2", "Ptpn11", "Ywhab", "Ralb", "Pten", "Atf1", "Cdkn1b", "Map2k6", "Mapk10", "Ube2n", "Eif4e", "Actr3", "Trib3", "Dusp3", "Arf1", "Prkar2a", "Map3k7", "Sqstm1", "Camk4", "Them4", "Ecsit", "Nod1", "Ripk1", "…
47	1_vs_9	HALLMARK_INTERFERON_ALPHA_RESPONSE	3.59545241580907e-05	0.000159227	0.557332	0.580229	1.78455	92	c("Ifi27", "Uba7", "Trafd1", "Txnip", "Ddx60", "Rsad2", "Tap1", "Helz2", "Irf9", "Rtp4", "Cmpk2", "Trim21", "Ifi44", "Parp12", "Dhx58", "C1s1", "Irf1", "Gbp3", "Irf7", "Parp14", "Herc6", "Isg15", "Ifit3", "Trim25", "Ifitm1", "Ogfr", "Stat2", "Sp110", "Batf2", "Bst2", "Oasl1", "Cxcl10", "Psmb9", "Adar", "Usp18", "Psmb8", "Ifih1")
48	1_vs_9	HALLMARK_INTERFERON_GAMMA_RESPONSE	4.20858560876922e-07	4.348871795728194e-06	0.674963	0.517482	1.72891	185	c("Oas2", "Ifi27", "Sectm1a", "Rbck1", "Trafd1", "Txnip", "Ddx60", "Rsad2", "Tap1", "Helz2", "Rnf213", "Irf9", "Rtp4", "Cmpk2", "Trim21", "Tapbp", "Ifi44", "Parp12", "Dhx58", "Cd274", "C1s1", "Irf1", "Gbp3", "Irf7", "Parp14", "Pfkp", "Btg1", "Herc6", "Ido1", "Il10ra", "Isg15", "Stat1", "Pim1", "Ifit3", "Trim25", "Bank1", "Icam1", "Zbp1", "H2-Aa", "Irf5", "Socs3", "Ogfr", "Nfkbia", "Stat2", "Sp110…
49	1_vs_9	HALLMARK_ANDROGEN_RESPONSE	0.00110517	0.00270475	0.0626039	-0.651041	-1.44737	95	c("Stk39", "Ell2", "Sec24d", "Arid5b", "Pdlim5", "Lifr", "Ank", "Pias1", "Map7", "Bmpr1b", "Rab4a", "Slc38a2", "Uap1", "Sgk1", "B4galt1", "Tpd52", "Elovl5", "Lman1", "Zmiz1", "Fkbp5", "Cdk6", "Ptpn21", "Rps6ka3", "Hpgd", "Slc26a2", "Appbp2", "Krt8", "Zbtb10", "Xrcc6", "Xrcc5", "Vapa", "B2m", "Gnai3", "Sord", "Herc3", "Ngly1", "Dbi", "Iqgap2", "Homer2", "Itgav", "Ube2j1", "Gsr", "Plpp1", "Cdc14b",…
50	1_vs_9	HALLMARK_EPITHELIAL_MESENCHYMAL_TRANSITION	0.00799559	0.0142998	0.27022	0.380244	1.2748	193	c("Ntm", "Vegfa", "Col7a1", "Sat1", "Gadd45a", "Pdlim4", "Anpep", "Cd44", "Flna", "Lrp1", "Cxcl5", "Dst", "Col16a1", "Mcm7", "Col1a2", "Sdc4", "Fap", "Fn1", "Col6a3", "Eno2", "Col1a1", "Rgs4", "Gpc1", "Bmp1", "Prrx1", "Col4a1", "Lamc2", "Thy1", "Cthrc1", "Col5a2", "Comp", "Sgcb", "Tgfbi", "Igfbp4", "Serpine1", "Gas1", "Wipf1", "Col6a2", "Thbs1", "Cxcl15", "Tagln", "Cdh6", "Emp3", "Itgb3", "Dpysl3…
51	1_vs_9	lein_neuron_markers	0.398638	0.4165545655889963	0.0125181	0.344639	1.01325	67	c("Snhg11", "Slc22a17", "Kifc2", "Fbxw5", "Myo5a", "Gria4", "Meg3", "Alcam", "Grin2b", "Camk2a", "Prkar1b", "Unc80", "Ryr2", "Ndrg4", "Tcaf1", "Syt1", "Jakmip1")
52	1_vs_9	kegg_prostate_cancer	0.0530644	0.0656307	0.00883558	-0.577667	-1.27567	86	c("FGFR2", "AR", "CREB3L2", "PIK3R1", "GSK3B", "BRAF", "CREBBP", "IGF1R", "BCL2", "MAPK1", "SOS2", "TCF7L1", "AKT3", "PIK3R3", "CREB5", "CREB1", "KRAS", "GRB2", "RAF1", "TCF7L2", "EP300", "PIK3CA", "FOXO1", "RB1", "SOS1", "PTEN", "MTOR", "PIK3CB", "CDKN1B", "PDPK1", "CHUK", "NFKB1", "MAP2K2", "CCND1", "IKBKG", "MAP2K1", "E2F3", "CREB3L1", "HSP90AA1", "TCF7", "EGF")
53	2_v_1	HALLMARK_ANDROGEN_RESPONSE	0.000175594	0.000710011	0.155105	0.70182	1.39853	95	c("Bmpr1b", "Arid5b", "Stk39", "Iqgap2", "Sec24d", "Pdlim5", "Homer2", "Map7", "Fkbp5", "Pias1", "Ank", "Ell2", "Zmiz1", "Mertk", "Tpd52", "Ccnd3", "Rps6ka3", "Hpgd", "Cdk6", "Abcc4", "Appbp2", "B4galt1", "Zbtb10", "Abhd2", "Rab4a", "Lifr", "Ptpn21", "Xrcc6", "Vapa", "Lman1", "Xrcc5", "Sord", "Elovl5", "Slc38a2", "Plpp1", "Herc3", "Pgm3", "Ngly1", "Ptk2b", "Spdef", "Ncoa4", "Itgav", "Actn1", "Cdc…
54	2_v_1	HALLMARK_EPITHELIAL_MESENCHYMAL_TRANSITION	0.00137454	0.00327775	0.45506	-0.393921	-1.30823	193	c("Sat1", "Vegfa", "Ntm", "Flna", "Cxcl5", "Qsox1", "Gadd45a", "Lrp1", "Col7a1", "Cxcl15", "Cd44", "Mcm7", "Col16a1", "Rhob", "Col1a1", "Tgfbi", "Jun", "Col1a2", "Dab2", "Ccn2", "Col6a3", "Mgp", "Bmp1", "Ecm1", "Tagln", "Pdlim4", "Areg", "Tnc", "Wipf1", "Tnfrsf11b", "Fn1", "Col3a1", "Col5a2", "Cdh6", "Tpm2", "Postn", "Fbln2", "Vcam1", "Id2", "Lama2", "Igfbp4", "Tpm1", "Anpep", "Serpine1", "Plod2"…
55	2_v_1	HALLMARK_INTERFERON_ALPHA_RESPONSE	0.000495459	0.00148638	0.477271	-0.519007	-1.58711	92	c("Ifi27", "Uba7", "Txnip", "Rsad2", "Helz2", "Ddx60", "Trafd1", "Tap1", "B2m", "Irf9", "Irf7", "Rtp4", "Ifi44", "Isg15", "Trim21", "Dhx58", "Parp12", "Ogfr", "Bst2", "Cmpk2", "Gbp3", "Irf1", "C1s1", "Oasl1", "Ifitm1", "Psmb8", "Ifit3", "Batf2", "Lpar6", "Trim25", "Cd74", "Samd9l", "Cxcl10", "Ifit2", "Herc6", "Usp18", "Parp9", "Psmb9", "Ube2l6", "Nub1", "Sell", "Parp14")
56	2_v_1	HALLMARK_INTERFERON_GAMMA_RESPONSE	1.44880775170041e-05	7.485506717118786e-05	0.593325	-0.446525	-1.47154	185	c("Oas2", "Ifi27", "Rbck1", "Txnip", "Rsad2", "Helz2", "Sectm1a", "Ddx60", "Trafd1", "Tap1", "Tapbp", "B2m", "Irf9", "Irf7", "Rtp4", "Ifi44", "Icam1", "Isg15", "Trim21", "Dhx58", "Parp12", "Ogfr", "Nfkbia", "Bst2", "Cd274", "Cmpk2", "Gbp3", "Irf1", "Ido1", "Rnf213", "C1s1", "Stat1", "Il10ra", "Oas3", "Tnfaip2", "Zbp1", "Irf5", "Pfkp", "Oasl1", "Psmb8", "Ifit3", "Socs3", "Lcp2", "Batf2", "Btg1", "…
57	2_v_1	HALLMARK_PI3K_AKT_MTOR_SIGNALING	0.0157357	0.0252313	0.0161932	0.630946	1.26153	105	c("Plcb1", "Mapk1", "Gsk3b", "Rptor", "Pten", "Acaca", "Cab39l", "Nck1", "Mapkap1", "Cltc", "Rps6ka3", "Ube2d3", "Pikfyve", "Cab39", "Egfr", "Smad2", "Mapk8", "Raf1", "Gna14", "Grb2", "Ube2n", "Eif4e", "Rps6ka1", "Ripk1", "Actr2", "Atf1", "Prkar2a", "Map2k6", "Ptpn11", "Prkaa2", "Actr3", "Ecsit", "Irak4", "Rac1", "Pik3r3", "Tbk1", "Map3k7", "Ywhab", "Ppp2r1b", "Itpr2", "Prkag1", "Them4", "Dusp3",…
58	3_v_1	HALLMARK_EPITHELIAL_MESENCHYMAL_TRANSITION	0.998356	0.99841	0.000131454	0.292617	0.611638	193	c("Cadm1", "Notch2", "Il15", "Itga2", "Cd44", "Sntb1", "Lamc1", "Itgav", "Tpm1", "Cxcl15", "Basp1", "Itgb1", "Mmp14", "Lamc2", "Pmepa1", "Ppib", "Thbs1", "Colgalt1", "Tgfbr3", "Itgb5", "Lama3", "Fuca1", "Slc6a8", "Vegfc", "Qsox1", "Cxcl5", "Cap2", "Sdc1", "Pvr", "Dst", "Sdc4", "Spock1", "Gja1", "Plod2", "Jun", "Tpm4", "Slit2", "Tgm2", "Plaur", "Itga5")
59	3_v_1	HALLMARK_INTERFERON_ALPHA_RESPONSE	0.223382	0.2360739909971999	0.00385968	0.554261	1.13079	92	c("Ly6e", "Irf2", "Elf1", "Epsti1", "Eif2ak2", "Plscr1", "Il15", "Herc6", "Ifitm3", "Ifih1", "Psma3", "Cd47", "Parp14", "Stat2", "Lgals3bp", "Usp18", "Ripk2", "Tdrd7", "Nmi", "Rnf31", "Mov10", "Trim12c", "Parp9", "Oas1a", "Psme2", "Casp8", "Gmpr", "Sp110", "Ddx60", "Il7", "Samd9l", "Oasl1", "Casp1", "Pnpt1", "Tmem140", "Ifi44", "Ifit2", "Adar", "Ifitm2", "Psme1", "Isg20", "Ifit3", "Csf1", "Psmb9"…
60	3_v_1	HALLMARK_INTERFERON_GAMMA_RESPONSE	0.219172	0.2360739909971999	0.00385837	0.527666	1.10196	185	c("Nfkb1", "Ly6e", "Irf2", "Rapgef6", "Epsti1", "Tnfsf10", "Eif2ak2", "Arid5b", "Pla2g4a", "Sppl2a", "Plscr1", "Il15", "Peli1", "Auts2", "Rnf213", "Stat3", "Herc6", "Stat1", "Ifitm3", "Ifih1", "Psma3", "Cfh", "Parp14", "Stat2", "Ptpn1", "Lgals3bp", "Usp18", "Ripk2", "Tdrd7", "Jak2", "Nlrc5", "Nmi", "Rnf31", "Ncoa3", "Ddx58", "Hif1a", "Oas3", "Xaf1", "Ptpn2", "Psme2", "Btg1", "Ripk1", "Casp4", "La…
61	3_v_1	HALLMARK_PI3K_AKT_MTOR_SIGNALING	0.00620104	0.0122609	0.0260497	0.648587	1.33108	105	c("Egfr", "Gsk3b", "Rps6ka3", "Itpr2", "Pten", "Pik3r3", "Gna14", "Mapk1", "Cab39", "Smad2", "Mapkap1", "Rptor", "Cltc", "Ube2d3", "Pikfyve", "Prkaa2", "Cab39l", "Actr2", "Acaca", "Raf1", "Stat2", "Grb2", "Dapp1", "Actr3", "Mapk8", "Nck1", "Vav3", "Irak4", "Ripk1", "Rps6ka1", "Ube2n", "Ptpn11", "Eif4e", "Map3k7", "Atf1", "Prkar2a", "Tiam1", "Map2k6", "Plcb1", "Ecsit", "Cdkn1a", "Mapk9", "Rac1", "…
62	3_v_1	HALLMARK_ANDROGEN_RESPONSE	0.0234091	0.034556355860699176	0.013321	0.629548	1.28638	95	c("Abcc4", "Cdk6", "Map7", "Rps6ka3", "Stk39", "Pdlim5", "Zmiz1", "Tnfaip8", "Arid5b", "Ccnd3", "B4galt1", "Pias1", "Appbp2", "Itgav", "Sec24d", "Tpd52", "Iqgap2", "Krt19", "Ell2", "Tmprss2", "Ank", "Xrcc6", "Homer2", "Gsr", "Krt8", "Fkbp5", "Vapa", "Acsl3", "Elk4", "Elovl5", "Rab4a", "Slc38a2", "Xrcc5", "Ptpn21", "Pmepa1", "Steap4", "Selenop", "Ube2j1", "Plpp1", "Herc3", "Aldh1a3", "Gnai3", "Ada…
63	4_v_1	HALLMARK_ANDROGEN_RESPONSE	0.028598	0.0399159	0.0120301	0.618935	1.28041	95	c("Abcc4", "Arid5b", "Pdlim5", "Stk39", "Rps6ka3", "Tnfaip8", "Map7", "Zmiz1", "Cdk6", "B4galt1", "Ccnd3", "Tmprss2", "Krt19", "Sec24d", "Pias1", "Pmepa1", "Tpd52", "Homer2", "Appbp2", "Iqgap2", "Xrcc6", "Acsl3", "Itgav", "Ell2", "Vapa", "Xrcc5", "Gsr", "Krt8", "Elovl5", "Rab4a", "Herc3", "Elk4", "Slc38a2", "Ptpn21", "Selenop", "Mertk", "Actn1", "Cdc14b", "Plpp1", "Ank", "Ube2j1", "Abhd2", "Steap…
64	4_v_1	HALLMARK_EPITHELIAL_MESENCHYMAL_TRANSITION	0.990369	0.99841	0.000228804	0.321301	0.680544	193	c("Cadm1", "Itga2", "Notch2", "Basp1", "Cd44", "Sntb1", "Pmepa1", "Thbs1", "Itgav", "Lamc1", "Cxcl15", "Qsox1", "Itgb1", "Cap2", "Mmp14", "Tpm1", "Il15", "Cdh2", "Fuca1", "Dst", "Jun", "Wnt5a", "Lamc2", "Lama3", "Colgalt1")
65	4_v_1	HALLMARK_INTERFERON_ALPHA_RESPONSE	0.112482	0.13076065204702708	0.039234	-0.389098	-1.16634	92	c("Ifi27", "Uba7", "Rsad2", "Trafd1", "B2m", "Helz2", "Txnip", "Tap1", "Irf9", "Trim21", "Rtp4", "Isg15", "Irf7", "Dhx58", "Cmpk2", "Gbp3", "C1s1", "Bst2", "Ifi44", "Parp12", "Ogfr", "Batf2", "Ifitm1", "Ifit3", "Wars", "Trim25", "Ddx60", "Cxcl10", "Lap3")
66	4_v_1	HALLMARK_INTERFERON_GAMMA_RESPONSE	0.124924	0.14168190127970767	0.100865	-0.340702	-1.10675	185	c("Oas2", "Ifi27", "Rbck1", "Sectm1a", "Rsad2", "Trafd1", "B2m", "Helz2", "Txnip", "Tap1", "Irf9", "Trim21", "Rtp4", "Isg15", "Irf7", "Cd274", "Apol6", "Dhx58", "Ido1", "Pim1", "Cmpk2", "Gbp3", "Tapbp", "C1s1", "Bst2", "Il10ra", "Ifi44", "Parp12", "Irf5", "Ogfr", "Socs3", "Fas", "Socs1", "Batf2", "Pnp", "Lcp2", "Ifit3", "Tor1b", "Wars", "Pde4b", "Tnfaip2", "Ptpn6", "Mthfd2", "Nfkbia", "Trim25", "…
67	4_v_1	HALLMARK_PI3K_AKT_MTOR_SIGNALING	0.011624	0.019369070117640524	0.0189905	0.631798	1.31282	105	c("Rps6ka3", "Gsk3b", "Pik3r3", "Itpr2", "Gna14", "Pten", "Egfr", "Plcb1", "Cab39", "Mapk1", "Rptor", "Smad2", "Cab39l", "Mapkap1", "Pikfyve", "Cltc", "Acaca", "Actr3", "Ube2d3", "Map2k6", "Raf1", "Actr2", "Grb2", "Dapp1", "Mapk8", "Nck1", "Prkaa2", "Mapk9", "Irak4", "Ripk1", "Eif4e", "Rps6ka1", "Ube2n", "Ptpn11", "Vav3", "Map3k7", "Atf1", "Prkar2a", "Ywhab", "Prkag1", "Rac1", "Stat2", "Tbk1", "E…
68	5_v_1	HALLMARK_PI3K_AKT_MTOR_SIGNALING	0.166755	0.1846221138689889	0.00572532	0.424126	1.17642	105	c("Plcb1", "Mapkap1", "Cab39l", "Acaca", "Rptor", "Gsk3b", "Map2k6", "Pik3r3", "Nck1", "Mapk1", "Ywhab", "Atf1", "Them4", "Dusp3", "Mapk10", "Ptpn11", "Smad2", "Rps6ka3", "Pikfyve", "Ppp2r1b", "Itpr2", "Ecsit", "Ripk1", "Cfl1", "Cab39", "Raf1", "Grb2", "Prkar2a", "Nod1", "Mapk8", "Eif4e", "Cltc", "Tiam1", "Map3k7", "Pla2g12a", "Prkag1", "Actr2", "Ngf", "Pten", "Ralb", "Rps6ka1", "Pin1", "Akt1", "…
69	5_v_1	HALLMARK_ANDROGEN_RESPONSE	0.00659188	0.0122609	0.0306661	0.548271	1.5011	95	c("Bmpr1b", "Ell2", "Lifr", "Stk39", "Arid5b", "Sec24d", "Sgk1", "Ank", "Hpgd", "Cdk6", "Sord", "Lman1", "Rab4a", "Iqgap2", "Zmiz1", "Pias1", "Uap1", "Homer2", "Camkk2", "Krt8", "Ptpn21", "Elovl5", "Pdlim5", "Map7", "Xrcc5", "Tpd52", "Ccnd3", "Rps6ka3", "Ccnd1", "Zbtb10", "B4galt1", "Selenop", "Slc26a2", "Pa2g4")
70	5_v_1	HALLMARK_EPITHELIAL_MESENCHYMAL_TRANSITION	0.0050707	0.010251640010349934	0.0548646	-0.434321	-1.40871	193	c("Sat1", "Vegfa", "Gadd45a", "Flna", "Anpep", "Pdlim4", "Qsox1", "Sdc4", "Mcm7", "Ntm", "Cd44", "Lrp1", "Col16a1", "Col7a1", "Dst", "Lamc2", "Cxcl5", "Copa", "Tnfrsf11b", "Fas", "Bmp1", "Thy1", "Pvr", "Col1a1", "Fgf2", "Rhob", "Serpine1", "Tnfaip3", "Comp", "Tgfbi", "Sgcb", "Fbln2", "Tpm1", "Cxcl15", "Gpc1", "Sdc1", "Igfbp2", "Lox", "Prrx1", "Tnfrsf12a", "Jun", "Dpysl3", "Id2", "Eno2", "Foxc2", …
71	5_v_1	HALLMARK_INTERFERON_ALPHA_RESPONSE	2.25584506835865e-06	1.4985256525525317e-05	0.627257	-0.68533	-2.01704	92	c("Ifi27", "Trafd1", "Txnip", "Uba7", "Ddx60", "Helz2", "Tap1", "Rtp4", "Ifi44", "Irf9", "Rsad2", "Dhx58", "Parp12", "Trim21", "Parp14", "Gbp3", "C1s1", "Irf1", "Batf2", "Herc6", "Irf7", "Bst2", "Usp18", "Trim25", "Ogfr", "Cmpk2", "Isg15", "Sp110", "Nub1", "Psmb9", "Adar", "Wars", "Ifi35", "Ifitm1", "Lpar6", "Psmb8", "Lap3", "Mvb12a", "Oas1a", "Pnpt1", "Plscr1")
72	5_v_1	HALLMARK_INTERFERON_GAMMA_RESPONSE	8.18390720283744e-10	3.80551684931941e-08	0.801216	-0.634136	-2.04741	185	c("Oas2", "Ifi27", "Trafd1", "Txnip", "Rbck1", "Ddx60", "Sectm1a", "Helz2", "Tap1", "Rtp4", "Rnf213", "Btg1", "Ifi44", "Tapbp", "Irf9", "Rsad2", "Dhx58", "Parp12", "Nfkbia", "Trim21", "Parp14", "Ido1", "Casp4", "Gbp3", "C1s1", "Irf1", "Icam1", "Batf2", "Herc6", "Zbp1", "Irf7", "Cd274", "Bst2", "Pnp", "Usp18", "Trim25", "Ogfr", "Cmpk2", "Irf5", "Isg15", "Stat1", "Pim1", "Sp110", "Pfkp", "Samhd1", …
73	6_v_1	HALLMARK_ANDROGEN_RESPONSE	0.000564632	0.00151091	0.0865809	0.674089	1.41875	95	c("Bmpr1b", "Iqgap2", "Stk39", "Pdlim5", "Mertk", "Map7", "Arid5b", "Zmiz1", "Sec24d", "Hpgd", "Tpd52", "Pias1", "Rps6ka3", "Ell2", "Abcc4", "Ccnd3", "B4galt1", "Appbp2", "Zbtb10", "Homer2", "Abhd2", "Tnfaip8", "Gsr", "Itgav", "Plpp1", "Xrcc6", "Sord", "Elovl5", "Pgm3", "Vapa", "Ptk2b", "Fkbp5", "Ptpn21", "Xrcc5", "Gucy1a1", "Cdk6", "Rab4a", "Krt19", "Herc3", "Maf", "Camkk2", "Acsl3", "Slc38a2", …
74	6_v_1	HALLMARK_EPITHELIAL_MESENCHYMAL_TRANSITION	0.000249712	0.000860118	0.498493	-0.416377	-1.41919	193	c("Sat1", "Vegfa", "Ntm", "Col7a1", "Cxcl5", "Col16a1", "Flna", "Lrp1", "Gadd45a", "Qsox1", "Rhob", "Anpep", "Cxcl15", "Tgfbi", "Col1a1", "Col1a2", "Mgp", "Fas", "Wipf1", "Fn1", "Tagln", "Tnc", "Tnfrsf11b", "Col6a3", "Tpm2", "Tpm1", "Bmp1", "Pdlim4", "Prrx1", "Mcm7", "Ccn2", "Igfbp4", "Fgf2", "Dab2", "Wnt5a", "Fbln2", "Efemp2", "Rgs4", "Postn", "Igfbp3", "Eno2", "Comp", "Bgn", "Emp3", "Vcam1", "C…
75	6_v_1	HALLMARK_PI3K_AKT_MTOR_SIGNALING	0.00977352	0.0168843	0.0206615	0.622368	1.31531	105	c("Gsk3b", "Pten", "Mapk1", "Egfr", "Pik3r3", "Plcb1", "Acaca", "Rptor", "Smad2", "Cltc", "Mapkap1", "Pikfyve", "Itpr2", "Rps6ka3", "Cab39l", "Cab39", "Nck1", "Mapk8", "Ripk1", "Ptpn11", "Raf1", "Map2k6", "Ube2n", "Grb2", "Ube2d3", "Atf1", "Eif4e", "Rps6ka1", "Actr2", "Vav3", "Stat2", "Tiam1", "Prkar2a", "Prkag1", "Actr3", "Map3k7", "Rac1", "Prkaa2", "Irak4", "Tbk1", "Ecsit", "Mapk9", "Map2k3", "…
76	6_v_1	HALLMARK_INTERFERON_GAMMA_RESPONSE	0.00048481	0.00148638	0.498493	-0.419295	-1.42584	185	c("Oas2", "Ifi27", "Txnip", "Sectm1a", "Rbck1", "Rsad2", "Trafd1", "Helz2", "Tapbp", "Icam1", "Tap1", "Rtp4", "Isg15", "Irf7", "Cd274", "Irf9", "Ifi44", "Trim21", "Bst2", "Pim1", "Irf5", "B2m", "Il10ra", "Ido1", "Ogfr", "Dhx58", "Gbp3", "Tnfaip2", "C1s1", "Nfkbia", "Cmpk2", "Socs3", "Parp12", "Psmb8", "Batf2", "Lcp2", "Pnp", "Ifit3", "H2-Aa", "Psmb10", "Cfh", "Irf1", "Fas", "Fgl2", "Ddx60", "Pfkp…
77	6_v_1	HALLMARK_INTERFERON_ALPHA_RESPONSE	0.00262781	0.0056834	0.311105	-0.467427	-1.47901	92	c("Ifi27", "Txnip", "Uba7", "Rsad2", "Trafd1", "Helz2", "Tap1", "Rtp4", "Isg15", "Irf7", "Irf9", "Ifi44", "Trim21", "Bst2", "B2m", "Ogfr", "Dhx58", "Gbp3", "C1s1", "Ifitm1", "Cmpk2", "Parp12", "Psmb8", "Batf2", "Ifit3", "Irf1", "Lpar6", "Ddx60", "Cd74", "Cxcl10", "Sell", "Trim25")
78	7_v_1	HALLMARK_ANDROGEN_RESPONSE	0.0890761	0.10635322572346778	0.00681361	0.546352	1.24655	95	c("Tnfaip8", "Zmiz1", "Map7", "Arid5b", "Pias1", "Stk39", "Pdlim5", "Fkbp5", "B4galt1", "Itgav", "Ank", "Ell2", "Cdk6", "Slc38a2", "Maf", "Pmepa1", "Rps6ka3", "Xrcc5", "Appbp2", "Gsr", "Lifr", "Steap4", "Sec24d", "Sord", "Adamts1", "Camkk2", "Hpgd", "Vapa", "Elk4", "Fads1", "Elovl5", "Cdc14b", "Ndrg1", "Ccnd3", "Ptpn21", "Zbtb10", "Xrcc6", "Hmgcs1", "Herc3", "Mertk", "Selenop", "Dbi", "Slc26a2", …
79	7_v_1	HALLMARK_EPITHELIAL_MESENCHYMAL_TRANSITION	0.0402898	0.0535279	0.0100848	0.525562	1.25175	193	c("Dst", "Tgfbr3", "Lamc1", "Dcn", "Cadm1", "Lama3", "Itgb1", "Itgb5", "Tpm1", "Col4a2", "Itgav", "Timp3", "Spock1", "Notch2", "Lama1", "Itga2", "Tgm2", "Pmepa1", "Mmp14", "Sdc1", "Col7a1", "Matn2", "Bmp1", "Mylk", "Serpine2", "Cald1", "Col16a1", "Lrp1", "Cxcl12", "Col4a1", "Sparc", "Wipf1", "Snai2", "Plod2", "Fstl1", "Lamc2", "Sgcd", "Gja1", "Fmod", "Tgfb1", "Slit2", "Col12a1", "Vegfc", "Htra1",…
80	7_v_1	HALLMARK_INTERFERON_ALPHA_RESPONSE	3.77518821681585e-06	2.3406166944258272e-05	0.627257	-0.649968	-1.92942	92	c("Ifi27", "Uba7", "Rsad2", "Txnip", "Irf9", "Helz2", "Trafd1", "Ddx60", "Tap1", "Rtp4", "Wars", "Ifi44", "B2m", "Dhx58", "Isg15", "Gbp3", "Irf7", "Cmpk2", "Parp9", "Trim21", "Parp12", "Ogfr", "Lap3", "Irf1", "Bst2", "Sp110", "Batf2", "Psmb8", "Oasl1", "Trim25", "Trim14", "Ifit3", "Parp14", "Stat2", "Psmb9", "Trim26", "Epsti1", "Herc6", "Mvb12a", "Ifi35", "Nub1")
81	7_v_1	HALLMARK_INTERFERON_GAMMA_RESPONSE	1.67184279329469e-05	8.183230514547692e-05	0.57561	-0.512991	-1.65618	185	c("Oas2", "Ifi27", "Rbck1", "Sectm1a", "Rsad2", "Txnip", "Irf9", "Helz2", "Trafd1", "Ddx60", "Tap1", "Rtp4", "Wars", "Rnf213", "Tapbp", "Ifi44", "Nfkbia", "B2m", "Dhx58", "Isg15", "Gbp3", "Irf7", "Cmpk2", "Trim21", "Apol6", "Ido1", "Parp12", "Ogfr", "Btg1", "Lap3", "Zbp1", "Irf1", "Tnfaip2", "Bst2", "Sp110", "Il15ra", "Cd274", "Tor1b", "Batf2", "Psmb8", "Lcp2", "Il10ra", "Oasl1", "Trim25", "Psmb1…
82	7_v_1	HALLMARK_PI3K_AKT_MTOR_SIGNALING	0.0229869	0.034556355860699176	0.0137822	0.582338	1.33897	105	c("Egfr", "Vav3", "Plcb1", "Camk4", "Gsk3b", "Mapkap1", "Acaca", "Rptor", "Map2k6", "Itpr2", "Smad2", "Pten", "Mapk1", "Rps6ka3", "Cab39", "Prkaa2", "Tiam1", "Nck1", "Mapk8", "Ube2d3", "Raf1", "Eif4e", "Pikfyve", "Actr3", "Actr2", "Grb2", "Map3k7", "Ptpn11", "Plcg1", "Nod1", "Ube2n", "Cab39l", "Ywhab", "Atf1", "Slc2a1", "Ripk1", "Prkar2a", "Cltc", "Tbk1", "Ppp2r1b", "Prkag1", "Dusp3", "Tnfrsf1a",…
83	8_v_1	HALLMARK_INTERFERON_ALPHA_RESPONSE	1.04465223334781e-07	1.9430531540269265e-06	0.704976	-0.611128	-2.00611	92	c("Ifi27", "Ddx60", "Txnip", "Trafd1", "Rsad2", "Helz2", "Uba7", "Tap1", "Ifi44", "Parp14", "Parp12", "Herc6", "Irf1", "Isg15", "Psmb8", "Dhx58", "Usp18", "Irf7", "Bst2", "Rtp4", "Irf9", "Cmpk2", "Stat2", "Ifitm3", "Oasl1", "Cxcl10", "Ifit3", "Ifit2", "Ifih1", "Plscr1", "Gbp3", "Ogfr", "Adar", "Csf1", "Psmb9", "Sp110", "C1s1", "Lgals3bp", "Ifi35", "Ube2l6", "Trim21", "Cd74", "Oas1a", "Isg20")
84	8_v_1	HALLMARK_EPITHELIAL_MESENCHYMAL_TRANSITION	0.000281667	0.000903277	0.498493	-0.391248	-1.38303	193	c("Sat1", "Cd44", "Vegfa", "Anpep", "Cxcl5", "Itga2", "Dst", "Cxcl15", "Sdc4", "Flna", "Ntm", "Gadd45a", "Pdlim4", "Sdc1", "Pmepa1", "Mcm7", "Lamc2", "Dpysl3", "Wipf1", "Lrp1", "Jun", "Ccn2", "Fn1", "Gpc1", "Col5a2", "Tagln", "Ecm1", "Tpm2", "Tnc", "Spp1", "Mmp14", "Col4a1", "Rgs4", "Tgm2", "Tnfrsf12a", "Tnfrsf11b", "Plod2", "Col7a1", "Cxcl12", "Col1a2", "Prrx1", "P3h1", "Mgp", "Itga5", "Cdh11", …
85	8_v_1	HALLMARK_ANDROGEN_RESPONSE	0.00175901	0.00398996	0.0488834	0.667905	1.38687	95	c("Ell2", "Lifr", "Bmpr1b", "Sgk1", "Ank", "Sord", "Cdk6", "Iqgap2", "Stk39", "Sec24d", "Hpgd", "Arid5b", "Pias1", "Rab4a", "Map7", "Abhd2", "Lman1", "Camkk2", "Tpd52", "Ccnd1", "Homer2", "Pdlim5", "Ccnd3", "Appbp2", "Slc38a2", "Ngly1", "Rps6ka3", "Tsc22d1", "Fkbp5", "Uap1", "Xrcc5", "Elovl5", "Zmiz1", "Vapa", "Zbtb10", "Ptpn21", "Xrcc6", "B4galt1", "Cdc14b", "Gnai3")
86	8_v_1	HALLMARK_PI3K_AKT_MTOR_SIGNALING	0.0533311	0.0656307	0.00863149	0.591825	1.23319	105	c("Plcb1", "Cab39l", "Mapkap1", "Nck1", "Acaca", "Rptor", "Gsk3b", "Mapk1", "Mapk8", "Map2k6", "Cab39", "Rps6ka3", "Raf1", "Ube2d3", "Smad2", "Them4", "Tbk1", "Pikfyve", "Grb2", "Slc2a1", "Atf1", "Eif4e", "Ptpn11", "Cltc", "Pten", "Actr2", "Cdkn1b", "Ube2n", "Ppp2r1b", "Nod1", "Arf1", "Actr3", "Ripk1", "Sqstm1", "Prkar2a", "Ywhab", "Dusp3", "Ecsit", "Rps6ka1", "Map3k7", "Ralb", "Rac1", "Pdk1", "M…
87	8_v_1	HALLMARK_INTERFERON_GAMMA_RESPONSE	4.54727930892896e-08	1.2867172319409336e-06	0.719513	-0.511697	-1.80691	185	c("Oas2", "Rnf213", "Ifi27", "Ddx60", "Tapbp", "Txnip", "Trafd1", "Rbck1", "Rsad2", "Helz2", "Tap1", "Stat1", "Ifi44", "Parp14", "Parp12", "Herc6", "Irf1", "Isg15", "Btg1", "Psmb8", "Nfkbia", "Sectm1a", "Dhx58", "Casp4", "Usp18", "Irf7", "Bst2", "Rtp4", "Zbp1", "Irf9", "Cmpk2", "Psmb10", "Stat2", "Irf5", "Ifitm3", "Cd274", "H2-Aa", "Oasl1", "Cxcl10", "Ifit3", "Ddx58", "Ifit2", "Bank1", "Oas3", "X…
88	9_v_1	HALLMARK_EPITHELIAL_MESENCHYMAL_TRANSITION	0.00649718	0.0122609	0.304115	-0.380244	-1.27566	193	c("Ntm", "Vegfa", "Col7a1", "Sat1", "Gadd45a", "Pdlim4", "Anpep", "Cd44", "Flna", "Lrp1", "Cxcl5", "Dst", "Col16a1", "Mcm7", "Col1a2", "Sdc4", "Fap", "Fn1", "Col6a3", "Eno2", "Col1a1", "Rgs4", "Gpc1", "Bmp1", "Prrx1", "Col4a1", "Lamc2", "Thy1", "Cthrc1", "Col5a2", "Comp", "Sgcb", "Tgfbi", "Igfbp4", "Serpine1", "Gas1", "Wipf1", "Col6a2", "Thbs1", "Cxcl15", "Tagln", "Cdh6", "Emp3", "Itgb3", "Dpysl3…
89	9_v_1	HALLMARK_INTERFERON_ALPHA_RESPONSE	1.76367089239513e-05	8.201069649637354e-05	0.57561	-0.580229	-1.7879	92	c("Ifi27", "Uba7", "Trafd1", "Txnip", "Ddx60", "Rsad2", "Tap1", "Helz2", "Irf9", "Rtp4", "Cmpk2", "Trim21", "Ifi44", "Parp12", "Dhx58", "C1s1", "Irf1", "Gbp3", "Irf7", "Parp14", "Herc6", "Isg15", "Ifit3", "Trim25", "Ifitm1", "Ogfr", "Stat2", "Sp110", "Batf2", "Bst2", "Oasl1", "Cxcl10", "Psmb9", "Adar", "Usp18", "Psmb8", "Ifih1")
90	9_v_1	HALLMARK_INTERFERON_GAMMA_RESPONSE	3.03473967797599e-07	3.640723402698375e-06	0.674963	-0.517482	-1.72803	185	c("Oas2", "Ifi27", "Sectm1a", "Rbck1", "Trafd1", "Txnip", "Ddx60", "Rsad2", "Tap1", "Helz2", "Rnf213", "Irf9", "Rtp4", "Cmpk2", "Trim21", "Tapbp", "Ifi44", "Parp12", "Dhx58", "Cd274", "C1s1", "Irf1", "Gbp3", "Irf7", "Parp14", "Pfkp", "Btg1", "Herc6", "Ido1", "Il10ra", "Isg15", "Stat1", "Pim1", "Ifit3", "Trim25", "Bank1", "Icam1", "Zbp1", "H2-Aa", "Irf5", "Socs3", "Ogfr", "Nfkbia", "Stat2", "Sp110…
91	9_v_1	HALLMARK_PI3K_AKT_MTOR_SIGNALING	0.000584867	0.00151091	0.0858109	0.651339	1.45684	105	c("Plcb1", "Gsk3b", "Mapkap1", "Cab39l", "Cab39", "Rptor", "Nck1", "Mapk1", "Acaca", "Ube2d3", "Pik3r3", "Smad2", "Mapk8", "Pikfyve", "Grb2", "Rps6ka3", "Raf1", "Prkaa2", "Cltc", "Itpr2", "Actr2", "Ptpn11", "Ywhab", "Ralb", "Pten", "Atf1", "Cdkn1b", "Map2k6", "Mapk10", "Ube2n", "Eif4e", "Actr3", "Trib3", "Dusp3", "Arf1", "Prkar2a", "Map3k7", "Sqstm1", "Camk4", "Them4", "Ecsit", "Nod1", "Ripk1", "…
92	9_v_1	HALLMARK_ANDROGEN_RESPONSE	0.0010802	0.00270475	0.0633249	0.651041	1.4473	95	c("Stk39", "Ell2", "Sec24d", "Arid5b", "Pdlim5", "Lifr", "Ank", "Pias1", "Map7", "Bmpr1b", "Rab4a", "Slc38a2", "Uap1", "Sgk1", "B4galt1", "Tpd52", "Elovl5", "Lman1", "Zmiz1", "Fkbp5", "Cdk6", "Ptpn21", "Rps6ka3", "Hpgd", "Slc26a2", "Appbp2", "Krt8", "Zbtb10", "Xrcc6", "Xrcc5", "Vapa", "B2m", "Gnai3", "Sord", "Herc3", "Ngly1", "Dbi", "Iqgap2", "Homer2", "Itgav", "Ube2j1", "Gsr", "Plpp1", "Cdc14b",…

## Sheet: Table S2
Supplement Table 2: Crispr Screen Gene Summary
Gene	sgRNA	DKO_EPZ_over_postPuro|beta	DKO_EPZ_over_postPuro|z	DKO_EPZ_over_postPuro|p-value	DKO_EPZ_over_postPuro|fdr	DKO_EPZ_over_postPuro|wald-p-value	DKO_EPZ_over_postPuro|wald-fdr	DKO_DMSO_over_postPuro|beta	DKO_DMSO_over_postPuro|z	DKO_DMSO_over_postPuro|p-value	DKO_DMSO_over_postPuro|fdr	DKO_DMSO_over_postPuro|wald-p-value	DKO_DMSO_over_postPuro|wald-fdr
Ppp2r2b	4	0.4166	1.4209	0.072738	0.43129	0.15535	0.62105	0.37899	1.2928	0.13205	0.56679	0.19606	0.59683
Pkhd1	4	0.30018	0.99681	0.18659	0.64796	0.31886	0.74069	0.19355	0.64282	0.4385	0.86112	0.52034	0.7957
Aqp5	4	-0.078718	-0.48899	0.79946	0.97368	0.62485	0.87351	0.023218	0.14432	0.92154	0.99297	0.88525	0.95954
NO_SITE_621	1	-0.85022	-1.9914	0.20911	0.68139	0.046442	0.35392	-0.54833	-1.2882	0.34432	0.80947	0.19768	0.59837
1700001L19Rik	4	0.52828	1.0481	0.02621	0.24704	0.29461	0.72933	0.41002	0.81167	0.10493	0.51598	0.41698	0.73991
Oat	4	0.16908	0.88898	0.44583	0.86873	0.37402	0.77023	-0.071629	-0.37663	0.80098	0.97603	0.70645	0.88622
Meis3	4	0.0082561	0.040137	0.92913	0.98975	0.96798	0.99188	0.014566	0.070857	0.94767	0.99536	0.94351	0.98027
Kcnd1	4	0.03544	0.16653	0.84322	0.97888	0.86774	0.96368	0.20648	0.97196	0.40944	0.84672	0.33107	0.68911
Kctd5	4	1.8984	1.2379	0	0	0.21574	0.6758	1.1062	0.72124	0.00034658	0.016032	0.47076	0.77095
Klf16	4	-0.74386	-3.2302	0.029156	0.26444	0.0012372	0.027183	-0.82557	-3.5887	0.020275	0.20508	0.00033229	0.0087759
Esp1	4	-0.17224	-0.73885	0.5563	0.91395	0.46	0.80706	-0.042603	-0.1832	0.88494	0.99047	0.85464	0.94785
Flt4	4	0.33707	0.86184	0.14153	0.5809	0.38878	0.7801	0.49407	1.2636	0.056059	0.37616	0.20637	0.6021
Mpeg1	4	0.042513	0.44753	0.82078	0.97489	0.65449	0.88586	0.0045195	0.047595	0.97864	0.99784	0.96204	0.98663
Olfr222	4	-0.16267	-1.0549	0.57761	0.91901	0.29147	0.72704	-0.059582	-0.38665	0.83711	0.98206	0.69902	0.88249
Zic4	4	0.034115	0.23116	0.84733	0.9799	0.81719	0.94458	0.18346	1.2439	0.4625	0.87531	0.21355	0.60485
Olfr582	4	0.016132	0.084212	0.90517	0.98878	0.93289	0.98198	0.29266	1.5295	0.24252	0.72654	0.12614	0.52765
Slc10a7	4	-0.15797	-0.7725	0.58874	0.92212	0.43982	0.80028	0.0018565	0.009089	0.98635	0.99847	0.99275	0.99737
Gm5460	4	0.015496	0.066615	0.90729	0.98878	0.94689	0.98609	0.087328	0.3757	0.72729	0.96151	0.70714	0.88644
Dcdc2c	4	-0.097859	-0.53394	0.74514	0.96187	0.59338	0.86304	-0.1685	-0.91988	0.55534	0.91435	0.35764	0.70414
Gtf2b	4	-0.6103	-1.9698	0.06208	0.39679	0.048864	0.36451	-0.78577	-2.5263	0.025647	0.23804	0.011527	0.12677
Vmn2r84	4	-0.26412	-0.82342	0.36542	0.82061	0.41027	0.78844	0.10301	0.32202	0.68002	0.95417	0.74744	0.90386
Zscan12	4	0.17321	0.84546	0.43539	0.86411	0.39785	0.78274	0.10748	0.52476	0.66746	0.94988	0.59975	0.83534
Siglech	4	0.3021	1.5682	0.1833	0.64301	0.11684	0.56403	0.11866	0.61611	0.63497	0.93786	0.53782	0.80455
Iqsec1	4	0.062849	0.69077	0.75744	0.96618	0.48971	0.81814	-0.066632	-0.73252	0.81662	0.9803	0.46385	0.76706
Arid4b	4	0.16694	0.95124	0.45124	0.87077	0.34148	0.75417	0.1497	0.85346	0.54789	0.91162	0.3934	0.72514
Shbg	4	-0.035171	-0.31081	0.92804	0.98966	0.75595	0.92464	-0.16904	-1.4947	0.55413	0.91413	0.13499	0.53808
Skiv2l2	4	-1.4785	-3.614	0.00017329	0.008316	0.00030146	0.0097386	-0.51894	-1.2908	0.11008	0.52652	0.19678	0.59762
Lrrc72	4	0.19046	0.95023	0.39176	0.84058	0.34199	0.75435	0.27218	1.3587	0.27756	0.75661	0.17426	0.58101
Col9a2	4	0.079485	0.39113	0.70433	0.9521	0.6957	0.90001	0.035516	0.17483	0.88537	0.99047	0.86121	0.95042
Rpl7a-ps7	1	-1.9161	-2.4513	0.059048	0.38788	0.014233	0.16177	-1.8655	-2.4151	0.067409	0.41482	0.015733	0.1568
Plscr2	4	0.23421	0.85239	0.29697	0.76821	0.394	0.78117	0.17441	0.63492	0.48486	0.88364	0.52548	0.79773
Rbp1	4	0.44231	2.161	0.057878	0.38754	0.030699	0.2736	0.26548	1.2971	0.28826	0.76659	0.19461	0.59547
Atp5e	4	-0.11605	-0.45929	0.69484	0.94748	0.64603	0.88284	-0.23277	-0.92192	0.42347	0.85272	0.35657	0.70325
Pcp4	4	0.089064	0.39404	0.67275	0.94048	0.69355	0.89888	0.17063	0.75554	0.4937	0.88637	0.44993	0.75747
LOC102640226	1	-0.34667	-0.63068	0.48018	0.88474	0.52825	0.83441	-0.46797	-0.85405	0.39423	0.83755	0.39308	0.72483
Slc35b2	4	-0.23275	-1.5408	0.42464	0.85927	0.12337	0.57618	-0.18589	-1.2323	0.51618	0.89674	0.21783	0.6072
Gar1	4	-0.6029	-1.4487	0.06481	0.40454	0.14743	0.61226	-0.54976	-1.3249	0.092232	0.48364	0.1852	0.58691
Nap1l3	4	-0.073306	-0.49276	0.8151	0.97472	0.62218	0.87281	0.20356	1.3692	0.41515	0.84837	0.17093	0.57707
Zfp442	8	-0.23626	-1.36	0.26829	0.7448	0.17382	0.63646	-0.18508	-1.0673	0.38305	0.8326	0.28585	0.65802
Ldhb	4	0.01512	0.062059	0.90837	0.98878	0.95052	0.98726	0.43146	1.7725	0.089546	0.47529	0.076314	0.43679
Mrpl51	4	-0.74495	-3.285	0.029026	0.26388	0.0010199	0.02359	-0.43137	-1.9085	0.17186	0.64077	0.056326	0.37297
Ctbp1	4	0.24689	0.80109	0.27232	0.74827	0.42308	0.79333	0.32981	1.0704	0.18984	0.66692	0.28443	0.65679
Ctss	4	0.25168	1.4947	0.26387	0.74033	0.13499	0.59339	0.22435	1.3328	0.36984	0.82547	0.18261	0.58489
Serpinb12	4	0.20002	1.2065	0.36815	0.82235	0.22764	0.68507	0.019143	0.11547	0.93454	0.99424	0.90807	0.96608
Zbtb10	4	0.2087	0.96792	0.34857	0.80957	0.33308	0.74966	0.03031	0.14061	0.90045	0.99236	0.88818	0.95973
Esp23	4	0.018184	0.20729	0.89798	0.98764	0.83579	0.95214	0.020945	0.23884	0.92926	0.99297	0.81123	0.92977
Adipor2	4	0.35709	0.99256	0.11892	0.53488	0.32092	0.7416	0.61321	1.7062	0.021834	0.21687	0.087966	0.46356
Cdk11b	4	-0.55949	-1.967	0.082312	0.45949	0.049181	0.36558	-0.49486	-1.7444	0.12485	0.55545	0.081091	0.45014
NO_SITE_586	1	-0.34558	-0.7814	0.481	0.88527	0.43457	0.79884	-0.36086	-0.81639	0.4846	0.88352	0.41428	0.73842
Rab38	4	0.24103	1.3515	0.2835	0.76003	0.17653	0.63991	0.10124	0.56786	0.68522	0.95489	0.57013	0.82085
Myo5b	4	0.12431	0.43575	0.57072	0.91862	0.66302	0.88861	0.34997	1.2275	0.16493	0.6303	0.21963	0.60818
Bcl2l12	4	0.25453	1.3653	0.2595	0.73787	0.17215	0.63411	0.065946	0.35383	0.79114	0.9743	0.72346	0.89345
Zfhx2	4	0.61517	1.2095	0.011957	0.1509	0.22645	0.68398	0.56081	1.1028	0.033445	0.28165	0.27011	0.64778
Slc6a9	4	0.24004	1.5486	0.2851	0.76119	0.12147	0.57299	0.28003	1.8076	0.26374	0.74718	0.070673	0.42391
Ipo7	4	-1.4464	-4.0363	0.00025993	0.010949	5.4292e-05	0.0028226	-1.1392	-3.202	0.0029892	0.061552	0.0013646	0.025301
Ndufb3	4	-0.32279	-1.7957	0.27869	0.75452	0.072535	0.45822	-0.12366	-0.68883	0.66196	0.94831	0.49093	0.78178
Zfp879	4	-0.044669	-0.26911	0.8988	0.98764	0.78785	0.93506	-0.20484	-1.2345	0.47689	0.88135	0.21703	0.60634
Mterf3	4	-0.67894	-2.9126	0.041589	0.3228	0.0035843	0.057898	-0.41462	-1.7836	0.18667	0.66415	0.074488	0.43307
Opn1mw	4	0.0034659	0.018418	0.9455	0.992	0.98531	0.99622	0.070679	0.37581	0.77681	0.97203	0.70706	0.88643
Lect1	4	0.21929	0.70375	0.32682	0.79421	0.48159	0.81437	0.23303	0.74841	0.35026	0.81487	0.45421	0.7608
Tmem213	4	0.50728	1.8203	0.032188	0.27953	0.068714	0.44405	-0.032957	-0.11819	0.91353	0.99297	0.90592	0.96522
Gm15531	1	-4.3308	-4.5042	0.0027726	0.058235	6.6613e-06	0.00065993	-2.1953	-2.3201	0.046268	0.34067	0.020335	0.19081
Dll3	4	0.27633	1.2685	0.22298	0.6979	0.20461	0.66495	0.14423	0.6623	0.5615	0.91545	0.50778	0.79122
Mcemp1	4	-0.09413	-0.39763	0.75501	0.96501	0.6909	0.89888	-0.16898	-0.71424	0.55417	0.91413	0.47508	0.77331
Pim1	4	0.012054	0.038614	0.91799	0.98935	0.9692	0.99193	0.1309	0.41994	0.5994	0.92785	0.67453	0.8704
Car1	4	0.11462	0.57378	0.59758	0.92348	0.56612	0.85248	-0.088401	-0.44264	0.75527	0.96772	0.65803	0.86239
BC003965	4	0.095216	0.69496	0.65529	0.93813	0.48708	0.81698	0.1936	1.4145	0.43837	0.86112	0.15723	0.56251
Bcar3	4	-0.060858	-0.23338	0.84989	0.9799	0.81547	0.94425	0.010847	0.041645	0.95971	0.99711	0.96678	0.98854
LOC105243593	1	-1.9181	-2.5234	0.058831	0.38788	0.011623	0.14106	-3.6418	-4.8697	0.013646	0.16104	1.1176e-06	0.00011944
Elmo3	4	0.11674	0.584	0.59204	0.92232	0.55922	0.84945	0.056725	0.28391	0.81891	0.98045	0.77648	0.91509
Nhsl2	4	0.12096	0.63857	0.57917	0.91947	0.5231	0.83303	0.33398	1.7639	0.1842	0.66025	0.07775	0.44085
Gm2959	3	-0.70442	-1.4991	0.067106	0.41355	0.13385	0.59203	-1.2087	-2.5625	0.006455	0.10198	0.010392	0.11782
Cmtm1	4	0.017895	0.12632	0.89893	0.98764	0.89948	0.97234	0.066137	0.4672	0.7905	0.97427	0.64036	0.85501
Trex1	4	0.18188	0.81201	0.4139	0.85548	0.41679	0.7915	0.25248	1.1277	0.31161	0.78578	0.25943	0.63811
Gm2056	9	-0.47872	-2.7727	0.025213	0.24051	0.0055592	0.079163	-0.6932	-4.0051	0.0029026	0.061355	6.1996e-05	0.0025878
Rpl10-ps3	1	0.28958	0.4596	0.4953	0.88942	0.6458	0.88267	-3.9245	-6.2505	0.010441	0.13717	4.0902e-10	2.0088e-07
C330018D20Rik	4	0.39229	0.79548	0.087727	0.46929	0.42633	0.79437	0.083141	0.16833	0.74042	0.96445	0.86633	0.95244
Olfr583	4	0.1568	0.82882	0.47849	0.88347	0.40721	0.78822	0.11638	0.61542	0.64129	0.94015	0.53828	0.8047
Gm10487	15	-0.66869	-3.2976	0.00021661	0.0097847	0.00097504	0.02278	-0.31594	-1.5831	0.047438	0.3451	0.1134	0.50842
Tldc1	4	0.13038	0.65817	0.55235	0.91371	0.51043	0.82775	0.094082	0.4751	0.7074	0.95793	0.63472	0.8526
Tmem38b	4	-0.4922	-2.4677	0.11775	0.53267	0.013599	0.15839	-0.57994	-2.909	0.078456	0.44677	0.0036255	0.052435
NO_SITE_482	1	0.79274	0.51692	0.075337	0.4395	0.60521	0.86689	1.3298	0.86727	0.017415	0.18733	0.3858	0.72063
Tcf3	4	-0.10179	-0.40838	0.73457	0.95954	0.683	0.89593	0.32116	1.2899	0.20119	0.67806	0.19709	0.59773
Cpxcr1	4	-0.12289	-0.35616	0.67578	0.9409	0.72172	0.91114	0.25678	0.7476	0.30451	0.78303	0.4547	0.76123
Qpct	4	-0.023943	-0.1654	0.96266	0.99556	0.86863	0.96381	0.09242	0.63882	0.71182	0.95847	0.52294	0.79679
LOC105245734	3	-1.6133	-3.7376	0.0012563	0.0338	0.0001858	0.0067969	-0.63412	-1.5017	0.098211	0.49901	0.13316	0.53587
Epb42	4	0.039256	0.25987	0.83018	0.97606	0.79496	0.9366	0.072342	0.47919	0.77135	0.97035	0.6318	0.85135
LOC108168637	4	0.11152	0.52449	0.6062	0.92657	0.59994	0.86455	0.38191	1.7986	0.12884	0.56378	0.072088	0.42601
Traf4	4	0.088795	0.49196	0.67348	0.94048	0.62275	0.87302	0.33994	1.8846	0.17645	0.64697	0.059487	0.3842
Ndufaf7	4	-0.2401	-1.6975	0.41013	0.85381	0.089608	0.50909	-0.25737	-1.8209	0.38141	0.83195	0.068625	0.41675
5430419D17Rik	4	0.0030214	0.021704	0.94767	0.99274	0.98268	0.99554	-0.091497	-0.65742	0.74739	0.96553	0.51091	0.79196
Nudt10	8	0.35536	1.5516	0.031278	0.27515	0.12076	0.57166	0.51544	2.2522	0.0068015	0.10601	0.02431	0.21616
Sec22a	4	0.21913	0.99309	0.32725	0.79439	0.32066	0.7416	0.22302	1.0112	0.37305	0.82794	0.31191	0.67362
F8a	4	-0.032517	-0.16833	0.9361	0.99097	0.86633	0.96327	0.097251	0.50373	0.69783	0.95648	0.61445	0.8432
Olfr1333	7	-0.13183	-0.89102	0.56921	0.91804	0.37292	0.76948	-0.006067	-0.041093	0.99996	0.99996	0.96722	0.98866
Pik3ap1	4	0.13654	0.61792	0.53442	0.90793	0.53663	0.83837	0.0003408	0.001542	0.9903	0.99856	0.99877	0.99948
C1galt1	4	0.74207	1.5004	0.0039856	0.073896	0.13352	0.592	0.94764	1.9164	0.0012563	0.034731	0.055311	0.36975
Olfr558	4	0.81898	1.6896	0.0016029	0.040615	0.091107	0.51432	0.7256	1.4972	0.008751	0.12362	0.13435	0.53739
Gm4027	8	-0.37829	-2.1568	0.082788	0.45951	0.03102	0.27519	-0.68093	-3.8664	0.0051553	0.087888	0.00011045	0.0039912
2310061N02Rik	4	-0.12077	-0.23971	0.68197	0.94269	0.81055	0.94211	-0.2829	-0.55841	0.34034	0.80667	0.57656	0.82386
Anxa9	4	0.38967	1.2777	0.089806	0.47579	0.20135	0.66216	0.39683	1.3019	0.11541	0.53943	0.19296	0.59484
Zadh2	4	0.27907	0.73734	0.21847	0.69115	0.46092	0.80775	0.49993	1.3222	0.054066	0.36782	0.18611	0.58864
Apex1	4	-0.10985	-0.56472	0.7126	0.95462	0.57227	0.85466	-0.35444	-1.8224	0.24754	0.73326	0.068401	0.41616
Olfr209	4	0.29231	0.94941	0.19742	0.66351	0.34241	0.75505	0.1407	0.45708	0.57228	0.91947	0.64761	0.85828
Dapl1	4	0.019176	0.10608	0.8946	0.98764	0.91552	0.97711	-0.027829	-0.15402	0.92791	0.99297	0.8776	0.95747
NO_SITE_687	1	0.27911	1.3507	0.51224	0.89773	0.17678	0.63999	-0.29504	-1.4278	0.5498	0.91162	0.15335	0.55904
Gm7819	1	-1.506	-1.9733	0.095525	0.48762	0.048464	0.36216	-1.2947	-1.7141	0.12927	0.56378	0.086517	0.46004
Gm14725	3	0.0034741	0.031006	0.95936	0.99434	0.97527	0.9931	-0.10348	-0.92412	0.74999	0.96683	0.35542	0.70289
Trpv5	4	0.24354	0.87205	0.27908	0.75504	0.38318	0.7778	0.48892	1.7517	0.058225	0.38565	0.079824	0.44647
NO_SITE_45	1	0.031803	0.12819	0.96001	0.99457	0.898	0.97189	0.31653	1.2763	0.48243	0.88255	0.20185	0.59872
Xkrx	4	0.3075	1.4882	0.17636	0.63313	0.13671	0.5948	0.20529	0.99374	0.41139	0.84672	0.32035	0.68041
Hgf	4	-0.069389	-0.30741	0.82559	0.97574	0.75853	0.92534	0.18274	0.81027	0.46471	0.87718	0.41779	0.74043
Plekhj1	4	0.23914	1.0188	0.28662	0.76211	0.30832	0.73459	0.20743	0.88398	0.4074	0.84523	0.37671	0.71558
Nup214	4	-0.47702	-1.4464	0.12815	0.55331	0.14806	0.6136	-0.68466	-2.0651	0.044925	0.33527	0.038915	0.29783
Ftcd	4	-0.15278	-0.84859	0.60135	0.92478	0.39611	0.78245	-0.076671	-0.42635	0.7882	0.97398	0.66985	0.86803
Vmn1r8	3	-0.046085	-0.33843	0.89993	0.98764	0.73504	0.91688	-0.2587	-1.9006	0.44479	0.86456	0.057358	0.37633
Fthl17-ps2	5	-0.25555	-0.72249	0.33683	0.79776	0.47	0.81028	-0.36994	-1.0446	0.18338	0.65909	0.29622	0.66456
Get4	4	-0.55485	-2.3409	0.084738	0.46257	0.019239	0.19616	-0.30724	-1.2997	0.30637	0.78368	0.19371	0.59547
Evc2	4	-0.046902	-0.21077	0.89118	0.98717	0.83306	0.95116	0.030801	0.13859	0.89884	0.99211	0.88978	0.96034
Cdk19	4	-0.038199	-0.20419	0.91786	0.98935	0.8382	0.95344	-0.29062	-1.5521	0.33003	0.79878	0.12064	0.51982
Tbx10	4	0.29802	1.2003	0.18971	0.65154	0.23002	0.68609	0.32751	1.3197	0.19265	0.66977	0.18694	0.58982
1700016C15Rik	4	0.10945	0.34522	0.61262	0.92882	0.72993	0.91444	0.50156	1.5839	0.053589	0.36565	0.11321	0.50842
Slc22a26	4	-0.10424	-0.65849	0.7269	0.95832	0.51022	0.82773	0.18582	1.1762	0.45696	0.87238	0.23951	0.62392
Ccdc182	4	0.15121	0.78689	0.49348	0.88911	0.43135	0.79731	0.20671	1.0764	0.40892	0.8464	0.28174	0.65583
Dlg5	4	-0.24937	-0.95299	0.39232	0.84073	0.34059	0.75378	-0.11549	-0.4419	0.68189	0.95447	0.65856	0.86239
Olfr435	4	0.37615	1.1222	0.10085	0.50021	0.26179	0.70845	0.56899	1.6985	0.030932	0.26682	0.089421	0.46479
LOC102632102	1	-1.4922	-2.0541	0.097128	0.49005	0.039964	0.32244	-1.6677	-2.3139	0.086427	0.46664	0.020672	0.19243
Fgf8	4	0.21841	0.56767	0.32842	0.79485	0.57026	0.85455	0.0018948	0.0049104	0.98631	0.99847	0.99608	0.9987
Gpsm1	4	0.42072	1.6961	0.070138	0.4228	0.089863	0.51003	-0.22954	-0.92454	0.42915	0.85596	0.35521	0.70271
Gm13769	8	0.11875	0.81476	0.43954	0.86704	0.41521	0.79109	0.15463	1.0616	0.3912	0.83755	0.28843	0.65957
Dnm1	4	0.19999	0.96076	0.36819	0.82235	0.33668	0.75208	0.22728	1.0922	0.36317	0.82176	0.27473	0.65092
Tmem117	4	-0.01634	-0.087919	0.98661	0.99895	0.92994	0.98058	-0.035475	-0.19094	0.9056	0.99297	0.84857	0.94526
Olfr355	4	0.22518	0.72851	0.31504	0.78548	0.4663	0.80852	0.53622	1.7361	0.041372	0.31993	0.082547	0.4541
Hnrnpd	4	-0.9203	-3.7421	0.010354	0.13736	0.00018248	0.0067503	-0.67282	-2.7464	0.047914	0.34649	0.0060258	0.077679
Gm34396	1	-0.15753	-0.44291	0.7146	0.95485	0.65783	0.88659	0.073942	0.208	0.90642	0.99297	0.83523	0.94065
Gtdc1	4	0.031486	0.20073	0.85569	0.98065	0.84091	0.95412	-0.32152	-2.0496	0.28757	0.76626	0.040406	0.3041
Efl1	4	-1.2709	-3.447	0.00086644	0.026178	0.00056692	0.01527	-0.98238	-2.6815	0.0076247	0.11282	0.0073284	0.089788
Gm12060	2	-0.44651	-0.91012	0.28744	0.76245	0.36276	0.76517	-0.16098	-0.331	0.66508	0.94959	0.74065	0.90015
Gm4705	1	-0.43994	-0.67111	0.39241	0.84073	0.50215	0.82329	-0.75398	-1.1609	0.25218	0.73674	0.24568	0.62896
Slc6a15	4	0.11468	0.79633	0.59745	0.92348	0.42584	0.79424	-0.15079	-1.047	0.59594	0.92677	0.29511	0.66387
Pde6d	4	0.11437	0.60303	0.59836	0.9237	0.54649	0.84337	0.022071	0.11641	0.92549	0.99297	0.90733	0.96577
2300003K06Rik	4	0.054572	0.31336	0.78404	0.97181	0.75401	0.92423	-0.00068965	-0.0039619	0.99359	0.99857	0.99684	0.99885
LOC665755	7	-0.49104	-2.4183	0.040246	0.3173	0.015593	0.17099	-0.33582	-1.6604	0.14842	0.59784	0.096841	0.48
NO_SITE_109	1	0.21325	0.51721	0.6176	0.9298	0.60501	0.86689	0.13306	0.32276	0.79136	0.9743	0.74688	0.90373
Aldh1a3	4	0.14696	1.0018	0.50526	0.89502	0.31646	0.73912	0.037666	0.25684	0.87809	0.98984	0.79731	0.92368
Cst10	4	0.087002	0.64903	0.67937	0.9417	0.51632	0.83066	0.1946	1.4523	0.43591	0.85986	0.14641	0.55212
Acp5	4	0.10544	0.41393	0.62392	0.92983	0.67892	0.89407	0.4943	1.9421	0.056059	0.37616	0.05213	0.35708
Fam210b	4	0.22823	1.3964	0.30919	0.78017	0.1626	0.62602	0.34627	2.1197	0.16948	0.63724	0.034035	0.27393
Mcoln1	4	-0.036299	-0.16982	0.92445	0.98943	0.86515	0.96303	0.077873	0.36456	0.75419	0.96766	0.71544	0.89027
Gm21596	3	-0.7204	-1.8391	0.06221	0.39679	0.065896	0.43262	-0.94414	-2.3891	0.024823	0.23397	0.016891	0.16535
Sqle	4	0.46248	2.3963	0.048304	0.35113	0.01656	0.17829	0.077495	0.40144	0.75545	0.96772	0.68809	0.87719
Gm21647	6	-0.051495	-0.26034	0.8673	0.98099	0.7946	0.9366	0.016864	0.085371	0.91929	0.99297	0.93197	0.97642
Sult1c2	4	0.095255	0.74582	0.65507	0.93813	0.45578	0.8055	0.067878	0.53163	0.78495	0.97335	0.59498	0.83302
Ugt2b38	5	0.19279	1.2654	0.34064	0.80227	0.20573	0.66635	0.045165	0.29643	0.83234	0.98179	0.7669	0.91097
Pdzd3	4	0.38872	1.5128	0.090759	0.47888	0.13032	0.5871	-0.081843	-0.31843	0.77403	0.97114	0.75016	0.90487
Olfr802	4	0.20244	0.75721	0.3633	0.82017	0.44893	0.80336	0.11685	0.43724	0.63986	0.93976	0.66194	0.86411
Zfp715	4	0.3587	1.165	0.11719	0.53267	0.24401	0.69641	0.42063	1.3666	0.096911	0.49623	0.17174	0.57788
Prdm5	4	0.2828	1.1526	0.21267	0.68504	0.24906	0.69846	0.3146	1.2828	0.20976	0.68798	0.19958	0.59837
Agpat3	4	-0.24388	-1.3099	0.40246	0.84801	0.19023	0.65533	0.084514	0.45482	0.73669	0.96411	0.64924	0.85921
Fpr-rs3	4	-0.079392	-0.45813	0.79738	0.97335	0.64686	0.88336	-0.025709	-0.14845	0.93441	0.99424	0.88199	0.95919
4930563D23Rik	4	0.15208	0.60994	0.49079	0.88823	0.5419	0.8407	0.39473	1.5844	0.1168	0.54068	0.1131	0.50842
Hook3	4	-0.11843	-0.4342	0.68791	0.94481	0.66414	0.88902	0.21362	0.78408	0.39367	0.83755	0.433	0.74845
Klf4	4	0.40664	1.5813	0.078673	0.44917	0.11382	0.56016	0.37849	1.4721	0.13248	0.56714	0.141	0.54547
Cebpe	4	-0.062968	-0.2313	0.84339	0.97888	0.81708	0.94458	0.15778	0.58027	0.52688	0.90209	0.56174	0.8163
Snd1	4	0.32364	0.92499	0.15579	0.59913	0.35497	0.76196	0.57462	1.6429	0.029416	0.25857	0.10041	0.4865
Olfr1116	4	-0.42744	-2.3589	0.16393	0.6123	0.018328	0.19031	0.016374	0.090698	0.94217	0.99489	0.92773	0.97512
Gm3476	8	-0.86871	-3.0859	0.00043322	0.016393	0.0020295	0.038056	-1.0416	-3.6905	0.00012997	0.011364	0.00022378	0.0065953
Ajuba	4	0.31089	1.2537	0.17194	0.62711	0.20994	0.66951	0.51818	2.0905	0.047654	0.3458	0.036569	0.28669
D430042O09Rik	4	0.17101	1.1665	0.44115	0.86785	0.24341	0.69543	0.12025	0.82049	0.63029	0.93719	0.41193	0.73665
Wnk3	4	0.17708	0.73786	0.42633	0.85927	0.4606	0.80754	-0.043807	-0.18254	0.8813	0.99029	0.85516	0.94786
Gm9252	1	-0.2176	-0.36528	0.63315	0.93113	0.7149	0.90938	-0.84349	-1.4168	0.22337	0.70557	0.15654	0.56173
Traip	4	-1.5236	-4.6467	0.00017329	0.008316	3.3725e-06	0.00040546	-1.704	-5.2095	0.00021661	0.012195	1.8935e-07	3.2138e-05
Ttc41	4	-0.014936	-0.065376	0.99099	0.99909	0.94787	0.98643	0.14084	0.61735	0.57198	0.91936	0.537	0.80387
Mtmr1	4	0.64892	1.5049	0.009011	0.12706	0.13234	0.59019	0.37278	0.86456	0.13902	0.581	0.38728	0.72158
Vmn1r87	4	0.42512	2.0599	0.067539	0.41485	0.039407	0.32108	0.14889	0.72154	0.5501	0.91162	0.47058	0.77081
Acsm2	4	-0.014523	-0.064584	0.99242	0.99909	0.94851	0.98643	0.019367	0.086199	0.93389	0.99414	0.93131	0.97642
Rpl17-ps4	1	0.92226	0.29202	0.047351	0.34787	0.77027	0.929	1.5726	0.49985	0.0095741	0.13015	0.61718	0.84444
Sox30	4	0.17615	0.65093	0.42802	0.85965	0.51509	0.82993	0.26777	0.99025	0.28493	0.76489	0.32205	0.68143
NO_SITE_736	1	1.5776	0.48808	0.0066283	0.10324	0.62549	0.87391	1.3214	0.40882	0.017589	0.18866	0.68267	0.87453
Gm15453	2	-0.19721	-0.73399	0.60036	0.92467	0.46296	0.80852	-0.45286	-1.6856	0.29151	0.77023	0.091876	0.4695
NO_SITE_500	1	0.052051	0.20508	0.92046	0.98935	0.83751	0.95289	0.29008	1.1437	0.52333	0.90028	0.25273	0.63382
Olfr516	4	0.13595	0.7896	0.53628	0.90908	0.42976	0.79633	0.0075087	0.043615	0.96972	0.99711	0.96521	0.98781
Nupr1	4	0.081341	0.48587	0.69865	0.9496	0.62706	0.87501	0.13733	0.82074	0.58103	0.92306	0.4118	0.73655
Psmd9	4	0.27402	1.4483	0.22657	0.70248	0.14754	0.61226	0.21768	1.1508	0.38548	0.83422	0.24981	0.63194
Ugp2	4	-0.023039	-0.1102	0.96573	0.99652	0.91225	0.97574	0.026338	0.12604	0.91206	0.99297	0.8997	0.9636
Pdcd2	4	-0.49206	-1.4133	0.11797	0.53267	0.15756	0.62303	0.090454	0.26375	0.71771	0.96011	0.79197	0.92127
Dpm3	4	0.28709	1.3995	0.20595	0.67701	0.16165	0.62572	0.17231	0.84015	0.48988	0.88574	0.40083	0.72928
NO_SITE_763	1	0.51934	1.0847	0.21262	0.68504	0.27804	0.72065	0.40469	0.84552	0.36503	0.82261	0.39782	0.72665
Naip2	4	0.12674	0.45614	0.56414	0.91619	0.64829	0.88356	0.15123	0.54459	0.54391	0.91064	0.58604	0.82833
Lmod1	4	0.18171	1.0483	0.41424	0.85581	0.29448	0.72933	0.17113	0.98768	0.49235	0.88624	0.32331	0.68224
Mettl1	4	-0.63668	-2.1494	0.053243	0.37096	0.031606	0.27892	-1.1405	-3.8272	0.0029892	0.061552	0.00012958	0.0043922
Gpatch11	4	0.061816	0.36308	0.76086	0.96652	0.71654	0.90968	-0.21825	-1.2817	0.45089	0.86784	0.19995	0.59837
Tuba1b	10	-1.954	-6.1183	0	0	9.4574e-10	1.2841e-06	-1.2305	-4.0721	0	0	4.6586e-05	0.0020756
Olfr159	4	0.22593	1.1752	0.31369	0.78383	0.23989	0.69201	0.2101	1.0933	0.40146	0.842	0.27426	0.65032
Mageb5	7	-0.028084	-0.16937	0.95131	0.99304	0.86551	0.96314	0.12434	0.75082	0.51397	0.89546	0.45276	0.75961
Gm10666	25	-0.35229	-2.4429	0.0056752	0.092645	0.01457	0.16382	-0.3078	-2.1399	0.013386	0.15887	0.032367	0.26381
Cd207	4	-0.01611	-0.060155	0.98722	0.99909	0.95203	0.98761	0.30836	1.1529	0.21817	0.69974	0.24896	0.63131
Zfp932	4	-0.42155	-2.0964	0.16891	0.62185	0.036048	0.30402	-0.38861	-1.9354	0.20929	0.68777	0.052938	0.36014
Kif18a	4	-1.0421	-4.0843	0.0047221	0.082202	4.4215e-05	0.0024832	-1.0295	-4.0446	0.0058485	0.095677	5.2413e-05	0.0022871
BC051628	4	0.19182	0.82917	0.38847	0.83765	0.40701	0.78822	0.16569	0.71636	0.50604	0.89086	0.47377	0.77253
Fam43a	4	0.064536	0.28904	0.75246	0.96453	0.77255	0.92976	0.1468	0.65804	0.55543	0.91435	0.51051	0.79185
Olfr48	4	-0.052241	-0.43887	0.87545	0.98422	0.66076	0.8878	0.091149	0.76623	0.71585	0.95987	0.44354	0.75442
Tmem55a	4	0.073417	0.41569	0.72343	0.95757	0.67764	0.89343	0.1568	0.88821	0.53017	0.90437	0.37443	0.71394
Secisbp2	4	-0.32426	-1.7685	0.27661	0.75241	0.076976	0.47319	-0.56265	-3.0687	0.086341	0.46664	0.00215	0.035424
Slc13a4	4	-0.014465	-0.10906	0.99272	0.99909	0.91315	0.97603	0.0023696	0.017877	0.98544	0.99847	0.98574	0.99477
Vmn1r45	4	-0.064891	-0.56841	0.83785	0.97781	0.56976	0.85432	-0.098137	-0.86002	0.72898	0.96215	0.38978	0.72284
Cc2d1b	4	0.2031	1.393	0.36174	0.81873	0.16363	0.62614	0.0090784	0.062278	0.96452	0.99711	0.95034	0.98274
Egfr	4	-0.78544	-2.4065	0.022657	0.22621	0.016106	0.17529	-0.61284	-1.8882	0.065849	0.41293	0.058997	0.38272
Olfr1	4	0.16769	0.72866	0.44964	0.86992	0.46621	0.80852	0.1751	0.76107	0.48365	0.88333	0.44661	0.75561
Kirrel2	4	-0.055181	-0.35567	0.86592	0.98099	0.72209	0.91126	-0.15864	-1.023	0.57752	0.92136	0.3063	0.66981
Gm8332	10	-0.47677	-3.0176	0.017329	0.18782	0.0025483	0.044978	-0.60382	-3.8179	0.0040723	0.076361	0.00013458	0.0044378
1700007K13Rik	4	0.25838	0.52703	0.25287	0.73173	0.59817	0.86448	0.56916	1.1618	0.030802	0.26609	0.24532	0.62896
Gab1	4	-0.19426	-1.0272	0.50509	0.89499	0.30434	0.73286	0.17572	0.93147	0.48191	0.88216	0.35161	0.6996
Plscr3	4	0.33644	1.6392	0.14214	0.58205	0.10117	0.53633	0.23444	1.1423	0.3471	0.81156	0.25331	0.63403
Ccdc138	4	0.088662	0.56742	0.67379	0.9405	0.57043	0.85461	0.1227	0.78568	0.62392	0.93618	0.43206	0.74823
Gm7285	1	-2.7602	-3.4815	0.027033	0.25253	0.00049867	0.013902	-3.8084	-4.8843	0.012	0.14861	1.0382e-06	0.00011304
Bloc1s5	4	0.4437	1.1213	0.057315	0.38605	0.26216	0.7086	0.52478	1.3268	0.045141	0.33559	0.18458	0.58659
Magea1	9	-0.025293	-0.19544	0.96985	0.99702	0.84505	0.95591	0.23425	1.8121	0.17251	0.64205	0.069975	0.42195
Zfp46	4	0.35939	1.2938	0.11667	0.53199	0.19575	0.65993	0.46132	1.6617	0.071914	0.42736	0.096575	0.47927
Micu3	4	0.32429	1.1132	0.15505	0.59849	0.26563	0.71123	0.20888	0.71677	0.40437	0.84373	0.47352	0.77237
Smug1	4	0.15631	0.71025	0.4794	0.8838	0.47755	0.81259	0.17525	0.79665	0.48295	0.88273	0.42565	0.74515
Ppil3	4	-0.081446	-0.34361	0.79162	0.97285	0.73114	0.91509	0.1024	0.43253	0.68171	0.95447	0.66535	0.86639
Zfp251	4	0.13445	0.78602	0.54087	0.91108	0.43186	0.79748	0.036746	0.2149	0.88147	0.99029	0.82985	0.93851
Kcne3	4	0.13442	0.76423	0.54092	0.91108	0.44473	0.8019	0.14399	0.8189	0.56232	0.91592	0.41284	0.73761
Sh3gl2	4	0.1762	0.84876	0.42785	0.8596	0.39601	0.78245	0.062388	0.30044	0.80185	0.97642	0.76384	0.91007
Tmem132b	4	0.022638	0.12498	0.88429	0.98647	0.90054	0.97248	0.02202	0.12165	0.92566	0.99297	0.90318	0.96447
Zfp800	4	-0.2607	-1.6119	0.37305	0.82489	0.10698	0.54803	0.06829	0.42292	0.78391	0.97322	0.67235	0.86863
Gpr55	4	0.16867	0.55724	0.44678	0.869	0.57736	0.85671	0.4494	1.4867	0.078673	0.44729	0.13709	0.54136
Pebp4	4	-0.041906	-0.21994	0.90759	0.98878	0.82591	0.94787	0.26668	1.4011	0.28675	0.76594	0.16118	0.56585
Rsph14	4	-0.10319	-0.64994	0.73015	0.95909	0.51573	0.83028	0.096423	0.60778	0.70013	0.95678	0.54334	0.80728
BC107364	4	0.21385	0.75412	0.33657	0.79756	0.45078	0.80336	0.38292	1.3514	0.12776	0.56231	0.17657	0.58247
Etnk1	4	0.20213	1.012	0.36412	0.82026	0.31154	0.73583	0.41867	2.0973	0.098297	0.49901	0.035964	0.28375
Olfr871	4	0.027706	0.18686	0.86717	0.98099	0.85177	0.95842	-0.11056	-0.74505	0.69579	0.95567	0.45624	0.76217
Plk3	4	-0.099853	-0.57787	0.73968	0.96035	0.56335	0.8517	-0.10838	-0.62769	0.70143	0.95705	0.53021	0.79971
Pot1a	4	-0.2854	-1.005	0.3328	0.7973	0.31489	0.73802	-0.51205	-1.8018	0.11454	0.53718	0.071585	0.42541
2210418O10Rik	5	-0.48874	-1.6728	0.083438	0.46011	0.094359	0.5207	-0.38657	-1.3285	0.16514	0.63052	0.18402	0.58625
Prl4a1	4	0.26768	1.5279	0.23723	0.71647	0.12653	0.58026	-0.037738	-0.21543	0.89871	0.99211	0.82943	0.93834
Btbd11	4	0.18565	0.76355	0.40389	0.84954	0.44513	0.8019	-0.10674	-0.43865	0.70545	0.95732	0.66092	0.86348
P2rx5	4	0.45866	1.4912	0.04982	0.35692	0.13592	0.5948	-0.010898	-0.03542	0.97531	0.99784	0.97174	0.99055
4930544G11Rik	4	0.071301	0.3036	0.73088	0.95909	0.76143	0.92654	0.31264	1.3319	0.21223	0.69192	0.18289	0.58515
Slc6a20a	4	0.13304	0.83412	0.54525	0.91176	0.40421	0.78712	0.060889	0.38193	0.80596	0.97752	0.70251	0.88488
Hacd2	4	-0.30887	-1.5889	0.29719	0.76837	0.11207	0.55731	-0.69148	-3.5582	0.042672	0.32498	0.00037342	0.0095561
Cdkn2aipnl	4	0.31735	1.1936	0.16332	0.61191	0.23264	0.68752	0.47225	1.7785	0.066499	0.41482	0.075316	0.43525
Olfr1501	4	-0.088679	-0.57082	0.77152	0.9692	0.56812	0.85372	-0.14016	-0.90265	0.62137	0.93605	0.36671	0.70928
Rbfox2	4	0.038921	0.16551	0.83156	0.97647	0.86855	0.96381	-0.049761	-0.21172	0.86393	0.98736	0.83232	0.93944
Krtap9-1	12	-0.092903	-0.80773	0.63254	0.93113	0.41925	0.79194	-0.2514	-2.1861	0.15431	0.60962	0.02881	0.2444
Gsdma	4	0.0060976	0.039447	0.93653	0.99097	0.96853	0.99193	-0.079504	-0.51439	0.78057	0.973	0.60698	0.83964
Olfr705	4	0.14917	0.51221	0.49872	0.89109	0.6085	0.86716	0.18346	0.63029	0.4625	0.87531	0.5285	0.79928
Il1f9	4	0.0067154	0.030279	0.93432	0.9909	0.97584	0.9931	0.28227	1.2735	0.25993	0.7446	0.20286	0.59918
Gm4216	17	-0.28531	-1.773	0.057921	0.38754	0.076227	0.46984	-0.30144	-1.8751	0.044795	0.33474	0.060784	0.38931
Zfp287	4	0.27567	0.86383	0.22397	0.69878	0.38768	0.77984	0.34243	1.0739	0.17402	0.64354	0.28287	0.65633
Vmo1	4	-0.27708	-1.1975	0.34458	0.80561	0.23112	0.6874	-0.84647	-3.6537	0.017415	0.18733	0.00025849	0.0072764
Dnajc13	4	0.69586	0.97134	0.0058051	0.094366	0.33138	0.74796	1.1494	1.6051	0.00025993	0.012821	0.10846	0.50163
Copa	4	-0.93615	-2.192	0.0092709	0.12993	0.02838	0.25985	-1.2985	-3.0447	0.0011264	0.032704	0.0023293	0.037784
Emc2	4	-0.8906	-3.0094	0.012217	0.15301	0.0026179	0.046059	-0.92529	-3.129	0.010701	0.13892	0.001754	0.030396
Ggt1	4	0.1834	0.61811	0.41009	0.85379	0.5365	0.83837	0.17495	0.58983	0.48378	0.88333	0.55531	0.81289
Anapc16	4	0.21449	1.1845	0.33579	0.79752	0.23622	0.68871	0.13315	0.73528	0.59329	0.92558	0.46217	0.7666
Wdfy1	4	0.094409	0.49242	0.65776	0.93821	0.62243	0.87292	0.27359	1.4285	0.2747	0.75443	0.15316	0.55895
Siah1a	4	-0.13297	-0.57518	0.64879	0.93618	0.56517	0.85203	-0.14697	-0.63613	0.60512	0.93034	0.52469	0.79754
Pak7	4	0.17294	0.70123	0.43634	0.86514	0.48316	0.81508	0.14184	0.57546	0.56903	0.9184	0.56498	0.81786
Speg	4	0.075948	0.17099	0.71533	0.95487	0.86423	0.96287	0.1489	0.33567	0.55006	0.91162	0.73712	0.89849
Cthrc1	4	0.27647	1.6008	0.22272	0.69746	0.10943	0.55406	0.26784	1.5511	0.2848	0.76489	0.12088	0.52014
1110017D15Rik	4	0.37788	0.90029	0.099164	0.49492	0.36797	0.76686	-0.14187	-0.33779	0.61699	0.93402	0.73552	0.89784
Pxmp2	4	0.38315	1.739	0.094572	0.48652	0.082036	0.48877	0.023119	0.10493	0.9218	0.99297	0.91643	0.96985
Vmn1r85	4	0.30951	1.3437	0.17346	0.62996	0.17904	0.6434	0.22791	0.98994	0.36187	0.82093	0.3222	0.68146
Dpysl4	4	0.092646	0.29833	0.6627	0.93922	0.76545	0.92773	0.23001	0.74111	0.35667	0.81792	0.45863	0.76406
NO_SITE_26	1	0.22218	0.62852	0.60382	0.92551	0.52966	0.83501	0.22647	0.64072	0.62466	0.93654	0.52171	0.79583
Rab15	4	0.16725	0.72256	0.45059	0.87067	0.46995	0.81028	0.23172	1.0016	0.35281	0.81611	0.31654	0.67741
Esm1	4	0.15814	0.59829	0.47481	0.8817	0.54965	0.8442	-0.11693	-0.44234	0.67825	0.95394	0.65824	0.86239
Vgf	4	0.3042	1.2455	0.18052	0.6394	0.21294	0.67243	0.30609	1.2536	0.22142	0.70399	0.20998	0.60432
Rab2b	4	0.14249	0.90184	0.51744	0.90002	0.36714	0.76605	0.12698	0.80397	0.6121	0.93276	0.42142	0.74294
Gm4141	17	-0.25085	-1.4882	0.093359	0.48308	0.1367	0.5948	-0.3104	-1.8406	0.039466	0.31113	0.065679	0.40733
Nxpe2	4	0.29898	1.4139	0.18806	0.64999	0.1574	0.62288	0.254	1.2017	0.3091	0.78437	0.2295	0.61619
NO_SITE_938	1	-0.15902	-1.8115	0.71265	0.95462	0.070068	0.4489	0.067153	0.76548	0.91795	0.99297	0.44398	0.75444
Nutm2	4	0.07257	0.3023	0.72621	0.958	0.76242	0.9267	0.39055	1.6286	0.12113	0.54964	0.1034	0.49271
Nup62cl	4	-0.20514	-1.4623	0.48109	0.88528	0.14367	0.60727	0.098651	0.70407	0.69337	0.95489	0.48139	0.7768
Fbxo44	4	0.23902	0.76814	0.28714	0.76228	0.44241	0.80125	0.54226	1.7442	0.039856	0.31335	0.081123	0.45014
NO_SITE_880	1	-0.1372	-0.36964	0.74449	0.96187	0.71165	0.90807	0.10486	0.28274	0.84803	0.98376	0.77737	0.91528
Phf11a	5	-0.19477	-0.95088	0.46419	0.87856	0.34166	0.7542	0.099572	0.48692	0.65715	0.94688	0.62631	0.84875
Papln	4	0.13661	0.60018	0.53425	0.9077	0.54838	0.84374	0.074699	0.32831	0.76429	0.96982	0.74268	0.9015
Smarcb1	4	-0.53974	-1.5975	0.091453	0.47966	0.11016	0.55443	-1.6513	-4.8192	0.00021661	0.012195	1.4417e-06	0.0001466
Arl9	4	0.25922	0.92411	0.25148	0.73001	0.35543	0.76204	0.44677	1.5935	0.080059	0.44931	0.11104	0.50597
Pnrc2	4	-0.18605	-0.94289	0.52394	0.90252	0.34574	0.75664	0.13814	0.70112	0.57839	0.92178	0.48323	0.77799
Vmn1r103	16	-0.5314	-3.3902	0.0011264	0.031363	0.00069849	0.017652	-0.35486	-2.2786	0.024087	0.22994	0.022692	0.20598
Rgp1	4	-0.75623	-2.8172	0.027293	0.25371	0.0048438	0.071764	-1.1536	-4.289	0.0027293	0.058605	1.7948e-05	0.0010179
Tlr4	4	0.35457	1.2335	0.12117	0.53902	0.21739	0.67628	0.40296	1.4026	0.11004	0.52652	0.16075	0.56562
Trmt1	4	0.030552	0.1502	0.85873	0.98099	0.88061	0.96639	-0.18676	-0.9172	0.51445	0.89596	0.35904	0.70473
Igf2r	4	0.38023	1.4023	0.097258	0.49017	0.16081	0.6253	0.51085	1.8847	0.049907	0.35305	0.059464	0.3842
Cr2	4	0.23714	0.36992	0.29134	0.7649	0.71144	0.90803	0.21252	0.33142	0.39566	0.83766	0.74033	0.90008
LOC108168591	4	0.11634	0.56367	0.59312	0.92262	0.57298	0.85484	0.2651	1.2853	0.289	0.76731	0.19869	0.59837
Gm41099	1	0.32128	0.59419	0.44834	0.86989	0.55239	0.84498	-0.93531	-1.7275	0.19941	0.67684	0.084082	0.45572
Gm13306	11	-0.3041	-2.3466	0.099121	0.49492	0.018946	0.19402	0.027449	0.21258	0.83776	0.98217	0.83165	0.93911
C77370	4	0.15597	0.68288	0.48092	0.88527	0.49468	0.81982	-0.013376	-0.058501	0.96794	0.99711	0.95335	0.98392
Olfr67	4	0.23019	0.98021	0.30481	0.77566	0.32698	0.74552	0.35184	1.4989	0.16293	0.62569	0.1339	0.5363
Upk1b	4	0.065225	0.46661	0.75038	0.96378	0.64078	0.88066	-0.031296	-0.22393	0.91769	0.99297	0.82281	0.93536
Oc90	4	0.11914	0.70845	0.5855	0.92212	0.47867	0.81271	-0.19762	-1.1754	0.49222	0.88624	0.23985	0.6244
Tnfrsf8	4	0.30333	1.512	0.182	0.64167	0.13053	0.58732	0.15209	0.75815	0.54217	0.91038	0.44836	0.75646
Man2a2	4	0.70123	1.7279	0.0055452	0.091233	0.083998	0.49383	0.45914	1.131	0.073084	0.43101	0.25804	0.63763
Gabra6	4	0.13662	1.3106	0.5342	0.9077	0.18998	0.65533	0.027695	0.26581	0.90824	0.99297	0.79038	0.92098
Iqch	4	-0.086583	-0.54187	0.7772	0.9704	0.58791	0.86043	-0.15313	-0.95879	0.59056	0.92543	0.33766	0.69186
Scgb2b17	8	-0.3771	-2.3292	0.083655	0.46053	0.019846	0.20084	-0.4136	-2.5557	0.06312	0.40348	0.010598	0.11933
Chdh	4	0.30652	1.1881	0.1774	0.63449	0.2348	0.68821	0.36158	1.402	0.15184	0.604	0.1609	0.56569
Sap30	4	0.19902	0.78297	0.37023	0.82284	0.43364	0.79817	0.27537	1.084	0.2718	0.7518	0.27835	0.65349
NO_SITE_766	1	-0.29119	-0.53098	0.54443	0.91176	0.59543	0.86381	0.70161	1.2829	0.12923	0.56378	0.19952	0.59837
Gspt2	4	0.035692	0.23156	0.84226	0.97881	0.81688	0.94458	0.073285	0.47566	0.76853	0.97019	0.63431	0.85236
Vmn2r114	5	-0.054278	-0.28643	0.87021	0.98215	0.77455	0.93071	-0.19052	-1.0057	0.47195	0.88001	0.31458	0.67556
Klhl36	4	0.077637	0.46437	0.71074	0.95454	0.64238	0.88153	-0.034843	-0.20844	0.90751	0.99297	0.83488	0.94052
LOC100861749	1	-3.3504	-3.8158	0.014729	0.17154	0.00013576	0.0054219	-3.8212	-4.4177	0.011784	0.14743	9.9748e-06	0.00063958
Gm20906	8	-0.12291	-0.70945	0.57631	0.91879	0.47804	0.81259	-0.024446	-0.14133	0.92969	0.99297	0.88761	0.95954
Asb4	4	0.46561	1.666	0.046874	0.34667	0.095706	0.52346	0.12816	0.45847	0.6082	0.9316	0.64662	0.85773
Ddt	4	0.36288	1.2514	0.11337	0.52896	0.21079	0.66981	0.11634	0.40094	0.64142	0.94015	0.68846	0.87742
Kcnmb1	4	0.22391	0.68531	0.31738	0.78683	0.49315	0.81894	0.41385	1.2677	0.10202	0.50941	0.2049	0.60062
Gm8660	16	-0.52088	-4.0415	0.0015163	0.03876	5.3119e-05	0.0027985	-0.44988	-3.5021	0.0045921	0.082298	0.00046155	0.011144
Mip	4	0.4365	1.5761	0.061344	0.39553	0.11501	0.56207	0.36266	1.3098	0.15028	0.6009	0.19026	0.59182
Zfp619	7	-0.20996	-1.0664	0.35459	0.81382	0.28625	0.72549	-0.504	-2.5542	0.03964	0.31207	0.010643	0.11967
Nepro	4	-0.82901	-2.3559	0.017372	0.18782	0.01848	0.19128	-0.84946	-2.4213	0.017069	0.18615	0.015465	0.15678
Cbx6	4	0.041589	0.17987	0.82286	0.97491	0.85725	0.96049	-0.017142	-0.07415	0.95681	0.99711	0.94089	0.97959
LOC100503733	5	-0.59609	-2.4012	0.039813	0.31483	0.01634	0.17654	-0.034708	-0.14126	0.90837	0.99297	0.88767	0.95954
Olfr1218	4	0.049333	0.27531	0.79942	0.97368	0.78308	0.93369	0.16295	0.90987	0.51371	0.89542	0.36289	0.70696
Ttc16	4	0.43228	1.7058	0.063423	0.40033	0.088042	0.50516	0.34066	1.3447	0.17571	0.64603	0.17873	0.58351
Gja10	4	0.080656	0.54699	0.7006	0.95032	0.58438	0.85865	-0.018358	-0.12454	0.95343	0.9962	0.90089	0.96371
Tmem242	4	-0.3994	-1.9926	0.18884	0.65016	0.046301	0.35354	-0.40132	-2.0037	0.19759	0.67671	0.045105	0.32844
Stk33	4	0.057916	0.25798	0.77286	0.96951	0.79642	0.93661	0.076879	0.34265	0.75748	0.96843	0.73186	0.89631
NO_SITE_864	1	0.65889	0.91067	0.12529	0.54781	0.36247	0.76507	0.39811	0.55027	0.37356	0.82818	0.58213	0.82654
Sos1	4	0.032888	0.12873	0.85076	0.9799	0.89757	0.97184	-0.19324	-0.75658	0.50093	0.88829	0.4493	0.75713
NO_SITE_900	1	0.3758	0.9104	0.36949	0.82284	0.36261	0.76516	0.13426	0.32527	0.78924	0.97418	0.74497	0.90289
Ttll12	4	0.080078	0.44839	0.70238	0.95127	0.65387	0.88584	0.12745	0.71405	0.61032	0.93205	0.47519	0.77333
Ptov1	4	0.21008	0.96735	0.34471	0.80561	0.33337	0.75024	0.37982	1.75	0.13105	0.56394	0.080126	0.44751
Mroh7	4	0.27139	0.86455	0.23078	0.70834	0.38728	0.77967	0.44145	1.4076	0.083395	0.4591	0.15926	0.56427
Cgref1	4	0.63533	1.8802	0.0098341	0.13424	0.060086	0.41365	0.32755	0.96829	0.19252	0.66977	0.3329	0.6892
Uqcrfs1	4	-0.10511	-0.49311	0.72491	0.95776	0.62193	0.87271	-0.37848	-1.7758	0.22103	0.70372	0.075759	0.43601
Olfr1212	4	0.17047	0.65573	0.44236	0.86799	0.512	0.82844	0.17589	0.67684	0.48157	0.88212	0.49851	0.7867
Zfand2a	4	0.15846	0.92397	0.4736	0.88078	0.3555	0.76204	0.21776	1.2703	0.38531	0.83422	0.20399	0.60018
Akap8l	4	0.23505	0.77973	0.29541	0.76733	0.43555	0.79892	0.2316	0.76877	0.35333	0.81657	0.44203	0.75378
Ntsr2	4	0.60294	1.4214	0.01369	0.16475	0.15521	0.6209	0.19387	0.45667	0.43772	0.86112	0.64791	0.85842
Dnajb6	4	0.50371	1.4171	0.033098	0.28433	0.15645	0.62202	0.33865	0.95268	0.17818	0.65028	0.34075	0.69343
Myf6	4	0.1057	0.60169	0.62332	0.9298	0.54738	0.84374	0.14549	0.82845	0.55855	0.91518	0.40741	0.73367
Akr1b10	4	-0.087947	-0.48259	0.77351	0.96955	0.62939	0.87583	0.15	0.82364	0.54703	0.91144	0.41014	0.73538
NO_SITE_832	1	0.32349	0.90466	0.44548	0.86873	0.36565	0.76562	0.37826	1.0582	0.39882	0.84019	0.28998	0.6601
Zfp42	4	0.29955	1.4823	0.18728	0.64929	0.13826	0.59766	0.11885	0.58831	0.63436	0.93786	0.55632	0.81348
Ly6g6f	4	0.24372	0.82487	0.27873	0.75454	0.40945	0.78822	0.2787	0.94377	0.2666	0.74849	0.34529	0.69637
Sfxn4	4	-0.019804	-0.12877	0.97617	0.99827	0.89754	0.97184	0.14399	0.93711	0.56232	0.91592	0.3487	0.69822
Ccser1	4	-0.23126	-0.90951	0.42741	0.85949	0.36308	0.76521	-0.51448	-2.0174	0.1129	0.53292	0.043655	0.32174
8030423J24Rik	4	0.39679	1.974	0.084521	0.46243	0.048387	0.36216	0.42062	2.0931	0.096911	0.49623	0.036337	0.28568
Sp4	4	-0.2353	-1.7532	0.41936	0.85898	0.079572	0.48266	-0.20504	-1.5288	0.47637	0.88067	0.1263	0.52788
Vps4a	4	-0.058575	-0.45782	0.85626	0.9807	0.64708	0.88344	-0.1021	-0.79834	0.71802	0.96011	0.42467	0.745
Ccdc84	4	-0.13257	-0.481	0.64979	0.93621	0.63052	0.87687	-0.56244	-2.0078	0.086471	0.46664	0.044665	0.32627
AW549877	4	0.22889	0.84098	0.30802	0.77901	0.40036	0.78391	0.28321	1.0414	0.25842	0.74247	0.29769	0.66605
Acta2	4	0.14589	0.74237	0.50825	0.89618	0.45786	0.80641	0.049347	0.25118	0.84187	0.98287	0.80167	0.92576
Bglap3	5	-0.35202	-2.3397	0.19287	0.6566	0.019301	0.19652	-0.1203	-0.80113	0.64931	0.94265	0.42306	0.74403
Aimp2	4	-0.021271	-0.061911	0.97119	0.9976	0.95063	0.98726	-0.029541	-0.086029	0.92315	0.99297	0.93144	0.97642
Glipr1l1	4	0.087814	0.45472	0.67665	0.94124	0.64931	0.88401	0.095522	0.49494	0.70294	0.95712	0.62064	0.84644
Pibf1	4	-0.12246	-0.47907	0.67708	0.94128	0.63189	0.87707	0.31191	1.2276	0.2131	0.69212	0.21958	0.60818
2900092C05Rik	4	0.23318	0.85552	0.29953	0.77125	0.39226	0.7807	0.23584	0.86559	0.34424	0.80941	0.38671	0.72133
Six2	4	-0.12438	-0.89671	0.67171	0.94038	0.36987	0.76755	-0.066414	-0.47915	0.8174	0.98045	0.63183	0.85135
Fcrlb	4	0.24455	0.85579	0.27674	0.75241	0.39212	0.7807	0.26195	0.91708	0.29528	0.77358	0.3591	0.70473
Ankle1	4	0.52598	1.6814	0.02686	0.25142	0.092681	0.51813	0.34888	1.1153	0.16631	0.63266	0.26474	0.64333
Adh5	4	0.45953	1.5687	0.049474	0.35543	0.11672	0.56377	0.31564	1.0775	0.20842	0.68699	0.28126	0.65566
NO_SITE_692	1	0.052072	0.097311	0.92042	0.98935	0.92248	0.97882	-0.19383	-0.36248	0.67088	0.95123	0.717	0.89077
Cdkn3	4	-0.049333	-0.2735	0.88385	0.98618	0.78447	0.93422	-0.2408	-1.335	0.40896	0.84641	0.18189	0.58429
Aard	4	-0.0073123	-0.041093	0.98258	0.99882	0.96722	0.99147	0.26068	1.4662	0.29758	0.7759	0.14259	0.54701
Eif2b3	4	-1.284	-3.2632	0.00073647	0.023129	0.0011014	0.024926	-0.96406	-2.466	0.0084478	0.12067	0.013663	0.14419
Ap3s2	4	0.082388	0.40349	0.69454	0.94746	0.68659	0.89766	0.006553	0.032106	0.97249	0.99764	0.97439	0.99144
Dusp3	4	-0.040263	-0.16523	0.9124	0.98932	0.86876	0.96381	0.32657	1.3427	0.19378	0.67147	0.17938	0.58351
Zfp382	4	0.7664	1.6281	0.0030325	0.061404	0.1035	0.54135	0.20732	0.44035	0.40762	0.84537	0.65968	0.86283
Mterf4	4	-0.29876	-1.3956	0.31252	0.78268	0.16283	0.62602	-0.61444	-2.8649	0.06494	0.40979	0.0041712	0.058561
Trim28	4	1.0534	1.9206	0.00012997	0.0070922	0.054783	0.39099	0.68066	1.241	0.012867	0.1555	0.2146	0.60485
Dnah6	4	0.15502	0.53428	0.48343	0.88627	0.59315	0.86284	0.088522	0.30522	0.72413	0.96151	0.7602	0.9086
Pacsin2	4	0.29265	1.2061	0.19677	0.66181	0.22776	0.68534	0.38592	1.5912	0.1249	0.55545	0.11157	0.50677
Fhl2	4	0.034497	0.23522	0.84634	0.97975	0.81404	0.94363	-0.080985	-0.55228	0.77642	0.97196	0.58076	0.82618
9330159F19Rik	4	0.22063	1.5646	0.32444	0.79289	0.11767	0.56637	0.20329	1.4423	0.41602	0.84915	0.14922	0.55488
Hgd	4	0.24194	1.3558	0.28224	0.75897	0.17517	0.63792	0.093899	0.52616	0.70784	0.95793	0.59878	0.83478
5730409E04Rik	4	0.14802	0.80611	0.50219	0.89314	0.42018	0.79272	0.44684	2.4356	0.080016	0.44931	0.014866	0.15434
Ube2q2	4	0.18191	0.89775	0.4139	0.85548	0.36932	0.76733	0.048857	0.24119	0.84335	0.98299	0.80941	0.92889
Dqx1	4	0.15292	0.79445	0.48845	0.88745	0.42693	0.79462	0.051965	0.27002	0.83347	0.98179	0.78714	0.91989
Olfr876	4	0.21415	0.90335	0.33626	0.79752	0.36634	0.7659	0.24942	1.0526	0.31725	0.79027	0.29253	0.66159
Kcna10	4	-0.030233	-0.18258	0.9432	0.99195	0.85512	0.95964	0.045444	0.27478	0.85427	0.98467	0.78349	0.91798
Fbxo5	4	-0.052902	-0.18606	0.87337	0.98332	0.85239	0.95857	-0.35951	-1.2565	0.24178	0.72546	0.20894	0.60401
Gng5	4	-0.48061	-1.8817	0.12572	0.54858	0.059871	0.41278	-0.58302	-2.2842	0.07681	0.44192	0.022361	0.20337
NO_SITE_48	1	-0.66174	-0.79425	0.27115	0.74743	0.42705	0.79473	-1.8543	-2.2514	0.068189	0.41833	0.024363	0.21646
Rrm1	4	-0.92486	-2.3687	0.010051	0.13623	0.01785	0.18636	-0.29839	-0.77485	0.31915	0.79181	0.43843	0.75171
Adhfe1	4	0.3548	0.97213	0.12104	0.53865	0.33099	0.74785	0.39192	1.0743	0.11974	0.54623	0.28268	0.65632
Rgs14	4	0.39887	1.2387	0.083308	0.45983	0.21545	0.67568	0.10477	0.32499	0.67543	0.95265	0.74519	0.9029
Tas2r118	4	0.18263	1.0172	0.41208	0.85432	0.30907	0.73499	-0.0092177	-0.051349	0.97968	0.99784	0.95905	0.98522
Rev3l	4	-0.4963	-2.1663	0.11584	0.53066	0.030289	0.27122	-0.83599	-3.6435	0.018932	0.19882	0.00026899	0.0074897
BC049762	4	0.38356	1.3766	0.094312	0.48561	0.16862	0.63189	0.25692	0.92218	0.30447	0.78303	0.35643	0.70325
Ptgir	4	0.31347	1.3268	0.16865	0.62139	0.18459	0.6493	0.26959	1.1415	0.2822	0.76241	0.25368	0.6343
Ptbp2	4	0.2327	1.3481	0.30035	0.77173	0.17763	0.64095	-0.050734	-0.29386	0.86154	0.98666	0.76886	0.91172
Rpain	4	-0.25863	-0.86413	0.37638	0.8283	0.38752	0.7798	-0.35593	-1.1896	0.24555	0.73069	0.23419	0.62065
Rab43	4	0.10659	0.66355	0.62128	0.9298	0.50698	0.82614	0.22168	1.3809	0.37595	0.82949	0.1673	0.57296
Gm4922	4	0.10659	0.6917	0.62128	0.9298	0.48912	0.8177	0.0081698	0.053044	0.96794	0.99711	0.9577	0.98482
Cerk	4	0.86151	1.169	0.001083	0.03034	0.24239	0.69477	0.59014	0.79705	0.02621	0.24181	0.42542	0.74515
Arhgef3	4	0.33872	0.6988	0.13885	0.57445	0.48468	0.81541	0.51523	1.0646	0.048391	0.34884	0.28704	0.65858
Tmem11	4	0.12274	1.1268	0.57488	0.91879	0.25981	0.70692	-0.033618	-0.3087	0.91119	0.99297	0.75755	0.908
2810474O19Rik	4	0.13279	0.59394	0.54577	0.91176	0.55255	0.84512	0.22212	0.99419	0.37499	0.82914	0.32013	0.68041
6430571L13Rik	4	0.10384	0.56147	0.62851	0.93113	0.57448	0.85556	0.11442	0.61914	0.6468	0.94166	0.53582	0.80319
Tgif2lx2	8	0.19912	1.6222	0.2095	0.6817	0.10475	0.54349	0.018029	0.1469	0.89481	0.99118	0.88321	0.95954
Vmn1r178	10	-0.088	-0.31932	0.67842	0.94154	0.74948	0.9222	-0.1387	-0.50288	0.46974	0.87997	0.61505	0.84353
Cpb2	4	0.53546	1.5757	0.024823	0.23825	0.11509	0.56207	0.33365	0.98186	0.18485	0.66165	0.32617	0.6845
Lmo1	4	0.39835	1.5724	0.083611	0.46053	0.11586	0.56258	0.10027	0.39582	0.68852	0.95489	0.69224	0.87932
Bhlhe22	4	0.03668	0.30559	0.83811	0.97791	0.75992	0.92595	-0.15176	-1.2644	0.59355	0.92558	0.20609	0.60187
Vwc2l	4	0.054349	0.34602	0.78469	0.97183	0.72933	0.91444	-0.18919	-1.2046	0.50929	0.89319	0.22837	0.61575
Zfp260	4	0.26397	0.84595	0.24334	0.72319	0.39758	0.78273	0.54179	1.7374	0.039943	0.3135	0.082312	0.45314
Usp26	4	0.45517	1.4515	0.052246	0.3678	0.14665	0.61148	0.24713	0.78757	0.32184	0.79353	0.43095	0.74739
Rassf5	4	0.62833	1.006	0.010527	0.13815	0.31443	0.73779	0.86652	1.3877	0.0024693	0.055179	0.16522	0.57006
Psmd14	4	-0.22098	-0.77312	0.44869	0.86989	0.43945	0.80028	-0.71024	-2.4888	0.039076	0.30922	0.012818	0.13716
Runx1t1	4	0.20602	0.93891	0.35481	0.81387	0.34778	0.75766	0.28716	1.3093	0.25209	0.73674	0.19043	0.59187
Olfr214	4	-0.1197	-1.0327	0.68483	0.9436	0.30174	0.73202	-0.068427	-0.59071	0.81112	0.97867	0.55471	0.81268
Mrgpra2a	8	0.21503	1.32	0.17654	0.63313	0.18685	0.65214	0.31518	1.9369	0.086167	0.46664	0.052759	0.35945
Mrc1	4	0.038758	0.17918	0.83187	0.97647	0.8578	0.96074	0.10176	0.4706	0.68366	0.95463	0.63793	0.85404
Ly6f	4	0.33893	1.5223	0.13859	0.57402	0.12795	0.58275	0.23275	1.0456	0.3506	0.81542	0.29575	0.66436
Hrc	4	0.57648	2.2569	0.016462	0.18366	0.024013	0.23043	0.30696	1.2019	0.22038	0.70262	0.2294	0.61609
Cul2	4	-1.5878	-4.9337	8.6644e-05	0.0049383	8.0683e-07	0.00013594	-1.2247	-3.847	0.0016896	0.042117	0.00011956	0.0042263
Fbxo34	4	-0.10026	-0.38888	0.73838	0.9598	0.69736	0.90105	-0.20183	-0.78106	0.48222	0.88229	0.43477	0.74944
Mybbp1a	4	-1.1922	-3.559	0.0019062	0.046316	0.00037222	0.01138	-1.8588	-5.507	0.00017329	0.012195	3.649e-08	9.2518e-06
Eps8l2	4	0.15773	0.24987	0.47615	0.88231	0.80269	0.93881	0.84251	1.3362	0.0033791	0.066781	0.1815	0.58429
Atrip	4	-0.16092	-0.62564	0.5819	0.92095	0.53155	0.83546	-0.38731	-1.5056	0.21085	0.69075	0.13218	0.53587
Gm3643	2	-2.3452	-3.3267	0.0015596	0.039604	0.00087891	0.02124	-0.53525	-0.79803	0.2267	0.7096	0.42485	0.74503
Gm9231	1	-0.62413	-1.4361	0.28831	0.76252	0.15099	0.61664	-0.52202	-1.2039	0.36113	0.81991	0.22863	0.61575
Mettl8	4	0.1998	0.95156	0.36854	0.82251	0.34132	0.75417	0.26811	1.2775	0.28441	0.76462	0.20144	0.59872
Olfr1019	4	-0.10993	-0.63529	0.71247	0.95462	0.52524	0.83328	0.22662	1.3115	0.36468	0.8225	0.18969	0.59164
Cntn1	4	0.01886	0.11379	0.89555	0.98764	0.90941	0.97446	0.24988	1.5086	0.31625	0.78945	0.13139	0.53557
Ak3	4	0.22806	0.76559	0.30958	0.78073	0.44392	0.80169	0.45697	1.5355	0.073821	0.43245	0.12465	0.52507
Gnmt	4	0.12928	0.69453	0.55595	0.91371	0.48735	0.81704	-0.098726	-0.53047	0.72725	0.96151	0.59579	0.83328
Slc10a5	4	0.20102	0.89923	0.36624	0.82133	0.36853	0.76686	0.16732	0.74882	0.50149	0.88829	0.45397	0.76055
Igsf9b	4	0.16715	0.69615	0.45102	0.87077	0.48633	0.81638	-0.10475	-0.4364	0.71065	0.95841	0.66255	0.86444
Fam171b	4	0.15379	0.67486	0.4862	0.88698	0.49977	0.82224	0.33822	1.4856	0.17853	0.65072	0.13738	0.5418
Kl	4	0.03791	0.17553	0.83451	0.97688	0.86066	0.96157	0.16287	0.75554	0.51388	0.89546	0.44993	0.75747
Gm38405	1	-0.11813	-0.44105	0.77356	0.96955	0.65918	0.88725	-0.4598	-1.7172	0.4006	0.8414	0.085944	0.46004
NO_SITE_402	1	-0.31777	-1.6142	0.51332	0.89773	0.10648	0.54741	-0.072773	-0.36993	0.84521	0.98307	0.71143	0.88784
Fam160a2	8	0.3118	1.8697	0.055625	0.38033	0.061532	0.41854	0.3248	1.9481	0.07746	0.44409	0.051401	0.35513
LOC105242403	17	-0.56868	-3.4773	0.00025993	0.010949	0.0005065	0.014043	-0.44107	-2.7152	0.0039856	0.075658	0.0066233	0.083301
Olfr1155	4	0.28091	1.6753	0.21583	0.69041	0.093871	0.51917	0.22514	1.343	0.36824	0.82468	0.17926	0.58351
Vmn2r-ps36	13	-0.4785	-2.7541	0.0069748	0.10683	0.0058846	0.082311	-0.45782	-2.6421	0.010484	0.1375	0.00824	0.098439
Hoxa13	4	-0.055903	-0.20546	0.86427	0.98099	0.83721	0.95283	0.086678	0.31962	0.72932	0.96216	0.74926	0.90472
Barhl1	4	0.15854	0.96854	0.47347	0.88078	0.33278	0.74919	0.052998	0.32383	0.8307	0.98179	0.74607	0.9033
Smpd2	4	0.49131	1.4396	0.037257	0.30486	0.14998	0.61507	0.49479	1.4502	0.055842	0.37525	0.147	0.55298
Clgn	4	0.21413	1.1193	0.33631	0.79752	0.26299	0.70927	-0.14743	-0.76985	0.60412	0.92944	0.44139	0.7535
Supv3l1	4	-2.24	-5.3971	0	0	6.7723e-08	2.6496e-05	-1.7068	-4.2195	0.00021661	0.012195	2.4481e-05	0.0012983
Unc13c	4	-0.0031681	-0.02149	0.96898	0.99692	0.98285	0.99556	0.1693	1.1494	0.4966	0.88686	0.25039	0.6322
Tmem158	4	0.091633	0.50922	0.66555	0.93941	0.6106	0.86753	-0.021291	-0.11834	0.94611	0.99508	0.9058	0.96522
Vps72	4	-1.1526	-4.3077	0.0022961	0.05191	1.6499e-05	0.0012569	-0.66688	-2.5155	0.049517	0.3518	0.011888	0.12981
Ntng1	4	0.1681	0.78574	0.44869	0.86989	0.43202	0.79748	0.20341	0.95118	0.41559	0.84856	0.34151	0.69393
Tigd2	4	0.29977	1.0194	0.18706	0.64893	0.30799	0.73459	0.29392	0.99998	0.24078	0.725	0.31732	0.67777
Setdb1	4	-0.40316	-1.5696	0.18477	0.64539	0.11651	0.56361	-0.60169	-2.3415	0.070398	0.42363	0.019208	0.18298
Sec22c	4	0.12351	0.31984	0.57302	0.91879	0.74909	0.92212	0.66494	1.7255	0.01421	0.16482	0.084443	0.45637
Olfr507	4	-0.29233	-1.1152	0.32258	0.79162	0.26475	0.7106	-0.50333	-1.9183	0.11992	0.54669	0.055068	0.36896
Pcdhgb1	4	0.13455	0.941	0.5407	0.91108	0.3467	0.75704	0.18027	1.2612	0.47091	0.88001	0.20723	0.60337
Mical3	4	-0.3988	-2.1247	0.18953	0.65154	0.033612	0.2895	-0.19951	-1.0646	0.48776	0.8854	0.28705	0.65858
LOC108168577	16	0.04962	0.47976	0.58805	0.92212	0.6314	0.87692	0.084943	0.82171	0.49664	0.88686	0.41124	0.73606
Npas3	4	0.26365	0.54375	0.24408	0.72426	0.58661	0.86	0.65289	1.3471	0.015509	0.17396	0.17794	0.58342
Srgap1	4	0.20176	1.2232	0.36468	0.82026	0.22124	0.67984	0.25052	1.5195	0.31478	0.78833	0.12864	0.53226
Gm21685	4	0.0061498	0.046656	0.9364	0.99097	0.96279	0.99008	0.0106	0.080471	0.96036	0.99711	0.93586	0.97741
Dact3	4	0.12184	0.75927	0.57739	0.91892	0.44769	0.80293	0.053801	0.3354	0.82819	0.98152	0.73732	0.89851
NO_SITE_192	1	0.024733	0.28252	0.9747	0.99814	0.77755	0.93252	0.022478	0.25698	0.99645	0.99874	0.7972	0.92368
Pdc	4	0.080212	0.50686	0.70177	0.95076	0.61225	0.86863	0.22895	1.4479	0.35901	0.81865	0.14766	0.55327
Dmrt1	4	0.021926	0.092622	0.88658	0.98655	0.9262	0.97964	0.040826	0.17263	0.86891	0.98803	0.86294	0.95103
Vmn1r236	4	0.079471	0.49659	0.70441	0.9521	0.61948	0.87172	-0.2639	-1.6485	0.36867	0.8253	0.099254	0.48462
Vmn2r75	4	-0.1011	-0.7749	0.73613	0.9596	0.4384	0.80002	-0.13325	-1.022	0.63774	0.93854	0.30679	0.67017
Gys1	4	0.32948	1.5834	0.14972	0.59154	0.11334	0.55957	0.11081	0.53253	0.65797	0.94706	0.59436	0.8325
Olfr155	5	0.34358	1.0508	0.094182	0.48538	0.29333	0.7283	0.32641	0.99859	0.15657	0.61396	0.31799	0.67846
Map3k1	4	0.21568	1.0404	0.33349	0.79743	0.29816	0.72997	0.31477	1.519	0.20946	0.68777	0.12877	0.53226
Fhit	4	-0.0050261	-0.02536	0.97583	0.99827	0.97977	0.99415	-0.094301	-0.47592	0.73938	0.96442	0.63413	0.85227
Rps2	4	-0.93741	-2.3175	0.0092276	0.12964	0.020476	0.20541	-1.2793	-3.1663	0.0012563	0.034731	0.0015441	0.027584
Pgk2	4	-0.040048	-0.27658	0.91318	0.98932	0.78211	0.9333	-0.082282	-0.56847	0.77252	0.97077	0.56971	0.82069
Pbp2	4	0.062533	0.24974	0.75835	0.96618	0.80279	0.93881	0.24776	0.99042	0.32063	0.79265	0.32197	0.68139
Cyhr1	4	-0.040148	-0.18673	0.91292	0.98932	0.85187	0.95842	0.36889	1.7169	0.144	0.59104	0.085996	0.46004
Wtap	4	-0.75075	-3.1123	0.028116	0.25815	0.0018565	0.035445	-0.42028	-1.7473	0.18091	0.6545	0.08058	0.44841
Cdc25c	4	0.24962	0.96799	0.26747	0.74412	0.33305	0.74966	0.10516	0.40789	0.67422	0.95233	0.68336	0.87511
Zfp512	4	0.42152	1.507	0.069705	0.42198	0.13181	0.58962	0.067236	0.24039	0.78694	0.97386	0.81003	0.92918
Proca1	4	-0.086197	-0.59048	0.77841	0.9704	0.55487	0.84659	0.0045679	0.031328	0.97864	0.99784	0.97501	0.99154
Hdc	4	0.045872	0.17858	0.81064	0.97472	0.85826	0.96087	0.43833	1.708	0.085214	0.46457	0.08764	0.46261
Nfia	4	-0.031482	-0.19686	0.93935	0.99159	0.84394	0.95559	0.12833	0.80297	0.6075	0.93127	0.42199	0.74329
Nelfb	4	-1.0722	-2.9678	0.0039423	0.073625	0.0029998	0.050729	-1.2911	-3.5616	0.0011697	0.033666	0.00036854	0.0094734
Rlf	4	-0.09793	-0.65141	0.74501	0.96187	0.51478	0.82993	-0.067385	-0.44853	0.8145	0.97948	0.65377	0.86166
Ceacam9	4	0.080429	0.50797	0.70104	0.95032	0.61148	0.86785	-0.072277	-0.45665	0.79894	0.9759	0.64792	0.85842
LOC108167712	1	-0.92332	-1.8473	0.18858	0.64999	0.064701	0.42892	-1.2044	-2.4309	0.14175	0.58617	0.015059	0.15434
Ksr1	4	0.25749	1.1531	0.25421	0.73311	0.24886	0.69846	0.41213	1.8473	0.10345	0.51288	0.064707	0.40367
NO_SITE_652	1	0.10023	0.27169	0.8229	0.97491	0.78586	0.93463	-0.46858	-1.2703	0.3938	0.83755	0.20399	0.60018
LOC108167910	1	-1.9161	-2.4513	0.059048	0.38788	0.014233	0.16177	-1.8655	-2.4151	0.067409	0.41482	0.015733	0.1568
Sorcs3	4	0.10047	0.65108	0.63891	0.93295	0.515	0.82993	-0.10093	-0.65391	0.72114	0.96103	0.51317	0.79318
Myl7	4	0.17737	0.64868	0.42568	0.85927	0.51654	0.83066	0.29205	1.0686	0.24373	0.72866	0.28526	0.65778
Ift80	4	0.33493	1.2267	0.14379	0.58518	0.21992	0.67787	0.37639	1.3794	0.13447	0.57069	0.16777	0.57351
Olfr1440	4	-0.33842	-2.4595	0.25829	0.73714	0.013911	0.16161	0.042052	0.30621	0.8644	0.98736	0.75945	0.90835
Acox2	4	-0.10754	-0.7763	0.71854	0.95624	0.43757	0.79977	-0.031001	-0.22393	0.91868	0.99297	0.82281	0.93536
Bsnd	4	0.61025	1.5482	0.012563	0.15566	0.12157	0.57299	0.23412	0.59398	0.34766	0.81208	0.55253	0.81184
Aldh3b1	4	0.016497	0.068416	0.90396	0.98878	0.94545	0.98592	0.17998	0.7469	0.47156	0.88001	0.45513	0.76142
Otub1	4	-0.20052	-0.96379	0.49114	0.88823	0.33515	0.75143	-0.22824	-1.0977	0.43162	0.85722	0.27234	0.64905
2210404O09Rik	6	-0.039327	-0.26441	0.91301	0.98932	0.79146	0.93585	-0.058312	-0.39235	0.81441	0.97948	0.6948	0.88053
St7l	4	0.17697	0.67924	0.42663	0.85927	0.49699	0.82066	0.32326	1.2414	0.19837	0.67684	0.21446	0.60485
Chm	4	0.10876	0.55204	0.61448	0.92907	0.58092	0.85712	0.090988	0.46214	0.71637	0.96011	0.64398	0.85673
Angptl8	4	-0.0023795	-0.01731	0.9669	0.99665	0.98619	0.99641	-0.06596	-0.48006	0.81874	0.98045	0.63118	0.85093
Ap3d1	4	0.26511	0.99229	0.24152	0.72103	0.32105	0.7416	0.60248	2.2559	0.023654	0.22722	0.024076	0.21503
Mup1	17	-0.45853	-2.7872	0.002426	0.053486	0.0053171	0.076613	-0.69593	-4.2274	0	0	2.3642e-05	0.0012679
F830045P16Rik	4	0.083271	0.56352	0.69142	0.94611	0.57308	0.85489	0.19203	1.3003	0.44184	0.86264	0.1935	0.59546
Retnlg	4	0.10788	0.44639	0.61751	0.9298	0.65532	0.88605	0.0077066	0.031894	0.96898	0.99711	0.97456	0.99152
NO_SITE_788	1	-0.15015	-0.36646	0.7259	0.95798	0.71402	0.90938	-0.2277	-0.55602	0.62544	0.93664	0.5782	0.82447
Hypm	4	0.1818	0.80705	0.41407	0.85568	0.41964	0.79204	0.1859	0.82556	0.45692	0.87238	0.40905	0.73486
NO_SITE_643	1	0.36078	0.51996	0.38998	0.83927	0.60309	0.86605	0.31385	0.45242	0.48659	0.88434	0.65097	0.86012
Nrg2	4	-0.17066	-1.1731	0.55972	0.91508	0.24074	0.69297	0.074353	0.51167	0.76511	0.96982	0.60888	0.84076
Gm12245	2	0.12753	0.86153	0.67989	0.94207	0.38895	0.78016	0.24211	1.6366	0.48031	0.88164	0.10171	0.48978
Ndc80	4	-0.60496	-1.6047	0.06403	0.40229	0.10856	0.55245	-0.13843	-0.3736	0.62522	0.93664	0.7087	0.88646
Asb2	4	0.30276	1.2687	0.18256	0.64238	0.20455	0.66492	0.32003	1.3416	0.20292	0.68003	0.17973	0.58367
Gm5457	1	0.17622	0.54592	0.68388	0.94312	0.58512	0.85893	-0.59404	-1.8399	0.32058	0.79265	0.065789	0.40758
Zfand3	4	-0.16172	-1.105	0.58012	0.91977	0.26918	0.7141	0.20775	1.422	0.40697	0.84494	0.15502	0.5605
Adam19	4	0.033636	0.30869	0.84872	0.9799	0.75755	0.92512	0.0066224	0.060801	0.97223	0.9976	0.95152	0.983
Olfr1302	4	-0.17398	-1.0334	0.55162	0.91371	0.3014	0.73202	-0.067967	-0.40404	0.81229	0.97908	0.68618	0.87647
Srrm1	4	-0.93377	-3.2678	0.0094442	0.13125	0.0010839	0.024577	-0.31844	-1.1295	0.2916	0.77023	0.25868	0.63763
Atg2a	4	0.10888	0.56837	0.61422	0.92907	0.56978	0.85432	0.11599	0.60579	0.64229	0.94015	0.54466	0.80812
Baiap3	4	0.072994	0.39486	0.72495	0.95776	0.69294	0.89888	0.13359	0.72313	0.59256	0.92558	0.4696	0.77041
Ephb6	4	0.23073	1.186	0.30369	0.77429	0.23562	0.68844	0.22346	1.149	0.37196	0.82749	0.25057	0.63227
Dsg4	4	0.20655	0.78487	0.35368	0.81372	0.43253	0.79764	0.17267	0.65636	0.48902	0.88574	0.51159	0.79213
Popdc3	4	0.23984	0.81042	0.28545	0.76121	0.4177	0.7915	0.5074	1.7163	0.051423	0.35894	0.086099	0.46004
Evl	4	-0.080199	-0.36409	0.79517	0.97322	0.71579	0.90938	0.19791	0.89928	0.42871	0.85587	0.3685	0.71063
Traf3ip1	4	0.0085292	0.03788	0.92852	0.98966	0.96978	0.992	-0.12143	-0.53943	0.6669	0.94986	0.58959	0.8303
Olfr1418	5	-0.1819	-0.94789	0.49534	0.88942	0.34318	0.75577	0.057957	0.30244	0.7908	0.97428	0.76232	0.90961
Pawr	4	0.57312	1.5253	0.017155	0.18723	0.12718	0.58097	0.47267	1.2581	0.066196	0.4142	0.20835	0.60382
INACTIVE_4T_5	1	-0.26741	-0.79403	0.56843	0.91768	0.42718	0.79473	-0.17512	-0.52042	0.69744	0.95634	0.60277	0.83702
Colgalt1	4	-0.0088733	-0.04068	0.98809	0.99909	0.96755	0.99161	0.29125	1.3368	0.2449	0.7297	0.18128	0.58429
Zfp865	4	0.36128	1.5974	0.11511	0.52896	0.11017	0.55443	0.2974	1.3152	0.23506	0.71943	0.18844	0.59101
Bpifa3	4	-0.12813	-0.83633	0.66196	0.93922	0.40297	0.78597	0.042174	0.27545	0.86397	0.98736	0.78297	0.91782
Vmn1r183	13	-0.11392	-0.43308	0.5261	0.90317	0.66496	0.88945	-0.070873	-0.26996	0.68319	0.95461	0.78719	0.91989
Tesk2	4	0.30118	1.433	0.18498	0.64546	0.15186	0.61757	0.1717	0.81718	0.4911	0.88624	0.41383	0.73842
BC022687	4	-0.019555	-0.11442	0.97721	0.99836	0.9089	0.97445	0.14499	0.84916	0.56015	0.91526	0.39579	0.72645
Serf1	4	-0.021556	-0.091171	0.97032	0.99742	0.92736	0.98008	-0.045154	-0.19111	0.87653	0.98934	0.84844	0.9452
Pmaip1	4	-0.22883	-1.3003	0.43253	0.86291	0.1935	0.65825	-0.024927	-0.14179	0.93636	0.99467	0.88725	0.95954
Zfp787	4	0.54238	1.2059	0.02361	0.23172	0.22784	0.68534	0.87503	1.9462	0.0021661	0.05	0.051626	0.35617
Slc6a2	4	0.0094925	0.041415	0.92553	0.98953	0.96696	0.9914	0.24882	1.0861	0.31837	0.79101	0.27743	0.65246
Hnrnpl	4	-1.4225	-3.7849	0.00034658	0.013817	0.00015378	0.0059559	-0.986	-2.6422	0.0074514	0.11133	0.0082362	0.098439
Edem3	4	-0.2118	-1.1725	0.46692	0.87976	0.24098	0.69324	-0.0186	-0.1031	0.953	0.9962	0.91788	0.9707
Slc34a2	4	0.24796	0.97269	0.27011	0.74638	0.33071	0.7476	0.58944	2.3135	0.026296	0.24212	0.020693	0.19244
Ciz1	4	0.10099	0.59233	0.63744	0.93275	0.55363	0.84582	-0.28985	-1.6992	0.33111	0.7999	0.089275	0.46475
Gramd4	4	0.025593	0.10794	0.87419	0.98367	0.91404	0.97636	0.035751	0.15086	0.88446	0.99047	0.88009	0.95826
Canx	4	-0.17976	-1.0268	0.53836	0.91067	0.30453	0.73286	-0.2538	-1.4507	0.38712	0.83561	0.14687	0.55298
Adam3	4	0.1293	0.5503	0.55578	0.91371	0.58211	0.85771	0.19087	0.81263	0.44479	0.86456	0.41643	0.73982
Ccdc151	4	0.18674	1.075	0.40073	0.84653	0.28236	0.72305	-0.1493	-0.85888	0.59997	0.92785	0.3904	0.72325
Pdxdc1	4	0.20363	1.0726	0.36044	0.81832	0.28347	0.72405	0.073704	0.38836	0.76684	0.96982	0.69775	0.88176
NO_SITE_760	1	0.6085	1.0067	0.15284	0.59488	0.31409	0.73779	0.4531	0.74969	0.31235	0.786	0.45344	0.76033
Catsper3	4	0.30568	1.4177	0.17823	0.63483	0.15629	0.62189	0.34639	1.6069	0.16935	0.63716	0.10807	0.5008
Def8	4	0.084038	0.15662	0.68934	0.9454	0.87554	0.96486	0.42241	0.79251	0.096001	0.49475	0.42806	0.74653
Eif4ebp2	4	0.0084981	0.046762	0.92856	0.98966	0.9627	0.99008	-0.03949	-0.21742	0.89325	0.99106	0.82788	0.9375
Gm4884	4	0.042642	0.20745	0.82039	0.97489	0.83566	0.95214	-0.072308	-0.35191	0.79881	0.9759	0.7249	0.89381
Foxi3	4	0.37821	1.2859	0.098947	0.4948	0.19848	0.66045	0.5108	1.7391	0.049907	0.35305	0.082026	0.45263
Olfr346	4	0.28469	1.1894	0.20981	0.68192	0.23427	0.68818	0.24145	1.009	0.33362	0.80235	0.31297	0.6739
Olfr437	4	0.061625	0.27073	0.76138	0.96652	0.7866	0.93477	0.26709	1.1784	0.28605	0.76518	0.23863	0.62318
B430306N03Rik	4	-0.12601	-0.60672	0.66759	0.94009	0.54403	0.84197	-0.30262	-1.4567	0.31296	0.78616	0.14521	0.55031
Ciapin1	4	-0.58351	-1.8331	0.071611	0.42724	0.066786	0.43598	-0.34933	-1.1018	0.25326	0.73772	0.27053	0.64799
Eps15l1	4	0.13836	0.75368	0.52913	0.90494	0.45104	0.80336	-0.014136	-0.077025	0.96573	0.99711	0.9386	0.97863
Cox8a	4	0.046958	0.22627	0.80778	0.97463	0.82099	0.94579	-0.10823	-0.52163	0.70177	0.95705	0.60193	0.8366
Cdc14b	4	0.28692	1.0163	0.20617	0.67705	0.30947	0.73523	0.18152	0.643	0.46801	0.87886	0.52022	0.7957
Slc4a1	4	0.087009	0.44867	0.67937	0.9417	0.65367	0.88582	0.17983	0.92796	0.47195	0.88001	0.35343	0.70103
Gins3	4	-0.95057	-3.0294	0.0085777	0.12367	0.0024507	0.043762	-1.0102	-3.232	0.0063683	0.10089	0.0012291	0.023294
Aox3	4	0.28743	0.83412	0.20539	0.67608	0.40421	0.78712	0.44005	1.2784	0.084218	0.46187	0.20111	0.59872
Ddah1	4	0.19304	0.83198	0.38557	0.83491	0.40542	0.78793	0.18426	0.79449	0.46082	0.87425	0.42691	0.7457
Ints2	4	-0.37222	-1.5854	0.2167	0.69115	0.11287	0.5585	-0.48741	-2.0812	0.12997	0.56378	0.037418	0.29111
Ccdc65	4	-0.058167	-0.25572	0.85764	0.98099	0.79817	0.93661	0.15488	0.68144	0.53524	0.90662	0.49559	0.78502
Mrps22	4	-0.96714	-2.9915	0.0076247	0.1137	0.0027765	0.048188	-0.71919	-2.2336	0.037257	0.3025	0.025509	0.22414
POTENTIALLY_ACTIVE_5	1	-1.7989	-3.5846	0.068145	0.4168	0.00033763	0.010589	0.29209	0.58987	0.52064	0.89908	0.55528	0.81289
Pik3r4	4	-1.0007	-2.6629	0.0061084	0.097241	0.0077465	0.10247	-1.3145	-3.4843	0.0011264	0.032704	0.00049336	0.011753
Akr1b3	4	0.26761	0.95868	0.23723	0.71647	0.33772	0.75301	0.31835	1.1405	0.20517	0.68152	0.25407	0.63459
NO_SITE_901	1	0.15185	0.6679	0.73054	0.95909	0.5042	0.82395	0.070864	0.31175	0.91214	0.99297	0.75523	0.90672
4930402F06Rik	4	0.0097434	0.063794	0.92505	0.98953	0.94913	0.98649	-0.095693	-0.62671	0.73539	0.96367	0.53085	0.79996
Pid1	4	0.012704	0.060596	0.91613	0.98935	0.95168	0.98761	-0.049426	-0.23583	0.86479	0.98736	0.81357	0.93071
Gm10922	28	-0.26061	-2.428	0.026513	0.24888	0.015183	0.16745	-0.40937	-3.8066	0.00073647	0.025449	0.00014088	0.0046192
Lipo2	1	0.38505	0.90423	0.35663	0.81512	0.36587	0.76562	0.29709	0.69785	0.51259	0.89542	0.48527	0.77901
Gm2075	7	-0.32463	-1.6607	0.15851	0.60449	0.096768	0.52719	-0.67202	-3.4185	0.0091842	0.12687	0.00062963	0.014042
H2-Q2	4	-0.28369	-1.7481	0.33566	0.79752	0.080446	0.48535	0.13166	0.8128	0.59732	0.92755	0.41633	0.7397
Pafah2	4	0.0176	0.09835	0.8998	0.98764	0.92165	0.97871	0.12819	0.71674	0.60802	0.9316	0.47353	0.77237
Tbl1xr1	4	-0.44428	-2.2291	0.15063	0.59203	0.025807	0.24354	-0.13153	-0.66111	0.64173	0.94015	0.50854	0.79125
Ispd	4	0.33831	1.7604	0.13967	0.57582	0.078337	0.47861	-0.049014	-0.25495	0.86596	0.98736	0.79876	0.92443
Slf1	4	-0.24399	-0.96034	0.40229	0.84782	0.33689	0.75214	-0.49163	-1.9349	0.12711	0.56033	0.053002	0.36026
Gm6644	3	0.23661	0.62264	0.35658	0.81512	0.53352	0.83673	0.36921	0.97183	0.20262	0.67979	0.33114	0.68911
Dmkn	4	0.14155	0.58579	0.52025	0.90132	0.55802	0.84854	0.17673	0.73161	0.47975	0.88164	0.46441	0.76757
Dst	4	0.058708	0.35076	0.77048	0.96911	0.72577	0.91297	0.045593	0.27254	0.85379	0.98446	0.78521	0.91904
Ggct	4	-0.10151	-0.42404	0.73522	0.9596	0.67153	0.891	0.2479	1.0375	0.32028	0.79243	0.2995	0.66665
Cpsf6	4	-0.31455	-1.0359	0.28995	0.76383	0.30026	0.73112	-0.28061	-0.92524	0.34406	0.80933	0.35484	0.70248
Lpin3	4	0.13285	0.54202	0.54568	0.91176	0.58781	0.86041	0.025826	0.10539	0.9134	0.99297	0.91607	0.96967
Slc22a13	4	0.16059	0.43863	0.46879	0.88057	0.66093	0.8878	0.66366	1.8142	0.014296	0.16558	0.069644	0.42117
NO_SITE_868	1	0.024295	0.049381	0.9757	0.99827	0.96062	0.98942	0.5168	1.0513	0.25231	0.73675	0.29311	0.66222
Lce1g	6	0.056453	0.35388	0.71854	0.95624	0.72343	0.91186	-0.35223	-2.1974	0.15756	0.61498	0.027991	0.24034
Rgcc	4	-0.04262	-0.25621	0.90521	0.98878	0.79779	0.93661	-0.17802	-1.0705	0.53377	0.9061	0.2844	0.65679
Emc1	4	-0.54018	-2.2462	0.091323	0.47966	0.024689	0.2354	-0.46717	-1.9457	0.14435	0.5919	0.051694	0.35618
Rala	4	0.42741	1.7337	0.066239	0.40992	0.082967	0.49093	-0.10493	-0.4252	0.71026	0.95841	0.67069	0.86811
Sp8	4	0.10529	0.637	0.62444	0.93018	0.52413	0.83328	0.21295	1.289	0.39492	0.83766	0.1974	0.59822
Gm8289	15	-0.23866	-1.6325	0.12936	0.55616	0.10258	0.53972	-0.20016	-1.3717	0.20158	0.67858	0.17015	0.57596
Xndc1	4	0.18724	0.81924	0.3999	0.84584	0.41265	0.78944	0.069504	0.30416	0.7807	0.973	0.76101	0.90914
Olfr215	4	0.17972	1.2046	0.41975	0.85898	0.22835	0.68536	-0.034534	-0.23147	0.90846	0.99297	0.81695	0.93241
Fam63b	4	0.1733	0.63493	0.4353	0.86411	0.52547	0.83328	0.41246	1.5127	0.10311	0.51161	0.13036	0.53414
Sema6c	4	-0.037717	-0.15587	0.91964	0.98935	0.87614	0.96508	0.13386	0.55379	0.59134	0.92557	0.57972	0.82527
Rpl36-ps8	1	-1.774	-1.938	0.069575	0.42152	0.05262	0.38143	-1.8085	-2.0014	0.071438	0.42544	0.04535	0.32888
Atp2c1	4	0.14773	0.83353	0.50279	0.89333	0.40455	0.78741	0.36292	2.0487	0.15011	0.6009	0.040493	0.30446
Ptchd2	4	0.25566	0.82495	0.25725	0.73636	0.4094	0.78822	0.32616	1.053	0.19439	0.67211	0.29233	0.66159
Hand1	4	0.13296	0.83284	0.54542	0.91176	0.40494	0.78769	0.13237	0.82933	0.5955	0.92653	0.40692	0.7333
Mtpap	4	-0.44871	-2.212	0.14734	0.58899	0.026965	0.25179	-0.30526	-1.5066	0.30863	0.78437	0.13191	0.53577
Vmn1r187	8	0.20461	1.0753	0.19833	0.66444	0.28222	0.72305	0.12728	0.66877	0.47489	0.88067	0.50364	0.78886
Higd1b	4	-0.33357	-1.8727	0.26457	0.74033	0.061115	0.41737	-0.19366	-1.0893	0.50015	0.88811	0.27604	0.65128
Aasdhppt	4	-2.6189	-5.3994	0	0	6.6859e-08	2.6496e-05	-1.2656	-2.7096	0.0012997	0.035461	0.0067366	0.084466
Eny2	4	-1.09	-4.1841	0.0035524	0.068106	2.8635e-05	0.0018412	-0.78997	-3.0433	0.02504	0.23486	0.0023398	0.037929
Slc25a18	4	-0.0023094	-0.012088	0.9666	0.99656	0.99036	0.99748	-0.035008	-0.18333	0.90703	0.99297	0.85454	0.94785
Crtap	4	-0.12104	-0.56487	0.68085	0.94243	0.57216	0.85466	0.23397	1.0948	0.34792	0.8122	0.27362	0.64979
Hspa12b	4	-0.047437	-0.27741	0.88979	0.9866	0.78146	0.93324	0.33998	1.9908	0.17645	0.64697	0.046499	0.33375
NO_SITE_505	1	0.44791	0.73116	0.27912	0.75507	0.46468	0.80852	0.49868	0.81435	0.26912	0.74982	0.41545	0.73898
Isca1	4	-0.54122	-2.4378	0.090846	0.47888	0.014778	0.16456	-0.6667	-3.0055	0.049647	0.35229	0.0026511	0.041545
Mcu	4	-0.0068131	-0.031404	0.98098	0.99882	0.97495	0.9931	0.31648	1.4601	0.20747	0.68522	0.14426	0.54915
Ttc30b	5	0.022061	0.11161	0.87133	0.98285	0.91114	0.97523	0.17132	0.86759	0.45003	0.86726	0.38562	0.72063
Scp2d1	4	0.11019	0.72777	0.61093	0.92796	0.46676	0.80852	-0.01083	-0.071536	0.97565	0.99784	0.94297	0.98016
Olfr172	5	0.036336	0.27482	0.82021	0.97489	0.78346	0.93376	-0.064619	-0.48889	0.8135	0.97919	0.62492	0.84781
Slc1a6	4	0.1456	0.86576	0.50921	0.89618	0.38662	0.77967	0.091079	0.5417	0.71598	0.95987	0.58803	0.82967
Rasa2	4	0.12017	0.44552	0.58147	0.92077	0.65594	0.88622	0.20039	0.74342	0.42278	0.8524	0.45722	0.76275
Olfm3	4	0.072359	0.37139	0.72712	0.95832	0.71035	0.90759	0.17475	0.89732	0.48404	0.88338	0.36955	0.71145
Arhgef26	4	0.27658	0.75851	0.22259	0.69734	0.44814	0.80321	0.66659	1.8295	0.014036	0.16331	0.067328	0.41326
Zbtb7c	4	-0.11325	-0.51375	0.70294	0.95134	0.60743	0.86699	-0.11957	-0.54281	0.67166	0.95123	0.58726	0.8293
BC049352	4	0.19362	1.0563	0.38401	0.83385	0.29085	0.72704	-0.16494	-0.89974	0.56366	0.91663	0.36826	0.71031
NO_SITE_5	1	0.34303	0.67805	0.41333	0.85548	0.49774	0.82096	0.4586	0.90671	0.30711	0.78386	0.36456	0.70795
Trip12	4	1.069	1.9437	0.00012997	0.0070922	0.051926	0.37872	0.54596	0.99249	0.03847	0.30536	0.32096	0.68081
Rgs7	4	0.15409	0.95569	0.4856	0.88693	0.33923	0.75353	0.011106	0.068888	0.9588	0.99711	0.94508	0.98066
Ssh3	4	0.71812	1.9253	0.0048087	0.082651	0.054197	0.38852	0.35276	0.94545	0.16194	0.62342	0.34443	0.69582
Gm3417	8	-0.018591	-0.12446	0.99601	0.99926	0.90095	0.97248	-0.10939	-0.7327	0.60876	0.93173	0.46374	0.76706
LOC108168593	6	-0.13246	-0.68696	0.59091	0.92212	0.49211	0.81814	-0.071965	-0.37367	0.76706	0.96982	0.70865	0.88646
Cyp2r1	4	0.18395	1.2975	0.40853	0.85219	0.19446	0.65889	0.074101	0.52269	0.76572	0.96982	0.60119	0.83603
D130040H23Rik	4	0.28723	1.3227	0.20565	0.6764	0.18593	0.65145	-0.076026	-0.3501	0.7898	0.97419	0.72626	0.89392
Hyal5	4	0.049903	0.24113	0.79743	0.97335	0.80946	0.94204	0.25048	1.2111	0.31491	0.78848	0.22586	0.6143
Krt1	4	-0.13716	-0.7052	0.63865	0.93295	0.48068	0.81406	0.083794	0.43143	0.73864	0.96442	0.66616	0.86657
Zranb2	4	-0.60771	-2.3517	0.063207	0.39951	0.018686	0.19247	-0.947	-3.6647	0.0091409	0.1265	0.00024762	0.0070478
Rxrg	4	0.1167	0.62088	0.59217	0.92246	0.53468	0.83752	0.1864	0.99241	0.45544	0.87187	0.321	0.68081
LOC108168530	6	-0.13246	-0.68696	0.59091	0.92212	0.49211	0.81814	-0.071965	-0.37367	0.76706	0.96982	0.70865	0.88646
Aes	4	-0.10953	-0.56985	0.71351	0.95468	0.56878	0.85392	-0.20367	-1.0598	0.47849	0.8815	0.28924	0.65999
Bhmt	4	0.28798	1.1868	0.20435	0.67462	0.2353	0.68839	0.11519	0.47475	0.64428	0.94098	0.63497	0.85265
Unc80	4	-0.033158	-0.21299	0.93402	0.99067	0.83133	0.95005	0.021935	0.14095	0.92592	0.99297	0.88791	0.95965
Ints3	4	-0.67692	-1.8381	0.041892	0.3245	0.066046	0.4333	-0.88564	-2.4021	0.01356	0.16035	0.016302	0.16143
Slc6a11	4	0.19907	1.1023	0.37014	0.82284	0.27033	0.71438	0.11145	0.61729	0.65624	0.94622	0.53704	0.80387
Vmn2r-ps51	9	-0.22367	-1.1064	0.27098	0.74731	0.26857	0.71347	-0.085533	-0.42501	0.6721	0.95126	0.67083	0.86811
Nop14	4	-1.4683	-4.8555	0.00025993	0.010949	1.2008e-06	0.00018603	-0.36571	-1.2325	0.23511	0.71943	0.21776	0.60714
Actr1b	4	0.068181	0.38794	0.74029	0.96044	0.69806	0.90154	0.027985	0.1593	0.90733	0.99297	0.87343	0.95548
Hmgcr	4	-0.13893	-0.46616	0.63514	0.93192	0.6411	0.88077	-0.050792	-0.17072	0.86141	0.98666	0.86445	0.95151
Drd3	4	0.15562	0.76762	0.48165	0.8854	0.44271	0.80125	0.18455	0.91065	0.46012	0.8738	0.36248	0.70696
Rnf19b	4	0.35819	1.398	0.11775	0.53267	0.16211	0.62572	0.37173	1.4514	0.14006	0.58333	0.14666	0.55289
4930415F15Rik	4	-0.048373	-0.31127	0.88697	0.98655	0.7556	0.92453	-0.051315	-0.33041	0.85972	0.98633	0.74109	0.90044
Gm12235	1	-0.75874	-1.7918	0.23645	0.71552	0.073165	0.46068	0.084834	0.20133	0.88307	0.99029	0.84044	0.94221
Rnf170	4	0.055811	0.3045	0.77979	0.97098	0.76075	0.92638	-0.089011	-0.48583	0.75389	0.96766	0.62709	0.84896
Eif3h	4	-1.1893	-3.4801	0.0019062	0.046316	0.00050119	0.013955	-0.92942	-2.7387	0.010484	0.1375	0.0061688	0.07902
Bola2	4	0.047631	0.1623	0.80518	0.97432	0.87107	0.96381	-0.036138	-0.12318	0.90365	0.99297	0.90196	0.96396
Gm595	4	-0.31765	-1.5418	0.2861	0.76171	0.12311	0.57618	0.11559	0.56212	0.64333	0.94059	0.57403	0.82276
Prph	4	0.10264	0.43094	0.63254	0.93113	0.66651	0.89012	-0.088704	-0.37256	0.75462	0.96772	0.70947	0.88675
Calm3	4	-0.11443	-0.42357	0.6993	0.94981	0.67188	0.89122	0.072649	0.26964	0.77031	0.97033	0.78744	0.91991
Dpp3	4	-0.05484	-0.28195	0.867	0.98099	0.77798	0.93273	-0.034438	-0.17716	0.90876	0.99297	0.85938	0.94973
Fbxo30	4	-0.1249	-0.61121	0.67028	0.94016	0.54106	0.84063	0.10133	0.49666	0.68488	0.95489	0.61943	0.84575
Slc17a8	4	0.016298	0.075963	0.90465	0.98878	0.93945	0.98399	0.24554	1.1452	0.32522	0.79601	0.25211	0.6333
Gpr107	4	0.14578	0.54965	0.50856	0.89618	0.58256	0.85788	0.1601	0.60395	0.52138	0.89944	0.54588	0.80867
Tesc	4	0.2615	0.98759	0.2478	0.72811	0.32335	0.74305	0.21806	0.82374	0.38466	0.83422	0.41009	0.73538
Defb45	4	0.053869	0.28931	0.78651	0.97183	0.77234	0.92962	-0.05579	-0.29971	0.84686	0.9834	0.7644	0.91029
Fign	4	0.25533	1.515	0.25785	0.73667	0.12977	0.58599	0.18566	1.1019	0.45722	0.87245	0.27051	0.64799
Slc25a26	4	-1.654	-3.9512	8.6644e-05	0.0049383	7.7763e-05	0.0037087	-1.7695	-4.2273	0.00021661	0.012195	2.3654e-05	0.0012679
Olfr523	4	-0.16387	-0.67411	0.57462	0.91879	0.50024	0.82244	0.0078275	0.032229	0.96872	0.99711	0.97429	0.99144
Ifnar1	4	0.075327	0.16576	0.71758	0.95613	0.86834	0.96381	0.09822	0.21621	0.69467	0.95509	0.82882	0.93797
Plat	4	0.50493	1.3108	0.032881	0.2831	0.18993	0.65533	0.54193	1.4073	0.039943	0.3135	0.15935	0.56427
Ap1g2	4	0.40404	1.8094	0.080405	0.45557	0.070381	0.45041	0.13486	0.60378	0.58853	0.92506	0.54599	0.80867
Mbp	4	0.066626	0.42203	0.74557	0.96194	0.673	0.89151	0.0074831	0.047414	0.96976	0.99711	0.96218	0.98663
NO_SITE_849	1	-0.12598	-0.38281	0.7626	0.96674	0.70186	0.90319	0.16253	0.49429	0.73998	0.96445	0.6211	0.84655
Sesn2	4	-0.20427	-1.8149	0.48317	0.88607	0.069535	0.44697	-0.029762	-0.26459	0.92241	0.99297	0.79132	0.92099
Olfr806	5	0.06489	0.34939	0.71875	0.95624	0.72679	0.91348	0.089712	0.48322	0.68765	0.95489	0.62894	0.84989
Tns3	4	-0.22081	-0.94056	0.44908	0.86989	0.34693	0.75735	0.036338	0.15499	0.88286	0.99029	0.87683	0.95719
Ercc8	4	0.25069	1.4574	0.26548	0.74126	0.14502	0.60884	-0.11976	-0.69625	0.67106	0.95123	0.48627	0.77956
Kpnb1	4	-0.31223	-0.92774	0.29277	0.76588	0.35354	0.76106	-0.64677	-1.9134	0.055452	0.37372	0.055695	0.37135
Tmem201	4	0.13645	0.76154	0.53464	0.90803	0.44633	0.80218	-0.082867	-0.46255	0.77074	0.97033	0.64369	0.85653
Olfr836	4	0.10633	0.55492	0.62176	0.9298	0.57895	0.85705	0.10527	0.54995	0.67387	0.95219	0.58235	0.82654
Pde7a	4	-0.18987	-0.90627	0.51549	0.89865	0.36479	0.76553	-0.36762	-1.7548	0.2329	0.71703	0.079289	0.44477
Tas2r105	4	-0.053915	-0.30921	0.8699	0.982	0.75716	0.92504	-0.27187	-1.5593	0.35645	0.81783	0.11893	0.5168
Nup54	4	-1.3865	-3.775	0.00043322	0.016393	0.00015999	0.0061057	-1.1465	-3.1729	0.0029459	0.061552	0.0015094	0.027177
LOC102633332	4	-0.80549	-2.0188	0.019971	0.20691	0.043512	0.33944	-1.1692	-2.9369	0.002426	0.054528	0.0033149	0.048862
Tha1	4	-0.071066	-0.50089	0.82138	0.97489	0.61645	0.87041	-0.34817	-2.4536	0.25439	0.73831	0.014145	0.14854
Ythdf1	4	0.18559	0.72501	0.40402	0.84954	0.46844	0.80991	-0.15498	-0.60549	0.58567	0.92419	0.54485	0.80812
Gm13304	8	-0.15621	-0.82436	0.47195	0.88057	0.40973	0.78822	-0.51665	-2.7213	0.024823	0.23397	0.0065028	0.082068
Gm38538	3	-1.4478	-2.4251	0.0023394	0.052427	0.015303	0.16824	-0.28177	-0.50839	0.40866	0.84616	0.61118	0.84194
Il17ra	4	-0.1202	-0.76594	0.68366	0.94311	0.44371	0.80161	-0.042126	-0.26871	0.88576	0.99047	0.78815	0.92014
Vmn1r-ps79	22	-0.2791	-1.8727	0.033401	0.28545	0.061111	0.41737	-0.14146	-0.95418	0.27696	0.75661	0.33999	0.69297
4921524L21Rik	4	0.21648	0.73213	0.33172	0.79659	0.46409	0.80852	0.29007	0.9817	0.24724	0.73279	0.32625	0.6845
Pinlyp	4	0.046835	0.18085	0.80795	0.97463	0.85649	0.95999	0.49824	1.9262	0.054586	0.37004	0.054084	0.36454
Cmtr2	4	-0.89253	-2.1104	0.012043	0.15117	0.034826	0.29698	-0.49295	-1.1785	0.12628	0.55939	0.23858	0.62318
Gm17241	6	-0.85942	-3.0781	0.0030759	0.062063	0.0020834	0.038877	-1.0091	-3.6138	0.00090976	0.028649	0.00030168	0.0081735
Gins2	4	-1.6077	-3.577	8.6644e-05	0.0049383	0.00034755	0.010814	-2.4201	-5.362	4.3322e-05	0.004878	8.2301e-08	1.7199e-05
H2afb1	5	0.18208	0.95225	0.36876	0.82251	0.34097	0.75415	-0.042019	-0.21976	0.88364	0.99044	0.82606	0.937
Clu	4	-0.31129	-1.7567	0.29398	0.76661	0.078964	0.48078	-0.36487	-2.0599	0.23623	0.7202	0.039404	0.30048
Glul	4	0.40054	1.0818	0.082615	0.45951	0.27935	0.72157	0.32584	0.88014	0.19465	0.67271	0.37878	0.71661
Cldn10	4	0.39974	1.6579	0.083048	0.45951	0.097347	0.52902	0.42332	1.7559	0.095092	0.49215	0.079108	0.44451
Apoc1	4	0.054882	0.39901	0.78287	0.97157	0.68988	0.89848	0.12291	0.89432	0.62336	0.93618	0.37115	0.71299
Fam171a1	4	0.13467	0.58777	0.54048	0.91108	0.55669	0.8479	0.1421	0.62042	0.56834	0.91839	0.53498	0.80252
Krt2	4	0.088073	0.28245	0.67591	0.9409	0.7776	0.93253	0.20314	0.65251	0.41637	0.84933	0.51407	0.79339
Bbx	4	0.41075	1.6099	0.076203	0.44141	0.10742	0.54887	0.54648	2.1424	0.038383	0.3052	0.032164	0.26309
Cadm4	4	0.20159	0.84184	0.36499	0.82032	0.39988	0.78374	0.084904	0.35463	0.73509	0.96354	0.72287	0.89341
Slfn4	4	0.058047	0.34483	0.77243	0.9695	0.73022	0.91463	-0.077635	-0.46135	0.78612	0.97371	0.64454	0.85689
Kctd20	4	0.18071	0.67929	0.41706	0.85788	0.49696	0.82066	0.17744	0.66733	0.47788	0.88143	0.50456	0.78921
Trpv4	4	0.64104	1.5092	0.0094875	0.13137	0.13125	0.58838	0.4668	1.0989	0.069012	0.42069	0.27181	0.64892
Scgb2b31-ps	1	-0.9383	-2.376	0.18394	0.64372	0.017502	0.18372	-0.49497	-1.2574	0.37647	0.82953	0.2086	0.60401
Urod	4	-1.1112	-3.4218	0.0031192	0.062827	0.00062201	0.016213	-1.6139	-4.956	0.00021661	0.012195	7.1963e-07	9.0772e-05
Olfr714	4	0.17857	0.97664	0.42248	0.8591	0.32875	0.74579	0.29017	1.5884	0.24698	0.73221	0.1122	0.50746
Clstn2	4	0.2152	1.0338	0.33427	0.79752	0.30125	0.7319	0.246	1.1822	0.32392	0.79492	0.23711	0.62203
Nudt2	4	0.021588	0.074246	0.8878	0.98655	0.94081	0.98403	0.3127	1.076	0.21223	0.69192	0.28194	0.65585
Slc6a20b	4	0.09575	0.55818	0.65364	0.93764	0.57672	0.85622	0.13568	0.79161	0.5858	0.92427	0.42859	0.74682
Agpat4	4	0.35404	0.97889	0.12173	0.54028	0.32763	0.74552	0.38819	1.0737	0.12308	0.55251	0.28294	0.65633
Gm6642	1	-0.19745	-0.55555	0.65841	0.93844	0.57852	0.85705	-0.8122	-2.2859	0.23329	0.71735	0.022258	0.20275
Plg	4	0.23586	0.87902	0.29342	0.76614	0.37939	0.775	0.23892	0.89085	0.33826	0.80505	0.37301	0.71318
LOC108168602	17	0.099361	0.94518	0.33423	0.79752	0.34457	0.75637	0.11607	1.1047	0.34554	0.81073	0.2693	0.64686
NO_SITE_382	1	0.088733	0.503	0.84967	0.9799	0.61496	0.86985	0.13432	0.76181	0.78911	0.97418	0.44617	0.75529
Oscar	4	0.39644	0.99905	0.084781	0.46257	0.31777	0.74047	0.47078	1.1869	0.067236	0.41482	0.23525	0.62184
Tssk3	4	-0.0027103	-0.012112	0.96781	0.99688	0.99034	0.99748	0.10412	0.46575	0.67708	0.95328	0.6414	0.85545
Fcgrt	4	0.40871	1.531	0.077416	0.44575	0.12577	0.5798	0.22672	0.84917	0.36421	0.8222	0.39579	0.72645
NO_SITE_477	1	0.35583	0.8454	0.39653	0.84453	0.39789	0.78274	0.54012	1.2836	0.23247	0.71614	0.19929	0.59837
Klhl17	4	0.032434	0.209	0.85232	0.98019	0.83445	0.95166	0.017352	0.11186	0.93957	0.99487	0.91093	0.96731
Irf4	4	0.15892	1.0944	0.47264	0.88057	0.27379	0.71776	-0.10577	-0.72835	0.70823	0.95793	0.4664	0.76845
Gm11953	1	-1.3455	-1.2824	0.11515	0.52896	0.19972	0.66045	-1.2845	-1.2387	0.13096	0.56378	0.21545	0.60485
Gm2863	31	-0.20928	-1.9709	0.062427	0.39731	0.048741	0.3641	-0.28996	-2.7301	0.0092276	0.12732	0.0063309	0.080471
Drg2	4	0.1148	0.52442	0.59715	0.92348	0.59999	0.86457	-0.51359	-2.3368	0.11363	0.53476	0.019448	0.18474
Faiml	4	0.40048	2.0347	0.082702	0.45951	0.041885	0.33159	0.1373	0.6974	0.58116	0.92318	0.48555	0.77914
Chmp6	4	-1.0348	-3.0471	0.0048954	0.083704	0.0023108	0.042033	-1.4277	-4.1938	0.00060651	0.022329	2.7428e-05	0.00141
Gm15363	3	0.1952	0.79914	0.4463	0.869	0.42421	0.79333	0.20917	0.85684	0.46788	0.87886	0.39154	0.72418
Fbxo41	4	0.53392	1.2555	0.02504	0.23993	0.20928	0.66931	0.61542	1.4475	0.021401	0.21348	0.14775	0.55327
Ticam2	4	0.17978	0.6405	0.41953	0.85898	0.52185	0.83239	0.22953	0.81816	0.35784	0.81842	0.41326	0.73806
NO_SITE_213	1	0.23916	0.98088	0.57648	0.9188	0.32665	0.74544	0.33785	1.3858	0.45263	0.86972	0.16582	0.57077
Mrap2	4	0.22598	1.3493	0.31365	0.7838	0.17725	0.64044	0.15357	0.91713	0.53832	0.9084	0.35907	0.70473
Smim13	4	-0.20165	-1.0481	0.48858	0.88754	0.29458	0.72933	0.032148	0.16735	0.89503	0.99118	0.8671	0.95268
Cfdp1	4	-0.23354	-0.80044	0.423	0.8591	0.42345	0.79333	-0.33772	-1.1578	0.26691	0.74849	0.24693	0.63024
Rdh11	4	-0.16859	-0.62747	0.56375	0.91619	0.53035	0.83541	0.14546	0.54226	0.55859	0.91518	0.58764	0.82948
3632451O06Rik	4	-0.021301	-0.12797	0.97102	0.99746	0.89817	0.97194	-0.012898	-0.077521	0.96898	0.99711	0.93821	0.97848
Ypel5	4	-1.1294	-3.7422	0.002686	0.057567	0.00018239	0.0067503	-0.7604	-2.535	0.029242	0.25857	0.011243	0.12447
NO_SITE_658	1	0.55174	0.90504	0.19005	0.65205	0.36544	0.76553	0.19758	0.32413	0.67764	0.95355	0.74584	0.90321
Fbxw5	4	0.22004	1.0928	0.32552	0.79379	0.27447	0.71794	-0.24776	-1.2298	0.39726	0.83884	0.21878	0.60793
Med29	4	-0.92131	-2.895	0.010311	0.13702	0.0037915	0.060116	-1.3027	-4.0574	0.0011264	0.032704	4.9629e-05	0.0021821
Olfr868	4	0.37843	1.7843	0.098861	0.4948	0.074372	0.46449	0.22315	1.0523	0.37287	0.82794	0.29266	0.66166
Nodal	4	0.43802	1.1772	0.060607	0.39342	0.23911	0.69086	0.25136	0.67544	0.31335	0.78648	0.49939	0.7868
Srrm3	4	0.34148	1.1014	0.13538	0.56674	0.27072	0.71484	0.33288	1.074	0.18585	0.66214	0.28283	0.65633
Pan2	4	0.726	1.5652	0.0045921	0.080877	0.11753	0.56597	0.18654	0.40061	0.4551	0.87164	0.68871	0.87758
Dio2	4	-0.0029417	-0.014512	0.96846	0.99692	0.98842	0.99692	0.33913	1.6756	0.17749	0.64867	0.093817	0.47282
Znrf4	4	0.56102	1.5725	0.019322	0.20126	0.11582	0.56258	0.19455	0.54536	0.43608	0.85986	0.58551	0.82804
Pld6	4	0.032233	0.17354	0.85301	0.98019	0.86223	0.96224	-0.15168	-0.81643	0.59368	0.92558	0.41425	0.73842
Myo7b	4	0.34739	1.3553	0.1288	0.55487	0.17533	0.63795	0.25318	0.988	0.31066	0.78535	0.32315	0.68215
LOC108167785	1	-1.3303	-2.4364	0.11797	0.53267	0.014835	0.16456	-0.93298	-1.7268	0.1998	0.67684	0.084195	0.45572
Areg	4	0.18931	0.53753	0.39458	0.84216	0.5909	0.86145	0.5505	1.5637	0.036824	0.29951	0.1179	0.51495
LOC102635786	1	0.69724	1.1802	0.10835	0.51833	0.23793	0.68983	0.30691	0.51952	0.49751	0.88714	0.60339	0.83743
Actn2	4	0.24375	1.1853	0.27865	0.75452	0.23588	0.68844	0.24634	1.1985	0.32318	0.79411	0.23072	0.61769
Stil	4	-0.73531	-2.635	0.030239	0.27065	0.0084133	0.1096	-0.95187	-3.4113	0.008881	0.12454	0.00064648	0.014308
Slc46a3	4	0.12571	0.51449	0.56669	0.91682	0.60691	0.86699	0.2826	1.1574	0.25928	0.74403	0.24712	0.63035
Gm8893	5	-0.018692	-0.091486	0.99034	0.99909	0.92711	0.98005	-0.37427	-1.8295	0.17888	0.65157	0.067318	0.41326
Klhdc7a	4	0.11743	0.72159	0.59017	0.92212	0.47054	0.8104	0.3124	1.9205	0.21262	0.69192	0.054796	0.36812
Umodl1	4	0.0941	0.85255	0.65854	0.93851	0.39391	0.78115	0.16834	1.5259	0.49868	0.88744	0.12703	0.52909
Plekhn1	4	0.29805	1.139	0.18966	0.65154	0.25468	0.70306	0.24373	0.93167	0.3289	0.7979	0.35151	0.6996
Pias3	4	-0.0011937	-0.0092174	0.96188	0.99534	0.99265	0.99782	-0.10234	-0.79042	0.7175	0.96011	0.42928	0.7472
Mavs	4	-0.13371	-0.95989	0.64684	0.93588	0.33711	0.75242	0.16306	1.1719	0.51358	0.89542	0.24124	0.62619
Lipc	4	-0.074054	-0.46659	0.81302	0.97472	0.64079	0.88066	0.1665	1.0503	0.5034	0.88864	0.2936	0.66262
Col24a1	4	0.20091	1.2794	0.36646	0.82146	0.20077	0.66149	0.13488	0.8591	0.58844	0.92506	0.39029	0.72321
Ttc23	4	0.083665	0.47862	0.69029	0.94564	0.63221	0.87715	0.13063	0.74781	0.60018	0.92805	0.45457	0.76111
NO_SITE_859	1	0.065182	0.19003	0.89321	0.98717	0.84929	0.95749	0.10613	0.31391	0.84261	0.98287	0.75359	0.90631
Jrk	4	0.19554	0.98155	0.37894	0.82981	0.32632	0.74538	-0.053812	-0.26979	0.85201	0.9841	0.78732	0.9199
Cnnm3	4	-0.21198	-1.0628	0.46658	0.87956	0.28789	0.72561	-0.28089	-1.4093	0.34372	0.80905	0.15876	0.56402
Vps37b	4	0.29616	1.0282	0.19239	0.65584	0.30388	0.73275	0.39666	1.378	0.11558	0.53943	0.1682	0.57353
Pold2	4	-1.4904	-3.2794	0.00017329	0.008316	0.0010402	0.024011	-0.9867	-2.2449	0.0074514	0.11133	0.024774	0.21893
Lao1	4	0.27309	1.3963	0.22809	0.70435	0.16263	0.62602	-0.15239	-0.77906	0.59225	0.92558	0.43594	0.74986
Sipa1l2	4	0.23209	1.6397	0.30178	0.77339	0.10108	0.53611	-0.10368	-0.7323	0.71369	0.95935	0.46399	0.76715
Saa4	4	0.076703	0.45145	0.7136	0.95468	0.65166	0.88522	0.16245	0.95651	0.51501	0.896	0.33881	0.69256
NO_SITE_951	1	-0.047935	-0.13472	0.89542	0.98764	0.89283	0.9703	-0.0090875	-0.025562	0.94944	0.99573	0.97961	0.99251
Pik3ca	4	-0.15483	-0.53232	0.59615	0.92334	0.5945	0.86324	-0.21903	-0.75319	0.44942	0.86688	0.45134	0.7586
Oxct2b	4	-0.080959	-0.38557	0.79318	0.97322	0.69982	0.90225	0.026981	0.12861	0.91015	0.99297	0.89766	0.96249
Kcnj16	4	0.27052	0.96632	0.23199	0.70852	0.33388	0.75062	0.327	1.1689	0.19304	0.66977	0.24246	0.62677
Tmem253	4	0.27451	0.86841	0.22579	0.70167	0.38517	0.77845	-0.065642	-0.20756	0.81943	0.98052	0.83558	0.94086
Olfr16	4	-0.071936	-0.26753	0.81865	0.97489	0.78906	0.93506	0.29074	1.0855	0.24624	0.73194	0.27768	0.65285
Dffa	4	0.44152	2.0656	0.058268	0.38788	0.038868	0.31815	0.15519	0.72571	0.53481	0.90652	0.46802	0.76935
NO_SITE_3	1	0.23265	0.51488	0.58836	0.92212	0.60664	0.86699	0.6208	1.3758	0.17441	0.64396	0.16889	0.57416
Rwdd2a	4	-0.020156	-0.10654	0.97492	0.99823	0.91515	0.97692	-0.33736	-1.7806	0.26738	0.74849	0.074984	0.43423
Olfr713	4	-0.047787	-0.09898	0.8884	0.98655	0.92115	0.97847	0.023929	0.049615	0.91877	0.99297	0.96043	0.98592
Fanci	4	-0.62719	-3.2731	0.056145	0.38176	0.0010636	0.024332	-0.60823	-3.1791	0.067669	0.41587	0.0014772	0.026764
Pisd	4	-1.5786	-4.0782	8.6644e-05	0.0049383	4.5381e-05	0.0025268	-1.0698	-2.8156	0.0045488	0.082298	0.0048692	0.065575
LOC108168509	8	-0.12291	-0.70945	0.57631	0.91879	0.47804	0.81259	-0.024446	-0.14133	0.92969	0.99297	0.88761	0.95954
Rgs11	4	0.075365	0.52224	0.71732	0.95595	0.6015	0.86502	0.0013935	0.0096595	0.9877	0.99847	0.99229	0.99722
Ibsp	4	-0.047512	-0.19117	0.88949	0.98655	0.84839	0.95749	0.12424	0.50165	0.61959	0.93526	0.61591	0.84373
LOC108168549	17	0.039285	0.39363	0.63224	0.93113	0.69386	0.89888	0.04401	0.44115	0.69194	0.95489	0.6591	0.86239
Purb	4	-0.14927	-0.71901	0.60911	0.92759	0.47213	0.81103	-0.45096	-2.1704	0.15574	0.61233	0.029973	0.25032
Yipf5	4	-0.1862	-0.77159	0.52363	0.90252	0.44036	0.80038	-0.24142	-1.001	0.40796	0.8455	0.31685	0.67751
Slain1	4	0.20647	0.58359	0.35394	0.81372	0.5595	0.84966	0.20999	0.59376	0.40172	0.84223	0.55267	0.81193
Fto	4	-0.34918	-1.949	0.24468	0.72494	0.051299	0.37556	-0.15866	-0.88752	0.57748	0.92136	0.3748	0.71411
Bccip	4	0.089162	0.21391	0.6724	0.94048	0.83062	0.95005	0.37167	0.89396	0.14015	0.58341	0.37135	0.7131
Usp30	4	0.053595	0.37117	0.78716	0.97183	0.71051	0.90759	0.00018728	0.0012979	0.99069	0.99856	0.99896	0.99948
Fam84b	4	0.080212	0.61166	0.70177	0.95076	0.54076	0.84048	0.0038724	0.029542	0.98094	0.99802	0.97643	0.99172
Slc5a10	4	0.17204	0.95126	0.43872	0.86682	0.34147	0.75417	-0.01759	-0.097268	0.95547	0.99684	0.92251	0.97271
Sestd1	4	0.27911	1.0478	0.21843	0.69115	0.29472	0.72933	0.34416	1.2925	0.17212	0.64122	0.19618	0.59688
Itgb1bp2	4	-0.15601	-0.65419	0.59286	0.92255	0.51299	0.82862	0.35786	1.5029	0.15557	0.61213	0.13286	0.53587
Sult2a5	4	0.4456	1.828	0.056622	0.38328	0.067544	0.43859	0.34216	1.4041	0.17424	0.64393	0.16029	0.565
Adssl1	4	0.33394	1.2361	0.14457	0.58575	0.21641	0.67595	0.27964	1.0355	0.26448	0.74816	0.30043	0.66727
Zfp341	4	-0.062483	-0.42817	0.84434	0.97896	0.66853	0.89022	0.059732	0.40971	0.80995	0.9783	0.68202	0.87427
Fut8	4	-0.05137	-0.22448	0.87805	0.9847	0.82238	0.94633	0.22649	0.99168	0.36477	0.8225	0.32135	0.68103
Ephb3	4	0.32374	1.0153	0.1557	0.59907	0.30998	0.7356	0.24453	0.76716	0.32708	0.79604	0.44299	0.75418
NO_SITE_663	1	0.59509	0.56635	0.16033	0.60778	0.57116	0.85466	1.0349	0.98545	0.041676	0.32099	0.3244	0.6826
Scin	4	0.089382	0.46033	0.6721	0.94047	0.64528	0.88267	0.30893	1.5929	0.21765	0.69889	0.11119	0.50642
Rasgef1a	4	-0.14485	-0.73603	0.62046	0.9298	0.46171	0.80846	-0.16763	-0.85197	0.55773	0.91518	0.39423	0.72597
Trf	4	0.36089	1.633	0.1155	0.5297	0.10246	0.53938	0.076434	0.3459	0.75861	0.96856	0.72942	0.89583
Vmn2r116	4	0.044247	0.11493	0.81545	0.97483	0.9085	0.97445	0.52016	1.3523	0.046701	0.34266	0.17628	0.58247
Gpr155	4	0.42223	1.7432	0.069315	0.42139	0.081302	0.48758	0.33253	1.3731	0.18654	0.66389	0.16973	0.57574
A430105I19Rik	4	-0.17353	-0.88253	0.55296	0.91371	0.37749	0.77297	-0.10817	-0.55057	0.7019	0.95705	0.58193	0.82654
Zfp874b	4	-0.04016	-0.27947	0.91288	0.98932	0.77988	0.93302	-0.2493	-1.7351	0.39462	0.83755	0.082721	0.45441
Cts8	4	0.097517	0.50659	0.64814	0.93618	0.61244	0.86874	0.010518	0.054659	0.96062	0.99711	0.95641	0.98469
Gm20789	1	-0.58688	-1.7174	0.3059	0.77645	0.085906	0.49986	-0.098476	-0.2902	0.80457	0.97717	0.77166	0.91252
Glt28d2	4	0.13109	0.78225	0.55006	0.91302	0.43407	0.79844	-0.13561	-0.80937	0.6315	0.93719	0.41831	0.74071
Pafah1b1	4	-0.64021	-1.9429	0.05177	0.36556	0.052023	0.37917	-0.98678	-2.9561	0.0074514	0.11133	0.0031157	0.046945
Eef1a1	4	-1.5444	-3.4132	0.00017329	0.008316	0.00064206	0.016634	-1.4197	-3.167	0.00060651	0.022329	0.0015403	0.027541
Olfr697	4	0.15445	0.83706	0.48495	0.88681	0.40256	0.7859	0.04216	0.22855	0.86401	0.98736	0.81922	0.93374
Hoxc12	4	0.27053	0.48505	0.23199	0.70852	0.62764	0.87525	0.64154	1.1522	0.017372	0.18733	0.24922	0.63155
Tmx3	4	0.31745	1.0233	0.16315	0.61191	0.30615	0.73329	0.29152	0.94009	0.24451	0.7292	0.34717	0.69739
NO_SITE_549	1	0.34817	0.80995	0.40593	0.85053	0.41797	0.7915	0.28434	0.6617	0.5323	0.90552	0.50816	0.79125
Dctn2	4	-1.5334	-4.4163	0.00017329	0.008316	1.004e-05	0.00089233	-1.02	-2.9698	0.0061517	0.099301	0.0029804	0.045351
Dsc1	4	0.43127	1.7119	0.063986	0.40229	0.086923	0.50293	0.065396	0.25957	0.79309	0.97472	0.79519	0.92258
Bcl2l14	4	0.23295	1.2546	0.29987	0.77151	0.20963	0.66947	0.091634	0.49359	0.71425	0.95977	0.62159	0.84663
Btbd7	4	-0.29846	-1.5749	0.313	0.78328	0.11528	0.56237	-0.39177	-2.0695	0.20613	0.68318	0.038498	0.29621
Hnrnph3	4	-0.010706	-0.059718	0.99424	0.99909	0.95238	0.98761	0.061641	0.34417	0.80405	0.97689	0.73071	0.89599
H1f0	4	0.24944	0.93367	0.26777	0.74425	0.35048	0.75925	0.38905	1.4575	0.12251	0.55224	0.14499	0.54999
Lcorl	4	-0.20056	-1.1521	0.4911	0.88823	0.24929	0.69855	-0.19064	-1.096	0.50643	0.89116	0.27306	0.64932
Txnrd2	4	-0.011068	-0.10291	0.99562	0.99926	0.91804	0.97755	-0.032232	-0.29992	0.91548	0.99297	0.76424	0.91029
Olfr1472	4	-0.049112	-0.23531	0.88485	0.98655	0.81397	0.9436	-0.2058	-0.98629	0.4752	0.88067	0.32399	0.68253
Hist1h4f	9	-0.57593	-2.1079	0.0082745	0.12119	0.035041	0.29825	-0.63997	-2.3393	0.0050687	0.086731	0.019321	0.18391
Mfsd4b3	4	0.12647	0.65009	0.56453	0.91619	0.51563	0.83019	0.27276	1.4026	0.27639	0.75661	0.16072	0.56562
4930435E12Rik	4	0.2342	0.99631	0.29702	0.76821	0.3191	0.74075	0.30631	1.3039	0.22116	0.70375	0.19228	0.59389
Pcdha7	4	0.087065	0.48403	0.67911	0.94167	0.62836	0.87535	0.17422	0.96895	0.48529	0.88364	0.33257	0.6892
Kif2a	4	-0.16969	-0.80427	0.56171	0.91587	0.42124	0.79284	0.073085	0.34675	0.76914	0.97033	0.72878	0.89563
Lbp	4	-0.16711	-0.82986	0.56678	0.91682	0.40662	0.78822	0.24787	1.2344	0.32037	0.79243	0.21705	0.60634
LOC102638674	3	-0.6812	-2.1842	0.072954	0.43213	0.028945	0.26232	-0.29841	-0.96001	0.38522	0.83422	0.33705	0.69164
P2rx7	4	0.13254	0.81731	0.54629	0.91176	0.41375	0.79061	0.29203	1.8022	0.24377	0.7287	0.071522	0.42526
Gm6570	1	-0.41188	-0.72983	0.4171	0.85788	0.46549	0.80852	-0.20235	-0.3609	0.65919	0.94757	0.71817	0.89113
P2rx1	4	-0.23836	-1.603	0.41342	0.85548	0.10892	0.5532	-0.027432	-0.18468	0.92882	0.99297	0.85348	0.94743
Gm21180	18	0.076586	0.75267	0.4233	0.8591	0.45165	0.80336	0.10472	1.0297	0.37816	0.82953	0.30315	0.66787
Slc15a1	4	0.27053	0.78775	0.23199	0.70852	0.43084	0.79717	0.57697	1.6813	0.028939	0.25682	0.092706	0.47042
Fetub	4	-0.030623	-0.15464	0.94199	0.99179	0.87711	0.96562	-0.070759	-0.35747	0.80336	0.97688	0.72074	0.89268
Rad21l	4	0.35204	1.331	0.12351	0.54391	0.18318	0.64811	0.38396	1.4523	0.12676	0.56	0.14642	0.55212
Oas1c	4	0.11205	0.50956	0.60482	0.92592	0.61036	0.86753	0.35784	1.6284	0.15557	0.61213	0.10344	0.49271
Arxes1	8	0.05467	0.31829	0.6847	0.9436	0.75027	0.92239	0.27742	1.6163	0.12702	0.56033	0.10603	0.49778
Setd4	4	0.26647	1.644	0.23918	0.71873	0.10017	0.53434	0.055755	0.34397	0.82156	0.98086	0.73087	0.89602
Tnpo3	4	-1.0522	-2.8025	0.0045488	0.080645	0.0050709	0.074177	-0.75836	-2.0372	0.029632	0.25998	0.041633	0.31
Slc22a6	4	-0.18741	-0.39018	0.52064	0.90137	0.6964	0.90058	0.64345	1.3437	0.017069	0.18615	0.17906	0.58351
Irak4	4	0.077217	0.41938	0.71213	0.95462	0.67494	0.89271	-0.091456	-0.49651	0.74743	0.96553	0.61953	0.84575
Gnat1	4	0.12261	0.65776	0.57536	0.91879	0.51069	0.82787	0.031737	0.17033	0.8962	0.99118	0.86475	0.95161
4930552N02Rik	1	0.22421	0.38316	0.60083	0.92475	0.7016	0.90319	0.24003	0.41038	0.60031	0.92807	0.68153	0.87408
Enpp5	4	-0.057042	-0.3816	0.86128	0.98099	0.70276	0.90331	0.31336	2.0991	0.2115	0.6915	0.035807	0.28311
Edc4	4	-0.56197	-2.9903	0.080795	0.45632	0.002787	0.048333	-0.22133	-1.18	0.44461	0.86456	0.23801	0.62265
NO_SITE_635	1	0.7226	1.1053	0.098211	0.49379	0.26902	0.71395	0.47319	0.72386	0.29268	0.77077	0.46915	0.77007
Dclk1	4	0.13672	0.91963	0.53399	0.9077	0.35777	0.76297	-0.0033806	-0.022739	0.99818	0.99944	0.98186	0.99348
Olfr1496	4	0.094798	0.37125	0.65672	0.93813	0.71045	0.90759	0.36737	1.4426	0.14552	0.59336	0.14913	0.55488
Satl1	4	0.072587	0.60338	0.72621	0.958	0.54626	0.84337	0.1326	1.1029	0.59485	0.92614	0.27007	0.64776
LOC105242429	2	-0.41132	-0.69973	0.32028	0.78909	0.4841	0.81541	-1.7314	-2.9098	0.0070182	0.10793	0.0036162	0.052387
Xirp1	4	0.26172	1.1325	0.24754	0.72781	0.25744	0.70543	0.41627	1.8023	0.0999	0.50349	0.071504	0.42526
Fut7	4	0.017158	0.14331	0.90123	0.98803	0.88605	0.96812	-0.0039008	-0.032594	0.99614	0.99874	0.974	0.99126
Nmi	4	0.23957	1.286	0.28584	0.76171	0.19845	0.66045	0.3132	1.6822	0.21163	0.69153	0.092524	0.47011
Borcs6	4	-0.054059	-0.24424	0.86947	0.98171	0.80704	0.94056	0.18762	0.84876	0.45254	0.86963	0.39602	0.72646
Olfr168	6	0.037505	0.28873	0.78902	0.97276	0.77279	0.92977	0.14131	1.0885	0.48949	0.88574	0.27638	0.65152
Fbrs	4	-0.30823	-1.6693	0.29836	0.76958	0.095049	0.52201	-0.56737	-3.0728	0.083828	0.46017	0.0021209	0.035095
Gm14596	2	0.653	0.80945	0.048607	0.35139	0.41826	0.7915	0.18141	0.22292	0.59906	0.92785	0.8236	0.93536
NO_SITE_120	1	-0.28976	-1.4372	0.54607	0.91176	0.15067	0.61607	0.17744	0.88104	0.71317	0.95916	0.3783	0.71646
Rnf24	4	-0.16958	-0.85431	0.56184	0.91595	0.39293	0.7807	0.12686	0.64008	0.6124	0.93276	0.52212	0.79621
Cd101	4	0.30886	1.1488	0.17428	0.63105	0.25065	0.69964	0.50849	1.8922	0.050817	0.35675	0.058461	0.3812
Lcor	4	0.44996	1.7223	0.054802	0.37649	0.085006	0.49681	0.42486	1.6266	0.093922	0.4884	0.10383	0.49309
Epo	4	-0.13996	-0.77462	0.63241	0.93113	0.43856	0.80002	-0.16682	-0.92389	0.55963	0.91526	0.35554	0.7029
Oard1	4	0.15386	0.7247	0.48603	0.88698	0.46863	0.80992	-0.018715	-0.08818	0.95265	0.9962	0.92973	0.97581
Klhl30	4	0.042353	0.16243	0.82112	0.97489	0.87097	0.96381	-0.032675	-0.12534	0.91431	0.99297	0.90026	0.96371
Astn1	4	0.31617	0.96524	0.1648	0.61394	0.33443	0.75098	0.52195	1.5942	0.046095	0.33983	0.11089	0.50585
Map3k5	4	0.16598	0.75739	0.45362	0.87171	0.44882	0.80336	0.29021	1.3252	0.24698	0.73221	0.18512	0.58691
Dusp19	4	-0.14372	-0.71892	0.6234	0.9298	0.47219	0.81103	0.10576	0.52954	0.67253	0.95152	0.59643	0.83373
4921511H03Rik	4	0.12997	0.72312	0.55357	0.91371	0.46961	0.81013	0.017934	0.09979	0.93801	0.99476	0.92051	0.97203
Alyref	4	-0.95829	-2.4759	0.0083611	0.12215	0.013291	0.15558	-1.2461	-3.2176	0.0013863	0.03653	0.0012925	0.024215
Agap2	4	0.52283	1.1613	0.027639	0.2553	0.24551	0.69793	0.062723	0.13879	0.80089	0.97598	0.88962	0.96034
Serpinb1c	4	0.34229	1.6362	0.13438	0.56585	0.1018	0.53745	0.055948	0.26734	0.82104	0.9808	0.78921	0.92068
Mccc2	4	0.0075269	0.046857	0.93207	0.99029	0.96263	0.99008	0.18161	1.1318	0.46749	0.87867	0.25771	0.6375
Nav1	4	0.22605	1.0312	0.31356	0.78376	0.30243	0.73202	-0.094464	-0.43092	0.73886	0.96442	0.66653	0.86659
Npm3	4	0.026352	0.12484	0.87185	0.9831	0.90065	0.97248	0.099326	0.47096	0.69116	0.95489	0.63767	0.85404
Cdc42se1	4	0.62016	2.1371	0.01135	0.1458	0.032592	0.28376	0.27914	0.96115	0.26574	0.74849	0.33648	0.69131
4933403O08Rik	4	0.33883	1.623	0.13872	0.57425	0.1046	0.54342	0.23044	1.1039	0.35559	0.81761	0.26966	0.64722
Mrpl55	4	-1.34	-3.6795	0.00056319	0.019461	0.00023373	0.0080404	-1.3909	-3.8195	0.00069315	0.024242	0.00013374	0.004423
Hsd17b10	4	-2.5894	-5.4183	0	0	6.0172e-08	2.5287e-05	-2.9673	-6.209	0	0	5.3321e-10	2.4616e-07
LOC108167705	2	-1.5488	-2.8086	0.0094009	0.13096	0.0049755	0.073059	-1.3873	-2.5414	0.017112	0.18615	0.01104	0.12281
Rbp3	4	0.25982	1.53	0.25049	0.72954	0.12602	0.58026	0.1413	0.83216	0.57046	0.91898	0.40532	0.73191
Slc25a47	4	0.010662	0.056795	0.92284	0.98941	0.95471	0.9879	0.30467	1.6239	0.22337	0.70557	0.10439	0.49417
Sptb	4	-0.1267	-1.0003	0.66594	0.93967	0.31716	0.73972	-0.1579	-1.2472	0.57969	0.92283	0.21231	0.60485
Trappc11	4	-1.2049	-4.09	0.0016896	0.042391	4.3132e-05	0.0024522	-0.47985	-1.6439	0.13508	0.57274	0.1002	0.48624
Lrrc75a	4	0.14688	1.2267	0.5057	0.89524	0.21993	0.67787	0.22137	1.8499	0.37664	0.82953	0.064333	0.40273
Erh	4	-1.1848	-3.6549	0.0019062	0.046316	0.00025728	0.0086194	-1.3564	-4.2005	0.00082312	0.027536	2.663e-05	0.0013782
Slc22a12	4	0.1145	0.51532	0.59797	0.9237	0.60633	0.86699	-0.031007	-0.13954	0.91864	0.99297	0.88902	0.96006
Tubgcp6	4	-0.033479	-0.10784	0.93294	0.99039	0.91413	0.97636	-0.099459	-0.32069	0.7256	0.96151	0.74844	0.90438
Olfr1012	4	0.28233	1.511	0.21362	0.68686	0.13079	0.58794	0.047821	0.25595	0.8469	0.9834	0.79799	0.9241
Gm9994	7	-0.11939	-0.84366	0.61023	0.92777	0.39886	0.78374	-0.13253	-0.93728	0.55591	0.91443	0.34861	0.69822
Hnrnpab	4	-0.84258	-3.7915	0.016202	0.18253	0.00014974	0.0058325	-0.46972	-2.1217	0.14231	0.58724	0.033865	0.27284
Cyth1	4	-0.30942	-2.1342	0.29654	0.76814	0.032823	0.28496	-0.18495	-1.2764	0.51804	0.89765	0.2018	0.59872
Olfr606	4	-0.0030693	-0.015547	0.96885	0.99692	0.9876	0.99678	0.27483	1.3938	0.27241	0.75242	0.16339	0.568
Nfatc2ip	4	-0.25105	-0.79191	0.38946	0.83857	0.42841	0.7953	0.20893	0.66108	0.40424	0.84373	0.50856	0.79125
Rps27	6	-1.3653	-3.8711	0	0	0.00010833	0.0045631	-1.6611	-4.6648	0	0	3.0898e-06	0.00025683
Atg4b	4	0.17102	0.5965	0.44115	0.86785	0.55084	0.84436	0.24121	0.84173	0.33401	0.80254	0.39994	0.72842
Pou5f2	4	0.53827	1.3019	0.024087	0.2342	0.19295	0.65815	0.30676	0.74206	0.22086	0.70337	0.45805	0.76352
Gm13285	22	-0.16923	-1.6641	0.20617	0.67705	0.096095	0.52476	-0.036828	-0.36279	0.81584	0.97976	0.71676	0.89057
Tank	4	-0.079106	-0.15385	0.79825	0.97353	0.87773	0.96563	0.71456	1.3972	0.0094009	0.12886	0.16236	0.56687
Nadk2	4	-0.70458	-2.9179	0.035871	0.29763	0.0035236	0.057226	-0.64714	-2.6857	0.055365	0.37372	0.007237	0.089022
Mblac1	4	0.46999	1.6725	0.045055	0.3392	0.094434	0.52076	0.18466	0.65698	0.45982	0.8736	0.51119	0.79196
1190003K10Rik	4	0.007324	0.050878	0.93272	0.99029	0.95942	0.98904	0.0034034	0.023656	0.98237	0.99833	0.98113	0.99313
Acsl3	4	-0.088069	-0.43071	0.77291	0.96951	0.66668	0.89012	-0.29927	-1.4639	0.31785	0.79071	0.14322	0.54796
Slc35e2	4	0.071965	0.36607	0.72876	0.95869	0.71432	0.90938	0.055707	0.2835	0.82164	0.98086	0.77679	0.91509
Il1b	4	0.28645	1.8502	0.20691	0.67831	0.064291	0.42892	0.0095664	0.061789	0.96339	0.99711	0.95073	0.98292
Snapc1	4	-1.039	-3.289	0.0048087	0.082651	0.0010056	0.023318	-1.153	-3.6547	0.0027293	0.058605	0.00025752	0.0072579
Rnasel	4	0.023743	0.11934	0.8803	0.98536	0.90501	0.97349	0.33289	1.6754	0.18585	0.66214	0.093863	0.47282
Tnfsf15	4	0.39429	1.6045	0.086471	0.4672	0.10859	0.55249	0.31051	1.2638	0.21527	0.69584	0.20629	0.60206
Abi3	4	0.17323	0.91258	0.43534	0.86411	0.36146	0.76453	0.25163	1.3266	0.31291	0.78613	0.18464	0.58659
Casc1	4	-0.036968	-0.26829	0.92176	0.9894	0.78847	0.93506	0.11465	0.83329	0.64589	0.94158	0.40468	0.73113
Celf3	4	0.47296	1.4958	0.043842	0.33355	0.13471	0.59281	0.39279	1.2424	0.11896	0.54473	0.2141	0.60485
Nr3c2	4	0.37173	1.2567	0.10501	0.5101	0.20885	0.6691	0.36685	1.2406	0.14599	0.59394	0.21474	0.60485
Akap3	4	-0.05884	-0.33211	0.85526	0.98065	0.73981	0.91927	-0.0295	-0.16659	0.92315	0.99297	0.86769	0.9528
Ilvbl	4	0.23346	0.92264	0.29879	0.77027	0.35619	0.76239	0.42175	1.6676	0.096435	0.4961	0.095404	0.47673
Olfr1428	4	0.15574	0.80526	0.48148	0.88537	0.42067	0.79282	0.06399	0.33092	0.79764	0.97537	0.74071	0.90015
Dact1	4	0.054548	0.29735	0.78417	0.97181	0.7662	0.9279	0.19082	1.0409	0.44487	0.86456	0.2979	0.66619
NO_SITE_578	1	0.047692	0.11479	0.92895	0.98966	0.90861	0.97445	-0.40479	-0.9747	0.44327	0.8639	0.32971	0.688
Olfr593	4	-0.17819	-0.85642	0.54178	0.91108	0.39176	0.7807	0.028017	0.13479	0.90725	0.99297	0.89278	0.96144
Xlr3b	8	0.21335	1.244	0.17961	0.63745	0.2135	0.67287	-0.20275	-1.1795	0.34194	0.80796	0.2382	0.62291
Tulp3	4	0.69326	1.2448	0.0059351	0.095737	0.21321	0.67258	0.51506	0.92474	0.048477	0.34914	0.3551	0.70271
E130012A19Rik	4	-0.044561	-0.17693	0.89919	0.98764	0.85957	0.9612	0.50463	2.0094	0.052549	0.36339	0.044494	0.32553
Necab1	4	-0.050546	-0.24276	0.88026	0.98536	0.80819	0.94139	0.13683	0.65858	0.58255	0.92318	0.51016	0.79162
Ppcs	4	0.015848	0.083307	0.90629	0.98878	0.93361	0.98229	0.14188	0.74643	0.56886	0.91839	0.45541	0.76142
NO_SITE_163	1	-0.55453	-1.7446	0.32314	0.79202	0.081058	0.48713	-0.068365	-0.21528	0.8531	0.98435	0.82955	0.93837
Tspan5	4	0.17033	1.0477	0.44266	0.86806	0.29476	0.72933	0.20237	1.2452	0.41827	0.85066	0.21305	0.60485
Adamts18	4	0.22784	1.3337	0.31023	0.7811	0.18232	0.64715	-0.20299	-1.188	0.47957	0.88164	0.23483	0.62146
Gm6212	1	0.035581	0.12619	0.95339	0.99363	0.89958	0.97234	0.26952	0.95678	0.55309	0.91304	0.33868	0.69256
Ptpn3	4	0.0052209	0.016655	0.93961	0.99159	0.98671	0.99651	0.46226	1.4756	0.071178	0.42499	0.14005	0.54463
Prss21	4	-0.0040631	-0.019119	0.97258	0.99796	0.98475	0.99606	-0.069882	-0.329	0.8067	0.97764	0.74216	0.90131
Rpl38	4	-0.56675	-1.0135	0.078716	0.44931	0.31083	0.73569	-0.083604	-0.15101	0.76948	0.97033	0.87997	0.95826
Pms1	4	-0.053321	-0.33694	0.87198	0.9831	0.73616	0.91728	0.22657	1.4327	0.36473	0.8225	0.15194	0.55759
Poglut1	4	-0.3042	-1.555	0.30494	0.77572	0.11995	0.5701	-0.036708	-0.18793	0.90192	0.99285	0.85093	0.94656
Gm8460	1	-0.032014	-0.037203	0.92332	0.98942	0.97032	0.99227	-0.46071	-0.5395	0.39804	0.83985	0.58954	0.83028
Oma1	4	0.20436	1.022	0.35905	0.81712	0.30679	0.73413	0.24518	1.2266	0.32587	0.79604	0.21996	0.60818
Pxdn	4	0.067854	0.55928	0.74128	0.96048	0.57597	0.85622	-0.002125	-0.017523	0.99727	0.99909	0.98602	0.99481
NO_SITE_944	1	0.29476	1.0604	0.48776	0.88735	0.28895	0.72616	0.27041	0.97308	0.55192	0.91236	0.33051	0.6887
Zkscan16	4	0.14053	0.46849	0.52294	0.90252	0.63944	0.88026	0.32914	1.098	0.19062	0.66778	0.27222	0.64905
Sec16a	4	0.18289	0.6328	0.41143	0.8542	0.52687	0.8342	-0.14736	-0.50933	0.60434	0.92944	0.61052	0.84149
BC024139	4	0.33112	1.4727	0.1476	0.58924	0.14084	0.60227	0.13383	0.59516	0.59147	0.92557	0.55173	0.81134
Gm38481	1	-0.21811	-0.70424	0.63267	0.93113	0.48129	0.81428	-0.57361	-1.8531	0.33141	0.80002	0.063861	0.40127
NO_SITE_82	1	0.37449	0.86015	0.37097	0.82383	0.3897	0.78045	0.023882	0.054857	0.99424	0.99857	0.95625	0.98466
Olfr1221	4	-0.11124	-0.64608	0.7084	0.95437	0.51823	0.83103	-0.026863	-0.15613	0.93103	0.99307	0.87593	0.95662
Gm5111	4	0.4067	0.84426	0.078586	0.44917	0.39852	0.78369	0.60975	1.2669	0.022224	0.21923	0.20519	0.60091
Fam89b	4	-0.035422	-0.26291	0.92739	0.98966	0.79262	0.93622	0.11719	0.87044	0.63891	0.93936	0.38406	0.71975
Fstl4	4	0.10664	0.51348	0.62119	0.9298	0.60761	0.86699	0.36248	1.7469	0.1505	0.60125	0.080653	0.44871
Gm6367	3	-0.67242	-2.1937	0.075987	0.44062	0.02826	0.25938	-0.80505	-2.615	0.046008	0.33973	0.0089218	0.10454
Chpt1	4	0.16511	0.86654	0.45583	0.87265	0.3862	0.77938	0.095775	0.50254	0.70225	0.95705	0.61529	0.84357
NO_SITE_233	1	0.76434	0.80225	0.083395	0.46011	0.42241	0.79323	0.72248	0.75846	0.12018	0.54703	0.44817	0.75634
Tek	4	0.17713	0.89143	0.42629	0.85927	0.3727	0.76908	0.23621	1.1896	0.3435	0.80905	0.23422	0.62066
Jag1	4	0.43003	1.6706	0.06468	0.40406	0.094804	0.52163	0.14313	0.55597	0.56518	0.917	0.57823	0.82447
4930451I11Rik	4	0.14287	0.77314	0.5164	0.89923	0.43944	0.80028	0.092117	0.49869	0.71247	0.95878	0.618	0.8448
Gtf3a	4	-0.4305	-1.5444	0.16103	0.60804	0.12249	0.57527	-0.73071	-2.6201	0.034658	0.28829	0.0087905	0.10347
Invs	4	-0.075012	-0.23926	0.81038	0.97472	0.8109	0.94217	0.32718	1.046	0.193	0.66977	0.29558	0.6643
LOC108168630	18	0.076586	0.75267	0.4233	0.8591	0.45165	0.80336	0.10472	1.0297	0.37816	0.82953	0.30315	0.66787
Gtf2f2	4	-1.0574	-3.464	0.0043755	0.078722	0.0005323	0.014541	-1.6013	-5.2487	0.00025993	0.012821	1.532e-07	2.7413e-05
Usp16	4	-0.94014	-2.874	0.009011	0.12706	0.0040526	0.06291	-1.0609	-3.245	0.0047654	0.083397	0.0011746	0.02258
Srrd	4	-0.88856	-3.2748	0.01239	0.15443	0.0010574	0.024215	-0.99412	-3.6686	0.0071048	0.10861	0.00024391	0.0069681
Slmo1	4	0.05898	0.34633	0.76961	0.96882	0.7291	0.91444	0.1932	1.1357	0.43946	0.86208	0.25607	0.63675
LOC108168452	3	0.026558	0.079749	0.89291	0.98717	0.93644	0.98343	-0.23016	-0.68959	0.49157	0.88624	0.49045	0.78178
Gm9385	4	-1.4702	-3.5306	0.00021661	0.0097847	0.0004146	0.012116	-1.326	-3.2245	0.00095308	0.02969	0.0012619	0.023778
Ift20	4	0.42273	0.74433	0.069098	0.42084	0.45667	0.80579	0.60531	1.0671	0.023221	0.2254	0.28592	0.65802
Olfr549	4	0.060892	0.30158	0.76312	0.96674	0.76297	0.9268	0.059767	0.29616	0.80982	0.9783	0.76711	0.91109
Gtsf1	4	0.11028	0.72266	0.61054	0.92778	0.46989	0.81028	0.070501	0.46221	0.77728	0.97226	0.64393	0.85673
Kcnip4	4	0.04596	0.2736	0.81047	0.97472	0.78439	0.93417	0.30677	1.8269	0.22086	0.70337	0.067717	0.41441
Dynap	4	0.30364	1.342	0.18143	0.64066	0.17961	0.64384	0.2865	1.2666	0.25274	0.73727	0.20529	0.60098
Zc3h4	4	-0.20693	-0.91598	0.47732	0.88264	0.35968	0.76367	-0.49884	-2.2076	0.12269	0.55237	0.02727	0.2355
NO_SITE_680	1	0.092261	0.42544	0.83993	0.9783	0.67051	0.89055	0.078235	0.36085	0.89499	0.99118	0.71821	0.89113
Ifna12	5	-0.13914	-0.91386	0.6072	0.9268	0.36079	0.76398	-0.3449	-2.2643	0.21189	0.69192	0.023553	0.21119
Ffar1	4	0.23507	1.2031	0.29537	0.76733	0.22894	0.68565	-0.0019553	-0.010007	0.99666	0.99878	0.99202	0.99709
Pkdrej	4	0.15005	0.60563	0.49621	0.88963	0.54476	0.84242	0.16396	0.66203	0.51146	0.8948	0.50795	0.79125
Vmn1r65	5	-0.38129	-1.5259	0.16259	0.61084	0.12703	0.58094	-0.14741	-0.59346	0.57826	0.9217	0.55287	0.81193
Klhl28	4	0.53002	1.3092	0.025777	0.24395	0.19047	0.65543	0.32524	0.80344	0.19534	0.67369	0.42172	0.74304
Gabrg2	4	0.31247	1.0233	0.16969	0.62333	0.30618	0.73329	-0.057749	-0.18902	0.84175	0.98287	0.85007	0.94606
Tecr	4	0.19644	0.99043	0.37642	0.8283	0.32196	0.74216	0.082189	0.41447	0.7428	0.96489	0.67853	0.87264
Cyfip2	4	-0.099348	-0.54073	0.74119	0.96048	0.58869	0.86059	-0.13866	-0.7553	0.62466	0.93654	0.45007	0.75747
Gm10269	3	-2.4403	-3.6139	0.00012997	0.0070922	0.00030165	0.0097386	-1.9621	-2.9454	0.00030325	0.014199	0.0032258	0.048056
Mrgprx1	4	0.14506	1.1767	0.51081	0.89727	0.23933	0.691	0.23399	1.8989	0.34788	0.8122	0.057572	0.37711
Id4	4	0.097484	0.25399	0.64823	0.93618	0.7995	0.93719	0.56791	1.4806	0.031105	0.26801	0.13872	0.54257
Plxna2	4	0.12831	0.79811	0.55959	0.91508	0.4248	0.79355	0.1458	0.90723	0.55794	0.91518	0.36428	0.70787
Cdk2	4	0.51609	1.8913	0.029416	0.26607	0.058589	0.40795	0.47074	1.7254	0.067279	0.41482	0.084451	0.45637
Tmem196	4	0.10754	0.52412	0.61851	0.9298	0.60019	0.86458	0.054675	0.26656	0.82528	0.9811	0.78981	0.92095
Arih2	4	1.247	1.3878	0	0	0.1652	0.62723	1.1851	1.319	0.00017329	0.012195	0.18718	0.58995
Tasp1	4	-0.78626	-3.124	0.022527	0.22603	0.001784	0.034346	-1.0332	-4.1056	0.0058051	0.095374	4.0332e-05	0.0018254
Kcng1	4	0.37801	1.2611	0.099034	0.49491	0.20728	0.66761	0.41655	1.3901	0.09977	0.50295	0.16451	0.56958
Col2a1	4	0.030569	0.16199	0.85868	0.98099	0.87132	0.96381	-0.15507	-0.8219	0.58545	0.92419	0.41113	0.73606
Thtpa	4	0.40782	1.513	0.077849	0.4469	0.13029	0.58708	-0.11383	-0.42218	0.68622	0.95489	0.67289	0.86894
Lrfn1	4	0.45797	1.9286	0.05034	0.35931	0.053782	0.38634	0.25572	1.0769	0.30646	0.78368	0.28152	0.65575
Pate1	4	-0.020258	-0.10536	0.97453	0.99809	0.91609	0.97729	0.14873	0.77434	0.55049	0.91176	0.43873	0.7519
Pou4f2	4	0.036607	0.16573	0.83841	0.97792	0.86837	0.96381	-0.10328	-0.46771	0.71481	0.95987	0.63999	0.85497
Lipo3	4	0.0045735	0.034309	0.94169	0.9917	0.97263	0.9931	0.10027	0.75335	0.68852	0.95489	0.45124	0.7586
Gm21451	4	-0.08358	-0.48749	0.78595	0.97183	0.62591	0.87405	-0.32789	-1.9117	0.27947	0.75921	0.055911	0.37177
Gm7774	1	-2.9184	-3.0816	0.022571	0.22603	0.0020588	0.03848	-2.7233	-2.9079	0.029546	0.25951	0.0036381	0.052514
Rrm2b	4	-0.13907	-0.68462	0.63475	0.93171	0.49358	0.81894	-0.1176	-0.57946	0.67665	0.95302	0.56228	0.81662
Abcb4	4	0.16812	0.90894	0.4486	0.86989	0.36338	0.76553	0.38228	2.0691	0.12832	0.56355	0.038541	0.29628
Klrd1	4	-0.038136	-0.30886	0.91812	0.98935	0.75743	0.92512	0.09854	0.79851	0.6938	0.95489	0.42457	0.74488
Rybp-ps	2	-0.18965	-0.68104	0.61275	0.92882	0.49585	0.82066	0.44201	1.5885	0.19586	0.67447	0.11218	0.50746
Rpl41	4	-0.81784	-3.1088	0.018325	0.19457	0.0018782	0.035712	-0.58717	-2.2542	0.075337	0.43792	0.024184	0.21562
Fam234a	4	0.17798	0.69842	0.42391	0.85927	0.48492	0.81552	0.37993	1.4916	0.13096	0.56378	0.13581	0.53986
Erich6	4	-0.041692	-0.22495	0.9082	0.98878	0.82202	0.94626	-0.0020325	-0.01098	0.99688	0.99887	0.99124	0.99695
Zfp612	4	0.23704	1.4962	0.29151	0.76509	0.13461	0.59263	0.056439	0.3563	0.81978	0.98052	0.72162	0.89293
Slc25a33	4	0.38703	1.2896	0.092232	0.48157	0.19718	0.66045	0.0055616	0.018525	0.97544	0.99784	0.98522	0.99448
Gm11453	1	-1.3455	-1.2824	0.11515	0.52896	0.19972	0.66045	-1.2845	-1.2387	0.13096	0.56378	0.21545	0.60485
Cdrt4	4	0.39438	0.89729	0.086427	0.4672	0.36956	0.76747	0.69836	1.5902	0.011004	0.14095	0.11179	0.50739
NO_SITE_805	1	-0.14216	-0.37122	0.73738	0.9596	0.71048	0.90759	0.3019	0.78875	0.50539	0.89006	0.43026	0.74731
NO_SITE_589	1	0.27562	0.6733	0.51843	0.90045	0.50076	0.82281	0.30795	0.75243	0.4963	0.88686	0.45179	0.75878
Pou1f1	4	-0.1476	-0.85426	0.6134	0.92907	0.39296	0.7807	-0.018884	-0.10938	0.9523	0.9962	0.9129	0.96814
Bin1	4	-0.0090762	-0.03016	0.98887	0.99909	0.97594	0.9931	0.27177	0.90398	0.27804	0.75723	0.36601	0.7089
Pole4	4	-1.2209	-4.3111	0.0014296	0.037246	1.6245e-05	0.0012499	-1.1217	-3.9733	0.0031625	0.063755	7.0885e-05	0.0028358
Ctnnal1	4	0.2083	0.82632	0.34917	0.80964	0.40862	0.78822	0.10887	0.43198	0.66313	0.94878	0.66576	0.86657
Fam173b	4	-0.32494	-1.584	0.27561	0.75094	0.11319	0.55939	-0.18489	-0.90313	0.51822	0.89765	0.36646	0.70928
Rars	4	-0.60716	-1.0017	0.06338	0.40033	0.31648	0.73912	0.33774	0.56394	0.17927	0.65176	0.5728	0.82211
Cdh1	4	0.41546	1.2034	0.073387	0.43347	0.22883	0.68559	0.54314	1.5736	0.039423	0.31111	0.11559	0.51192
Gm12537	3	-1.4923	-2.0353	0.0019928	0.047668	0.041819	0.3315	-0.40782	-0.59987	0.25378	0.73772	0.54859	0.80983
Procr	4	0.099114	0.85191	0.64316	0.93467	0.39426	0.78139	0.0024367	0.020949	0.98518	0.99847	0.98329	0.99398
Imp4	4	-1.1255	-3.6617	0.0027726	0.058235	0.00025059	0.0084572	-0.93727	-3.0761	0.0099207	0.13283	0.002097	0.034849
LOC108169144	1	-1.3303	-2.4364	0.11797	0.53267	0.014835	0.16456	-0.93298	-1.7268	0.1998	0.67684	0.084195	0.45572
Olfr469	7	0.10724	0.59022	0.50747	0.89591	0.55504	0.84667	-0.054482	-0.29978	0.82	0.98052	0.76435	0.91029
Fnip2	4	-0.056003	-0.40797	0.86401	0.98099	0.6833	0.89619	-0.018523	-0.13503	0.95313	0.9962	0.89259	0.96144
Defb39	4	0.22737	1.1913	0.31088	0.7811	0.23352	0.68796	0.19577	1.0261	0.43352	0.85779	0.30482	0.6691
LOC108167537	1	0.78118	0.88476	0.078629	0.44917	0.37628	0.77196	0.49701	0.56294	0.27076	0.75111	0.57347	0.82251
Rfx5	4	-0.097809	-0.55045	0.74535	0.96187	0.58201	0.85771	-0.10065	-0.5667	0.72205	0.96141	0.57091	0.82144
Hmgxb3	4	-0.11749	-0.59058	0.69129	0.94599	0.5548	0.84655	0.080017	0.4026	0.74839	0.96606	0.68724	0.87688
LOC108168646	18	0.076586	0.75267	0.4233	0.8591	0.45165	0.80336	0.10472	1.0297	0.37816	0.82953	0.30315	0.66787
Hist1h2al	8	-0.82997	-3.5593	0.00077979	0.024259	0.00037179	0.01138	-0.6577	-2.8385	0.0062384	0.099654	0.0045328	0.062095
Ctnna2	4	0.28641	1.1523	0.20699	0.67835	0.24918	0.69846	0.46318	1.8645	0.070658	0.42386	0.062257	0.39614
Klhl41	4	0.028256	0.18129	0.86544	0.98099	0.85614	0.9598	-0.10008	-0.64235	0.72387	0.96151	0.52065	0.7957
Itsn1	4	-0.0070169	-0.03416	0.9815	0.99882	0.97275	0.9931	0.14744	0.71825	0.55383	0.9138	0.4726	0.77187
Rnd3	4	-0.19812	-1.1157	0.4966	0.88966	0.26453	0.71046	-0.2799	-1.5778	0.34484	0.81026	0.1146	0.50963
Ppp3ca	4	0.60198	1.4965	0.013733	0.16502	0.13453	0.59263	0.64016	1.5918	0.017415	0.18733	0.11143	0.50646
Abca5	4	0.19671	0.84664	0.3759	0.82823	0.3972	0.78268	0.21518	0.92671	0.39128	0.83755	0.35408	0.70196
Chchd6	4	-0.20256	-1.4086	0.48664	0.88714	0.15894	0.62433	-0.1753	-1.22	0.54009	0.90941	0.22248	0.61095
Cenpm	4	-1.2221	-3.9181	0.0013863	0.03624	8.9231e-05	0.0039458	-1.4433	-4.6373	0.00056319	0.021997	3.5307e-06	0.000282
Pim2	4	-0.04105	-0.32869	0.9095	0.98884	0.74239	0.91969	-0.099734	-0.79903	0.72482	0.96151	0.42427	0.74475
Gimap8	4	-0.04235	-0.22411	0.90586	0.98878	0.82267	0.9464	0.14974	0.79311	0.54772	0.91162	0.42771	0.74623
Sfrp1	4	0.13112	0.58163	0.54993	0.91302	0.56081	0.8507	0.43702	1.9396	0.085821	0.46664	0.052431	0.35787
Pah	4	0.24597	0.85669	0.27358	0.7484	0.39161	0.7807	0.33185	1.1564	0.18763	0.6659	0.24752	0.63035
Osmr	4	-0.029199	-0.14547	0.94576	0.99205	0.88434	0.96762	-0.015991	-0.079715	0.96079	0.99711	0.93646	0.97768
Zfp959	5	0.11539	0.56601	0.55279	0.91371	0.57139	0.85466	0.13347	0.65509	0.55573	0.9144	0.51241	0.79276
Alg1	4	-1.7141	-3.8872	8.6644e-05	0.0049383	0.0001014	0.0043345	-1.4312	-3.2793	0.00060651	0.022329	0.0010408	0.020638
Mrpl28	4	-0.86196	-2.7225	0.01434	0.16879	0.0064795	0.088344	-0.99719	-3.149	0.0070182	0.10793	0.0016383	0.02889
Tmem81	4	0.22207	1.207	0.32132	0.7898	0.22742	0.68507	0.14321	0.7786	0.56487	0.91695	0.43622	0.75004
Tmem150c	4	0.037006	0.25626	0.83728	0.97779	0.79775	0.93661	-0.13546	-0.93829	0.63176	0.93719	0.3481	0.69804
Gm32112	1	-3.3513	-4.0664	0.014643	0.17088	4.7741e-05	0.0026052	-5.6164	-6.9179	8.6644e-05	0.0082645	4.5838e-12	1.1757e-08
Lgals9	4	-0.12625	-0.6267	0.66703	0.94001	0.53086	0.83541	0.11199	0.55637	0.65446	0.94514	0.57796	0.82445
Lag3	4	-0.01406	-0.078	0.99406	0.99909	0.93783	0.98364	0.25206	1.4021	0.31218	0.78591	0.16087	0.56569
Gm14137	4	0.26972	1.3715	0.23342	0.71044	0.17023	0.63253	0.0049273	0.025042	0.97713	0.99784	0.98002	0.99267
Gm3508	1	0.042084	0.080922	0.941	0.9917	0.9355	0.98328	0.0015834	0.0030635	0.96664	0.99711	0.99756	0.99885
Fcf1	4	-0.46605	-1.666	0.13594	0.5682	0.095714	0.52346	-1.2454	-4.4401	0.0013863	0.03653	8.9913e-06	0.0005894
LOC108168516	17	0.039285	0.39363	0.63224	0.93113	0.69386	0.89888	0.04401	0.44115	0.69194	0.95489	0.6591	0.86239
Szrd1	4	-0.12038	-0.57654	0.68293	0.94283	0.56425	0.85185	-0.39977	-1.9117	0.19893	0.67684	0.05592	0.37177
Gm5592	4	0.034993	0.1687	0.84452	0.97896	0.86603	0.96322	-0.088967	-0.4289	0.75406	0.96766	0.66799	0.86741
Tas2r110	4	0.10706	0.70191	0.62002	0.9298	0.48273	0.8149	-0.10713	-0.70251	0.70454	0.95732	0.48236	0.77726
Ttc3	4	0.22644	1.5882	0.31287	0.78328	0.11225	0.55743	-0.024948	-0.17497	0.93632	0.99467	0.8611	0.95041
Plxdc2	4	0.5978	1.6381	0.014166	0.16821	0.10139	0.53681	0.45975	1.2598	0.072608	0.42952	0.20773	0.60338
Gm20832	5	-0.0041453	-0.020866	0.95975	0.99452	0.98335	0.99578	0.10719	0.54003	0.63454	0.93786	0.58917	0.83017
Nefm	4	0.17835	0.51767	0.42295	0.8591	0.60469	0.86689	0.19841	0.57584	0.42724	0.85511	0.56473	0.81786
Oaf	4	-0.11873	-0.55363	0.68709	0.94467	0.57983	0.85705	-0.26715	-1.2456	0.36377	0.82203	0.21292	0.60485
Fam101a	4	-0.029879	-0.16911	0.94416	0.99195	0.86571	0.96314	-0.20948	-1.1858	0.46779	0.87886	0.23572	0.62184
Tinagl1	4	0.031442	0.25037	0.85582	0.98065	0.8023	0.93874	-0.095268	-0.75883	0.73656	0.96411	0.44796	0.75619
Kif6	4	0.21036	1.1574	0.34415	0.80527	0.2471	0.69793	0.00059143	0.0032551	0.9896	0.99856	0.9974	0.99885
LOC102635261	1	-1.1133	-2.3765	0.15028	0.59154	0.017478	0.18372	-0.58234	-1.2544	0.32734	0.79604	0.20971	0.60401
Neu2	4	0.12718	0.61073	0.56293	0.91619	0.54138	0.84063	0.3411	1.6392	0.17541	0.64577	0.10117	0.48877
NO_SITE_497	1	0.30605	0.61607	0.47152	0.88057	0.53785	0.83918	0.63763	1.2839	0.1638	0.62751	0.19917	0.59837
NO_SITE_697	1	0.71479	1.0916	0.10168	0.50214	0.27501	0.71806	0.58265	0.89008	0.19898	0.67684	0.37342	0.71343
Cdk5rap1	4	0.20762	0.92604	0.35091	0.81105	0.35443	0.76181	0.10159	0.45315	0.68427	0.95489	0.65044	0.85998
Taf6l	4	0.46921	0.6918	0.045401	0.34059	0.48906	0.8177	1.2895	1.9021	8.6644e-05	0.0082645	0.057159	0.37568
Rad9b	4	0.21891	1.3015	0.32756	0.79439	0.19309	0.65815	0.11884	0.70682	0.63441	0.93786	0.47968	0.77582
Krt77	4	0.034524	0.22734	0.84634	0.97975	0.82016	0.9455	0.11209	0.73837	0.65429	0.94514	0.46029	0.76566
Scfd1	4	-0.71986	-2.4326	0.033141	0.2846	0.014989	0.16586	-0.68918	-2.3365	0.043452	0.32928	0.019466	0.18484
Gm815	4	0.1763	0.96176	0.42772	0.85957	0.33617	0.75184	0.27199	1.4843	0.27774	0.75691	0.13774	0.54225
Pax5	4	0.016826	0.08768	0.90253	0.98856	0.93013	0.98063	-0.0037524	-0.01956	0.99692	0.99887	0.98439	0.99413
Spin2-ps4	2	0.34567	0.74445	0.27206	0.74827	0.45661	0.80574	-0.80727	-1.7334	0.10016	0.50414	0.083029	0.45459
Ptcd1	4	-0.73142	-2.3743	0.031278	0.27515	0.017584	0.18449	-1.341	-4.3095	0.00090976	0.028649	1.6361e-05	0.00094178
Oasl2	4	0.20221	1.634	0.36377	0.82026	0.10227	0.53932	0.090802	0.73384	0.71689	0.96011	0.46305	0.7669
Gm9370	1	-0.92332	-1.8473	0.18858	0.64999	0.064701	0.42892	-1.2044	-2.4309	0.14175	0.58617	0.015059	0.15434
Iapp	4	0.13271	0.78036	0.54603	0.91176	0.43518	0.79892	0.13852	0.81481	0.57748	0.92136	0.41518	0.73874
Cnn2	4	0.12329	0.70746	0.57358	0.91879	0.47928	0.81306	0.20773	1.1926	0.40697	0.84494	0.23304	0.62012
NO_SITE_681	1	0.33742	0.37944	0.42113	0.8591	0.70436	0.90422	0.71425	0.80344	0.12355	0.55368	0.42172	0.74304
Rras	4	0.1542	0.57005	0.48538	0.88681	0.56864	0.85387	0.24335	0.90045	0.32977	0.79855	0.36788	0.71009
Mc3r	4	-0.23171	-1.5756	0.42672	0.85927	0.11512	0.56207	-0.10282	-0.69982	0.71598	0.95987	0.48404	0.77823
Fam109b	4	0.20013	1.0405	0.36806	0.82235	0.29812	0.72997	-0.12078	-0.62795	0.66863	0.95031	0.53003	0.79965
Foxn1	4	0.50072	1.8831	0.034051	0.28972	0.059691	0.41167	0.39459	1.4841	0.11688	0.54068	0.13778	0.54225
Amhr2	4	-0.046713	-0.32271	0.89191	0.98717	0.74692	0.92121	-0.045369	-0.31353	0.8758	0.98919	0.75388	0.90631
2810403A07Rik	4	-0.30894	-1.4644	0.29706	0.76821	0.14308	0.60657	-0.3872	-1.836	0.21106	0.69116	0.066364	0.40926
Olfr1051	6	-0.015466	-0.12102	0.99445	0.99909	0.90367	0.97292	-0.14294	-1.1188	0.55114	0.91178	0.26325	0.64207
Cnot10	4	-1.7748	-4.5129	4.3322e-05	0.0035336	6.3935e-06	0.00064671	-2.126	-5.3669	4.3322e-05	0.004878	8.0096e-08	1.6962e-05
Olfr441	6	0.067521	0.4503	0.67729	0.94135	0.65249	0.88555	-0.14766	-0.98456	0.53814	0.90837	0.32484	0.68292
Lypd4	4	0.09472	0.34203	0.65689	0.93813	0.73233	0.91543	0.53711	1.9485	0.041026	0.31768	0.051355	0.35502
Tnfrsf26	4	0.024103	0.055961	0.87918	0.98486	0.95537	0.98802	0.090626	0.21067	0.71711	0.96011	0.83315	0.93973
Klrg2	4	-0.067925	-0.33142	0.82953	0.97606	0.74033	0.9195	0.21192	1.0349	0.39731	0.83884	0.30069	0.66754
Ncln	4	-0.10999	-0.45214	0.71243	0.95462	0.65116	0.88518	0.021675	0.089224	0.92709	0.99297	0.9289	0.97548
Picalm	4	-0.24847	-1.8082	0.39375	0.84157	0.07057	0.45071	-0.011469	-0.083534	0.97336	0.99778	0.93343	0.97693
NO_SITE_162	1	0.61919	0.91352	0.14638	0.58691	0.36097	0.76421	0.55005	0.81167	0.22415	0.70644	0.41698	0.73991
Mmgt2	4	-0.018532	-0.085863	0.98046	0.99882	0.93158	0.98123	0.03527	0.16362	0.88606	0.99047	0.87003	0.95379
Wdr89	4	-0.49223	-1.9812	0.11775	0.53267	0.047569	0.35989	-0.64685	-2.6024	0.055452	0.37372	0.0092564	0.10742
Krtap1-3	4	0.16206	0.828	0.46484	0.87858	0.40767	0.78822	0.41288	2.1105	0.1028	0.51109	0.034818	0.27791
Ints1	4	-1.0113	-2.7658	0.0056319	0.092068	0.0056778	0.080702	-0.58068	-1.6086	0.078153	0.44598	0.1077	0.4998
Ten1	4	-1.2129	-3.9343	0.0014729	0.037862	8.3429e-05	0.0037956	-0.9334	-3.0392	0.010311	0.13647	0.002372	0.038262
Ganc	4	0.39023	1.2266	0.089243	0.47465	0.21998	0.67787	0.3056	0.96044	0.22194	0.70429	0.33683	0.69161
Rad23a	4	-0.028276	-0.15326	0.94892	0.9928	0.8782	0.96581	-0.20304	-1.0999	0.47953	0.88164	0.27137	0.64885
Clec4n	4	0.3124	1.2939	0.17004	0.6244	0.19569	0.6599	0.33833	1.4019	0.17849	0.65072	0.16095	0.56572
Card19	4	0.0017417	0.0088226	0.95148	0.99304	0.99296	0.99782	0.18149	0.91987	0.46805	0.87887	0.35764	0.70414
Galnt1	4	-0.041383	-0.16925	0.90881	0.98878	0.8656	0.96314	0.23007	0.94198	0.3565	0.81783	0.3462	0.69714
Tspyl4	4	-0.2125	-0.93786	0.46562	0.87918	0.34832	0.7577	0.057817	0.25638	0.8158	0.97976	0.79766	0.92389
Adipor1	4	0.16223	0.72846	0.46437	0.87856	0.46633	0.80852	0.23258	1.0448	0.3513	0.81549	0.29612	0.66443
H60c	4	0.039152	0.14104	0.83061	0.97627	0.88784	0.96857	0.26481	0.95577	0.28956	0.76819	0.33919	0.69261
Mphosph10	4	-0.65524	-2.5919	0.047308	0.34787	0.0095452	0.12145	-0.21381	-0.85427	0.45943	0.87327	0.39295	0.72482
NO_SITE_820	1	-0.041306	-0.12608	0.90755	0.98878	0.89967	0.97234	-0.16189	-0.49437	0.71516	0.95987	0.62105	0.84655
B3gnt9	4	0.25844	1.0402	0.2527	0.73141	0.29827	0.72997	-0.10329	-0.41562	0.71477	0.95987	0.67769	0.87182
Rbfox1	4	0.17883	0.91677	0.42187	0.8591	0.35926	0.76367	0.35838	1.8386	0.15488	0.61111	0.065972	0.40776
Cxxc1	4	-1.508	-4.1545	0.00017329	0.008316	3.2606e-05	0.0020342	-2.0155	-5.4933	4.3322e-05	0.004878	3.9447e-08	9.5847e-06
Rnf182	4	0.20011	0.65488	0.36811	0.82235	0.51254	0.82862	0.26346	0.86261	0.29242	0.77064	0.38835	0.72201
Tmem88b	4	-0.2363	-0.59506	0.41736	0.85798	0.5518	0.84473	0.29929	0.7561	0.23186	0.7156	0.44959	0.75747
Angel1	4	0.20187	1.1294	0.36451	0.82026	0.25875	0.70623	0.11392	0.63751	0.64879	0.94236	0.52379	0.79722
Pan3	4	0.22481	0.66486	0.3156	0.78586	0.50614	0.82537	0.39048	1.1563	0.12113	0.54964	0.24756	0.63035
Fgl1	4	0.3245	1.258	0.15488	0.59823	0.20839	0.66847	0.078033	0.30254	0.75389	0.96766	0.76224	0.90961
Sphkap	4	0.033597	0.13277	0.84876	0.9799	0.89438	0.97062	0.44826	1.7732	0.079322	0.44751	0.076197	0.43666
H2-M10.2	4	-0.099629	-0.81598	0.74037	0.96044	0.41451	0.79102	0.004247	0.034823	0.97951	0.99784	0.97222	0.99056
Xpo5	4	-1.5461	-5.5668	0.00017329	0.008316	2.5952e-08	1.3023e-05	-1.4416	-5.2153	0.00056319	0.021997	1.8357e-07	3.1387e-05
Hps6	4	0.17981	0.87652	0.41949	0.85898	0.38075	0.77606	0.11431	0.55749	0.64727	0.94188	0.57719	0.82423
Gna14	4	-0.2538	-1.8089	0.38487	0.83434	0.070464	0.45056	0.11091	0.79135	0.65767	0.94698	0.42874	0.74692
1700001F09Rik	9	-1.0961	-4.4111	0	0	1.0283e-05	0.00089233	-0.76235	-3.1175	0.0012997	0.035461	0.001824	0.031326
1190007I07Rik	4	-0.25852	-1.7208	0.3766	0.8283	0.08529	0.49754	0.1454	0.96906	0.55898	0.91526	0.33252	0.6892
Gm4654	1	-1.3455	-1.2824	0.11515	0.52896	0.19972	0.66045	-1.2845	-1.2387	0.13096	0.56378	0.21545	0.60485
Rfpl4	4	0.09044	0.33714	0.66924	0.94009	0.73601	0.91721	-0.0019199	-0.0071596	0.99649	0.99874	0.99429	0.99774
Agk	4	-0.37658	-1.5907	0.21262	0.68504	0.11167	0.55671	0.027388	0.11588	0.90894	0.99297	0.90775	0.96591
Odf2l	4	-0.077843	-0.499	0.80137	0.97368	0.61778	0.87109	-0.087335	-0.56031	0.75835	0.96856	0.57527	0.8236
Ndufb5	4	-0.22159	-0.98898	0.44708	0.8691	0.32267	0.74267	-0.061284	-0.27396	0.83217	0.98179	0.78411	0.9182
Olfr789	1	-0.1805	-0.41886	0.6818	0.94268	0.67532	0.89301	0.13033	0.30285	0.7973	0.97537	0.762	0.90959
Rbm19	4	-0.60179	-1.8675	0.065199	0.40643	0.061833	0.42016	-0.77497	-2.4044	0.027206	0.24793	0.0162	0.16063
Ssr4	4	-0.048081	-0.24284	0.8878	0.98655	0.80813	0.94138	0.058701	0.29668	0.81302	0.97913	0.76671	0.91097
Ctsh	4	0.24609	0.9924	0.2734	0.7484	0.321	0.7416	0.25725	1.0378	0.3039	0.78303	0.29934	0.66665
Gm20345	14	-0.28667	-1.6384	0.080579	0.4559	0.10133	0.5366	-0.24102	-1.3821	0.13425	0.57061	0.16693	0.57221
Vps29	4	-0.50922	-1.6825	0.10817	0.51814	0.09247	0.51794	0.11418	0.3789	0.64771	0.94192	0.70476	0.88553
Phf6	4	-0.21343	-0.92056	0.4638	0.8784	0.35728	0.76297	-0.8747	-3.7701	0.014383	0.16625	0.00016317	0.0051951
Fgd1	4	-0.0037992	-0.014192	0.97167	0.99786	0.98868	0.99693	0.58507	2.1899	0.027423	0.24902	0.028532	0.24365
Dhx16	4	-0.7339	-2.6596	0.030672	0.27339	0.0078238	0.1032	-1.074	-3.8948	0.0044188	0.081017	9.8293e-05	0.0036473
Magea2	10	-0.050812	-0.42797	0.84296	0.97887	0.66867	0.89022	0.067977	0.57311	0.65949	0.94765	0.56657	0.81852
Msmp	4	0.10187	0.63921	0.63441	0.93155	0.52269	0.83271	0.0075719	0.04752	0.9695	0.99711	0.9621	0.98663
Kcnh8	4	0.030774	0.18261	0.85816	0.98099	0.85511	0.95964	0.21429	1.2722	0.39267	0.83755	0.20331	0.59983
Galnt11	4	-0.12731	-0.76347	0.66426	0.93926	0.44519	0.8019	0.26655	1.6002	0.28692	0.76611	0.10955	0.50334
Sirt1	4	0.32126	1.3357	0.1586	0.60462	0.18165	0.6462	0.04043	0.16808	0.87016	0.98839	0.86652	0.95248
Poln	4	-0.017812	-0.10961	0.98254	0.99882	0.91272	0.97574	0.30479	1.8775	0.22311	0.70548	0.060449	0.38814
Rab12	4	0.11245	0.32878	0.60356	0.92551	0.74232	0.91969	0.42418	1.2419	0.094572	0.49067	0.21426	0.60485
Usp8	4	-0.55429	-1.8428	0.084868	0.46257	0.065356	0.43133	-0.20075	-0.67116	0.48469	0.88352	0.50212	0.78765
Otof	4	0.27617	0.61006	0.22315	0.69797	0.54182	0.8407	0.81751	1.8077	0.0038123	0.073517	0.070659	0.42391
Gm14322	13	-0.53354	-3.1111	0.0028159	0.058824	0.0018639	0.035557	-0.30809	-1.8091	0.071351	0.42544	0.070436	0.42352
Gm5801	1	-0.15089	-0.43075	0.72456	0.95763	0.66665	0.89012	0.018413	0.05263	0.99463	0.99857	0.95803	0.98493
Wdr1	4	-1.2007	-3.4693	0.0017762	0.043991	0.00052181	0.014339	-1.2176	-3.5258	0.0017329	0.042644	0.00042222	0.010381
Ms4a8a	4	-0.041017	-0.22287	0.90967	0.98884	0.82364	0.94701	-0.14522	-0.78917	0.60898	0.93173	0.43001	0.7473
1700088E04Rik	4	0.027616	0.13554	0.86735	0.98099	0.89219	0.9703	-0.27179	-1.334	0.3565	0.81783	0.18221	0.58429
Mfsd12	4	0.10748	0.4967	0.61864	0.9298	0.6194	0.87172	-0.00076739	-0.0035473	0.99393	0.99857	0.99717	0.99885
Serpinb1a	4	0.11679	0.56994	0.59199	0.92232	0.56872	0.85389	0.17826	0.87046	0.47585	0.88067	0.38405	0.71975
Gm15097	26	-0.23375	-2.1746	0.05138	0.36378	0.029658	0.2669	-0.33125	-3.0825	0.0067582	0.10569	0.0020524	0.034331
Btbd18	4	0.093687	0.57902	0.65997	0.93881	0.56258	0.8516	-0.099303	-0.61389	0.72603	0.96151	0.53929	0.80508
Selk	4	-0.26367	-0.81404	0.36655	0.82146	0.41562	0.79109	-0.13916	-0.43105	0.62323	0.93618	0.66643	0.86657
Bpifb6	4	0.090316	0.30635	0.66945	0.94009	0.75934	0.92581	0.28406	0.96492	0.25664	0.74044	0.33459	0.69035
Rps29	4	-0.97542	-2.2896	0.0072781	0.11002	0.022042	0.21586	-2.7368	-6.3685	0	0	1.9088e-10	1.9157e-07
Gm6133	1	-2.2876	-3.1431	0.039813	0.31483	0.0016719	0.032845	-4.5157	-6.2989	0.0047654	0.083397	2.998e-10	1.9772e-07
Kalrn	4	0.1094	0.63951	0.61275	0.92882	0.52249	0.83257	-0.0042052	-0.024591	0.99536	0.99857	0.98038	0.99269
Nans	4	0.14904	0.66811	0.4989	0.89119	0.50406	0.8238	0.11558	0.5187	0.64337	0.94059	0.60397	0.8378
Chid1	4	-0.038224	-0.18741	0.91777	0.98935	0.85134	0.95827	0.062906	0.30863	0.80042	0.97598	0.7576	0.908
Gm3383	14	-0.81596	-3.7393	0	0	0.00018456	0.0067945	-0.80149	-3.679	0	0	0.00023417	0.0068164
Sco1	4	-0.017098	-0.10147	0.98484	0.99882	0.91918	0.97809	0.16919	1.0047	0.4966	0.88686	0.31503	0.67595
Rela	4	0.1053	0.80027	0.6244	0.93018	0.42355	0.79333	-0.13707	-1.042	0.62804	0.93719	0.29743	0.66582
Ndc1	4	-0.091642	-0.21376	0.76281	0.96674	0.83073	0.95005	-0.5866	-1.3651	0.075553	0.43852	0.17223	0.57851
Rnf32	4	-0.24848	-1.283	0.39367	0.84147	0.19948	0.66045	0.095757	0.49528	0.70225	0.95705	0.6204	0.84628
Hipk2	4	-0.062042	-0.295	0.84569	0.97973	0.76799	0.92835	0.2019	0.96055	0.41936	0.85098	0.33678	0.69161
Moxd1	4	0.22897	0.98332	0.3078	0.77872	0.32545	0.74482	0.34859	1.4978	0.16683	0.63339	0.1342	0.53702
Ccdc34	4	0.32125	1.0003	0.1586	0.60462	0.31715	0.73972	0.34494	1.0746	0.17103	0.63915	0.28255	0.65632
Zdhhc15	4	0.12488	0.55247	0.56938	0.91826	0.58063	0.85712	-0.054948	-0.24318	0.84911	0.98376	0.80787	0.92852
Vmn1r5	4	0.18203	0.91055	0.41372	0.85548	0.36253	0.76515	-0.034478	-0.17235	0.90863	0.99297	0.86316	0.95104
Ybx3	4	0.2471	1.3133	0.27198	0.74827	0.18909	0.65528	-0.10078	-0.53522	0.72166	0.96133	0.5925	0.83157
Rbm33	4	-0.67655	-3.3266	0.041936	0.32472	0.00087899	0.02124	-0.62942	-3.1	0.060564	0.39343	0.0019351	0.032867
Prpsap1	4	0.076874	0.42327	0.7133	0.95468	0.6721	0.89126	-0.22872	-1.2592	0.43079	0.85704	0.20797	0.60338
Phf20l1	4	0.14716	0.87994	0.50479	0.89499	0.37889	0.77445	0.22815	1.3656	0.361	0.81985	0.17208	0.57827
Olfr152	4	-0.14397	-0.73934	0.6228	0.9298	0.4597	0.80682	-0.36809	-1.8906	0.23203	0.71585	0.058679	0.38187
NO_SITE_232	1	0.18253	0.80146	0.67344	0.94048	0.42286	0.79333	0.052235	0.22946	0.94832	0.99545	0.81851	0.9333
Eral1	4	-1.2386	-3.0569	0.0011697	0.032181	0.0022365	0.041037	-2.146	-5.2408	4.3322e-05	0.004878	1.599e-07	2.8176e-05
Als2cl	4	-0.034166	-0.31331	0.93086	0.99023	0.75404	0.92423	0.018498	0.16975	0.93627	0.99467	0.86521	0.95193
Pdk2	4	0.23148	0.44999	0.30256	0.77351	0.65272	0.88565	0.69789	1.3596	0.011047	0.1412	0.17396	0.5808
Gm10096	15	-0.66869	-3.2976	0.00021661	0.0097847	0.00097504	0.02278	-0.31594	-1.5831	0.047438	0.3451	0.1134	0.50842
Fam83d	4	0.43824	1.2137	0.060521	0.39319	0.22485	0.68292	0.54706	1.5159	0.038253	0.30459	0.12955	0.53291
Gtse1	4	-0.062247	-0.21721	0.84517	0.97932	0.82804	0.94891	-0.21928	-0.76409	0.44899	0.86656	0.44482	0.75483
Olfr122	4	0.16912	0.60828	0.44578	0.86873	0.543	0.84141	0.22802	0.82054	0.36143	0.82035	0.41191	0.73665
4932414N04Rik	4	0.072972	0.36834	0.72504	0.95777	0.71262	0.90826	0.15006	0.75781	0.54685	0.91128	0.44856	0.75655
Ndufaf5	4	-0.40406	-1.9672	0.18416	0.64419	0.04916	0.36558	-0.30854	-1.5043	0.30455	0.78303	0.13252	0.53587
Krt6b	6	0.06061	0.42647	0.70264	0.95127	0.66976	0.89022	-0.12331	-0.86769	0.6101	0.93204	0.38556	0.72063
Mtnr1a	4	0.06721	0.51302	0.74323	0.96123	0.60793	0.86699	-0.14411	-1.1003	0.61171	0.93276	0.27121	0.6488
Olfr1257	4	0.23751	0.89786	0.29047	0.76419	0.36926	0.76733	0.45874	1.7354	0.073171	0.43101	0.08267	0.45441
0610040J01Rik	4	-0.056712	-0.19671	0.86215	0.98099	0.84405	0.95559	0.020989	0.072877	0.92921	0.99297	0.9419	0.97994
Slc35a3	4	-0.21419	-1.1395	0.46233	0.8772	0.25451	0.70291	-0.14438	-0.76882	0.61093	0.93243	0.442	0.75378
Fbxo21	4	-0.26658	-1.2606	0.36169	0.81873	0.20747	0.66774	-0.069746	-0.33036	0.80709	0.9777	0.74113	0.90044
Fancd2os	4	0.20643	1.0818	0.35398	0.81372	0.27935	0.72157	0.022988	0.12049	0.92237	0.99297	0.9041	0.96461
F2rl3	4	0.064683	0.30934	0.75181	0.96453	0.75707	0.92504	0.12947	0.61968	0.60352	0.92944	0.53547	0.80308
Olfr248	4	0.20556	1.0894	0.35606	0.81509	0.27597	0.71858	-0.049564	-0.26268	0.8644	0.98736	0.7928	0.92161
Olfr340	4	-0.054428	-0.19111	0.86821	0.9811	0.84844	0.95749	0.34281	1.2094	0.17355	0.64281	0.2265	0.61488
Zfp207	4	-0.88244	-2.8677	0.012693	0.1566	0.0041343	0.063836	-0.519	-1.6967	0.11008	0.52652	0.089753	0.46545
Gm3194	14	-0.81596	-3.7393	0	0	0.00018456	0.0067945	-0.80149	-3.679	0	0	0.00023417	0.0068164
Ky	4	-0.037152	-0.27033	0.92128	0.98935	0.7869	0.93491	-0.33485	-2.4361	0.27063	0.75105	0.014845	0.15429
Arhgef25	4	0.30453	1.4238	0.17992	0.63804	0.15451	0.62001	0.052295	0.24454	0.83269	0.98179	0.80682	0.92808
NO_SITE_185	1	-0.089531	-0.26924	0.82364	0.97503	0.78774	0.93506	-0.11428	-0.34377	0.78161	0.973	0.73102	0.89602
NO_SITE_340	1	0.68954	0.8864	0.11164	0.52517	0.3754	0.77143	0.38399	0.49364	0.3925	0.83755	0.62156	0.84663
Sgsm1	4	0.13761	0.49796	0.53139	0.90716	0.61851	0.87138	-0.095517	-0.34503	0.73578	0.9639	0.73007	0.89592
Atp2b1	4	-1.4239	-4.4866	0.00034658	0.013817	7.2353e-06	0.0006988	-0.66338	-2.1125	0.05034	0.3547	0.034642	0.27694
Knop1	4	0.34928	1.6041	0.12676	0.55031	0.10868	0.55254	0.16028	0.73626	0.52099	0.89927	0.46157	0.76626
Gm34423	1	-0.5902	-0.65747	0.30468	0.7755	0.51088	0.82787	0.11043	0.1243	0.8349	0.98179	0.90108	0.96371
Fancf	4	-0.31122	-1.8117	0.29411	0.76666	0.070032	0.4489	-0.36549	-2.1285	0.2355	0.71979	0.033296	0.26901
NO_SITE_512	1	0.47841	1.4807	0.25014	0.72954	0.13869	0.59835	-0.008384	-0.025949	0.95057	0.99573	0.9793	0.99236
Hoxc9	4	0.20038	1.1988	0.3675	0.82235	0.23059	0.68672	-0.13153	-0.78685	0.64177	0.94015	0.43137	0.74782
Aldob	4	0.1336	0.91076	0.54334	0.91135	0.36242	0.76505	0.065761	0.44838	0.79175	0.97436	0.65388	0.86166
Sc5d	4	0.046167	0.3203	0.80973	0.97472	0.74874	0.92202	-0.0029076	-0.020182	0.99983	0.99996	0.9839	0.99408
1700011H14Rik	4	0.14245	0.6098	0.51748	0.90002	0.54199	0.8407	0.24982	1.0704	0.3166	0.7898	0.28443	0.65679
Ackr1	4	0.032227	0.19433	0.85301	0.98019	0.84592	0.95649	0.094429	0.56969	0.70654	0.95793	0.56889	0.82001
Spsb1	4	0.17876	0.97741	0.42204	0.8591	0.32837	0.74552	0.11162	0.61059	0.65559	0.94569	0.54147	0.80591
Mb21d1	4	-0.013912	-0.059573	0.99445	0.99909	0.9525	0.98761	-0.27958	-1.1979	0.34536	0.81068	0.23097	0.61792
Asb17os	1	0.042289	0.28776	0.94052	0.9917	0.77353	0.93027	-0.060735	-0.41341	0.86752	0.98752	0.67931	0.87311
Pde4d	4	0.13834	0.56493	0.52922	0.90502	0.57212	0.85466	0.18059	0.73785	0.47035	0.87997	0.4606	0.76577
Vat1	4	-0.016573	-0.061367	0.98601	0.99882	0.95107	0.98731	0.15112	0.56008	0.54421	0.91064	0.57543	0.82363
Zbtb3	4	-0.061367	-0.35333	0.84781	0.9799	0.72384	0.91205	0.20352	1.1735	0.4152	0.84837	0.24058	0.6254
Olfr456	4	-0.53844	-3.4073	0.092189	0.48157	0.00065602	0.016901	-0.21109	-1.3402	0.46502	0.87752	0.18019	0.58389
NO_SITE_857	1	0.16659	0.33039	0.7016	0.95075	0.7411	0.91969	-0.19946	-0.39566	0.66361	0.94878	0.69236	0.87932
Olfr1247	4	0.032297	0.15858	0.85284	0.98019	0.874	0.96462	0.16188	0.79542	0.51679	0.89703	0.42637	0.7454
Syce2	4	0.29304	0.75354	0.1962	0.66097	0.45112	0.80336	-0.25763	-0.65946	0.38071	0.83117	0.5096	0.79155
Sat1	4	0.11429	0.65072	0.59845	0.9237	0.51523	0.82993	0.16292	0.92795	0.51371	0.89542	0.35343	0.70103
Lrrc8b	4	-0.010631	-0.10663	0.99398	0.99909	0.91508	0.97692	0.04962	0.49799	0.84136	0.98287	0.61849	0.84512
Nxf3	4	-0.056458	-0.4542	0.86284	0.98099	0.64969	0.88417	0.057072	0.45929	0.81826	0.98045	0.64602	0.85761
LOC108167891	1	-1.3777	-2.0226	0.10878	0.51869	0.043118	0.33727	-0.99463	-1.4743	0.18208	0.65651	0.14041	0.54514
Tfeb	4	0.022668	0.11417	0.88416	0.98647	0.9091	0.97445	-0.5502	-2.7621	0.092016	0.48295	0.0057423	0.074676
Klf8	4	0.096995	0.48983	0.64961	0.93619	0.62425	0.87329	-0.0048086	-0.024292	0.9938	0.99857	0.98062	0.99288
Gm13226	1	-1.5109	-2.0364	0.095048	0.48762	0.04171	0.3315	-2.3564	-3.1934	0.041026	0.31768	0.0014062	0.025847
Ehd2	4	-0.25446	-1.2796	0.38344	0.8336	0.20067	0.66126	-0.040304	-0.20325	0.89087	0.99106	0.83894	0.9417
Neurod4	4	-0.087052	-0.82207	0.77603	0.97021	0.41104	0.78844	0.063716	0.60208	0.79864	0.9759	0.54712	0.80937
Cyp2a5	4	0.26452	1.5529	0.24239	0.72212	0.12044	0.57115	0.18688	1.0975	0.45419	0.87116	0.27243	0.64908
Cetn2	4	0.091135	0.3558	0.66724	0.94001	0.72199	0.91124	0.14622	0.57121	0.55708	0.91486	0.56786	0.81949
NO_SITE_967	1	0.25477	1.3723	0.55118	0.91362	0.16998	0.63253	-0.25859	-1.393	0.58983	0.92543	0.16362	0.5683
Olfr1246	4	0.24176	0.67772	0.28246	0.75902	0.49795	0.82119	0.34393	0.96482	0.17233	0.64161	0.33463	0.69035
Klk10	4	0.22772	0.97203	0.31049	0.7811	0.33103	0.74785	0.068516	0.29242	0.7833	0.97314	0.76997	0.9121
Ppp1r18	4	-0.077843	-0.44726	0.80137	0.97368	0.65469	0.88586	-0.11915	-0.68514	0.6727	0.95159	0.49325	0.78341
Gm29777	3	-0.51762	-1.9418	0.15176	0.5943	0.05216	0.38006	-0.18753	-0.70805	0.5715	0.91924	0.47891	0.77519
Dnah7a	4	0.16001	0.75052	0.47035	0.88057	0.45294	0.80401	0.158	0.74152	0.52623	0.90185	0.45838	0.76384
Tceb3	4	0.51247	1.2836	0.030802	0.27339	0.19927	0.66045	0.3604	0.90274	0.15284	0.60549	0.36666	0.70928
Nptxr	4	0.40832	1.4627	0.07759	0.44608	0.14355	0.60705	0.22104	0.79195	0.37746	0.82953	0.42839	0.74675
Trim44	4	0.12977	0.82934	0.55426	0.91371	0.40691	0.78822	-0.0079896	-0.05104	0.98423	0.99847	0.95929	0.98538
Zfp474	4	0.092082	0.54818	0.66426	0.93926	0.58357	0.85832	0.0165	0.098246	0.94182	0.99489	0.92174	0.97255
D6Ertd527e	4	0.10112	0.52022	0.63705	0.93275	0.60291	0.86597	0.19449	1.001	0.43621	0.85986	0.31681	0.67751
Zfp281	4	0.46246	1.9004	0.048304	0.35113	0.057377	0.40269	0.1671	0.68675	0.50184	0.88829	0.49224	0.78275
Col6a1	4	0.19416	1.1916	0.38275	0.8331	0.23341	0.68796	0.33758	2.0734	0.17931	0.65176	0.038139	0.29454
NO_SITE_776	1	0.22759	0.17078	0.59546	0.92323	0.8644	0.96295	0.96699	0.72591	0.055019	0.37211	0.4679	0.76932
Extl2	4	-0.05043	-0.24928	0.8806	0.98555	0.80314	0.93887	0.027751	0.13732	0.90807	0.99297	0.89078	0.96061
Gm4450	1	-0.27417	-1.2228	0.56046	0.91544	0.2214	0.67987	-0.34936	-1.5592	0.49469	0.88637	0.11896	0.5168
Gm10045	4	-0.56738	-1.2396	0.078239	0.44781	0.21511	0.67528	-0.78245	-1.7012	0.026253	0.24192	0.088905	0.46409
Zfp316	4	0.24529	1.4203	0.27509	0.75059	0.15553	0.62114	-0.0051503	-0.029824	0.99285	0.99857	0.97621	0.99172
Rnf165	4	-0.17553	-1.188	0.54802	0.91243	0.23485	0.68821	-0.14115	-0.9559	0.6192	0.93524	0.33912	0.69261
Ift22	4	0.0078954	0.043306	0.93086	0.99023	0.96546	0.99062	0.099084	0.54371	0.69198	0.95489	0.58664	0.82883
Prr23a2	5	0.20306	0.80331	0.31673	0.78621	0.4218	0.79299	0.26907	1.065	0.23701	0.7202	0.2869	0.65843
Celf5	4	-0.25841	-1.5549	0.37681	0.8283	0.11997	0.5701	-0.11098	-0.66916	0.69458	0.95503	0.50339	0.78875
Gm5483	4	-0.22477	-1.5031	0.44084	0.86785	0.13281	0.59078	-0.35149	-2.3512	0.25062	0.73582	0.018712	0.17937
Actc1	4	-0.062255	-0.43991	0.84517	0.97932	0.66	0.88755	0.071178	0.50323	0.77525	0.97155	0.6148	0.84337
Zbtb32	4	0.13039	1.0891	0.55231	0.91371	0.27612	0.71865	-0.036726	-0.30684	0.90192	0.99285	0.75897	0.90825
Gm3089	3	-0.1785	-0.77473	0.57978	0.9196	0.4385	0.80002	-0.27997	-1.2156	0.41091	0.84672	0.22413	0.61323
Rhox2b	7	0.15118	0.85056	0.36464	0.82026	0.39502	0.78213	0.1879	1.0582	0.3253	0.79604	0.28997	0.6601
Ylpm1	4	-0.39377	-1.8307	0.19452	0.65881	0.067149	0.43736	-0.34028	-1.5857	0.26444	0.74813	0.1128	0.50842
Klhl26	4	0.33733	1.3375	0.14097	0.57952	0.18105	0.64615	0.040773	0.16156	0.86895	0.98803	0.87165	0.95447
LOC108168466	4	0.015929	0.053563	0.9059	0.98878	0.95728	0.98867	-0.94223	-3.1398	0.0096175	0.13028	0.0016906	0.029563
Xpo1	4	-0.78699	-1.8481	0.022484	0.22603	0.064583	0.42892	-1.0036	-2.336	0.0068449	0.10661	0.019491	0.185
Smek1	4	-0.23691	-0.96345	0.41589	0.85714	0.33532	0.75154	-0.39657	-1.6132	0.20149	0.67848	0.10669	0.49863
Arih1	4	-0.32314	-1.032	0.27821	0.75452	0.30208	0.73202	-1.1855	-3.7746	0.0021228	0.049345	0.00016027	0.0051548
Gm17763	2	-1.0448	-2.5224	0.044058	0.33432	0.011655	0.1413	-1.1067	-2.682	0.039986	0.31352	0.0073191	0.089722
Ddx59	4	-1.7673	-5.311	4.3322e-05	0.0035336	1.0902e-07	3.3554e-05	-1.3233	-4.0071	0.0009964	0.030544	6.1476e-05	0.0025754
Hhla1	4	0.16202	0.92501	0.46489	0.87858	0.35496	0.76196	0.22544	1.2876	0.36746	0.82468	0.19789	0.59837
Dsg3	4	0.31937	1.3253	0.16077	0.60804	0.18506	0.64988	0.40208	1.6694	0.11099	0.52912	0.095035	0.47606
Pcdh1	4	0.071233	0.38305	0.7311	0.95909	0.70168	0.90319	-0.018096	-0.097337	0.95412	0.99638	0.92246	0.97271
Galnt16	4	0.046091	0.206	0.80995	0.97472	0.83679	0.95254	0.40184	1.7991	0.11112	0.52941	0.072007	0.42597
Krtap6-1	14	-0.26137	-2.0296	0.11212	0.52698	0.042393	0.33386	-0.45407	-3.5226	0.0094009	0.12886	0.00042726	0.010481
Nme4	4	0.53512	1.3315	0.024823	0.23825	0.18302	0.64807	0.25232	0.62789	0.312	0.78582	0.53007	0.79965
Pfn2	4	-0.1288	-0.66559	0.65971	0.93873	0.50567	0.82515	0.15746	0.81511	0.52796	0.90328	0.41501	0.73856
Arl6ip1	4	-0.31976	-1.8719	0.28337	0.76003	0.061221	0.41773	-0.085875	-0.50391	0.76199	0.96904	0.61432	0.84317
Fbxl4	4	0.13504	1.1732	0.5397	0.91108	0.2407	0.69297	0.018044	0.1568	0.93766	0.99467	0.87541	0.95641
Ccdc146	4	0.46768	1.19	0.046008	0.34313	0.23406	0.68809	0.2752	0.70017	0.27189	0.7518	0.48382	0.77799
Creb3l3	4	-0.39595	-1.7528	0.1927	0.65624	0.079636	0.48279	-0.022062	-0.097906	0.94403	0.99489	0.92201	0.9727
Rnf180	4	0.30988	1.5972	0.17311	0.62899	0.11022	0.55443	-0.079511	-0.40959	0.78049	0.973	0.6821	0.8743
Gpr31b	4	0.064725	0.28931	0.75177	0.96453	0.77234	0.92962	-0.063993	-0.28615	0.82411	0.9811	0.77476	0.914
1700010I14Rik	4	-0.025697	-0.122	0.95681	0.99403	0.9029	0.97265	0.24212	1.1518	0.33206	0.80027	0.24941	0.63174
Gm40864	1	-1.4922	-2.0541	0.097128	0.49005	0.039964	0.32244	-1.6677	-2.3139	0.086427	0.46664	0.020672	0.19243
Gm4910	1	-0.051499	-0.14202	0.88858	0.98655	0.88706	0.96813	0.52371	1.4465	0.24655	0.73215	0.14803	0.55353
Zbtb20	4	0.19639	1.1362	0.3766	0.8283	0.25589	0.70401	0.0092074	0.053281	0.96435	0.99711	0.95751	0.98474
Oog2	4	0.20556	1.0754	0.35611	0.81509	0.28218	0.72305	0.28862	1.5113	0.24927	0.73458	0.13072	0.53435
Olfr1434	6	-0.15074	-0.82147	0.53732	0.90998	0.41138	0.78859	0.087275	0.47681	0.66737	0.94987	0.6335	0.85196
Rnasek	4	-0.61184	-2.18	0.06143	0.39576	0.029259	0.26465	-0.41649	-1.4902	0.18485	0.66165	0.13617	0.54044
Coq10a	4	0.003105	0.010947	0.94741	0.99274	0.99127	0.99761	0.074845	0.26428	0.76385	0.96975	0.79156	0.92104
Olfr1094	4	0.39295	1.5497	0.08751	0.46882	0.12121	0.57248	0.24046	0.94839	0.33527	0.8028	0.34293	0.69498
Tmprss11c	4	0.099171	0.61031	0.64285	0.93467	0.54166	0.84063	-0.011678	-0.071899	0.97253	0.99764	0.94268	0.98016
Gm2837	3	0.059867	0.1379	0.79877	0.97368	0.89032	0.9692	-0.40565	-0.93431	0.25556	0.73922	0.35014	0.69911
NO_SITE_975	1	-0.045424	-0.28711	0.89993	0.98764	0.77403	0.93049	0.17517	1.1078	0.71715	0.96011	0.26795	0.64595
Actn3	4	-0.032508	-0.15426	0.9361	0.99097	0.8774	0.96563	0.33276	1.5804	0.18594	0.66235	0.11402	0.50948
Psmc4	4	-0.24566	-0.65584	0.39899	0.84566	0.51192	0.82844	-0.55803	-1.4806	0.08803	0.47102	0.13872	0.54257
LOC108168588	19	0.10097	1.04	0.2945	0.76666	0.29832	0.72997	0.09251	0.95327	0.41762	0.85024	0.34046	0.69325
Trappc6a	4	-0.1118	-0.45348	0.7068	0.95376	0.6502	0.88458	0.28992	1.1784	0.24758	0.73326	0.23865	0.62318
Olfr1321	4	0.24859	1.0341	0.26907	0.74517	0.30109	0.7319	0.29484	1.2275	0.23883	0.72148	0.21965	0.60818
Necap1	4	0.040981	0.33155	0.8252	0.97574	0.74023	0.91947	-0.37882	-3.0635	0.22073	0.70334	0.0021877	0.035942
Ctse	4	0.26183	1.0188	0.24724	0.72728	0.3083	0.73459	0.18733	0.72912	0.45306	0.86992	0.46593	0.76845
Hmbox1	4	-0.15549	-0.94382	0.59455	0.92288	0.34526	0.75641	0.2063	1.2536	0.40965	0.84672	0.21	0.60432
Vmn1r91	13	-0.75273	-3.7352	0.00012997	0.0070922	0.00018757	0.0068399	-0.25514	-1.2908	0.13148	0.56549	0.19679	0.59762
Prss27	4	0.0087698	0.048582	0.92787	0.98966	0.96125	0.98967	-0.044234	-0.24519	0.87978	0.99029	0.80631	0.92802
Pno1	4	-0.98965	-3.2208	0.0066716	0.10343	0.0012781	0.027938	-0.82195	-2.6954	0.020881	0.20966	0.0070295	0.08705
Gm13290	25	-0.20592	-2.0868	0.098687	0.49457	0.036903	0.30719	-0.13312	-1.3514	0.27748	0.75661	0.17657	0.58247
Haus4	4	-0.78543	-2.3836	0.022657	0.22621	0.017145	0.18322	-1.081	-3.2836	0.0040723	0.076361	0.0010248	0.020394
Rap1a	4	0.19487	0.88754	0.38045	0.83116	0.37479	0.77084	0.35382	1.6122	0.16033	0.62056	0.10691	0.49865
Olfr345	4	0.050227	0.27168	0.79639	0.97322	0.78587	0.93463	-0.020581	-0.11136	0.94801	0.99545	0.91133	0.96759
Hist3h2a	4	-0.28294	-0.7653	0.33665	0.7976	0.44409	0.80173	-0.005977	-0.01627	0.99064	0.99856	0.98702	0.99521
Tenm3	4	0.39014	1.2564	0.089286	0.47478	0.20896	0.6693	0.12824	0.41297	0.60802	0.9316	0.67963	0.87328
LOC108168576	18	0.088345	0.89212	0.36988	0.82284	0.37233	0.76894	0.065445	0.66112	0.56895	0.91839	0.50854	0.79125
Zbtb39	4	0.31742	1.5757	0.16315	0.61191	0.11508	0.56207	-0.097761	-0.48522	0.73028	0.96223	0.62752	0.84911
Stx1b	4	0.045715	0.23279	0.81107	0.97472	0.81592	0.94458	-0.062656	-0.31909	0.8281	0.98152	0.74966	0.90487
Ascl2	4	0.21703	0.93136	0.33076	0.79656	0.35166	0.75999	0.33931	1.4568	0.17719	0.64793	0.14516	0.55028
Apol9b	6	0.15587	1.1362	0.3905	0.83975	0.25588	0.70401	0.086465	0.63046	0.6695	0.95031	0.52839	0.79927
Syt3	4	0.13338	0.87291	0.54408	0.91176	0.38271	0.77747	0.15561	1.0189	0.53355	0.9061	0.30826	0.67134
Krtap4-9	5	-0.27303	-1.3828	0.30477	0.77563	0.16672	0.62955	-0.53187	-2.6925	0.066672	0.41482	0.0070921	0.087732
Tgif2-ps2	2	0.19367	0.38007	0.53373	0.9077	0.70389	0.90402	0.79922	1.5696	0.031755	0.27209	0.11652	0.51333
Gm20875	2	-0.27517	-0.69913	0.48204	0.8854	0.48447	0.81541	-0.67652	-1.7142	0.14998	0.60073	0.086485	0.46004
Gypa	4	-0.19823	-1.6099	0.49634	0.88966	0.10742	0.54887	-0.055628	-0.45208	0.84725	0.98341	0.65121	0.86029
Ago1	4	0.37553	1.2447	0.10137	0.5015	0.21325	0.67258	0.38647	1.2815	0.12446	0.55506	0.20002	0.59837
Mlkl	4	-0.21764	-1.3116	0.45488	0.87217	0.18966	0.65533	-0.025599	-0.15446	0.93476	0.99429	0.87724	0.95737
Snx27	4	-0.02778	-0.18189	0.95001	0.9928	0.85567	0.95964	0.203	1.3307	0.41671	0.84967	0.18328	0.58537
Syt17	4	-0.077616	-0.27198	0.80215	0.97381	0.78564	0.93463	-0.019927	-0.069897	0.94979	0.99573	0.94428	0.98037
Gm10350	1	0.2671	0.25248	0.53247	0.90729	0.80067	0.93788	-0.80221	-0.75848	0.23593	0.7202	0.44816	0.75634
Ywhab	4	-0.040089	-0.15135	0.91314	0.98932	0.8797	0.96631	-0.04201	-0.15859	0.88624	0.99047	0.87399	0.95577
Synm	4	0.076627	0.31273	0.71377	0.95474	0.75449	0.92433	0.21742	0.88814	0.38587	0.83422	0.37446	0.71395
Hc	4	0.42472	1.0094	0.067669	0.41498	0.31276	0.73669	0.48271	1.1478	0.061084	0.39518	0.25107	0.63255
Gm38602	1	0.4961	0.91932	0.23195	0.70852	0.35793	0.76297	-0.062227	-0.11531	0.86575	0.98736	0.9082	0.96617
E2f5	4	0.2362	0.99814	0.29286	0.76588	0.31821	0.74054	0.34272	1.449	0.17368	0.64309	0.14735	0.55322
LOC108168628	17	0.039285	0.39363	0.63224	0.93113	0.69386	0.89888	0.04401	0.44115	0.69194	0.95489	0.6591	0.86239
Plgrkt	4	-0.044631	-0.16314	0.89893	0.98764	0.87041	0.96381	0.38152	1.3972	0.12927	0.56378	0.16236	0.56687
Pym1	4	-0.34518	-1.3708	0.24936	0.72947	0.17043	0.63253	-0.74084	-2.9385	0.032968	0.27906	0.0032977	0.048718
Mdm4	4	-0.64719	-3.1674	0.049604	0.35625	0.0015382	0.0312	-0.49847	-2.4441	0.12299	0.55251	0.014522	0.15182
Adgrf4	4	0.055339	0.35611	0.78127	0.97131	0.72175	0.91114	0.1535	0.98827	0.53853	0.90851	0.32302	0.68206
Tgfbr1	4	0.092174	0.29696	0.664	0.93926	0.7665	0.9279	0.44992	1.4506	0.078543	0.44677	0.14689	0.55298
Olfr419	4	0.031074	0.1558	0.85708	0.98099	0.87619	0.96508	0.056538	0.28357	0.81952	0.98052	0.77674	0.91509
LOC102638183	2	-0.35183	-0.39847	0.38418	0.83385	0.69028	0.89865	-0.29317	-0.33334	0.45991	0.8736	0.73888	0.89928
Lama3	4	0.13277	0.50893	0.54581	0.91176	0.6108	0.86753	0.23948	0.91836	0.3373	0.80505	0.35843	0.70438
Cd69	4	0.28625	1.8106	0.20725	0.67858	0.070196	0.44947	0.21369	1.3521	0.39345	0.83755	0.17636	0.58247
Ggt5	4	0.035554	0.17448	0.84278	0.97887	0.86149	0.96193	0.091228	0.44801	0.7155	0.95987	0.65415	0.86166
Zfp689	4	0.18089	0.69451	0.41645	0.85738	0.48736	0.81704	0.33051	1.2701	0.18906	0.66692	0.20407	0.60018
Spryd4	4	0.014395	0.087724	0.91067	0.98904	0.9301	0.98063	-0.20975	-1.2787	0.46723	0.87862	0.20102	0.59872
Cenpt	4	-0.11767	-0.3994	0.69059	0.94566	0.6896	0.89843	-0.31612	-1.0734	0.29424	0.77173	0.28311	0.65638
Appbp2	4	0.28865	1.2704	0.2034	0.67331	0.20396	0.66421	-0.096416	-0.42438	0.73348	0.96313	0.67129	0.86811
Zfp579	4	0.067948	0.32101	0.74102	0.96048	0.7482	0.9217	-0.0043501	-0.020562	0.99497	0.99857	0.9836	0.99398
Olfr126	7	-0.062973	-0.36294	0.81328	0.97472	0.71665	0.90968	0.039788	0.22952	0.82216	0.9811	0.81847	0.9333
Hnrnpa1l2-ps	1	-2.3686	-3.6353	0.037647	0.3062	0.00027765	0.0091537	-1.0466	-1.629	0.17082	0.63865	0.10331	0.49271
Fancm	4	-0.65359	-2.5171	0.047524	0.3487	0.011831	0.14302	-0.57289	-2.2101	0.081619	0.45452	0.0271	0.23447
Prdx6b	4	0.22905	1.3302	0.3075	0.77855	0.18346	0.64826	0.059299	0.34441	0.81116	0.97867	0.73054	0.89599
Vegfc	4	-0.051903	-0.31237	0.87649	0.98443	0.75476	0.92433	-0.031407	-0.18917	0.91743	0.99297	0.84996	0.94598
Ppp1r16a	4	0.25603	1.4741	0.25651	0.73553	0.14047	0.60192	0.29406	1.6935	0.24018	0.72357	0.090359	0.46637
0610010B08Rik	21	-0.5987	-4.7181	4.3322e-05	0.0035336	2.3805e-06	0.00031222	-0.52673	-4.1634	0.0003899	0.017682	3.1348e-05	0.0015429
Fgf1	4	0.031853	0.13564	0.85435	0.98056	0.89211	0.9703	0.30759	1.3113	0.2193	0.70062	0.18975	0.59164
Gm5414	4	0.36028	1.3433	0.11619	0.53095	0.17916	0.6434	0.39817	1.4851	0.11385	0.53534	0.13752	0.54215
Olfr860	4	-0.045628	-0.29146	0.89533	0.98764	0.7707	0.92903	0.072782	0.46535	0.76992	0.97033	0.64168	0.85565
Zfp111	4	-0.082639	-0.49916	0.78872	0.97265	0.61767	0.87109	0.081631	0.49375	0.7441	0.96532	0.62148	0.84662
Gpx4	4	-1.1139	-2.6322	0.0030325	0.061404	0.0084845	0.1104	-1.2197	-2.8539	0.0017329	0.042644	0.0043191	0.060018
Zfp507	4	0.3321	1.1691	0.14634	0.58691	0.24236	0.69477	0.24226	0.85298	0.33189	0.80002	0.39367	0.72534
Blk	4	-0.26387	-1.5212	0.36598	0.82123	0.12822	0.58317	-0.053702	-0.31029	0.85258	0.9841	0.75634	0.90727
Taf8	4	-0.83576	-2.8046	0.016852	0.18541	0.0050378	0.073795	-1.1229	-3.7595	0.0031625	0.063755	0.00017023	0.005368
Olfr1284	4	-0.018987	-0.11566	0.97851	0.99841	0.90792	0.97421	0.22521	1.3729	0.36811	0.82468	0.16978	0.57574
Nat8f3	8	-0.048514	-0.33607	0.86769	0.98104	0.73682	0.91759	-0.011868	-0.082295	0.98128	0.99806	0.93441	0.97711
Slc24a3	4	-0.029407	-0.13199	0.94528	0.99195	0.89499	0.97089	-0.023034	-0.10344	0.94156	0.99487	0.91762	0.9706
BC024063	3	-0.047972	-0.15083	0.89429	0.98747	0.88011	0.96639	0.10722	0.33745	0.70693	0.95793	0.73578	0.89796
Abcc9	4	0.32685	1.2175	0.15275	0.5948	0.22343	0.6814	0.39766	1.4819	0.11446	0.53699	0.13836	0.54242
Crebl2	4	-0.013904	-0.13188	0.99445	0.99909	0.89508	0.97089	-0.001864	-0.017691	0.99632	0.99874	0.98589	0.99477
Mettl20	4	-0.12859	-0.98776	0.66044	0.9389	0.32327	0.74305	-0.072463	-0.55705	0.79821	0.9758	0.5775	0.82431
Zfp418	4	0.26541	1.6018	0.24113	0.72065	0.10921	0.55365	0.073474	0.4435	0.76784	0.97017	0.6574	0.86239
Ttc21a	4	0.065668	0.33904	0.74904	0.96323	0.73458	0.91678	0.20695	1.0692	0.4084	0.84585	0.285	0.65734
Vmn2r5	4	0.32243	0.98148	0.15769	0.60315	0.32636	0.74538	0.43279	1.318	0.08855	0.4726	0.1875	0.59062
Gm16434	12	-0.49416	-2.2151	0.007538	0.11284	0.026752	0.25031	-0.47657	-2.1409	0.011134	0.14199	0.032279	0.26356
NO_SITE_57	1	0.35412	0.92741	0.39822	0.84552	0.35371	0.76107	0.028461	0.074543	0.98696	0.99847	0.94058	0.97958
Nhlh2	4	-0.023645	-0.10935	0.96365	0.99593	0.91292	0.97588	0.14596	0.67541	0.5576	0.91518	0.49942	0.7868
Macc1	4	-0.25224	-1.0718	0.38769	0.83722	0.28381	0.7241	0.17651	0.75074	0.48009	0.88164	0.45281	0.75961
Nmnat3	4	0.096565	0.63498	0.65109	0.93697	0.52544	0.83328	0.13923	0.91619	0.57579	0.92069	0.35956	0.7049
Eif2d	4	0.22381	1.7033	0.31764	0.78712	0.088518	0.50595	0.037648	0.28654	0.87818	0.98984	0.77447	0.914
1190005I06Rik	4	-0.023985	-0.092831	0.96257	0.99556	0.92604	0.9796	0.38425	1.4886	0.12641	0.55965	0.13659	0.5409
Hapln2	4	-0.078341	-0.46867	0.8002	0.97368	0.63931	0.88013	-0.062886	-0.37641	0.82723	0.98152	0.70661	0.88622
Akap1	4	-0.086401	-0.5551	0.77793	0.9704	0.57882	0.85705	0.17199	1.1063	0.49032	0.88574	0.26858	0.64608
Kif26b	4	0.4348	1.8919	0.06195	0.39679	0.058502	0.40764	0.33756	1.469	0.17935	0.65176	0.14184	0.54614
Cnot7	4	-0.14741	-0.50901	0.61413	0.92907	0.61075	0.86753	0.20576	0.71387	0.41052	0.84672	0.47531	0.77333
Camp	4	0.39451	1.6232	0.086341	0.4672	0.10455	0.54332	0.20339	0.83672	0.41572	0.84868	0.40275	0.72981
Gm2457	3	-0.47725	-2.2977	0.17927	0.63677	0.021579	0.21281	0.01471	0.071224	0.95144	0.99592	0.94322	0.98016
Gm2030	16	-0.52468	-3.2597	0.0012563	0.0338	0.0011152	0.025163	-0.40622	-2.539	0.010354	0.13681	0.011118	0.12346
Zbtb7a	4	-0.10495	-0.76919	0.72525	0.95789	0.44178	0.80113	-0.10758	-0.78909	0.7035	0.95726	0.43006	0.7473
Olfr366	4	0.31704	1.6121	0.16363	0.61191	0.10694	0.54803	0.21883	1.1129	0.38284	0.83258	0.26576	0.64351
Ces2c	4	0.10115	0.43771	0.63705	0.93275	0.66159	0.88789	0.092186	0.39909	0.7123	0.95866	0.68982	0.87832
Xrcc4	4	-0.67587	-2.8856	0.042152	0.32553	0.003907	0.061259	-0.71993	-3.0776	0.036997	0.3006	0.0020866	0.034726
Mtmr6	4	0.15944	0.92157	0.47165	0.88057	0.35675	0.76293	0.41937	2.4271	0.097908	0.49857	0.015219	0.15537
Gm7073	4	0.19432	0.97801	0.38214	0.83248	0.32807	0.74552	0.22096	1.1129	0.37768	0.82953	0.26574	0.64351
Plekha2	4	0.2377	1.1545	0.28991	0.76383	0.24829	0.69825	0.15994	0.77707	0.52181	0.89975	0.43711	0.75078
Olfr1032	4	0.37369	1.5738	0.10302	0.50456	0.11554	0.56237	0.18246	0.76832	0.46558	0.87752	0.4423	0.75378
Cnnm1	4	-0.13859	-0.86854	0.63575	0.9321	0.3851	0.77845	0.019802	0.12421	0.93259	0.99349	0.90115	0.96371
Vmn2r49	12	-0.1452	-0.59638	0.42035	0.8591	0.55092	0.84436	0.11935	0.49418	0.41312	0.84708	0.62118	0.84659
Nedd8	4	-1.906	-4.6255	0	0	3.7367e-06	0.00043784	-1.6763	-4.1098	0.00021661	0.012195	3.9594e-05	0.0018024
Arfgap2	4	-0.13888	-0.65578	0.63523	0.93199	0.51197	0.82844	-0.15995	-0.75571	0.57428	0.9196	0.44983	0.75747
NO_SITE_796	1	-0.3942	-1.7279	0.43326	0.86291	0.084012	0.49383	0.22915	1.0055	0.62111	0.93605	0.31464	0.67561
Sstr2	4	0.012522	0.067804	0.91652	0.98935	0.94594	0.98601	0.1322	0.71614	0.59594	0.92677	0.47391	0.77262
Cyp2c38	4	0.012642	0.056984	0.91617	0.98935	0.95456	0.9879	0.12322	0.55603	0.62271	0.93618	0.57819	0.82447
Fbxo45	4	-0.10019	-0.56054	0.73868	0.95997	0.57511	0.85586	-0.11243	-0.62948	0.68999	0.95489	0.52904	0.79937
Gm382	4	0.11513	0.75271	0.59624	0.92334	0.45162	0.80336	0.11509	0.75275	0.64441	0.94098	0.4516	0.7586
Asnsd1	4	0.20415	0.87179	0.3594	0.81734	0.38332	0.7778	0.16086	0.6873	0.51917	0.89826	0.4919	0.78247
Gimap1	4	0.4388	1.6472	0.060217	0.39299	0.099514	0.53256	0.42875	1.6101	0.091149	0.48015	0.10737	0.49895
NO_SITE_924	1	0.39847	0.95028	0.33644	0.79752	0.34197	0.75435	0.026267	0.062643	0.99038	0.99856	0.95005	0.9827
Gm5580	1	0.26347	0.53937	0.53801	0.91028	0.58963	0.86076	0.1558	0.31904	0.75216	0.96735	0.74969	0.90487
Vmn2r19	4	0.085562	0.35405	0.68366	0.94311	0.7233	0.91181	0.16892	0.69959	0.49742	0.88712	0.48419	0.77826
Gimap6	4	-0.032947	-0.19167	0.93471	0.99097	0.848	0.95732	-0.016779	-0.097701	0.95828	0.99711	0.92217	0.97271
Mup21	5	-0.071642	-0.23919	0.81506	0.97472	0.81096	0.94217	0.12836	0.43011	0.57081	0.91904	0.66712	0.86692
Rnf138	4	-0.38058	-2.54	0.20773	0.67927	0.011084	0.13675	-0.061324	-0.4108	0.83204	0.98179	0.68122	0.87395
Ddx50	4	0.16013	0.63984	0.47	0.88057	0.52227	0.83257	-0.051369	-0.20527	0.85955	0.98633	0.83736	0.94117
4932438H23Rik	4	0.25971	0.89019	0.25062	0.72954	0.37336	0.7697	0.36246	1.243	0.15054	0.60128	0.21386	0.60485
LOC102640327	1	-1.1971	-2.2308	0.1359	0.5682	0.025691	0.24275	-1.0564	-1.9825	0.1677	0.6348	0.04742	0.33718
Krtap9-3	4	0.19208	0.85545	0.38803	0.83752	0.3923	0.7807	0.020561	0.09157	0.93034	0.99307	0.92704	0.97493
Ccdc149	4	-0.082216	-0.5451	0.78989	0.97284	0.58568	0.8593	0.033344	0.22126	0.89204	0.99106	0.82489	0.93632
Mfsd4b2	4	0.28042	0.94417	0.21648	0.69115	0.34508	0.75637	0.26871	0.90504	0.28346	0.76348	0.36544	0.70863
Hoxc13	4	-0.042712	-0.21935	0.90474	0.98878	0.82638	0.94803	-0.14774	-0.75894	0.60343	0.92944	0.44789	0.75619
Lcmt2	4	0.36025	1.7372	0.11619	0.53095	0.082351	0.48938	0.31701	1.5293	0.20673	0.68377	0.12618	0.52765
Zfp423	4	0.070414	0.30425	0.73357	0.95954	0.76094	0.92651	0.042176	0.1823	0.86397	0.98736	0.85535	0.94791
Cry2	4	0.26129	0.72272	0.24815	0.72838	0.46985	0.81028	0.37782	1.0455	0.133	0.56757	0.29578	0.66436
Wdr59	4	-0.28598	-1.3025	0.33202	0.79659	0.19276	0.65815	-0.43942	-2.0018	0.16553	0.63105	0.04531	0.32888
Ugt2b35	4	0.021947	0.1247	0.88658	0.98655	0.90076	0.97248	-0.1574	-0.89463	0.58077	0.9229	0.37098	0.71279
Osr2	4	0.45891	1.0919	0.049777	0.35683	0.27486	0.71806	0.44534	1.0601	0.081055	0.45248	0.2891	0.65994
Cand1	4	0.19219	0.78037	0.38777	0.83732	0.43518	0.79892	-0.46656	-1.8935	0.14491	0.59299	0.058291	0.38046
Jchain	4	-0.020477	-0.14353	0.9737	0.99809	0.88587	0.96812	-0.070669	-0.49567	0.80367	0.97688	0.62013	0.84609
Lox	4	-0.13941	-1.1052	0.63358	0.93118	0.26906	0.71395	-0.16533	-1.3113	0.56254	0.91592	0.18975	0.59164
Dynll2	4	0.37703	1.8984	0.10012	0.49785	0.057648	0.40385	0.20312	1.0226	0.41637	0.84933	0.30648	0.66981
LOC102632113	10	-0.64362	-2.2826	0.0023827	0.053089	0.022452	0.21886	-0.83196	-2.9176	0.00025993	0.012821	0.0035273	0.05124
Cyp2a12	4	0.25227	1.1022	0.26314	0.74033	0.27039	0.71438	0.41272	1.804	0.10302	0.51161	0.071224	0.42503
Ulk2	4	0.25514	1.3294	0.25842	0.73718	0.18371	0.64841	0.25949	1.3527	0.29966	0.77842	0.17614	0.58247
NO_SITE_511	1	-0.11335	-0.32819	0.78088	0.97131	0.74277	0.91972	0.49445	1.4332	0.27327	0.75346	0.15181	0.55738
NO_SITE_178	1	0.52552	0.64551	0.20738	0.67872	0.5186	0.83103	0.58374	0.71717	0.19811	0.67684	0.47327	0.77236
Trpc1	4	0.21981	0.73433	0.32604	0.79421	0.46275	0.80852	0.51561	1.7233	0.048304	0.34855	0.084829	0.45739
Armc8	4	-0.32511	-1.7788	0.27527	0.75059	0.075275	0.46693	0.023153	0.12688	0.92176	0.99297	0.89903	0.96317
Speer4d	7	-0.26478	-1.2498	0.24499	0.72528	0.21138	0.67052	-0.22394	-1.0597	0.32374	0.79483	0.28929	0.66005
Rhox3g	7	-0.094343	-0.28827	0.69688	0.94891	0.77314	0.92998	0.13527	0.41504	0.47931	0.88164	0.67811	0.87227
Wfdc15a	4	0.098884	0.55932	0.64394	0.93514	0.57594	0.85622	0.23396	1.3243	0.34792	0.8122	0.1854	0.58737
Slc25a34	4	0.14231	0.73833	0.51813	0.90045	0.46032	0.80723	0.080539	0.41796	0.7467	0.96553	0.67598	0.87122
Olfr1126	4	0.056629	0.40193	0.77707	0.9704	0.68774	0.89796	-0.14893	-1.0572	0.60083	0.9285	0.2904	0.66029
Tipin	4	-0.89255	-2.5136	0.012043	0.15117	0.011951	0.14422	-0.39139	-1.1199	0.2066	0.68367	0.26278	0.64152
Vmn1r94	15	-0.19053	-1.0487	0.23112	0.70835	0.29434	0.72933	-0.30602	-1.6823	0.054239	0.36856	0.092516	0.47011
Rbak	4	0.20466	0.88267	0.35827	0.81632	0.37741	0.77294	0.35921	1.5503	0.15397	0.60867	0.12107	0.52025
Luzp1	4	0.14937	0.57255	0.4982	0.89109	0.56695	0.85324	0.32543	1.2479	0.19512	0.67355	0.21208	0.60485
Nufip2	4	-0.12683	-1.5428	0.66551	0.93941	0.12289	0.57609	0.12621	1.5366	0.61392	0.93298	0.1244	0.52466
Krtap1-5	5	0.13369	0.76968	0.49916	0.89126	0.44149	0.80098	0.0066795	0.038467	0.95806	0.99711	0.96932	0.98921
Mtfr2	4	0.17993	0.62465	0.41901	0.85883	0.5322	0.83585	0.10892	0.37825	0.663	0.94878	0.70524	0.8857
Gm44501	4	0.0033627	0.018606	0.94602	0.99223	0.98516	0.9962	0.13176	0.72934	0.59724	0.92755	0.46579	0.76843
Cpsf2	4	-1.3755	-3.9604	0.00051986	0.018462	7.4819e-05	0.0036131	-0.97342	-2.8447	0.0079712	0.11594	0.0044455	0.061263
Gm13573	1	-3.5159	-4.6335	0.013516	0.16327	3.5955e-06	0.00042781	-3.4726	-4.6415	0.016766	0.18402	3.4585e-06	0.00027817
Creld2	4	-0.28357	-1.3373	0.33592	0.79752	0.18112	0.64615	-0.47889	-2.2603	0.13577	0.57407	0.0238	0.21302
Zfp322a	4	-0.056636	-0.31246	0.86237	0.98099	0.75469	0.92433	0.12028	0.66559	0.63012	0.93719	0.50567	0.78975
Rit2	4	-0.09889	-0.50394	0.74236	0.96109	0.61431	0.86951	0.21459	1.0955	0.39224	0.83755	0.27331	0.6494
Rnase4	4	-0.12847	-1.3931	0.66096	0.93895	0.16358	0.62614	0.018498	0.20069	0.93627	0.99467	0.84094	0.94221
Aldh4a1	4	0.068953	0.36382	0.73777	0.9596	0.71599	0.90938	0.099155	0.52366	0.69176	0.95489	0.60052	0.8358
INACTIVE_4T_10	1	0.081041	0.27487	0.86406	0.98099	0.78342	0.93376	-0.52893	-1.794	0.35641	0.81783	0.072817	0.42779
Bscl2	4	-0.11824	-0.5528	0.6886	0.94512	0.5804	0.85705	-0.23924	-1.119	0.41182	0.84672	0.26314	0.64194
Gm6169	1	-0.15135	-0.31423	0.72365	0.95761	0.75335	0.92379	0.30587	0.63553	0.49907	0.88774	0.52508	0.79765
Gm19366	3	-0.72773	-1.426	0.060824	0.39405	0.15387	0.61996	-1.2883	-2.5289	0.0042889	0.079073	0.011444	0.12603
NO_SITE_413	1	-0.3044	-0.65109	0.52783	0.90366	0.51499	0.82993	0.51435	1.1017	0.25469	0.73842	0.27057	0.64802
2310057M21Rik	4	-0.3979	-1.9338	0.19066	0.65307	0.053144	0.38335	-0.49829	-2.4244	0.12316	0.55258	0.015333	0.15578
Rgl2	4	-0.26633	-1.2915	0.362	0.81873	0.19653	0.66045	-0.50273	-2.4345	0.12039	0.54715	0.014914	0.15434
Vars	4	-0.28042	-0.79202	0.34021	0.80141	0.42835	0.7953	-0.62054	-1.7526	0.06325	0.40354	0.07967	0.44615
Heatr5a	4	0.055947	0.26147	0.77923	0.97096	0.79373	0.9366	0.062912	0.29413	0.80042	0.97598	0.76866	0.91172
Cym	4	0.2021	1.0642	0.36416	0.82026	0.28725	0.72561	0.19711	1.0382	0.43071	0.85704	0.29915	0.66665
Mdh1	4	0.039023	0.12489	0.83117	0.97634	0.90061	0.97248	0.14559	0.46674	0.55846	0.91518	0.64069	0.85521
Fbxo28	4	-0.19924	-1.1619	0.49344	0.88911	0.24528	0.69793	-0.29075	-1.6965	0.32985	0.79855	0.089792	0.46545
Ldlrad4	4	0.12237	0.53045	0.57605	0.91879	0.5958	0.86401	0.36874	1.5994	0.14413	0.59136	0.10973	0.50334
Spata33	4	-0.12638	-0.84075	0.66672	0.94001	0.40049	0.78402	0.050129	0.33385	0.83954	0.98266	0.73849	0.89901
Arhgdib	4	0.19002	1.182	0.39302	0.84103	0.23721	0.68901	-0.080684	-0.50195	0.77741	0.97226	0.6157	0.84359
C1s1	4	0.35034	0.94786	0.12559	0.54833	0.3432	0.75577	0.60114	1.6272	0.023784	0.2279	0.1037	0.49309
Pld5	4	0.079828	0.55648	0.70316	0.95152	0.57789	0.85682	0.093744	0.65381	0.70818	0.95793	0.51323	0.79318
Susd5	4	0.22916	0.74111	0.30715	0.77809	0.45862	0.80663	0.47509	1.5374	0.06494	0.40979	0.1242	0.52466
Apobr	4	-0.013909	-0.11138	0.99445	0.99909	0.91131	0.97525	-0.19015	-1.5226	0.5076	0.89211	0.12787	0.53018
Arl6ip4	4	0.21881	0.70571	0.32764	0.79439	0.48037	0.81387	0.21454	0.69231	0.39232	0.83755	0.48874	0.78136
Ppp2r2c	4	0.32946	1.5105	0.14976	0.59154	0.13092	0.58815	-0.046022	-0.21098	0.87428	0.98919	0.83291	0.93955
Eif5a2	4	0.065747	0.34938	0.74869	0.96311	0.72681	0.91348	0.20496	1.0903	0.41203	0.84672	0.2756	0.65128
Dkk3	4	-0.013133	-0.056822	0.99753	0.9997	0.95469	0.9879	-0.073882	-0.31987	0.79457	0.97496	0.74907	0.9047
Icmt	4	-0.29404	-1.1036	0.31989	0.78877	0.26977	0.71432	-0.3714	-1.3956	0.22848	0.71159	0.16282	0.56713
Gm38490	1	-1.3459	-1.5199	0.11463	0.52896	0.12853	0.58321	-3.0577	-3.4519	0.023221	0.2254	0.00055675	0.012826
Rpl10-ps1	1	0.28958	0.4596	0.4953	0.88942	0.6458	0.88267	-3.9245	-6.2505	0.010441	0.13717	4.0902e-10	2.0088e-07
Cldn17	4	0.27401	1.4003	0.22657	0.70248	0.16142	0.62562	-0.023506	-0.12009	0.94043	0.99487	0.90441	0.9647
Gm13268	3	-0.1807	-0.32584	0.57566	0.91879	0.74455	0.92022	-0.91185	-1.5844	0.028506	0.25376	0.11311	0.50842
Exosc3	4	-0.53682	-1.536	0.093142	0.48293	0.12455	0.57765	-0.52308	-1.5019	0.10774	0.52215	0.13314	0.53587
Gdf5	4	0.20765	0.96978	0.35078	0.81084	0.33215	0.74837	0.15861	0.74094	0.52467	0.90068	0.45873	0.7641
Dnal4	4	0.23258	1.2536	0.3007	0.77191	0.20999	0.66951	0.25837	1.3935	0.30178	0.78077	0.16346	0.56806
Gm5108	4	-0.11726	-0.88259	0.69189	0.94637	0.37746	0.77297	-0.11805	-0.88899	0.67548	0.95265	0.37401	0.71379
Zfyve19	4	0.36263	1.3645	0.11372	0.52896	0.17242	0.63465	0.43186	1.6254	0.089373	0.47513	0.10409	0.49335
Atr	4	-0.58824	-1.8281	0.070008	0.4228	0.06753	0.43859	-1.0135	-3.1461	0.0062817	0.10014	0.0016544	0.029129
Gpr12	4	-0.046127	-0.25158	0.89395	0.98742	0.80137	0.93823	0.15163	0.82811	0.54317	0.91064	0.40761	0.7338
Chit1	4	0.2893	1.0641	0.20227	0.67141	0.28729	0.72561	0.0097346	0.035806	0.963	0.99711	0.97144	0.99045
Sepn1	4	-0.37717	-2.394	0.21197	0.68442	0.016668	0.17903	-0.024389	-0.15512	0.93753	0.99467	0.87673	0.95716
Rpl19-ps6	1	-2.8904	-2.7486	0.022961	0.22825	0.0059859	0.083236	-1.3988	-1.351	0.11545	0.53943	0.1767	0.58252
Krt23	4	0.16467	0.67221	0.45709	0.87314	0.50145	0.82293	0.099237	0.40522	0.69146	0.95489	0.68532	0.87622
Trim52	4	0.33133	0.77911	0.14738	0.58899	0.43591	0.79892	0.64528	1.5183	0.016896	0.1851	0.12894	0.53232
Esco2	4	-0.90429	-3.1414	0.01122	0.14437	0.0016816	0.032979	-1.0272	-3.5762	0.0058918	0.095977	0.0003486	0.0091129
Pick1	4	0.20142	0.91445	0.36512	0.82032	0.36048	0.76398	0.077114	0.35025	0.7567	0.96824	0.72615	0.89392
Cox14	4	-0.019674	-0.11839	0.97687	0.99836	0.90576	0.97386	-0.17246	-1.0381	0.54564	0.91064	0.2992	0.66665
Gm4553	1	-0.092846	-0.13315	0.81593	0.97489	0.89408	0.97062	-0.44645	-0.64132	0.41022	0.84672	0.52132	0.79575
Rpp25	4	-0.14033	-0.77159	0.63146	0.93113	0.44036	0.80038	-0.049191	-0.27072	0.86549	0.98736	0.78661	0.91942
Nfkbiz	4	0.087384	0.56587	0.67816	0.94154	0.57148	0.85466	0.11268	0.73009	0.65256	0.94463	0.46533	0.7682
Frem2	4	0.2408	1.0825	0.28389	0.76003	0.27902	0.72131	0.44122	1.9857	0.083525	0.45916	0.047071	0.33629
Taf4b	4	-0.044798	-0.30722	0.89815	0.98764	0.75868	0.92536	-0.016195	-0.11113	0.96053	0.99711	0.91151	0.96764
Tll1	4	0.14606	0.81137	0.50791	0.89618	0.41715	0.7915	-0.030141	-0.16744	0.92124	0.99297	0.86703	0.95268
Mapk1ip1	4	0.47071	1.2526	0.044665	0.33671	0.21035	0.66981	0.39361	1.0476	0.11792	0.54245	0.2948	0.66351
Gm11564	6	0.25933	1.3202	0.16202	0.60991	0.18678	0.65214	0.23564	1.2001	0.25439	0.73831	0.23012	0.617
Angpt1	4	-0.15447	-0.94576	0.59689	0.92348	0.34427	0.75619	-0.07191	-0.44056	0.80007	0.9759	0.65953	0.86279
Trove2	4	-0.30755	-2.0364	0.29974	0.77143	0.041707	0.3315	-0.23033	-1.5272	0.42776	0.85541	0.1267	0.5285
Eif4e1b	4	0.092128	0.45261	0.66408	0.93926	0.65083	0.88506	0.087259	0.42887	0.72751	0.96163	0.66802	0.86741
Mpp5	4	0.49628	2.2345	0.035524	0.29624	0.025449	0.24105	0.27712	1.2479	0.26829	0.74873	0.21208	0.60485
NO_SITE_294	1	0.49533	1.2627	0.23247	0.70926	0.20668	0.66708	0.10823	0.27591	0.83884	0.98254	0.78261	0.91766
Atf6b	4	-0.10762	-0.65746	0.71836	0.95624	0.51088	0.82787	0.032435	0.19847	0.89416	0.99117	0.84267	0.94257
Smad7	4	-0.40745	-1.4704	0.18087	0.64	0.14146	0.60336	-0.24726	-0.89356	0.39822	0.84003	0.37156	0.7131
Slc13a3	4	-0.049825	-0.29877	0.88251	0.98587	0.76512	0.92753	-0.17086	-1.025	0.5501	0.91162	0.30537	0.66929
Prpf18	4	-0.18373	-0.62334	0.52835	0.90417	0.53306	0.83637	-0.25701	-0.87311	0.38188	0.83231	0.3826	0.71911
Gm14781	6	0.4331	1.1887	0.021964	0.22276	0.23454	0.68821	0.42289	1.1612	0.044535	0.3342	0.24557	0.62896
Sorcs1	4	-0.046273	-0.18997	0.89369	0.98742	0.84933	0.95749	0.1794	0.73743	0.47334	0.88025	0.46086	0.76588
NO_SITE_276	1	0.4237	0.91961	0.30741	0.77841	0.35778	0.76297	0.10832	0.23513	0.83863	0.98244	0.8141	0.93109
Cd300c2	4	-0.34967	-1.9922	0.24421	0.72427	0.046346	0.35354	-0.30031	-1.7126	0.31612	0.78938	0.086793	0.46065
NO_SITE_971	1	-0.50827	-1.511	0.3493	0.80978	0.13078	0.58794	0.0086328	0.025704	0.97665	0.99784	0.97949	0.99243
Pusl1	4	-0.18305	-0.94144	0.53026	0.90626	0.34648	0.7568	0.051199	0.26365	0.83598	0.98179	0.79205	0.92127
NO_SITE_92	1	0.21539	0.69467	0.61443	0.92907	0.48726	0.81704	0.44563	1.4377	0.31937	0.79201	0.15051	0.5552
Pcdhgc5	4	-0.046662	-0.33704	0.89213	0.98717	0.73609	0.91725	0.10539	0.7621	0.67353	0.95217	0.446	0.75529
Gng7	4	0.12842	0.52571	0.55903	0.91508	0.59909	0.86448	0.29764	1.2195	0.23463	0.71943	0.22264	0.61105
Olfr681	6	0.054748	0.28139	0.72469	0.95775	0.77841	0.93278	0.11723	0.603	0.56461	0.91672	0.54651	0.80891
Hemgn	4	0.15895	0.8625	0.4726	0.88057	0.38841	0.77991	0.028771	0.15618	0.90521	0.99297	0.87589	0.95662
Ahsg	4	0.13167	0.5694	0.54841	0.91243	0.56908	0.85405	0.24424	1.0573	0.3279	0.7968	0.29035	0.66029
Got1	4	0.18503	0.96155	0.4058	0.85053	0.33628	0.75184	-0.11074	-0.57471	0.69536	0.95554	0.56549	0.81797
Dnaja4	4	0.11645	0.50185	0.59277	0.92255	0.61577	0.87025	0.14003	0.60373	0.57376	0.9196	0.54603	0.80867
Dbp	4	0.17318	0.67575	0.43547	0.86411	0.4992	0.82202	0.14998	0.58544	0.54707	0.91144	0.55825	0.81471
Pola2	4	-0.26637	-0.64788	0.36195	0.81873	0.51706	0.83075	-0.1266	-0.30986	0.65481	0.94528	0.75667	0.90731
LOC108168545	8	-0.12291	-0.70945	0.57631	0.91879	0.47804	0.81259	-0.024446	-0.14133	0.92969	0.99297	0.88761	0.95954
Vmn1r233	4	-0.023262	-0.13103	0.96491	0.99611	0.89576	0.97111	0.17656	0.99563	0.48005	0.88164	0.31943	0.67988
Plod3	4	0.12691	0.92436	0.56383	0.91619	0.3553	0.76204	0.12869	0.93782	0.60646	0.93078	0.34834	0.69822
Magi3	4	0.0025677	0.016112	0.94884	0.9928	0.98714	0.99669	0.083382	0.52379	0.73981	0.96442	0.60043	0.83574
LOC108167570	1	-1.2979	-2.3531	0.12308	0.54311	0.01862	0.19222	-1.4581	-2.651	0.10991	0.52624	0.0080251	0.096682
AU022751	4	0.23549	0.80759	0.29433	0.76666	0.41933	0.79198	0.30151	1.0347	0.22779	0.71083	0.30079	0.66754
LOC101055797	1	-0.5178	-1.7813	0.34415	0.80527	0.074863	0.46641	-0.39766	-1.3692	0.44804	0.86562	0.17095	0.57707
Marf1	4	0.14356	0.86045	0.5141	0.89787	0.38954	0.78033	0.1557	0.93358	0.53325	0.9061	0.35052	0.69925
Dcbld2	4	0.10766	0.66346	0.61825	0.9298	0.50704	0.82614	-0.10014	-0.61703	0.72378	0.96151	0.53721	0.80403
Peli2	4	0.20798	1.1816	0.34991	0.81025	0.23735	0.68915	0.10596	0.60214	0.67179	0.95123	0.54708	0.80937
Ankrd11	4	0.027271	0.13171	0.8683	0.98115	0.89521	0.97089	-0.2873	-1.3871	0.33501	0.8028	0.16542	0.57024
Ptprk	4	0.075553	0.30576	0.71672	0.95564	0.75978	0.92585	0.12013	0.48652	0.6309	0.93719	0.6266	0.84889
Wdr12	4	-1.1837	-4.204	0.0019062	0.046316	2.6224e-05	0.0017383	-1.4191	-5.0413	0.00060651	0.022329	4.6233e-07	6.577e-05
Gm16148	1	-0.82044	-0.95337	0.21852	0.69115	0.3404	0.75353	-3.2834	-3.8215	0.019928	0.20291	0.00013262	0.0043922
Gm5921	1	-0.82044	-0.95337	0.21852	0.69115	0.3404	0.75353	-3.2834	-3.8215	0.019928	0.20291	0.00013262	0.0043922
Adra1b	4	0.074436	0.38694	0.72075	0.9567	0.6988	0.90189	0.3982	2.071	0.11385	0.53534	0.038354	0.29554
Elmo2	4	-0.79959	-3.3738	0.020751	0.21279	0.00074141	0.018502	-0.71385	-3.0199	0.038123	0.30459	0.0025288	0.040201
Diexf	4	-0.73879	-1.5156	0.029762	0.26784	0.12961	0.58558	-0.57918	-1.195	0.078976	0.44751	0.23207	0.61944
Gm5884	1	-0.17028	-0.50513	0.69631	0.94876	0.61347	0.86932	0.28621	0.8496	0.52892	0.9039	0.39555	0.72645
Gss	4	0.35225	1.5073	0.12334	0.54362	0.13175	0.58962	-0.047415	-0.20287	0.87038	0.98854	0.83924	0.94181
LOC108168609	18	0.05896	0.61064	0.51419	0.89787	0.54144	0.84063	0.078675	0.81518	0.50002	0.88811	0.41497	0.73856
Zfp956	4	-0.12589	-0.53742	0.66781	0.94009	0.59098	0.86145	-0.17805	-0.7605	0.53377	0.9061	0.44696	0.75575
Serpinb9d	5	-0.054535	-0.33031	0.86908	0.98155	0.74117	0.91969	0.042989	0.26065	0.83936	0.9826	0.79436	0.92238
Dbx2	4	-0.17167	-0.81277	0.55747	0.91464	0.41635	0.79132	0.17115	0.81153	0.49231	0.88624	0.41706	0.73991
Cd86	4	0.19133	0.8697	0.38955	0.83857	0.38446	0.77841	0.12759	0.58014	0.60989	0.93201	0.56182	0.8163
Kcnip2	4	0.19247	0.84261	0.38717	0.8368	0.39944	0.78374	0.13383	0.58615	0.59152	0.92557	0.55777	0.81431
Vav1	4	-0.16707	-1.2783	0.56682	0.91682	0.20115	0.66211	0.19681	1.5079	0.4314	0.85722	0.13158	0.53557
Fam107a	4	0.012086	0.05352	0.91795	0.98935	0.95732	0.98867	0.13183	0.58442	0.59702	0.92755	0.55894	0.81503
Pcp4l1	4	0.15975	0.99686	0.47108	0.88057	0.31883	0.74069	0.17458	1.0898	0.48451	0.88352	0.2758	0.65128
Murc	4	0.20254	1.1098	0.36291	0.81991	0.2671	0.71228	0.25829	1.4157	0.30195	0.78078	0.15686	0.56195
Zfp109	4	0.39191	1.4334	0.087987	0.47014	0.15175	0.61747	0.43584	1.5951	0.086774	0.46712	0.11068	0.5057
Rpe	4	-0.2388	-0.89448	0.41242	0.8545	0.37106	0.76805	0.081447	0.30591	0.74466	0.96542	0.75968	0.90844
Gm41780	2	-1.5488	-2.8086	0.0094009	0.13096	0.0049755	0.073059	-1.3873	-2.5414	0.017112	0.18615	0.01104	0.12281
Slc22a20	4	0.13163	0.73252	0.54846	0.91243	0.46385	0.80852	0.08977	0.49973	0.71966	0.96079	0.61726	0.84444
Atp2b3	4	0.017788	0.099587	0.89923	0.98764	0.92067	0.97831	0.41302	2.3139	0.10272	0.51077	0.020676	0.19243
Hrct1	4	-0.058361	-0.30911	0.85699	0.98099	0.75724	0.92508	-0.0043987	-0.023315	0.99471	0.99857	0.9814	0.99325
Ptgr2	4	-0.15214	-1.0615	0.60239	0.92515	0.28846	0.72561	-0.053071	-0.37062	0.85375	0.98446	0.71092	0.88758
Olfr1105	4	0.34564	1.7016	0.13062	0.55839	0.088828	0.50665	-0.08918	-0.43834	0.75324	0.96766	0.66114	0.86361
Dync1i1	4	0.058551	0.36524	0.77096	0.96912	0.71493	0.90938	0.053193	0.33193	0.82992	0.98176	0.73994	0.89988
4833427G06Rik	4	0.030717	0.18347	0.85821	0.98099	0.85443	0.95956	0.31254	1.8686	0.21241	0.69192	0.06168	0.39314
Gdap1	4	0.21952	0.87523	0.32639	0.79421	0.38145	0.77655	0.3168	1.2638	0.20704	0.68447	0.20631	0.60206
Fbxw26	4	0.33014	1.4709	0.1489	0.591	0.14132	0.60319	0.28974	1.2912	0.24784	0.73328	0.19664	0.59762
Dmxl1	4	-0.20869	-0.84758	0.4739	0.88078	0.39667	0.78245	-0.22347	-0.90868	0.44058	0.86263	0.36352	0.70728
Rgs19	4	0.010095	0.048846	0.92423	0.98943	0.96104	0.9896	0.33037	1.5997	0.18932	0.66692	0.10967	0.50334
Bcan	4	0.17154	0.45755	0.44011	0.8674	0.64727	0.88344	0.55617	1.4867	0.035134	0.29068	0.13711	0.54136
Gm3744	2	0.033259	0.095689	0.90694	0.98878	0.92377	0.97888	-1.2799	-3.6693	0.02387	0.22825	0.00024321	0.0069681
Tbc1d31	4	0.0037153	0.01736	0.94476	0.99195	0.98615	0.99641	-0.056007	-0.26191	0.84634	0.9834	0.79339	0.92169
Gm8121	1	0.078282	0.2016	0.86882	0.98155	0.84023	0.95391	0.28577	0.73631	0.52991	0.90427	0.46154	0.76626
Mgat4d	4	0.15898	0.90241	0.47251	0.88057	0.36684	0.76602	0.19318	1.0972	0.4395	0.86208	0.27254	0.64908
C2cd2l	4	0.099524	0.65778	0.64203	0.93449	0.51068	0.82787	0.077821	0.51458	0.75432	0.96766	0.60685	0.83964
Ankrd44	4	0.10846	0.61863	0.61556	0.92932	0.53616	0.83837	-0.021258	-0.12128	0.94624	0.99508	0.90347	0.96447
Rangap1	4	-0.55624	-1.6793	0.084131	0.46183	0.093103	0.5184	-0.43926	-1.3319	0.16575	0.63147	0.1829	0.58515
Slx1b	4	-0.079588	-0.32255	0.79669	0.97327	0.74704	0.92121	-0.51724	-2.087	0.11095	0.52912	0.036889	0.28875
Gas2l3	4	-0.038086	-0.16987	0.91821	0.98935	0.86511	0.96303	0.33607	1.5018	0.18122	0.65472	0.13314	0.53587
Glipr1l2	4	0.10706	0.56889	0.62002	0.9298	0.56943	0.8543	0.24758	1.3165	0.32106	0.79294	0.18802	0.59101
Pnkd	4	-0.16353	-0.96051	0.57558	0.91879	0.3368	0.75208	0.20877	1.2268	0.40471	0.84394	0.21988	0.60818
Gm16191	1	0.61497	0.40888	0.14894	0.591	0.68263	0.89583	1.1591	0.77088	0.028809	0.25587	0.44078	0.75322
Ctns	4	0.041735	0.22124	0.82242	0.97489	0.82491	0.94743	-0.10758	-0.57047	0.7035	0.95726	0.56836	0.81976
Vti1b	4	-0.038278	-0.17562	0.91756	0.98935	0.86059	0.96157	0.41768	1.9182	0.099077	0.50121	0.055083	0.36896
Enah	4	0.039441	0.15004	0.82966	0.97606	0.88073	0.96648	0.12361	0.47092	0.62137	0.93605	0.63769	0.85404
Mageh1	4	0.25788	1.4469	0.25378	0.73252	0.14792	0.61321	0.20418	1.146	0.41364	0.8472	0.25181	0.63313
Palm	4	0.25765	1.0649	0.254	0.73287	0.2869	0.72554	-0.039149	-0.16177	0.8946	0.99118	0.87149	0.95439
LOC100502592	1	-1.4712	-1.9354	0.10003	0.49774	0.052945	0.38232	-0.57266	-0.75865	0.33202	0.80025	0.44806	0.75631
Vmn1r181	6	-0.0030479	-0.0078735	0.94611	0.99228	0.99372	0.99782	0.25316	0.65608	0.2225	0.70465	0.51177	0.79225
Olfr259	4	0.33853	1.1354	0.13919	0.57478	0.2562	0.70401	0.31876	1.0693	0.20461	0.68143	0.28492	0.65734
Abca1	4	0.37823	1.1629	0.098947	0.4948	0.24485	0.69743	0.44616	1.3724	0.080622	0.45115	0.16995	0.5759
Cd209f	7	-0.29411	-1.3359	0.19885	0.66464	0.18157	0.64619	0.10464	0.47614	0.57973	0.92283	0.63397	0.85225
LOC100862192	5	-0.59609	-2.4012	0.039813	0.31483	0.01634	0.17654	-0.034708	-0.14126	0.90837	0.99297	0.88767	0.95954
Lkaaear1	4	0.13706	0.61334	0.53312	0.9077	0.53965	0.8398	0.1609	0.72032	0.51887	0.89789	0.47133	0.77133
Tbk1	4	0.32135	1.3046	0.15847	0.60443	0.19203	0.65729	0.28006	1.1373	0.2637	0.74715	0.25542	0.63608
Rpl19-ps7	1	-2.8904	-2.7486	0.022961	0.22825	0.0059859	0.083236	-1.3988	-1.351	0.11545	0.53943	0.1767	0.58252
Ifnlr1	4	-0.22364	-1.2973	0.44305	0.86809	0.19453	0.65889	-0.2719	-1.5789	0.35645	0.81783	0.11436	0.50963
Fabp4	4	0.74085	1.554	0.0040289	0.074281	0.12019	0.57052	0.70194	1.4726	0.010701	0.13892	0.14087	0.54541
Tnfaip6	4	0.31413	1.0641	0.16779	0.61968	0.28726	0.72561	0.23258	0.78802	0.3513	0.81549	0.43069	0.74739
Tmem70	4	0.010243	0.061281	0.92384	0.98942	0.95114	0.98732	-0.11499	-0.68819	0.68284	0.95447	0.49133	0.78196
Arl10	4	0.11118	0.52666	0.60737	0.92688	0.59843	0.86448	-0.088569	-0.41949	0.7551	0.96772	0.67486	0.87046
Tbc1d32	4	0.11623	0.6144	0.59347	0.92262	0.53895	0.8393	0.15578	0.824	0.53303	0.9061	0.40994	0.73531
Gulp1	4	-0.24417	-1.1806	0.40177	0.84767	0.23775	0.68952	-0.217	-1.0505	0.45362	0.87077	0.2935	0.66247
Tprg	4	-0.069031	-0.41311	0.82697	0.97592	0.67953	0.89448	0.033477	0.20041	0.89148	0.99106	0.84116	0.94229
Glt6d1	4	0.018478	0.046278	0.89689	0.98764	0.96309	0.99008	0.40318	1.0106	0.10991	0.52624	0.31218	0.67372
NO_SITE_854	1	1.0218	0.69186	0.030802	0.27339	0.48902	0.8177	1.1371	0.77011	0.030845	0.26637	0.44124	0.75346
Recql	4	0.35194	1.5993	0.12355	0.54391	0.10976	0.55443	0.36499	1.659	0.14786	0.5973	0.097109	0.48022
LOC108168436	1	-0.069551	-0.15979	0.86033	0.98099	0.87305	0.96431	-1.1719	-2.6965	0.14712	0.59562	0.0070075	0.086893
Ddx6	4	-0.41091	-2.0305	0.17827	0.63483	0.042306	0.33341	-0.22289	-1.106	0.44158	0.86264	0.26874	0.6461
Slc12a3	4	-0.18433	-0.73592	0.5271	0.90333	0.46178	0.80846	-0.12651	-0.50564	0.65507	0.94542	0.61311	0.84283
Sult5a1	4	0.21183	0.76185	0.34138	0.80318	0.44615	0.80212	0.26948	0.96976	0.28242	0.76242	0.33217	0.68916
Gm10161	1	-0.74379	-0.7793	0.24117	0.72065	0.4358	0.79892	-2.3035	-2.43	0.042629	0.32498	0.015098	0.15434
Stxbp1	4	0.071101	0.43832	0.73145	0.95926	0.66115	0.88789	0.20184	1.2451	0.41949	0.85098	0.21308	0.60485
Usp7	4	-1.5267	-3.9282	0.00017329	0.008316	8.5569e-05	0.0038578	-1.8895	-4.8585	0.00017329	0.012195	1.1828e-06	0.0001241
Tmem33	4	-0.0043762	-0.034079	0.97353	0.99809	0.97281	0.9931	-0.032541	-0.25355	0.9147	0.99297	0.79985	0.92467
Tmtc4	4	0.3384	1.6243	0.13945	0.57523	0.10432	0.54295	0.19187	0.92062	0.44232	0.86317	0.35725	0.7038
Ogfod3	4	-0.084394	-0.51043	0.78322	0.97157	0.60975	0.86748	-0.12051	-0.72922	0.66919	0.95031	0.46587	0.76845
Scgb1b12	4	-0.21687	-0.80745	0.45627	0.87265	0.41941	0.79198	-0.65785	-2.426	0.052506	0.36339	0.015265	0.15555
Pik3r5	4	0.36673	1.0616	0.10943	0.51965	0.28841	0.72561	-0.00094969	-0.0027461	0.99419	0.99857	0.99781	0.99906
Kcna6	4	-0.15602	-1.4064	0.59282	0.92255	0.1596	0.62463	-0.16045	-1.4474	0.57341	0.9196	0.14779	0.55327
Oas2	4	-0.099704	-0.46485	0.73998	0.96044	0.64204	0.88143	0.17318	0.80842	0.48759	0.8854	0.41885	0.74107
Dstn	4	0.087369	0.48408	0.6782	0.94154	0.62833	0.87535	0.013728	0.076086	0.9504	0.99573	0.93935	0.97901
Vegfb	4	-0.077966	-0.34525	0.8012	0.97368	0.72991	0.91444	-0.17996	-0.79718	0.52922	0.9039	0.42535	0.74515
Gm8897	5	-0.979	-3.214	0.0023827	0.053089	0.0013089	0.02845	-1.1434	-3.7487	0.0009964	0.030544	0.00017774	0.0055368
1700040L02Rik	4	-0.10579	-0.5911	0.72326	0.95756	0.55445	0.84632	0.088152	0.49301	0.72512	0.96151	0.622	0.84663
Zbtb9	4	0.27959	0.99039	0.21769	0.69115	0.32198	0.74216	0.065797	0.2327	0.79166	0.9743	0.81599	0.93211
Thap3	4	0.12564	0.32187	0.56678	0.91682	0.74755	0.92148	0.62535	1.6029	0.019625	0.20278	0.10895	0.50251
Atf6	4	0.064676	0.3029	0.75185	0.96453	0.76196	0.92654	0.37829	1.7736	0.13261	0.56717	0.076124	0.43645
Jph3	4	0.088473	0.43444	0.67452	0.94059	0.66397	0.88902	0.014461	0.071046	0.94814	0.99545	0.94336	0.98024
Actn4	4	0.19673	0.67746	0.37586	0.82823	0.49811	0.82133	0.4663	1.6064	0.069185	0.42104	0.1082	0.5011
Smim19	4	0.024319	0.15247	0.87848	0.9847	0.87881	0.96601	0.22263	1.3971	0.37382	0.8282	0.16238	0.56687
C1qtnf1	4	0.36328	1.6109	0.11298	0.52896	0.1072	0.54855	0.2055	0.91143	0.41091	0.84672	0.36207	0.70654
Mars	4	-1.3109	-3.6171	0.00069315	0.022315	0.00029788	0.0096983	-0.51126	-1.4625	0.11502	0.53854	0.1436	0.54836
Olfr1180	4	0.069315	0.35491	0.73678	0.9596	0.72265	0.91168	0.16226	0.83184	0.51536	0.89605	0.4055	0.73212
Hinfp	4	-0.74508	-1.95	0.029026	0.26388	0.051177	0.37502	-1.0908	-2.8519	0.0039423	0.074959	0.0043454	0.060279
Apmap	4	-0.049184	-0.22169	0.88446	0.98655	0.82455	0.9474	0.026898	0.12136	0.91037	0.99297	0.90341	0.96447
Srsf6	4	-0.74285	-2.3932	0.029329	0.26549	0.016701	0.17923	-0.34634	-1.1217	0.25668	0.74044	0.262	0.64071
Tvp23a	4	0.0046724	0.018484	0.94152	0.9917	0.98525	0.99621	0.25778	1.0214	0.30304	0.78226	0.30708	0.67042
Mydgf	4	-0.056075	-0.30389	0.8638	0.98099	0.76121	0.92654	0.029078	0.15768	0.90452	0.99297	0.87471	0.95614
Syt10	4	0.25632	0.97349	0.25595	0.73492	0.33031	0.74722	0.17343	0.65887	0.48659	0.88434	0.50998	0.79162
Zfp748	4	0.39214	1.2142	0.087944	0.47013	0.22466	0.68286	0.4739	1.4682	0.065459	0.41172	0.14204	0.54655
Olfr1056	4	0.26886	1.3561	0.23554	0.71445	0.17507	0.63792	0.29397	1.4834	0.2407	0.72495	0.13797	0.54234
Gm3182	12	-0.42175	-1.7102	0.019841	0.20584	0.087222	0.50359	-0.55895	-2.2526	0.0039423	0.074959	0.024281	0.21608
Tdrd3	4	-0.044523	-0.26389	0.89936	0.98764	0.79187	0.93593	-0.05367	-0.31829	0.85266	0.9841	0.75026	0.90487
Gm4545	13	-0.44322	-2.7952	0.011784	0.1497	0.0051864	0.075183	-0.42673	-2.6987	0.016029	0.17712	0.0069604	0.086659
Abcb1a	4	0.35635	1.2662	0.11953	0.53562	0.20544	0.66597	0.42262	1.5023	0.095785	0.4943	0.13301	0.53587
Gm32940	1	0.33148	0.56867	0.43001	0.86156	0.56958	0.85432	-0.14014	-0.24043	0.7431	0.96501	0.81	0.92918
Tsc22d3	4	0.16418	0.59353	0.45865	0.87431	0.55283	0.84543	0.34713	1.2558	0.16857	0.63607	0.20917	0.60401
Olfr1487	4	0.034743	0.1313	0.84564	0.97973	0.89554	0.97103	0.227	0.85913	0.36351	0.82176	0.39027	0.72321
LOC101056100	3	-0.12799	-0.35947	0.69007	0.94563	0.71925	0.9104	0.28707	0.80978	0.32136	0.79318	0.41806	0.74071
Bad	4	0.02151	0.088817	0.88819	0.98655	0.92923	0.98044	-0.10037	-0.41337	0.72278	0.96151	0.67934	0.87311
Dexi	4	0.4581	1.3461	0.050253	0.35891	0.17826	0.64213	0.51868	1.5249	0.047438	0.3451	0.12729	0.5293
Gltscr1l	4	0.2241	0.74264	0.31699	0.78635	0.4577	0.80631	0.44337	1.4706	0.082398	0.45699	0.1414	0.54589
Ptpn23	4	-0.26302	-0.46803	0.36798	0.82235	0.63976	0.88034	0.63521	1.1329	0.018065	0.1927	0.25725	0.63713
Gm6736	2	0.42718	0.6617	0.17584	0.63232	0.50816	0.82662	0.44178	0.68389	0.1959	0.67451	0.49404	0.78394
Krtap26-1	4	0.37023	1.4699	0.10575	0.5112	0.1416	0.60372	0.37533	1.4904	0.13573	0.57407	0.13612	0.54036
Aste1	4	0.33481	1.3224	0.14396	0.58518	0.18603	0.65145	0.426	1.6836	0.093142	0.48643	0.092254	0.46995
Csde1	4	0.37396	1.2162	0.10267	0.5035	0.22389	0.68216	0.2631	0.85593	0.29299	0.77077	0.39204	0.72456
Myh15	4	0.24266	0.75042	0.28112	0.75806	0.453	0.80401	0.11069	0.34219	0.65815	0.94713	0.73221	0.89646
Ap1b1	4	-0.0076498	-0.019389	0.98375	0.99882	0.98453	0.99606	0.40142	1.0228	0.11138	0.52998	0.30639	0.66981
Gtf2a1	4	-0.87442	-2.9827	0.013127	0.15998	0.0028568	0.049065	-1.3511	-4.5807	0.00086644	0.028011	4.6337e-06	0.00035214
Slc22a29	6	-0.20251	-1.6773	0.40458	0.8497	0.093478	0.51902	-0.10418	-0.86386	0.66555	0.94959	0.38767	0.72183
Tamm41	4	-2.0749	-5.1554	0	0	2.5307e-07	6.0349e-05	-1.5048	-3.7898	0.00030325	0.014199	0.00015079	0.0049231
Tysnd1	4	0.20088	0.86292	0.36655	0.82146	0.38818	0.77984	0.17845	0.76687	0.47567	0.88067	0.44316	0.75428
LOC105242736	1	-0.48018	-1.8635	0.36564	0.82077	0.062387	0.42268	0.083146	0.32453	0.88606	0.99047	0.74554	0.9029
1700009N14Rik	4	-0.16531	-0.76497	0.57155	0.91879	0.44429	0.80173	0.043552	0.20206	0.85977	0.98633	0.83987	0.94213
Vmn1r95	17	-0.45616	-2.3278	0.002556	0.055818	0.019922	0.2015	-0.29339	-1.5056	0.050903	0.35725	0.13218	0.53587
Thsd1	4	0.034654	0.16621	0.84603	0.97975	0.86799	0.96378	0.093899	0.45064	0.70784	0.95793	0.65225	0.86092
Terf2	4	-0.07866	-0.27534	0.79955	0.97368	0.78305	0.93369	-0.8447	-2.9464	0.017589	0.18866	0.0032145	0.047995
Vmn1r24	5	0.17569	0.68477	0.38479	0.83423	0.49349	0.81894	0.10331	0.4024	0.64662	0.94166	0.68739	0.87688
Ppp1r9b	4	-0.081042	-0.47069	0.79292	0.97322	0.63786	0.87933	-0.18132	-1.0535	0.5261	0.90183	0.29209	0.66159
Zmynd19	4	-0.046451	-0.18732	0.89278	0.98717	0.85141	0.95827	-0.27271	-1.0989	0.35524	0.81761	0.27182	0.64892
Nox1	4	0.21941	0.92476	0.3266	0.79421	0.35509	0.76203	0.42676	1.7993	0.092666	0.48481	0.071971	0.42597
Rnf225	4	0.46451	1.5886	0.047351	0.34787	0.11214	0.55741	0.26717	0.91383	0.28597	0.76518	0.36081	0.70562
NO_SITE_128	1	0.0063535	0.012735	0.99186	0.99909	0.98984	0.99739	0.13785	0.27639	0.78335	0.97314	0.78225	0.91747
Heatr4	4	0.14048	0.69008	0.52298	0.90252	0.49015	0.81814	-0.13366	-0.65647	0.63649	0.93796	0.51152	0.79208
Pa2g4	4	-0.90532	-2.5795	0.01122	0.14437	0.0098943	0.1248	-1.6498	-4.6135	0.00021661	0.012195	3.9592e-06	0.00031085
Ndfip1	4	0.094545	0.43443	0.6575	0.93813	0.66398	0.88902	0.3254	1.4963	0.19512	0.67355	0.13458	0.53761
Olfr1355	7	-0.24868	-1.7811	0.27488	0.75035	0.074899	0.46647	-0.52702	-3.7753	0.033488	0.28191	0.00015982	0.0051524
Eif4g2	4	-0.28338	-1.299	0.33605	0.79752	0.19394	0.65825	-0.56498	-2.5856	0.085128	0.46432	0.0097207	0.11186
Slc4a8	4	-0.11913	-0.6545	0.68644	0.94467	0.51279	0.82862	0.085299	0.46956	0.73396	0.96313	0.63867	0.85439
Itgb5	4	0.3341	1.4027	0.14448	0.58567	0.16071	0.6253	0.19097	0.80179	0.44457	0.86456	0.42267	0.74392
Mif-ps6	1	0.41563	0.76905	0.31638	0.78586	0.44186	0.80116	-0.088078	-0.163	0.82043	0.98069	0.87052	0.95398
Nipal3	4	-0.0195	-0.14069	0.9773	0.99836	0.88811	0.96864	0.051106	0.36899	0.83611	0.98179	0.71214	0.88836
Crisp1	4	0.21409	1.1786	0.33631	0.79752	0.23855	0.69038	0.074863	0.41223	0.76381	0.96975	0.68017	0.87355
Mup3	7	-0.29596	-1.4458	0.19655	0.66147	0.14824	0.61389	0.09144	0.44912	0.62587	0.93678	0.65334	0.86148
2510002D24Rik	4	-0.044913	-0.3819	0.8978	0.98764	0.70253	0.90319	0.1241	1.0558	0.61994	0.93554	0.29104	0.66093
Letm2	4	0.051692	0.21538	0.79292	0.97322	0.82947	0.94934	0.34244	1.4276	0.17402	0.64354	0.15342	0.55904
Cldnd1	4	0.21945	1.1237	0.32656	0.79421	0.26115	0.70802	-0.11131	-0.56949	0.69345	0.95489	0.56902	0.82015
LOC108168647	18	0.076586	0.75267	0.4233	0.8591	0.45165	0.80336	0.10472	1.0297	0.37816	0.82953	0.30315	0.66787
Psors1c2	4	-0.14537	-0.55597	0.61924	0.9298	0.57823	0.85705	0.11328	0.4339	0.65078	0.94383	0.66436	0.86572
Gm2318	12	-0.63025	-3.1871	0.0009964	0.028536	0.0014373	0.029648	-0.31437	-1.6107	0.079409	0.44751	0.10724	0.49865
Mss51	4	-0.054709	-0.25718	0.8673	0.98099	0.79704	0.93661	-0.01187	-0.055843	0.97158	0.99751	0.95547	0.98462
Mif4gd	4	-0.072637	-0.37458	0.81696	0.97489	0.70798	0.90624	0.16487	0.8512	0.50856	0.8929	0.39466	0.72609
Olfr247	7	0.17485	1.2115	0.29792	0.76881	0.22569	0.68368	-0.1582	-1.0961	0.4836	0.88333	0.27302	0.64932
Asb17	4	0.16022	0.56166	0.46961	0.88057	0.57435	0.85556	0.4208	1.476	0.096911	0.49623	0.13994	0.54463
2210407C18Rik	4	-0.19562	-1.0387	0.50253	0.89321	0.29895	0.73076	-0.17298	-0.91931	0.54421	0.91064	0.35793	0.70414
G0s2	4	0.15694	0.68497	0.47819	0.88339	0.49336	0.81894	0.28517	1.2452	0.25495	0.73849	0.21305	0.60485
Ssb	4	-0.95023	-2.3695	0.0085777	0.12367	0.017813	0.18636	-1.0951	-2.7173	0.0036824	0.071489	0.0065825	0.082893
Zc2hc1c	4	0.16525	1.1949	0.45553	0.8724	0.23211	0.68752	0.081841	0.59195	0.74362	0.9652	0.55388	0.81228
Gm6496	1	0.76648	0.60772	0.082745	0.45951	0.54338	0.84151	-0.016895	-0.013402	0.93844	0.99487	0.98931	0.99617
Awat1	4	0.19935	0.96178	0.36954	0.82284	0.33616	0.75184	0.222	1.0716	0.37534	0.82947	0.28391	0.65661
NO_SITE_583	1	-0.047288	-0.15816	0.89659	0.98764	0.87433	0.96464	-0.18314	-0.61287	0.68691	0.95489	0.53997	0.8053
Gm20868	17	0.039285	0.39363	0.63224	0.93113	0.69386	0.89888	0.04401	0.44115	0.69194	0.95489	0.6591	0.86239
Ceacam19	4	0.22067	0.96476	0.32435	0.79289	0.33466	0.75105	0.33621	1.4704	0.18113	0.65471	0.14144	0.54589
Asna1	4	-0.6929	-2.6773	0.03834	0.30869	0.0074224	0.098922	-0.43914	-1.7013	0.16579	0.63147	0.088878	0.46409
Gm21118	17	0.025551	0.26361	0.71486	0.95487	0.79208	0.93609	0.12788	1.3201	0.30104	0.77991	0.18681	0.58965
Rab30	4	-0.13286	-0.52544	0.64918	0.93618	0.59928	0.86448	-0.49462	-1.9385	0.12485	0.55545	0.052559	0.35852
Anxa8	4	0.04552	0.3093	0.81133	0.97472	0.75709	0.92504	-0.042591	-0.28948	0.88494	0.99047	0.77221	0.91282
Unc5b	4	-0.031059	-0.14346	0.94065	0.9917	0.88593	0.96812	0.24844	1.1493	0.31907	0.79168	0.25045	0.6322
Trpv6	4	-0.011019	-0.07507	0.99545	0.99926	0.94016	0.98399	-0.25105	-1.7108	0.39137	0.83755	0.087124	0.46169
Rapgef3	4	0.19608	0.9927	0.37768	0.8287	0.32086	0.7416	0.1555	0.78768	0.53377	0.9061	0.43088	0.74739
Fam122a	4	-0.36952	-1.0415	0.22008	0.69342	0.29763	0.72997	-0.50663	-1.4252	0.11762	0.54192	0.15411	0.56037
Rrh	4	0.47083	0.95729	0.044622	0.33671	0.33842	0.75353	0.4961	1.0089	0.055452	0.37372	0.31301	0.67393
Ptpn1	4	-0.42034	-2.2732	0.16965	0.62333	0.023014	0.223	0.069305	0.37625	0.78144	0.973	0.70673	0.88622
Fadd	4	-0.082105	-0.64681	0.79002	0.97284	0.51775	0.831	-0.0057473	-0.045304	0.99129	0.99856	0.96387	0.98704
Adprh	4	0.053292	0.34313	0.78816	0.97242	0.7315	0.91519	-0.13366	-0.86046	0.63649	0.93796	0.38954	0.72263
Mmp20	4	0.042831	0.16817	0.81995	0.97489	0.86645	0.96327	0.018257	0.071766	0.93718	0.99467	0.94279	0.98016
Gm7361	11	-0.58492	-2.3859	0.0029892	0.060793	0.017036	0.18231	-0.41312	-1.6971	0.030369	0.26383	0.08967	0.46526
NO_SITE_507	1	0.78607	0.63885	0.076766	0.44367	0.52292	0.833	1.0918	0.88741	0.035264	0.29155	0.37486	0.71411
Gm7961	2	-0.70345	-2.2084	0.13144	0.55906	0.027218	0.25315	-0.26914	-0.84743	0.49378	0.88637	0.39676	0.72662
Pdk1	4	0.15641	1.2825	0.47918	0.8838	0.19967	0.66045	-0.038138	-0.31278	0.89754	0.99153	0.75444	0.90659
E330017A01Rik	4	-0.0096981	-0.06442	0.9909	0.99909	0.94864	0.98646	-0.26319	-1.7475	0.37019	0.82591	0.080551	0.44841
NO_SITE_851	1	0.66487	0.93039	0.12251	0.54234	0.35217	0.76008	0.66027	0.92412	0.15015	0.6009	0.35543	0.70289
Tbxa2r	4	-0.007063	-0.061643	0.98172	0.99882	0.95085	0.98726	-0.11676	-1.0194	0.67872	0.95404	0.30802	0.67128
Spin4	4	0.13237	0.68251	0.54659	0.91176	0.49492	0.81999	0.15519	0.80071	0.53481	0.90652	0.4233	0.74423
Ryk	4	-0.061739	-0.24808	0.84664	0.97975	0.80407	0.93924	0.24705	0.99381	0.32197	0.79359	0.32032	0.68041
Sft2d2	4	0.18576	1.0348	0.40359	0.84954	0.30074	0.73148	-0.086884	-0.48406	0.7593	0.96856	0.62834	0.84958
LOC108167353	1	-0.52996	-1.2725	0.33748	0.79824	0.20321	0.66404	-0.89437	-2.1487	0.21232	0.69192	0.031657	0.25977
Sh3bgrl	4	0.37332	1.5981	0.10345	0.50592	0.11002	0.55443	0.31239	1.3376	0.21262	0.69192	0.18103	0.58429
Selo	4	0.076771	0.72112	0.71347	0.95468	0.47083	0.81041	0.043893	0.41241	0.8589	0.98632	0.68004	0.8735
Vmn2r28	5	-0.29907	-1.0147	0.2624	0.73986	0.31023	0.73567	-0.091734	-0.31321	0.7311	0.96236	0.75412	0.90644
Gm6341	2	-0.030559	-0.06535	0.94489	0.99195	0.9479	0.98643	-0.28459	-0.6022	0.47186	0.88001	0.54704	0.80937
Gm13283	25	-0.22053	-2.2837	0.077026	0.44494	0.022387	0.21851	-0.1362	-1.4132	0.266	0.74849	0.15761	0.56308
Tmem64	4	0.082909	0.53481	0.6928	0.94689	0.59278	0.86261	0.086537	0.55848	0.72971	0.96223	0.57652	0.82386
Gm5565	3	-0.12612	-0.6678	0.69484	0.94748	0.50426	0.824	-0.045324	-0.24045	0.89009	0.99089	0.80998	0.92918
Grin2a	4	-0.036815	-0.17638	0.92232	0.98941	0.85999	0.96141	0.2544	1.2198	0.30863	0.78437	0.22254	0.61096
Vmn2r113	5	-0.23369	-0.90708	0.37967	0.83032	0.36436	0.76553	-0.60676	-2.3485	0.040593	0.31666	0.018851	0.18019
Fzd6	4	0.067439	0.39428	0.74258	0.96109	0.69337	0.89888	0.043967	0.25723	0.85881	0.98632	0.797	0.92356
Nip7	4	-0.85064	-2.1905	0.015336	0.17586	0.028485	0.26	-0.98187	-2.5314	0.0076247	0.11282	0.011362	0.12548
Eef1akmt1	4	0.029933	0.13983	0.86063	0.98099	0.88879	0.96911	0.10494	0.49055	0.67487	0.95249	0.62374	0.84723
Zbed4-ps3	1	0.11407	0.26917	0.79751	0.97335	0.7878	0.93506	0.42855	1.012	0.33523	0.8028	0.31156	0.67317
Qsox1	4	0.22897	0.744	0.3078	0.77872	0.45688	0.80586	0.20418	0.66373	0.41359	0.84719	0.50687	0.79048
Hsp25-ps1	4	-0.2282	-1.2799	0.43404	0.86296	0.20059	0.66126	-0.12151	-0.68291	0.66659	0.94986	0.49466	0.78417
2310022B05Rik	4	0.44505	1.2118	0.056882	0.38414	0.22558	0.68368	0.51285	1.3972	0.04917	0.35161	0.16236	0.56687
Vrtn	4	-0.1377	-0.58155	0.63735	0.93275	0.56087	0.8507	-0.024705	-0.10445	0.93675	0.99467	0.91681	0.97009
Actl7a	4	0.015418	0.094694	0.90746	0.98878	0.92456	0.97924	-0.10471	-0.6433	0.71074	0.95841	0.52003	0.7957
Nuak2	4	0.15071	0.50469	0.49478	0.88942	0.61378	0.86941	-0.065051	-0.21751	0.82099	0.9808	0.82781	0.9375
NO_SITE_117	1	0.10361	0.31478	0.81705	0.97489	0.75293	0.92363	0.13519	0.41074	0.78764	0.97386	0.68126	0.87395
Klk13	4	0.15808	0.93977	0.47494	0.8817	0.34734	0.75752	-0.02274	-0.13519	0.94251	0.99489	0.89246	0.96144
Olfr730	4	0.14929	1.1126	0.49833	0.89109	0.26586	0.71123	0.096045	0.71606	0.70134	0.95705	0.47395	0.77262
Limd1	4	-0.022152	-0.088402	0.96833	0.99692	0.92956	0.98053	0.22653	0.90461	0.36477	0.8225	0.36567	0.70873
Fam102b	4	0.11511	0.39454	0.59628	0.92334	0.69318	0.89888	0.098757	0.33866	0.69298	0.95489	0.73486	0.89742
Zscan4c	8	-0.2	-1.322	0.34939	0.8099	0.18617	0.65145	-0.28122	-1.8597	0.19296	0.66977	0.062923	0.39793
Triobp	4	0.029156	0.097009	0.86263	0.98099	0.92272	0.97882	0.44058	1.4678	0.083871	0.46029	0.14217	0.54676
B3gnt7	4	0.32714	1.3182	0.15245	0.5948	0.18742	0.65272	0.38828	1.5652	0.12299	0.55251	0.11754	0.51433
Snx9	4	-0.15769	-0.6894	0.58935	0.92212	0.49057	0.81814	-0.25787	-1.1282	0.38041	0.83117	0.25924	0.63811
Gsap	4	0.56831	1.2312	0.017762	0.19052	0.21825	0.67663	0.74043	1.6044	0.0077113	0.1133	0.10862	0.5021
Map4k2	4	0.051056	0.252	0.79426	0.97322	0.80104	0.93797	0.174	0.85991	0.48555	0.88364	0.38984	0.72284
Alms1	4	-0.15979	-1.0144	0.58446	0.92208	0.3104	0.73567	0.26833	1.7052	0.28389	0.76375	0.088155	0.46361
NO_SITE_123	1	0.88867	0.53329	0.052766	0.36984	0.59383	0.86306	0.9193	0.55354	0.06338	0.40414	0.5799	0.82536
Krtcap2	4	-0.21737	-1.2313	0.4554	0.8724	0.21819	0.67663	-0.27105	-1.5366	0.35801	0.81842	0.12439	0.52466
Odf3	4	0.14573	0.93153	0.50873	0.89618	0.35158	0.75998	0.07834	0.50089	0.75311	0.96761	0.61645	0.84422
Marcks	4	0.22166	0.90685	0.3221	0.79087	0.36449	0.76553	0.42527	1.7411	0.093662	0.48826	0.081667	0.45174
Kprp	4	0.14016	0.47959	0.5235	0.90252	0.63152	0.87692	0.28892	0.98934	0.24901	0.73429	0.3225	0.68166
Olfr873	4	0.067946	0.46335	0.74111	0.96048	0.64311	0.88179	-0.006268	-0.042754	0.98978	0.99856	0.9659	0.98824
Gpatch2	4	0.20244	0.97911	0.3633	0.82017	0.32753	0.74552	0.19281	0.93284	0.4405	0.86263	0.3509	0.69939
Thap11	4	-1.2655	-2.9563	0.00086644	0.026178	0.0031135	0.052193	-1.629	-3.7264	0.00021661	0.012195	0.00019422	0.0059775
Ap2b1	4	-0.47443	-2.336	0.12992	0.55743	0.01949	0.19819	-0.78973	-3.8844	0.025127	0.23558	0.0001026	0.0037692
Syap1	4	0.10481	0.54156	0.62574	0.93031	0.58812	0.86048	0.29682	1.5352	0.23606	0.7202	0.12473	0.52529
Defa28	9	-0.058663	-0.38797	0.81748	0.97489	0.69804	0.90154	-0.22672	-1.4998	0.26171	0.74562	0.13367	0.53589
Olfr823	7	0.037802	0.22124	0.77512	0.97007	0.82491	0.94743	-0.0099104	-0.058022	0.98475	0.99847	0.95373	0.98413
Txndc15	4	-0.27202	-1.4177	0.35286	0.81279	0.15628	0.62189	-0.31711	-1.6539	0.29316	0.77077	0.098146	0.48234
Lig3	4	-1.3962	-4.4569	0.0003899	0.015101	8.3153e-06	0.00076471	-1.3577	-4.3457	0.00082312	0.027536	1.3883e-05	0.00083019
Il6ra	4	0.17601	0.80385	0.42837	0.85983	0.42149	0.79292	0.14808	0.67651	0.55205	0.91236	0.49872	0.7868
Fmod	4	0.13512	0.30348	0.53936	0.91108	0.76153	0.92654	0.62954	1.415	0.018932	0.19882	0.15707	0.5623
Fndc8	4	0.11424	0.58526	0.59871	0.92392	0.55837	0.84879	-0.040185	-0.20591	0.89113	0.99106	0.83686	0.9409
Aaed1	4	0.19332	0.91912	0.38479	0.83423	0.35803	0.76297	0.062879	0.2989	0.80055	0.97598	0.76502	0.91053
Vmn1r74	4	0.092257	0.32844	0.66369	0.93926	0.74258	0.91972	0.3352	1.1942	0.18252	0.65766	0.23242	0.61979
Rnf10	4	-0.24712	-1.4055	0.39661	0.84454	0.15986	0.62463	-0.026773	-0.15244	0.9312	0.99307	0.87884	0.9578
Olfr1258	4	0.14657	0.80024	0.50661	0.89568	0.42357	0.79333	0.06426	0.35089	0.7966	0.97537	0.72567	0.89392
Madd	4	-0.11342	-0.83499	0.70251	0.95127	0.40373	0.78683	-0.19216	-1.415	0.50314	0.88864	0.15707	0.5623
Epha8	4	0.19702	0.94212	0.37478	0.82682	0.34613	0.75679	0.19056	0.91161	0.44557	0.86456	0.36197	0.70651
Olfr799	4	0.29443	1.1734	0.19465	0.65881	0.24065	0.69297	0.1978	0.78838	0.42893	0.85591	0.43047	0.74731
Polr3k	4	-1.265	-3.6667	0.00086644	0.026178	0.00024574	0.0083417	-0.70407	-2.0757	0.039899	0.3135	0.037925	0.29347
Gatad1	4	0.75569	1.9604	0.0033791	0.06599	0.049954	0.36911	-0.34397	-0.89174	0.25989	0.74457	0.37253	0.71313
Afg3l1	4	0.31144	1.5217	0.17134	0.62621	0.12809	0.58315	0.23189	1.1333	0.35255	0.81608	0.25709	0.63701
Pde1a	4	0.36767	1.599	0.10813	0.51814	0.10982	0.55443	0.38921	1.6932	0.12243	0.55224	0.090421	0.46637
Clec11a	4	0.11301	0.73032	0.60196	0.92515	0.46519	0.80852	0.08257	0.53381	0.74176	0.96473	0.59347	0.83212
Tcf7l2	4	0.070523	0.29755	0.73335	0.95954	0.76605	0.9279	-0.072278	-0.30505	0.79894	0.9759	0.76033	0.90866
Eif2b2	4	-0.94004	-2.5954	0.009011	0.12706	0.0094477	0.12042	-1.2414	-3.4282	0.0013863	0.03653	0.00060757	0.013669
Gclc	4	0.20595	0.72395	0.35515	0.8141	0.4691	0.81013	0.36643	1.2897	0.14634	0.59451	0.19715	0.59773
Zdhhc19	4	0.11947	0.55127	0.58407	0.92173	0.58145	0.85734	0.1672	0.77183	0.50167	0.88829	0.44021	0.75278
Lce6a	4	-0.064689	-0.52418	0.83819	0.97791	0.60015	0.86458	-0.10185	-0.82573	0.71862	0.96019	0.40896	0.73474
Drosha	4	-1.2389	-3.6929	0.0011697	0.032181	0.00022172	0.0076962	-0.9506	-2.8536	0.009011	0.12568	0.0043221	0.060018
Dtymk	4	0.43695	0.64767	0.061171	0.39541	0.5172	0.83075	-0.1771	-0.25916	0.53628	0.90755	0.79551	0.92271
Mgp	4	0.33357	1.9149	0.14487	0.58595	0.05551	0.39438	0.10364	0.59497	0.67846	0.95404	0.55186	0.81138
Xrcc5	4	-1.8853	-5.3675	0	0	7.9835e-08	2.8794e-05	-1.4985	-4.3536	0.0003899	0.017682	1.3389e-05	0.00080907
Dnajb1	4	0.2594	1.3469	0.25101	0.72954	0.178	0.64156	0.26138	1.3577	0.29654	0.77467	0.17457	0.58132
Olfr1480	8	-0.11643	-0.74043	0.59906	0.92408	0.45904	0.80663	0.031967	0.20359	0.83611	0.98179	0.83868	0.9416
Lcn8	4	0.067159	0.36564	0.74332	0.96129	0.71463	0.90938	0.0075043	0.040873	0.96972	0.99711	0.9674	0.98866
Amdhd2	4	-0.010402	-0.077514	0.99355	0.99909	0.93821	0.98375	0.055186	0.4115	0.82316	0.9811	0.6807	0.87375
Tnks2	4	-0.048913	-0.31646	0.88528	0.98655	0.75165	0.92301	0.063296	0.40992	0.79951	0.9759	0.68187	0.87422
Myh2	4	0.0993	1.0185	0.64251	0.93467	0.30843	0.73459	-0.0016522	-0.016949	0.99571	0.99874	0.98648	0.99497
Gm20781	5	-0.17019	-1.1778	0.52549	0.90276	0.23887	0.69063	-0.099858	-0.69156	0.70658	0.95793	0.48922	0.78172
Olfr639	4	0.44634	1.304	0.056448	0.38256	0.19222	0.65745	0.48532	1.4182	0.059871	0.39117	0.15614	0.56173
Crb2	4	-0.21975	-1.5018	0.45115	0.87077	0.13314	0.59132	-0.30812	-2.106	0.30507	0.78313	0.035202	0.28044
Taf4	4	-0.556	-1.8507	0.084218	0.4619	0.064214	0.42892	-0.081522	-0.27245	0.77507	0.97144	0.78528	0.91904
LOC108168580	18	0.076586	0.75267	0.4233	0.8591	0.45165	0.80336	0.10472	1.0297	0.37816	0.82953	0.30315	0.66787
Crcp	4	-1.0191	-2.3177	0.0054152	0.089799	0.020465	0.20541	-1.2616	-2.8297	0.001343	0.036131	0.0046586	0.06338
Dmbx1	4	-0.11459	-0.42946	0.6987	0.9496	0.66759	0.89022	0.25226	0.94826	0.312	0.78582	0.343	0.69498
Epb41l4a	4	0.22695	0.80101	0.31153	0.7814	0.42313	0.79333	-0.35642	-1.2573	0.24503	0.7299	0.20866	0.60401
Gemin4	4	-0.65598	-1.4934	0.047048	0.34717	0.13534	0.59401	-0.52733	-1.2036	0.10506	0.51629	0.22874	0.61575
Olfr765	5	0.42623	1.7629	0.041242	0.32097	0.077912	0.47679	0.23638	0.97785	0.29836	0.77695	0.32815	0.68657
Ncoa6	4	0.25649	1.6143	0.2556	0.73438	0.10647	0.54741	0.022388	0.14092	0.92436	0.99297	0.88793	0.95965
Snx30	4	0.16986	0.74574	0.44396	0.86855	0.45582	0.8055	0.082827	0.36371	0.74115	0.96473	0.71607	0.89037
Tff1	4	0.0424	0.23798	0.82091	0.97489	0.81189	0.94278	0.078221	0.43917	0.75345	0.96766	0.66054	0.86333
Rps19-ps7	1	1.0185	0.42757	0.031148	0.27474	0.66896	0.89022	0.73348	0.30835	0.11662	0.54068	0.75781	0.908
Gm5527	2	-0.64695	-1.2059	0.15479	0.59823	0.22786	0.68534	-0.86005	-1.5945	0.084911	0.46372	0.11083	0.50585
Palb2	4	-0.72919	-2.9785	0.031495	0.27586	0.0028962	0.049594	-0.44456	-1.8251	0.16064	0.62082	0.067986	0.41517
NO_SITE_251	1	0.18846	0.33646	0.66196	0.93922	0.73652	0.91754	0.056428	0.10077	0.93922	0.99487	0.91973	0.97153
B3gnt3	4	0.14728	0.71128	0.50448	0.89474	0.47691	0.81259	-0.048403	-0.2337	0.86739	0.98747	0.81522	0.93189
Gm5048	2	-0.52461	-1.8783	0.22692	0.7029	0.060338	0.41477	-0.64758	-2.319	0.16367	0.62716	0.020394	0.19129
Gm14598	2	0.653	0.80945	0.048607	0.35139	0.41826	0.7915	0.18141	0.22292	0.59906	0.92785	0.8236	0.93536
Fat3	4	0.042209	0.19438	0.82151	0.97489	0.84588	0.95649	0.14899	0.68653	0.54993	0.91162	0.49238	0.78281
Foxr1	4	0.26681	1.2793	0.23866	0.71853	0.2008	0.6615	0.17462	0.83753	0.48443	0.88352	0.4023	0.72981
Pcgf5	4	0.15539	0.76623	0.48222	0.8854	0.44354	0.80156	0.29838	1.4733	0.23333	0.71735	0.14066	0.54514
Upf2	4	-0.43718	-1.9207	0.15592	0.59953	0.054766	0.39099	-0.54698	-2.4052	0.093792	0.4884	0.016164	0.16044
Egr4	4	-0.20713	-1.4122	0.47697	0.88252	0.1579	0.62303	0.11973	0.81733	0.63194	0.93719	0.41374	0.73842
Gm5538	4	0.24598	1.0977	0.27358	0.7484	0.27232	0.71586	-0.13318	-0.59362	0.63796	0.93874	0.55276	0.81193
Gm8776	1	-2.2876	-3.1431	0.039813	0.31483	0.0016719	0.032845	-4.5157	-6.2989	0.0047654	0.083397	2.998e-10	1.9772e-07
Acaa1a	4	0.066117	0.54672	0.74709	0.96255	0.58457	0.85881	0.14276	1.1811	0.56613	0.91758	0.23756	0.62252
Nsg2	4	0.12696	0.51349	0.56366	0.91619	0.60761	0.86699	0.31368	1.2697	0.21119	0.69139	0.20419	0.60018
Olfr1016	4	0.41773	1.4021	0.072044	0.4296	0.16089	0.6253	0.25691	0.86235	0.30447	0.78303	0.38849	0.72209
Zfp57	4	0.048393	0.29023	0.80241	0.97392	0.77164	0.92944	0.076063	0.45651	0.75974	0.96865	0.64802	0.85844
Gabpb2	4	0.17604	0.88916	0.42824	0.85983	0.37392	0.77023	0.1855	0.93738	0.45765	0.8727	0.34857	0.69822
Pcdhb3	4	0.18825	0.86285	0.3977	0.84538	0.38822	0.77984	0.2237	1.0259	0.37144	0.82689	0.30496	0.66913
Atp5l2-ps	2	-0.17057	-0.51556	0.64684	0.93588	0.60616	0.86699	-0.13069	-0.39555	0.72057	0.96085	0.69244	0.87937
Smn1	4	-1.3737	-3.796	0.00051986	0.018462	0.00014706	0.0057535	-1.0195	-2.8453	0.006195	0.099582	0.0044372	0.061263
2810459M11Rik	4	0.14133	0.80454	0.52064	0.90137	0.42108	0.79284	0.28109	1.6012	0.26205	0.74581	0.10933	0.50328
Hoxa1	4	0.095147	0.52946	0.65568	0.93813	0.59649	0.86417	0.063605	0.35408	0.7989	0.9759	0.72328	0.89345
Gm10250	3	-0.38609	-1.7418	0.26145	0.73913	0.081539	0.48836	-0.63275	-2.8538	0.098644	0.49967	0.0043201	0.060018
Gm5478	2	-0.049989	-0.17377	0.89971	0.98764	0.86205	0.96217	0.090436	0.31459	0.79769	0.97537	0.75308	0.90631
Tac1	4	0.070115	0.52904	0.73452	0.95954	0.59678	0.86417	0.1086	0.8199	0.66374	0.94879	0.41227	0.73691
Olfr619	4	0.34518	1.3798	0.13118	0.55906	0.16766	0.63078	0.19148	0.76553	0.44323	0.8639	0.44396	0.75444
Gm7534	4	0.33335	1.442	0.14517	0.58645	0.1493	0.61495	0.19239	0.83241	0.44145	0.86264	0.40518	0.73176
Itga2b	4	0.074767	0.32065	0.71953	0.95624	0.74848	0.92194	0.025908	0.11118	0.91318	0.99297	0.91147	0.96764
Sdcbp	4	0.24391	1.2465	0.27839	0.75452	0.2126	0.67216	0.095607	0.48865	0.70268	0.95705	0.62509	0.84781
Inpp5e	4	0.098351	0.5232	0.64563	0.93559	0.60084	0.86471	0.098336	0.52349	0.69428	0.95489	0.60063	0.83581
Hmmr	4	0.13461	0.6155	0.54053	0.91108	0.53823	0.83918	-0.042517	-0.19444	0.88502	0.99047	0.84583	0.94357
Gm6583	4	-0.0069179	-0.043438	0.9812	0.99882	0.96535	0.99062	0.10972	0.68951	0.6607	0.94821	0.4905	0.78178
Tuba3a	4	0.25553	0.78525	0.25746	0.73667	0.43231	0.79748	0.296	0.90991	0.23723	0.7202	0.36287	0.70696
Olfr1305	4	0.09914	0.47298	0.64294	0.93467	0.63623	0.87904	0.27467	1.3114	0.27288	0.75296	0.18973	0.59164
Gm20903	8	-0.12291	-0.70945	0.57631	0.91879	0.47804	0.81259	-0.024446	-0.14133	0.92969	0.99297	0.88761	0.95954
Cdc42ep3	4	0.30375	1.3411	0.18135	0.64055	0.1799	0.64422	0.18612	0.82189	0.45635	0.87233	0.41114	0.73606
Kcnf1	4	0.2233	0.8982	0.31881	0.78799	0.36908	0.76733	0.14671	0.59043	0.55573	0.9144	0.5549	0.81279
Foxred2	4	0.208	0.89568	0.34982	0.81025	0.37043	0.76755	0.18344	0.79025	0.46255	0.87531	0.42938	0.74724
Gm4201	17	-0.25085	-1.4882	0.093359	0.48308	0.1367	0.5948	-0.3104	-1.8406	0.039466	0.31113	0.065679	0.40733
Kifc5c-ps	2	-0.79298	-2.3027	0.096391	0.48976	0.021299	0.21127	-0.31973	-0.93472	0.42858	0.85587	0.34993	0.69885
Vmn1r211	5	0.065095	0.23167	0.71823	0.95624	0.81679	0.94458	0.12137	0.43234	0.59121	0.92557	0.6655	0.86643
Snx15	4	0.045424	0.25695	0.81168	0.97472	0.79722	0.93661	0.015172	0.085866	0.94554	0.99489	0.93157	0.97642
Rfx7	4	0.26192	0.89607	0.24702	0.72702	0.37021	0.76755	0.30794	1.0545	0.21873	0.69974	0.29163	0.66141
Rhoq	4	-0.039904	-0.19248	0.91357	0.98932	0.84737	0.95697	-0.37262	-1.7939	0.22727	0.70969	0.072827	0.42779
Sbk2	4	0.15975	0.74965	0.47108	0.88057	0.45347	0.80428	0.17933	0.84192	0.47334	0.88025	0.39984	0.72842
Gm4305	19	-0.36923	-3.4318	0.010094	0.13626	0.00059949	0.015888	-0.50601	-4.7034	0.00060651	0.022329	2.5582e-06	0.00021952
Mtnr1b	4	0.042407	0.29083	0.82091	0.97489	0.77118	0.92929	0.21388	1.468	0.39306	0.83755	0.1421	0.54669
Rnf151	4	0.14512	0.83244	0.51059	0.89716	0.40516	0.78774	-0.05693	-0.32666	0.84391	0.98299	0.74393	0.90225
POTENTIALLY_ACTIVE_7	1	-0.095285	-0.30858	0.81146	0.97472	0.75764	0.92512	0.24005	0.77765	0.60027	0.92807	0.43678	0.75055
Aurka	4	-0.44571	-1.0171	0.14963	0.59154	0.30912	0.73499	-0.16654	-0.38256	0.5602	0.91526	0.70205	0.88449
Cdc27	4	-0.32452	-1.3946	0.27622	0.75224	0.16315	0.62602	0.20889	0.90652	0.40432	0.84373	0.36466	0.70795
Otx2	4	0.4305	0.90307	0.06455	0.40368	0.36649	0.76595	0.70909	1.4889	0.0099207	0.13283	0.13652	0.5409
4933416C03Rik	4	0.11717	0.64767	0.59087	0.92212	0.5172	0.83075	0.21979	1.216	0.38071	0.83117	0.22397	0.61323
LOC105244463	1	-1.2979	-2.3531	0.12308	0.54311	0.01862	0.19222	-1.4581	-2.651	0.10991	0.52624	0.0080251	0.096682
1700012L04Rik	8	-0.05305	-0.375	0.84915	0.9799	0.70766	0.90601	0.15943	1.1302	0.37725	0.82953	0.25839	0.63763
Olfr1322	4	0.10889	0.51255	0.61417	0.92907	0.60827	0.86716	0.21536	1.0145	0.39072	0.83755	0.31035	0.67283
Ly6c1	6	-0.030022	-0.1634	0.94827	0.9928	0.8702	0.96381	0.020683	0.11271	0.905	0.99297	0.91026	0.96703
Fthl17d	12	-0.066112	-0.39154	0.75991	0.96618	0.6954	0.89977	-0.030774	-0.18246	0.88346	0.99043	0.85522	0.94786
Ptk2b	4	0.49267	2.4446	0.036824	0.3026	0.0145	0.16332	0.20628	1.0236	0.4097	0.84672	0.30603	0.66977
Ctrl	4	0.28189	1.0349	0.21431	0.68785	0.30073	0.73148	0.32047	1.1768	0.20227	0.67942	0.23929	0.62376
4930432K21Rik	4	0.011658	0.078528	0.91964	0.98935	0.93741	0.98364	0.12566	0.84713	0.61539	0.93343	0.39692	0.72665
Gm8298	4	0.57735	1.0839	0.016419	0.18366	0.27841	0.72096	0.30224	0.56566	0.2264	0.7096	0.57163	0.82158
Rpl17	4	-1.1454	-1.9302	0.0023827	0.053089	0.053582	0.38564	-0.59847	-1.0565	0.071698	0.42644	0.29074	0.66066
Orai2	4	-0.10086	-0.49258	0.73669	0.9596	0.62231	0.87281	-0.097816	-0.47805	0.73006	0.96223	0.63261	0.85158
Rsph6a	4	0.11239	0.55889	0.60369	0.92551	0.57624	0.85622	0.26947	1.341	0.28242	0.76242	0.17994	0.58384
Adcyap1	4	-0.00025659	-0.0014488	0.95793	0.99403	0.99884	0.99963	-0.014707	-0.083078	0.96413	0.99711	0.93379	0.97705
Dusp9	4	0.10706	0.60765	0.62002	0.9298	0.54342	0.84152	0.32908	1.8689	0.1907	0.66778	0.061642	0.39314
Olfr987	4	0.01225	0.059439	0.91734	0.98935	0.9526	0.98761	0.060289	0.2927	0.80804	0.97772	0.76975	0.91203
Abcg1	4	0.4856	1.3201	0.03938	0.3141	0.18679	0.65214	0.20967	0.56985	0.40237	0.84253	0.56878	0.82001
Gm20867	18	0.076586	0.75267	0.4233	0.8591	0.45165	0.80336	0.10472	1.0297	0.37816	0.82953	0.30315	0.66787
Gm9639	2	-0.25001	-0.65949	0.51596	0.89894	0.50958	0.82714	-0.66291	-1.7509	0.15613	0.61302	0.079959	0.44668
Rpl19-ps1	1	-2.8904	-2.7486	0.022961	0.22825	0.0059859	0.083236	-1.3988	-1.351	0.11545	0.53943	0.1767	0.58252
Tmprss6	4	0.24203	1.4881	0.28185	0.75854	0.13671	0.5948	0.14035	0.86308	0.57302	0.9196	0.3881	0.72197
Lrrc1	4	0.12866	0.57166	0.55807	0.91496	0.56755	0.85364	0.19261	0.85632	0.44084	0.86264	0.39182	0.7243
Mepce	4	-0.15377	-0.52975	0.59828	0.9237	0.59628	0.86417	-0.66114	-2.2768	0.051293	0.35857	0.0228	0.20652
Tspan11	4	-0.071029	-0.33445	0.82143	0.97489	0.73804	0.91831	-0.036328	-0.17115	0.90296	0.99297	0.8641	0.95142
Aipl1	4	0.011842	0.081633	0.91912	0.98935	0.93494	0.98302	0.012481	0.08608	0.95443	0.99643	0.9314	0.97642
Gm15785	1	0.69105	0.92348	0.11095	0.52383	0.35576	0.76219	-0.18288	-0.24432	0.68743	0.95489	0.80698	0.92808
Il17rc	4	-0.32791	-2.2269	0.27189	0.74827	0.025951	0.2448	-0.050532	-0.34382	0.86215	0.98686	0.73098	0.89602
Nmu	4	0.039106	0.12685	0.83091	0.97634	0.89906	0.97222	0.36444	1.183	0.14877	0.59857	0.23679	0.62189
Rgs1	4	-0.00089944	-0.004641	0.96058	0.99475	0.9963	0.99882	0.26335	1.3599	0.2926	0.77077	0.17387	0.5808
Jmjd8	4	0.22101	0.77898	0.32374	0.79264	0.43599	0.79892	0.2954	1.0418	0.23788	0.7206	0.29749	0.66582
Wwp1	4	0.024618	0.14287	0.87753	0.98469	0.88639	0.96812	0.22808	1.3251	0.36122	0.82002	0.18514	0.58691
Olfr1198	4	0.34214	1.4986	0.13456	0.56627	0.13397	0.59233	0.26952	1.1809	0.28237	0.76242	0.23764	0.62252
Obp1b	4	0.39795	1.3892	0.084045	0.46168	0.16477	0.62722	0.29635	1.0349	0.2368	0.7202	0.30073	0.66754
Optc	4	0.11573	0.45822	0.59481	0.92297	0.64679	0.88336	0.042766	0.16937	0.86193	0.98666	0.8655	0.952
Jtb	4	-0.3809	-1.6769	0.20747	0.67891	0.093562	0.51902	-0.17073	-0.75402	0.55023	0.91171	0.45084	0.75814
Smtnl1	4	-0.027446	-0.12819	0.95109	0.99304	0.898	0.97189	0.24728	1.156	0.32141	0.79318	0.24766	0.63035
NO_SITE_148	1	0.66875	0.89265	0.12069	0.53825	0.37205	0.76863	0.64014	0.85457	0.16202	0.6235	0.39279	0.72482
Olfr1294	4	0.1481	0.8132	0.50197	0.89314	0.4161	0.79128	-0.3543	-1.9417	0.2478	0.73328	0.052171	0.35708
Syf2	4	-0.26649	-1.0753	0.36191	0.81873	0.28226	0.72305	0.14909	0.60379	0.54963	0.91162	0.54598	0.80867
Rufy3	4	-0.082687	-0.50552	0.78859	0.97264	0.61319	0.86927	0.083471	0.51117	0.73968	0.96442	0.60923	0.84083
Eml5	4	0.17017	0.52028	0.44305	0.86809	0.60287	0.86597	0.44129	1.3516	0.083525	0.45916	0.17652	0.58247
Chrnd	4	0.12824	0.3623	0.55968	0.91508	0.71713	0.90983	0.50371	1.424	0.052809	0.36399	0.15446	0.5605
Pcdha8	4	0.024734	0.14609	0.87701	0.98453	0.88385	0.9675	0.027405	0.16196	0.90894	0.99297	0.87134	0.95431
Ubxn11	4	0.025282	0.11858	0.87532	0.98422	0.9056	0.97378	0.054886	0.25759	0.82411	0.9811	0.79672	0.92351
2610020H08Rik	4	0.12144	0.83234	0.57848	0.91931	0.40522	0.78774	0.051294	0.35163	0.83581	0.98179	0.72512	0.89392
Plin5	4	-0.283	-1.654	0.33665	0.7976	0.098129	0.53154	-0.23478	-1.3734	0.41983	0.8512	0.16963	0.57565
Olfr119	5	0.74227	1.8371	0.00069315	0.022315	0.066188	0.43362	0.10403	0.25683	0.64454	0.94105	0.79731	0.92368
Scarf2	4	0.26001	0.79907	0.25014	0.72954	0.42425	0.79333	0.20045	0.61614	0.42265	0.8524	0.5378	0.80455
Tada2a	4	-0.90394	-2.3679	0.01122	0.14437	0.017891	0.1867	-1.9097	-4.9243	0.00012997	0.011364	8.4641e-07	0.00010456
Vmn1r79	5	-0.49105	-1.7815	0.081965	0.458	0.074835	0.46641	-0.36156	-1.3176	0.19304	0.66977	0.18763	0.59062
Xpot	4	-0.47879	-2.1104	0.1268	0.55039	0.034828	0.29698	-0.28218	-1.2479	0.34116	0.80761	0.21208	0.60485
NO_SITE_959	1	0.59478	0.7924	0.16059	0.60804	0.42813	0.79512	0.70312	0.93714	0.12845	0.56378	0.34869	0.69822
Srxn1	4	0.42316	1.571	0.068839	0.41959	0.11619	0.56314	0.21424	0.79528	0.39271	0.83755	0.42645	0.7454
Nthl1	4	0.24857	0.40319	0.26907	0.74517	0.68681	0.89775	0.85782	1.3945	0.0027293	0.058605	0.16317	0.56756
INACTIVE_4T_8	1	-0.096961	-0.097198	0.8093	0.97472	0.92257	0.97882	0.7856	0.7891	0.09938	0.50197	0.43005	0.7473
Bcl7b	4	0.084189	0.44501	0.68899	0.94537	0.65631	0.88643	0.33336	1.7638	0.1852	0.66202	0.07777	0.44085
St3gal3	4	0.3621	1.5663	0.11437	0.52896	0.11729	0.56568	0.33799	1.4623	0.17905	0.65164	0.14365	0.54836
Dnaic1	4	-0.024607	-0.14103	0.95997	0.99457	0.88784	0.96857	-0.027377	-0.15698	0.92904	0.99297	0.87526	0.95639
Rplp1	4	-0.92182	-2.6024	0.010311	0.13702	0.0092582	0.11857	-1.4212	-3.9989	0.00060651	0.022329	6.3635e-05	0.0026301
Myo19	4	-0.13473	-0.81131	0.64476	0.93527	0.41719	0.7915	0.012648	0.076199	0.95412	0.99638	0.93926	0.979
Gm8677	16	-0.34462	-1.9251	0.027076	0.25263	0.054214	0.38852	-0.69748	-3.8296	4.3322e-05	0.004878	0.00012835	0.0043922
Akr1b7	4	0.15187	0.64026	0.49127	0.88823	0.522	0.83244	0.2658	1.121	0.28783	0.76626	0.26227	0.64075
Smco2	4	0.17789	0.87748	0.42425	0.85927	0.38023	0.77585	0.2999	1.4804	0.23086	0.71492	0.13876	0.54257
C87977	4	0.083734	0.50345	0.69012	0.94563	0.61465	0.86968	-0.067263	-0.40452	0.81467	0.97948	0.68583	0.87644
Gm16451	18	-0.61732	-3.2924	0.00012997	0.0070922	0.00099319	0.023088	-0.56807	-3.0398	0.00043322	0.01845	0.0023677	0.038219
Stam2	4	-0.17043	-0.83624	0.56028	0.91544	0.40302	0.78597	-0.070074	-0.34423	0.806	0.97752	0.73067	0.89599
Gm15191	1	-1.3455	-1.2824	0.11515	0.52896	0.19972	0.66045	-1.2845	-1.2387	0.13096	0.56378	0.21545	0.60485
Rimbp2	4	0.032323	0.23248	0.85279	0.98019	0.81617	0.94458	-0.035749	-0.25723	0.90487	0.99297	0.797	0.92356
Lmntd2	4	0.22638	0.84535	0.313	0.78328	0.39792	0.78274	0.28356	1.0594	0.25764	0.74143	0.2894	0.6601
NO_SITE_667	1	0.096202	0.27796	0.83265	0.97648	0.78104	0.93308	-1.0768	-3.108	0.16354	0.62708	0.0018834	0.032132
Myb	4	-0.13621	-1.0311	0.64142	0.93442	0.30248	0.73202	-0.046757	-0.35417	0.87242	0.98871	0.72321	0.89345
Rps19-ps6	2	0.54422	0.51002	0.089806	0.47579	0.61004	0.86753	0.065856	0.060867	0.85461	0.98477	0.95147	0.983
Opa1	4	-1.4597	-3.9606	0.00025993	0.010949	7.4746e-05	0.0036131	-1.8279	-4.9619	0.00021661	0.012195	6.9796e-07	8.9011e-05
Mup4	5	-0.24167	-1.009	0.36291	0.81991	0.31296	0.7368	-0.13481	-0.56426	0.60954	0.93198	0.57258	0.82211
Gm14477	6	0.051288	0.25572	0.73691	0.9596	0.79816	0.93661	0.16342	0.8165	0.42659	0.855	0.41422	0.73842
LOC101055737	1	-1.8459	-2.0536	0.064116	0.40239	0.040015	0.32254	-3.6963	-4.1201	0.01291	0.15594	3.7866e-05	0.0017446
Zfp738	4	0.024975	0.1457	0.87606	0.98438	0.88416	0.96754	-0.08442	-0.49276	0.76706	0.96982	0.62219	0.84666
Slc2a10	4	0.14876	0.85213	0.49994	0.89126	0.39414	0.78128	0.22267	1.2762	0.37374	0.8282	0.2019	0.59872
Gm7413	2	-2.3162	-2.888	0.0017329	0.043243	0.0038767	0.060917	-1.6346	-2.0668	0.008881	0.12454	0.038749	0.29696
Rabep2	4	0.025701	0.13904	0.87402	0.98357	0.88942	0.96917	0.089385	0.484	0.72114	0.96103	0.62839	0.84958
LOC100861784	1	-0.20762	-0.64549	0.64606	0.93563	0.51861	0.83103	-0.9078	-2.8219	0.20873	0.68721	0.0047744	0.064675
8030411F24Rik	4	0.29286	0.82717	0.19646	0.66137	0.40814	0.78822	0.42656	1.2055	0.092796	0.48527	0.22803	0.61575
Olfr1110	4	0.203	1.5412	0.36195	0.81873	0.12327	0.57618	0.13115	0.99593	0.5988	0.92785	0.31928	0.67973
Zfp524	4	0.46902	2.026	0.045531	0.34134	0.042766	0.33498	0.26897	1.1619	0.28307	0.76305	0.24529	0.62896
LOC102634495	2	0.15204	0.58842	0.62548	0.93031	0.55625	0.84752	0.10947	0.4239	0.75432	0.96766	0.67164	0.8682
Prl3a1	4	-0.080145	-0.46619	0.79526	0.97322	0.64108	0.88077	0.0060702	0.035328	0.97388	0.99784	0.97182	0.99055
Jade2	4	0.55175	1.7049	0.021488	0.21898	0.088216	0.50528	0.10206	0.3143	0.68267	0.95447	0.7533	0.90631
Ptpn6	4	0.03417	0.13193	0.84716	0.9799	0.89504	0.97089	0.11447	0.44281	0.64675	0.94166	0.6579	0.86239
Ggps1	4	-1.3555	-3.0768	0.00051986	0.018462	0.0020921	0.038944	-2.0825	-4.5749	4.3322e-05	0.004878	4.7642e-06	0.00035796
Hbp1	4	0.25139	1.2743	0.26435	0.74033	0.20254	0.66352	0.036625	0.18558	0.88195	0.99029	0.85277	0.94728
Ndufa1	4	-0.45064	-1.4191	0.14582	0.58685	0.15587	0.62189	-0.45183	-1.4238	0.15492	0.61118	0.1545	0.5605
Olfr314	4	0.39593	1.3838	0.085084	0.46257	0.16641	0.6287	0.30776	1.0757	0.21899	0.70014	0.28205	0.65585
Elovl7	4	-0.03973	-0.18198	0.91427	0.98932	0.8556	0.95964	0.076355	0.35013	0.75904	0.96856	0.72624	0.89392
Dlx3	4	0.23728	0.83674	0.29099	0.76477	0.40274	0.7859	0.4344	1.5329	0.087424	0.46854	0.12529	0.5265
NO_SITE_761	1	-0.49858	-1.3633	0.35446	0.81372	0.17278	0.63538	-0.39425	-1.0787	0.45432	0.87116	0.28073	0.65509
Vmn1r238	7	-0.10562	-0.43	0.65719	0.93813	0.66719	0.89013	-0.70651	-2.8573	0.0062384	0.099654	0.0042731	0.059671
Golt1b	4	-0.92018	-2.3444	0.010354	0.13736	0.019059	0.19498	-1.1011	-2.8023	0.0035091	0.068528	0.0050747	0.067633
Dennd2c	4	0.23215	1.1447	0.30161	0.77338	0.25232	0.70078	0.19273	0.95065	0.44071	0.86263	0.34178	0.69424
Olfr1082	7	-0.1102	-0.85912	0.64121	0.93435	0.39027	0.7807	-0.23386	-1.8226	0.30161	0.78049	0.068367	0.41606
Rad50	4	-2.2465	-5.7384	0	0	9.5563e-09	5.8049e-06	-1.2655	-3.2682	0.0012997	0.035461	0.0010823	0.021189
Isx	4	0.10578	0.65744	0.62319	0.9298	0.5109	0.82787	0.12062	0.75002	0.62912	0.93719	0.45324	0.76009
Speer3	5	-0.24164	-0.94546	0.36299	0.82002	0.34442	0.75637	-0.17098	-0.6702	0.51904	0.89813	0.50273	0.78803
NO_SITE_155	1	-0.11849	-0.35659	0.77304	0.96955	0.7214	0.91114	0.44614	1.3461	0.31881	0.79146	0.17828	0.58342
Scgb2b3	4	-0.10577	-0.46631	0.7233	0.95756	0.64099	0.88077	-0.077298	-0.34121	0.78686	0.97386	0.73295	0.89683
Lrrc51	4	0.053106	0.48746	0.78898	0.97276	0.62593	0.87405	0.092488	0.84935	0.71174	0.95847	0.39569	0.72645
Vmn1r100	18	-0.67396	-4.3092	8.6644e-05	0.0049383	1.6385e-05	0.0012524	-0.21059	-1.3663	0.14322	0.58941	0.17184	0.57796
Vmn2r59	4	0.48534	1.2096	0.039466	0.31446	0.22645	0.68398	-0.42537	-1.0588	0.17662	0.64715	0.28969	0.6601
Nat3	4	-0.1134	-0.65409	0.70255	0.95127	0.51305	0.82862	-0.11173	-0.64492	0.69189	0.95489	0.51898	0.79562
Tmem114	4	0.022366	0.050699	0.88498	0.98655	0.95957	0.98904	0.6273	1.4238	0.019278	0.20081	0.15451	0.5605
Dsg1b	5	-0.084005	-0.49533	0.7749	0.97007	0.62036	0.87206	-0.19088	-1.1265	0.47117	0.88001	0.25995	0.63827
NO_SITE_31	1	0.1051	0.25611	0.81497	0.97472	0.79786	0.93661	0.15612	0.38062	0.75168	0.96728	0.70349	0.8853
Zfp616	4	0.045628	0.33472	0.81116	0.97472	0.73784	0.91824	-0.0072584	-0.05327	0.98683	0.99847	0.95752	0.98474
Rnf40	4	-1.1966	-3.3682	0.0018195	0.045016	0.00075649	0.018781	-1.7943	-4.8952	0.00021661	0.012195	9.819e-07	0.0001122
Arhgef17	4	0.34197	1.2535	0.1349	0.5667	0.21003	0.66951	0.41595	1.5255	0.099987	0.50371	0.12715	0.5292
Sumo2	4	-0.67023	-2.0035	0.043712	0.33322	0.045126	0.34714	-0.75407	-2.2516	0.030325	0.26383	0.024345	0.21639
Gigyf1	4	0.073226	0.50536	0.72417	0.95761	0.61331	0.86932	0.040047	0.27651	0.8712	0.98871	0.78215	0.9174
Fbxl17	4	0.065245	0.24981	0.75025	0.96377	0.80273	0.93881	0.37344	1.4319	0.13824	0.57952	0.15217	0.5578
Mvb12a	4	0.15846	1.0666	0.4736	0.88078	0.28614	0.7254	-0.11307	-0.76072	0.68834	0.95489	0.44682	0.75572
Uhrf1bp1	4	0.085322	0.54265	0.68414	0.94326	0.58737	0.86032	0.13461	0.85645	0.58939	0.92543	0.39175	0.72429
Rhot2	4	-0.014444	-0.087367	0.99277	0.99909	0.93038	0.98065	-0.087696	-0.53093	0.75688	0.9683	0.59547	0.83328
Tiam1	4	-0.24554	-1.8544	0.3993	0.84567	0.063687	0.42729	0.011339	0.085711	0.95819	0.99711	0.9317	0.97642
Fryl	4	0.83793	1.8584	0.0012563	0.0338	0.063106	0.42555	0.4678	1.0372	0.068535	0.41941	0.29967	0.66665
Glrp1	4	0.25411	1.4165	0.26015	0.73827	0.15662	0.62202	0.05631	0.31386	0.82017	0.98063	0.75363	0.90631
Strc	4	0.15283	0.81477	0.48871	0.88764	0.4152	0.79109	-0.12961	-0.69075	0.64667	0.94166	0.48972	0.78178
LOC108168090	1	-0.45335	-0.63163	0.38297	0.83318	0.52763	0.83441	-0.6354	-0.88848	0.30152	0.78044	0.37428	0.71394
Gnl1	4	-0.53609	-2.2043	0.093315	0.48307	0.027501	0.25512	-0.67481	-2.7775	0.047481	0.34519	0.0054773	0.071878
[truncated: 21,085 more rows]

## Sheet: Table S3
Supplement Table 3: Differencial from RIME assay
	X.Spec.1SKO_1_R1	X.Spec.1SKO_1_R2	X.Spec.3DKO_1_R1	X.Spec.3DKO_1_R2	X.Spec.IgGPool_R1	X.Spec.IgGPool_R2	logFC	AveExpr	t	P.Value	adj.P.Val	B	lpval	fcSKO	fcDKO	col	gene	label
Q9QXS1	38	37	48	36	148	116	4.5	39.75	0.808432	0.492823	0.780424	-9.68052	0	-1.7885	-1.62902	Common	Plec
P04264	23	39	18	130	67	83	43	52.5	0.822202	0.486302	0.771228	-9.66804	0	-1.24793	-0.0191088	Common	KRT1
P63260	45	39	53	44	78	71	6.5	45.25	1.29998	0.306871	0.611457	-9.18406	1	-0.81214	-0.609048	Common	Actg1
P63258	45	39	53	44	78	71	6.5	45.25	1.29998	0.306871	0.611457	-9.18406	1	-0.81214	-0.609048	Common	ACTG1
P60709	45	39	53	44	78	71	6.5	45.25	1.29998	0.306871	0.611457	-9.18406	1	-0.81214	-0.609048	Common	ACTB
P60712	45	39	53	44	78	71	6.5	45.25	1.29998	0.306871	0.611457	-9.18406	1	-0.81214	-0.609048	Common	ACTB
P60710	45	39	53	44	78	71	6.5	45.25	1.29998	0.306871	0.611457	-9.18406	1	-0.81214	-0.609048	Common	Actb
O88569	47	45	41	47	20	23	-2	45	-0.684091	0.555415	0.855707	-9.78739	0	1.06274	1	Common	Hnrnpa2b1
P99024	32	26	26	24	52	45	-4	27	-1.36818	0.287799	0.611457	-9.1103	1	-0.722466	-0.928917	Common	Tubb5
P16858	22	25	28	26	47	35	3.5	25.25	2.09995	0.151746	0.551803	-8.32279	1	-0.777608	-0.584963	Common	Gapdh
Q8VEK3	23	18	24	28	14	10	5.5	23.25	1.85817	0.185488	0.611457	-8.57811	1	0.725825	1.05445	Common	Hnrnpu
P68372	27	22	20	21	47	39	-4	22.5	-1.69702	0.213334	0.611457	-8.75201	1	-0.787006	-1.03317	Common	Tubb4b
P61979	32	26	34	29	19	21	2.5	30.25	0.692452	0.550997	0.855707	-9.78056	0	0.514573	0.63005	Common	Hnrnpk
P08775	16	15	23	18	0	0	5	18	2.12127	0.14916	0.546078	-8.30066	1	4.04439	4.42626	Common	Polr2a
P26039	13	15	11	6	17	13	-5.5	11.25	-2.20942	0.139059	0.525116	-8.20997	1	-0.0931094	-0.752072	Common	Tln1
Q3U0V1	24	16	20	17	9	8	-1.5	19.25	-0.379791	0.735857	1	-9.99196	0	1.14439	1.03747	Common	Khsrp
P11499	16	13	11	12	31	29	-3	13	-2.05226	0.157739	0.5641	-8.37251	1	-1	-1.31034	Common	Hsp90ab1
P52480	19	14	18	16	31	25	0.5	16.75	0.200856	0.856949	1	-10.0633	0	-0.728698	-0.688056	Common	Pkm
Q9D0E1	31	26	27	31	11	14	0.5	28.75	0.168924	0.879358	1	-10.0716	0	1.12776	1.152	Common	Hnrnpm
Q80U70	19	17	18	16	0	0	-1	17.5	-0.76483	0.51401	0.806877	-9.71923	0	4.24793	4.16993	Common	Suz12
P17182	13	10	18	14	34	33	4.5	13.75	1.94696	0.172084	0.611457	-8.48345	1	-1.46467	-1.02106	Common	Eno1
Q8BG05	22	19	24	20	14	12	1.5	21.25	0.648985	0.574297	0.881023	-9.81546	0	0.61891	0.716207	Common	Hnrnpa3
Q8VIJ6	17	14	27	18	7	9	7	19	1.59622	0.233395	0.611457	-8.86174	1	0.874469	1.38466	Common	Sfpq
Q78PY7	14	14	16	14	12	10	1	14.5	1.08162	0.37817	0.611457	-9.41479	0	0.321928	0.415037	Common	Snd1
Q9JHU4	6	1	0	1	23	22	-3	2	-1.27276	0.31488	0.611457	-9.21333	1	-2.38466	-3.96963	Common	Dync1h1
P19096	7	5	5	3	32	26	-2	5	-1.52966	0.2479	0.611457	-8.93438	1	-2.09954	-2.58496	Common	Fasn
Q99K48	43	43	40	43	13	11	-1.5	42.25	-1.08163	0.378165	0.611457	-9.41477	0	1.75899	1.70895	Common	Nono
P13020	6	5	7	5	8	8	0.5	5.75	0.483718	0.670134	0.968868	-9.9327	0	-0.469485	-0.36257	Common	Gsn
Q8BFZ3	22	17	23	18	34	29	1	20	0.305935	0.784775	1	-10.0264	0	-0.664816	-0.596103	Common	Actbl2
P68104	20	16	16	16	25	23	-2	17	-1.08164	0.378164	0.611457	-9.41477	0	-0.395929	-0.556393	Common	EEF1A1
P62630	20	16	16	16	25	23	-2	17	-1.08164	0.378164	0.611457	-9.41477	0	-0.395929	-0.556393	Common	Eef1a1
P10126	20	16	16	16	25	23	-2	17	-1.08164	0.378164	0.611457	-9.41477	0	-0.395929	-0.556393	Common	Eef1a1
Q68FD5	5	5	4	2	22	17	-2	4	-2.16324	0.144236	0.529847	-8.25733	1	-1.77259	-2.35755	Common	Cltc
Q8K310	11	12	14	12	7	8	1.5	12.25	1.45115	0.266422	0.611457	-9.02004	1	0.556393	0.719892	Common	Matr3
P58252	9	7	11	9	23	19	2	9	1.52966	0.2479	0.611457	-8.93438	1	-1.28951	-1	Common	Eef2
O70133	13	11	13	12	6	6	0.5	12.25	0.483718	0.670134	0.968868	-9.9327	0	0.893085	0.947533	Common	Dhx9
P27659	16	12	15	16	7	2	1.5	14.75	0.787009	0.503131	0.79558	-9.69969	0	1.44746	1.58496	Common	Rpl3
Q922F4	15	14	15	13	31	24	-0.5	14.25	-0.483718	0.670134	0.968868	-9.9327	0	-0.878694	-0.925999	Common	Tubb6
Q9JKF1	5	5	7	4	16	14	0.5	5.25	0.360545	0.74844	1	-10.0016	0	-1.41504	-1.29956	Common	Iqgap1
Q7TPR4	7	5	6	6	19	11	-7.40149e-17	6	-8.0056e-17	1	1	-10.0919	0	-1.19265	-1.19265	Common	Actn1
Q8BTI8	12	12	18	11	7	4	2.5	13.25	0.772603	0.510174	0.805537	-9.71242	0	1	1.25376	Common	Srrm2
P62908	15	15	22	13	16	17	2.5	16.25	0.600914	0.601006	0.919386	-9.8522	0	-0.129283	0.0801703	Common	Rps3
P60843	8	7	11	6	12	11	1	8	0.424255	0.707263	1	-9.9681	0	-0.556393	-0.395929	Common	Eif4a1
Q69ZN7	2	0	1	0	23	15	-0.5	0.75	-0.483718	0.670134	0.968868	-9.9327	0	-3.32193	-3.73697	Common	Myof
P07900	6	6	6	6	18	14	0	6	0	1	1	-10.0919	0	-1.28011	-1.28011	Common	HSP90AA1
P04406	10	10	12	9	25	12	0.5	10.25	0.360545	0.74844	1	-10.0016	0	-0.825971	-0.76184	Common	GAPDH
Q8C2Q3	14	11	11	9	3	2	-2.5	11.25	-1.49996	0.254721	0.611457	-8.9668	1	1.94753	1.65208	Common	Rbm14
Q9Z2X1	12	10	14	12	9	8	2	12	1.52966	0.2479	0.611457	-8.93438	1	0.337035	0.559427	Common	Hnrnpf
Q8CGC7	11	11	10	3	8	9	-4.5	8.75	-1.39068	0.281809	0.611457	-9.08587	1	0.337035	-0.341037	Common	Eprs
O35737	15	18	18	14	12	9	-0.5	16.25	-0.216328	0.846161	1	-10.0588	0	0.605721	0.563901	Common	Hnrnph1
P51660	2	2	4	2	14	12	1	2.5	1.08162	0.37817	0.611457	-9.41479	0	-2.22239	-1.80735	Common	Hsd17b4
P47911	11	12	12	12	3	7	0.5	11.75	1.08155	0.378197	0.611457	-9.41486	0	1.05889	1.11548	Common	Rpl6
Q8VDJ3	9	7	7	4	9	9	-2.5	6.75	-1.49996	0.254721	0.611457	-8.9668	1	-0.152003	-0.621488	Common	Hdlbp
P56959	13	7	11	7	4	3	-1	9.5	-0.299994	0.788781	1	-10.0288	0	1.28951	1.152	Common	Fus
Q501J6	16	11	15	23	9	8	5.5	16.25	1.2612	0.318357	0.611457	-9.22574	0	0.610053	1.074	Common	Ddx17
P80314	2	2	2	3	12	9	0.5	2.25	1.08155	0.378197	0.611457	-9.41486	0	-1.9386	-1.71621	Common	Cct2
Q61188	9	10	9	7	0	0	-1.5	8.75	-1.45115	0.266422	0.611457	-9.02004	1	3.39232	3.16993	Common	Ezh2
B2RQC6	1	0	0	0	9	11	-0.5	0.25	-1.08155	0.378197	0.611457	-9.41486	0	-2.87447	-3.45943	Common	Cad
Q62318	9	10	10	9	10	8	-5.55112e-16	9.5	-8.49103e-16	1	1	-10.0919	0	0.0703893	0.0703893	Common	Trim28
O88342	6	4	4	3	9	6	-1.5	4.25	-1.45115	0.266422	0.611457	-9.02004	1	-0.5025	-0.917538	Common	Wdr1
P11983	1	1	2	0	9	10	0	1	0	1	1	-10.0919	0	-2.39232	-2.39232	Common	Tcp1
Q8CAQ8	0	0	0	0	13	8	0	0	0	1	1	-10.0919	0	-3.52356	-3.52356	Common	Immt
P25206	5	5	5	5	6	6	0	5	0	1	1	-10.0919	0	-0.222392	-0.222392	Common	Mcm3
Q6P4T2	6	8	9	2	6	5	-1.5	6.25	-0.445726	0.693705	1	-9.95577	0	0.29956	0	Common	Snrnp200
P20029	3	5	7	5	11	10	2	5	1.52966	0.2479	0.611457	-8.93438	1	-1.20163	-0.716207	Common	Hspa5
Q99020	6	10	5	4	5	5	-3.5	6.25	-1.83635	0.188981	0.611457	-8.6015	1	0.584963	-0.125531	Common	Hnrnpab
P05064	5	3	5	5	10	9	1	4.5	1.08162	0.37817	0.611457	-9.41479	0	-1.07039	-0.807355	Common	Aldoa
P97351	8	7	10	8	5	5	1.5	8.25	1.45115	0.266422	0.611457	-9.02004	1	0.5025	0.736966	Common	Rps3a
P38647	2	1	3	1	13	10	0.5	1.75	0.483718	0.670134	0.968868	-9.9327	0	-2.32193	-2.05889	Common	Hspa9
Q64727	4	4	4	2	7	8	-1	3.5	-1.08162	0.37817	0.611457	-9.41479	0	-0.765535	-1.08746	Common	Vcl
Q8VDP4	3	4	4	3	0	2	3.70074e-17	3.5	5.66069e-17	1	1	-10.0919	0	1.16993	1.16993	Common	Ccar2
P80318	4	3	3	2	12	6	-1	3	-1.52961	0.247912	0.611457	-8.93443	1	-1.152	-1.51457	Common	Cct3
Q7TMK9	5	3	5	4	4	4	0.5	4.25	0.483718	0.670134	0.968868	-9.9327	0	0	0.137504	Common	Syncrip
O60506	5	3	4	4	4	4	-7.40149e-17	4	-8.0056e-17	1	1	-10.0919	0	0	0	Common	SYNCRIP
P18760	6	7	5	6	5	5	-1	6	-1.52961	0.247912	0.611457	-8.93443	1	0.321928	0.115477	Common	Cfl1
P62754	9	5	8	12	6	7	3	8.5	1.14726	0.354989	0.611457	-9.34659	0	0.0931094	0.552541	Common	Rps6
P14869	3	4	6	3	9	8	1	4	0.684087	0.555417	0.855707	-9.7874	0	-1.078	-0.788496	Common	Rplp0
P58771	5	4	4	6	13	11	0.5	4.75	0.483718	0.670134	0.968868	-9.9327	0	-1.24101	-1.11548	Common	Tpm1
P80317	3	2	3	1	7	10	-0.5	2.25	-0.483718	0.670134	0.968868	-9.9327	0	-1.44057	-1.66297	Common	Cct6a
P14206	8	6	8	8	7	6	1	7.5	1.08162	0.37817	0.611457	-9.41479	0	0.0931094	0.263034	Common	Rpsa
P14148	11	8	14	8	3	1	1.5	10.25	0.483726	0.670129	0.968868	-9.9327	0	1.80735	2	Common	Rpl7
Q91V92	3	3	3	1	5	5	-1	2.5	-1.08162	0.37817	0.611457	-9.41479	0	-0.584963	-1	Common	Acly
Q60598	5	5	4	2	6	4	-2	4	-2.16324	0.144236	0.529847	-8.25733	1	0	-0.584963	Common	Cttn
Q61033	2	1	4	0	5	3	0.5	1.75	0.262336	0.814394	1	-10.0434	0	-1	-0.736966	Common	Tmpo
Q9Z204	5	11	10	8	4	6	1	8.5	0.342046	0.760647	1	-10.0104	0	0.584963	0.736966	Common	Hnrnpc
P12970	10	8	11	8	7	6	0.5	9.25	0.299992	0.788782	1	-10.0288	0	0.415037	0.485427	Common	Rpl7a
Q3UPL0	4	4	3	1	5	7	-2	3	-2.16324	0.144236	0.529847	-8.25733	1	-0.485427	-1.22239	Common	Sec31a
P97855	6	5	5	3	4	1	-1.5	4.75	-1.45115	0.266422	0.611457	-9.02004	1	0.893085	0.514573	Common	G3bp1
P29341	5	2	6	5	9	4	2	4.5	1.36817	0.287801	0.611457	-9.11031	1	-0.736966	-0.206451	Common	Pabpc1
O08810	7	4	6	2	5	4	-1.5	4.75	-0.648985	0.574297	0.881023	-9.81546	0	0.241008	-0.137504	Common	Eftud2
P54116	0	0	2	0	8	8	1	0.5	1.08162	0.37817	0.611457	-9.41479	0	-3.16993	-2.16993	Common	Stom
P49717	3	3	2	4	4	4	0	3	0	1	1	-10.0919	0	-0.321928	-0.321928	Common	Mcm4
Q62167	7	3	7	7	7	6	2	6	1.08164	0.378164	0.611457	-9.41477	0	-0.321928	0.0931094	Common	Ddx3x
Q62095	7	3	7	7	7	6	2	6	1.08164	0.378164	0.611457	-9.41477	0	-0.321928	0.0931094	Common	Ddx3y
O00571	7	3	7	7	6	6	2	6	1.08164	0.378164	0.611457	-9.41477	0	-0.222392	0.192645	Common	DDX3X
Q03265	3	2	2	2	8	9	-0.5	2.25	-1.08155	0.378197	0.611457	-9.41486	0	-1.44057	-1.66297	Common	Atp5f1a
Q8CGP6	6	7	17	8	5	5	6	9.5	1.43337	0.270842	0.611457	-9.03942	1	0.321928	1.16993	Common	Hist1h2ah
Q8R1M2	6	7	17	8	5	5	6	9.5	1.43337	0.270842	0.611457	-9.03942	1	0.321928	1.16993	Common	H2afj
Q8BFU2	6	7	17	8	5	5	6	9.5	1.43337	0.270842	0.611457	-9.03942	1	0.321928	1.16993	Common	Hist3h2a
C0HKE9	6	7	17	8	5	5	6	9.5	1.43337	0.270842	0.611457	-9.03942	1	0.321928	1.16993	Common	Hist1h2ap
Q8CGP5	6	7	17	8	5	5	6	9.5	1.43337	0.270842	0.611457	-9.03942	1	0.321928	1.16993	Common	Hist1h2af
C0HKE7	6	7	17	8	5	5	6	9.5	1.43337	0.270842	0.611457	-9.03942	1	0.321928	1.16993	Common	Hist1h2an
C0HKE3	6	7	17	8	5	5	6	9.5	1.43337	0.270842	0.611457	-9.03942	1	0.321928	1.16993	Common	Hist1h2ad
Q8CGP7	6	7	17	8	5	5	6	9.5	1.43337	0.270842	0.611457	-9.03942	1	0.321928	1.16993	Common	Hist1h2ak
C0HKE2	6	7	17	8	5	5	6	9.5	1.43337	0.270842	0.611457	-9.03942	1	0.321928	1.16993	Common	Hist1h2ac
P04908	6	7	17	8	5	5	6	9.5	1.43337	0.270842	0.611457	-9.03942	1	0.321928	1.16993	Common	HIST1H2AB
Q93077	6	7	17	8	5	5	6	9.5	1.43337	0.270842	0.611457	-9.03942	1	0.321928	1.16993	Common	HIST1H2AC
Q7L7L0	6	7	17	8	5	5	6	9.5	1.43337	0.270842	0.611457	-9.03942	1	0.321928	1.16993	Common	HIST3H2A
C0HKE5	6	7	17	8	5	5	6	9.5	1.43337	0.270842	0.611457	-9.03942	1	0.321928	1.16993	Common	Hist1h2ag
C0HKE6	6	7	17	8	5	5	6	9.5	1.43337	0.270842	0.611457	-9.03942	1	0.321928	1.16993	Common	Hist1h2ai
C0HKE4	6	7	17	8	5	5	6	9.5	1.43337	0.270842	0.611457	-9.03942	1	0.321928	1.16993	Common	Hist1h2ae
C0HKE1	6	7	17	8	5	5	6	9.5	1.43337	0.270842	0.611457	-9.03942	1	0.321928	1.16993	Common	Hist1h2ab
C0HKE8	6	7	17	8	5	5	6	9.5	1.43337	0.270842	0.611457	-9.03942	1	0.321928	1.16993	Common	Hist1h2ao
Q921M3	7	6	6	4	6	5	-1.5	5.75	-1.45115	0.266422	0.611457	-9.02004	1	0.206451	-0.115477	Common	Sf3b3
P16546	1	1	1	0	9	6	-0.5	0.75	-1.08155	0.378197	0.611457	-9.41486	0	-2.08746	-2.5025	Common	Sptan1
P63038	2	4	3	6	5	2	1.5	3.75	0.899977	0.450986	0.725879	-9.59547	0	-0.169925	0.289507	Common	Hspd1
Q921F2	4	5	9	6	7	5	3	6	2.05226	0.157739	0.5641	-8.37251	1	-0.347923	0.280108	Common	Tardbp
Q64152	5	5	4	1	4	1	-2.5	3.75	-1.80272	0.194528	0.611457	-8.63767	1	0.777608	0	Common	Btf3
Q8BL97	8	7	9	7	6	6	0.5	7.75	0.483718	0.670134	0.968868	-9.9327	0	0.280108	0.36257	Common	Srsf7
Q99878	5	7	15	5	4	5	4	8	0.848512	0.474068	0.752933	-9.64388	0	0.347923	1	Common	HIST1H2AJ
Q96KK5	5	7	15	5	4	5	4	8	0.848512	0.474068	0.752933	-9.64388	0	0.347923	1	Common	HIST1H2AH
Q64523	5	7	15	5	4	5	4	8	0.848512	0.474068	0.752933	-9.64388	0	0.347923	1	Common	Hist2h2ac
Q16777	5	7	15	5	4	5	4	8	0.848512	0.474068	0.752933	-9.64388	0	0.347923	1	Common	HIST2H2AC
Q6FI13	5	7	15	5	4	5	4	8	0.848512	0.474068	0.752933	-9.64388	0	0.347923	1	Common	HIST2H2AA3
P20671	5	7	15	5	4	5	4	8	0.848512	0.474068	0.752933	-9.64388	0	0.347923	1	Common	HIST1H2AD
Q6GSS7	5	7	15	5	4	5	4	8	0.848512	0.474068	0.752933	-9.64388	0	0.347923	1	Common	Hist2h2aa1
P0C0S8	5	7	15	5	4	5	4	8	0.848512	0.474068	0.752933	-9.64388	0	0.347923	1	Common	HIST1H2AG
P11276	0	0	4	0	6	6	2	1	1.08164	0.378164	0.611457	-9.41477	0	-2.80735	-1.22239	Common	Fn1
P62242	8	9	13	10	6	5	3	10	2.05226	0.157739	0.5641	-8.37251	1	0.547488	0.943416	Common	Rps8
Q8R326	6	5	4	1	0	1	-3	4	-2.05226	0.157739	0.5641	-8.37251	1	2.11548	1.22239	Common	Pspc1
Q9WVA4	4	2	4	2	6	5	-2.22045e-16	3	-1.69826e-16	1	1	-10.0919	0	-0.70044	-0.70044	Common	Tagln2
P17879	3	4	4	2	9	8	-0.5	3.25	-0.483718	0.670134	0.968868	-9.9327	0	-1.078	-1.24793	Common	Hspa1b
Q61696	3	4	4	2	9	8	-0.5	3.25	-0.483718	0.670134	0.968868	-9.9327	0	-1.078	-1.24793	Common	Hspa1a
Q8C854	6	3	6	6	2	2	1.5	5.25	1.08163	0.378165	0.611457	-9.41477	0	0.874469	1.22239	Common	Myef2
P01834	8	7	7	6	5	5	-1	7	-1.52961	0.247912	0.611457	-8.93443	1	0.5025	0.321928	Common	IGKC
Q60973	4	1	2	2	3	0	-0.5	2.25	-0.360545	0.74844	1	-10.0016	0	0.485427	0.263034	Common	Rbbp7
P17751	4	3	5	2	4	6	-3.70074e-17	3.5	-2.53163e-17	1	1	-10.0919	0	-0.415037	-0.415037	Common	Tpi1
Q6PDM2	8	8	11	8	8	4	1.5	8.75	1.08163	0.378165	0.611457	-9.41477	0	0.36257	0.584963	Common	Srsf1
P62702	4	6	9	4	6	4	1.5	5.75	0.602568	0.60007	0.919257	-9.85097	0	0	0.321928	Common	Rps4x
P50580	6	5	4	5	4	1	-1	5	-1.52961	0.247912	0.611457	-8.93443	1	0.893085	0.652077	Common	Pa2g4
P14733	1	2	6	3	4	5	3	3	2.05226	0.157739	0.5641	-8.37251	1	-1.1375	0	Common	Lmnb1
P62751	7	6	7	4	2	1	-1	6	-0.684087	0.555417	0.855707	-9.7874	0	1.58496	1.37851	Common	Rpl23a
P70227	1	0	0	0	8	5	-0.5	0.25	-1.08155	0.378197	0.611457	-9.41486	0	-2.32193	-2.90689	Common	Itpr3
P84104	14	9	10	10	6	7	-1.5	10.75	-0.648985	0.574297	0.881023	-9.81546	0	0.736966	0.552541	Common	Srsf3
P53026	3	6	4	7	4	2	1	5	0.50989	0.654217	0.968868	-9.91591	0	0.459432	0.70044	Common	Rpl10a
Q9Z1R2	5	3	4	2	0	0	-1	3.5	-0.76483	0.51401	0.806877	-9.71923	0	2.32193	2	Common	Bag6
P60123	2	3	5	3	6	6	1.5	3.25	1.45115	0.266422	0.611457	-9.02004	1	-1	-0.485427	Common	Ruvbl1
P60122	2	3	5	3	6	6	1.5	3.25	1.45115	0.266422	0.611457	-9.02004	1	-1	-0.485427	Common	Ruvbl1
Q9CW46	3	4	4	2	2	1	-0.5	3.25	-0.483718	0.670134	0.968868	-9.9327	0	0.847997	0.678072	Common	Raver1
Q9EPU0	2	3	2	0	6	6	-1.5	1.75	-1.45115	0.266422	0.611457	-9.02004	1	-1	-1.80735	Common	Upf1
P47754	1	0	2	1	5	5	1	1	1.52961	0.247912	0.611457	-8.93443	1	-2	-1.26303	Common	Capza2
Q02053	3	1	2	1	3	3	-0.5	1.75	-0.483718	0.670134	0.968868	-9.9327	0	-0.415037	-0.678072	Common	Uba1
O88477	0	0	4	1	4	3	2.5	1.25	1.80272	0.194528	0.611457	-8.63767	1	-2.16993	-0.36257	Common	Igf2bp1
Q9CSN1	2	2	7	2	1	1	2.5	3.25	1.08164	0.378163	0.611457	-9.41476	0	0.584963	1.45943	Common	Snw1
Q9Z1Q9	1	3	1	1	2	4	-1	1.5	-1.08162	0.37817	0.611457	-9.41479	0	-0.415037	-1	Common	Vars
Q8BMF4	1	0	1	0	5	4	1.4803e-16	0.5	2.26427e-16	1	1	-10.0919	0	-1.87447	-1.87447	Common	Dlat
O55201	3	2	4	2	1	1	0.5	2.75	0.483718	0.670134	0.968868	-9.9327	0	0.807355	1	Common	Supt5h
Q9DCD0	2	2	3	2	3	7	0.5	2.25	1.08155	0.378197	0.611457	-9.41486	0	-1	-0.777608	Common	Pgd
Q61792	4	4	4	4	5	5	0	4	0	1	1	-10.0919	0	-0.263034	-0.263034	Common	Lasp1
Q6A068	2	2	2	4	1	2	1	2.5	1.08162	0.37817	0.611457	-9.41479	0	0.263034	0.678072	Common	Cdc5l
Q91VM5	5	7	7	7	2	4	1	6.5	1.08162	0.37817	0.611457	-9.41479	0	0.807355	1	Common	Rbmxl1
P40142	3	5	3	2	3	3	-1.5	3.25	-1.45115	0.266422	0.611457	-9.02004	1	0.321928	-0.192645	Common	Tkt
Q9JIF0	3	3	4	3	4	5	0.5	3.25	1.08155	0.378197	0.611457	-9.41486	0	-0.459432	-0.289507	Common	Prmt1
Q9CPR4	8	5	4	2	3	3	-3.5	4.75	-2.09995	0.151746	0.551803	-8.32279	1	0.906891	0	Common	Rpl17
Q9EQK5	0	1	0	0	4	6	-0.5	0.25	-1.08155	0.378197	0.611457	-9.41486	0	-2	-2.58496	Common	Mvp
Q61881	4	3	4	1	7	3	-1	3	-0.684087	0.555417	0.855707	-9.7874	0	-0.415037	-0.777608	Common	Mcm7
Q61029	1	0	3	0	4	3	1	1	0.684087	0.555417	0.855707	-9.7874	0	-1.58496	-0.847997	Common	Tmpo
Q9JMH9	0	0	0	0	2	3	0	0	0	1	1	-10.0919	0	-1.80735	-1.80735	Common	Myo18a
P62264	11	11	5	9	5	5	-4	9	-2.16328	0.144232	0.529847	-8.25729	1	1	0.415037	Common	Rps14
Q9D051	1	0	2	0	5	5	0.5	0.75	0.483718	0.670134	0.968868	-9.9327	0	-2	-1.58496	Common	Pdhb
Q8BU30	1	2	2	0	5	3	-0.5	1.25	-0.483718	0.670134	0.968868	-9.9327	0	-1	-1.32193	Common	Iars
Q8QZT1	0	0	0	0	5	3	0	0	0	1	1	-10.0919	0	-2.32193	-2.32193	Common	Acat1
P80313	0	0	2	0	4	4	1	0.5	1.08162	0.37817	0.611457	-9.41479	0	-2.32193	-1.32193	Common	Cct7
P04104	4	5	3	9	10	13	1.5	5.25	0.533463	0.640113	0.968868	-9.90019	0	-1.18442	-0.836501	Common	Krt1
Q9R0P3	3	1	0	1	3	2	-1.5	1.25	-1.45115	0.266422	0.611457	-9.02004	1	-0.222392	-1.22239	Common	Esd
P17742	4	4	3	5	4	3	0	4	0	1	1	-10.0919	0	0.152003	0.152003	Common	Ppia
P56480	0	0	0	0	7	6	0	0	0	1	1	-10.0919	0	-2.90689	-2.90689	Common	Atp5f1b
Q99L45	3	1	2	1	2	1	-0.5	1.75	-0.483718	0.670134	0.968868	-9.9327	0	0.263034	0	Common	Eif2s2
Q9Z248	4	2	3	3	0	0	-2.22045e-16	3	-2.40168e-16	1	1	-10.0919	0	2	2	Common	Aebp2
Q62261	0	1	0	0	7	1	-0.5	0.25	-1.08155	0.378197	0.611457	-9.41486	0	-1.73697	-2.32193	Common	Sptbn1
Q5SWU9	0	1	0	0	6	6	-0.5	0.25	-1.08155	0.378197	0.611457	-9.41486	0	-2.22239	-2.80735	Common	Acaca
Q9D2G2	1	0	0	0	4	4	-0.5	0.25	-1.08155	0.378197	0.611457	-9.41486	0	-1.73697	-2.32193	Common	Dlst
P97434	1	0	0	0	3	1	-0.5	0.25	-1.08155	0.378197	0.611457	-9.41486	0	-1	-1.58496	Common	Mprip
Q9WTM5	2	2	3	1	4	3	0	2	0	1	1	-10.0919	0	-0.584963	-0.584963	Common	Ruvbl2
Q7TPV4	3	2	2	5	2	3	1	3	0.684087	0.555417	0.855707	-9.7874	0	0	0.36257	Common	Mybbp1a
Q922Q4	0	0	0	0	6	6	0	0	0	1	1	-10.0919	0	-2.80735	-2.80735	Common	Pycr2
Q9CQE8	1	2	4	2	2	3	1.5	2.25	1.45115	0.266422	0.611457	-9.02004	1	-0.485427	0.192645	Common	RTRAF
O70194	1	1	4	1	4	5	1.5	1.75	1.08163	0.378165	0.611457	-9.41477	0	-1.45943	-0.652077	Common	Eif3d
P63037	0	0	0	1	5	2	0.5	0.25	1.08155	0.378197	0.611457	-9.41486	0	-2.16993	-1.58496	Common	Dnaja1
Q8BGQ7	0	0	0	0	3	6	0	0	0	1	1	-10.0919	0	-2.45943	-2.45943	Common	Aars
P61358	7	5	6	4	5	3	-1	5.5	-0.76483	0.51401	0.806877	-9.71923	0	0.485427	0.263034	Common	Rpl27
O55029	0	1	1	0	3	3	1.11022e-16	0.5	1.69821e-16	1	1	-10.0919	0	-1.41504	-1.41504	Common	Copb2
Q6ZWV3	4	5	7	4	4	3	1	5	0.684087	0.555417	0.855707	-9.7874	0	0.289507	0.530515	Common	Rpl10
Q8VH51	2	3	4	3	3	1	1	3	1.52961	0.247912	0.611457	-8.93443	1	0.222392	0.584963	Common	Rbm39
Q9EQH3	0	0	0	0	4	3	0	0	0	1	1	-10.0919	0	-2.16993	-2.16993	Common	Vps35
P46935	1	1	1	2	2	2	0.5	1.25	1.08155	0.378197	0.611457	-9.41486	0	-0.584963	-0.263034	Common	Nedd4
Q99LF4	3	3	2	4	4	3	0	3	0	1	1	-10.0919	0	-0.169925	-0.169925	Common	Rtcb
Q62418	1	1	1	0	4	3	-0.5	0.75	-1.08155	0.378197	0.611457	-9.41486	0	-1.16993	-1.58496	Common	Dbnl
P26443	3	4	1	3	3	2	-1.5	2.75	-1.45115	0.266422	0.611457	-9.02004	1	0.36257	-0.222392	Common	Glud1
Q9DBR1	2	1	2	1	1	0	-1.11022e-16	1.5	-1.69821e-16	1	1	-10.0919	0	0.736966	0.736966	Common	Xrn2
Q8BJ71	0	0	1	0	5	2	0.5	0.25	1.08155	0.378197	0.611457	-9.41486	0	-2.16993	-1.58496	Common	Nup93
Q91VX2	3	2	4	2	1	1	0.5	2.75	0.483718	0.670134	0.968868	-9.9327	0	0.807355	1	Common	Ubap2
P67778	4	4	4	1	4	4	-1.5	3.25	-1.08163	0.378165	0.611457	-9.41477	0	0	-0.514573	Common	Phb
Q8BVY0	3	2	3	3	0	0	0.5	2.75	1.08155	0.378197	0.611457	-9.41486	0	1.80735	2	Common	Rsl1d1
P08113	2	2	3	1	4	4	0	2	0	1	1	-10.0919	0	-0.736966	-0.736966	Common	Hsp90b1
Q8JZQ9	3	1	4	1	6	5	0.5	2.25	0.299992	0.788782	1	-10.0288	0	-1.11548	-0.893085	Common	Eif3b
Q9DBN5	0	0	0	0	4	4	0	0	0	1	1	-10.0919	0	-2.32193	-2.32193	Common	Lonp2
O88685	0	0	0	0	3	3	0	0	0	1	1	-10.0919	0	-2	-2	Common	Psmc3
Q9WVR4	5	2	1	2	0	1	-2	2.5	-1.36817	0.287801	0.611457	-9.11031	1	1.58496	0.736966	Common	Fxr2
Q91VC3	3	2	2	2	5	4	-0.5	2.25	-1.08155	0.378197	0.611457	-9.41486	0	-0.652077	-0.874469	Common	Eif4a3
Q9CQ19	5	4	3	4	3	4	-1	4	-1.52961	0.247912	0.611457	-8.93443	1	0.289507	0	Common	Myl9
O35129	3	1	3	2	1	1	0.5	2.25	0.483718	0.670134	0.968868	-9.9327	0	0.584963	0.807355	Common	Phb2
P02057	5	9	5	5	0	0	-2	6	-1.08164	0.378164	0.611457	-9.41477	0	3	2.58496	Common	HBB1
A2A6Q5	3	2	2	5	0	0	1	3	0.684087	0.555417	0.855707	-9.7874	0	1.80735	2.16993	Common	Cdc27
P62196	1	0	0	0	5	5	-0.5	0.25	-1.08155	0.378197	0.611457	-9.41486	0	-2	-2.58496	Common	Psmc5
Q3UJB9	0	1	0	0	4	3	-0.5	0.25	-1.08155	0.378197	0.611457	-9.41486	0	-1.58496	-2.16993	Common	Edc4
Q62448	5	3	7	4	1	0	1.5	4.75	0.899977	0.450986	0.725879	-9.59547	0	1.73697	2.11548	Common	Eif4g2
Q64511	3	2	3	2	1	1	-3.70074e-17	2.5	-5.66069e-17	1	1	-10.0919	0	0.807355	0.807355	Common	Top2b
P63325	2	2	2	3	2	1	0.5	2.25	1.08155	0.378197	0.611457	-9.41486	0	0.263034	0.485427	Common	Rps10
Q8CGY8	2	5	1	1	1	1	-2.5	2.25	-1.80272	0.194528	0.611457	-8.63767	1	1.16993	0	Common	Ogt
P14824	0	1	0	0	2	2	-0.5	0.25	-1.08155	0.378197	0.611457	-9.41486	0	-1	-1.58496	Common	Anxa6
Q60634	3	1	3	3	4	2	1	2.5	1.08162	0.37817	0.611457	-9.41479	0	-0.415037	0	Common	Flot2
Q8VDW0	2	0	3	2	4	2	1.5	1.75	1.45115	0.266422	0.611457	-9.02004	1	-1	-0.192645	Common	Ddx39a
P54823	1	1	2	0	3	3	0	1	0	1	1	-10.0919	0	-1	-1	Common	Ddx6
P62259	2	1	2	2	2	3	0.5	1.75	1.08155	0.378197	0.611457	-9.41486	0	-0.485427	-0.222392	Common	Ywhae
P62827	1	0	1	2	3	2	1	1	1.52961	0.247912	0.611457	-8.93443	1	-1.22239	-0.485427	Common	Ran
Q6PDQ2	1	0	2	1	3	3	1	1	1.52961	0.247912	0.611457	-8.93443	1	-1.41504	-0.678072	Common	Chd4
P11103	1	2	2	2	0	0	0.5	1.75	1.08155	0.378197	0.611457	-9.41486	0	1.32193	1.58496	Common	Parp1
Q91YQ5	1	2	1	1	4	1	-0.5	1.25	-1.08155	0.378197	0.611457	-9.41486	0	-0.485427	-0.807355	Common	Rpn1
F6ZDS4	0	0	1	0	4	1	0.5	0.25	1.08155	0.378197	0.611457	-9.41486	0	-1.80735	-1.22239	Common	Tpr
P26369	1	3	3	4	1	1	1.5	2.75	1.45115	0.266422	0.611457	-9.02004	1	0.584963	1.16993	Common	U2af2
Q9CR57	5	1	5	5	3	2	2	4	1.08164	0.378164	0.611457	-9.41477	0	0.192645	0.777608	Common	Rpl14
Q60864	3	2	2	3	4	3	-3.70074e-17	2.5	-5.66069e-17	1	1	-10.0919	0	-0.36257	-0.36257	Common	Stip1
Q9CZN7	0	0	3	1	2	3	2	1	2.16324	0.144236	0.529847	-8.25733	1	-1.80735	-0.222392	Common	Shmt2
Q3TWW8	3	1	8	3	2	3	3.5	3.75	1.40599	0.277818	0.611457	-9.06923	1	-0.222392	0.893085	Common	Srsf6
P0C0L5	3	0	2	2	0	0	0.5	1.75	0.360545	0.74844	1	-10.0016	0	1.32193	1.58496	Common	C4B
P0C0L4	3	0	2	2	0	0	0.5	1.75	0.360545	0.74844	1	-10.0016	0	1.32193	1.58496	Common	C4A
P70670	3	2	3	5	2	3	1.5	3.25	1.45115	0.266422	0.611457	-9.02004	1	0	0.514573	Common	Naca
Q60817	3	2	3	5	2	3	1.5	3.25	1.45115	0.266422	0.611457	-9.02004	1	0	0.514573	Common	Naca
Q6PFR5	3	2	3	1	1	1	-0.5	2.25	-0.483718	0.670134	0.968868	-9.9327	0	0.807355	0.584963	Common	Tra2a
P14602	1	3	0	0	2	2	-2	1	-2.16324	0.144236	0.529847	-8.25733	1	0	-1.58496	Common	Hspb1
Q9WUA3	0	0	0	0	1	3	0	0	0	1	1	-10.0919	0	-1.58496	-1.58496	Common	Pfkp
O88291	3	2	4	2	0	0	0.5	2.75	0.483718	0.670134	0.968868	-9.9327	0	1.80735	2	Common	Znf326
Q9CU62	1	2	1	1	3	0	-0.5	1.25	-1.08155	0.378197	0.611457	-9.41486	0	0	-0.321928	Common	Smc1a
Q08509	0	0	3	0	0	0	1.5	0.75	1.08163	0.378165	0.611457	-9.41477	0	0	1.32193	Common	Eps8
Q8BP47	0	1	0	0	3	1	-0.5	0.25	-1.08155	0.378197	0.611457	-9.41486	0	-1	-1.58496	Common	Nars
O55222	2	2	2	0	3	2	-1	1.5	-1.08162	0.37817	0.611457	-9.41479	0	-0.222392	-0.807355	Common	Ilk
Q9JJI8	2	4	2	2	3	2	-1	2.5	-1.08162	0.37817	0.611457	-9.41479	0	0.192645	-0.222392	Common	Rpl38
Q3UEB3	3	4	3	1	3	1	-1.5	2.75	-1.45115	0.266422	0.611457	-9.02004	1	0.584963	0	Common	Puf60
Q6NZJ6	2	2	1	2	6	2	-0.5	1.75	-1.08155	0.378197	0.611457	-9.41486	0	-0.736966	-1	Common	Eif4g1
Q60972	2	1	2	4	1	0	1.5	2.25	1.45115	0.266422	0.611457	-9.02004	1	0.736966	1.41504	Common	Rbbp4
Q921F4	4	3	3	4	2	1	-3.70074e-17	3.5	-5.66069e-17	1	1	-10.0919	0	0.847997	0.847997	Common	Hnrnpll
Q8BMJ2	1	1	2	0	4	3	0	1	0	1	1	-10.0919	0	-1.16993	-1.16993	Common	Lars
Q922D8	0	1	0	0	5	5	-0.5	0.25	-1.08155	0.378197	0.611457	-9.41486	0	-2	-2.58496	Common	Mthfd1
Q9ERU9	0	0	0	0	5	4	0	0	0	1	1	-10.0919	0	-2.45943	-2.45943	Common	Ranbp2
Q9JKB3	1	2	0	2	1	1	-0.5	1.25	-0.483718	0.670134	0.968868	-9.9327	0	0.321928	0	Common	Ybx3
Q9WVA3	3	1	2	0	2	2	-1	1.5	-0.76483	0.51401	0.806877	-9.71923	0	0	-0.584963	Common	Bub3
O09167	5	3	5	6	4	3	1.5	4.75	1.45115	0.266422	0.611457	-9.02004	1	0.152003	0.530515	Common	Rpl21
P51150	1	1	2	0	3	3	0	1	0	1	1	-10.0919	0	-1	-1	Common	Rab7a
P62996	2	2	3	2	2	3	0.5	2.25	1.08155	0.378197	0.611457	-9.41486	0	-0.222392	0	Common	Tra2b
P47963	6	4	6	5	4	0	0.5	5.25	0.483718	0.670134	0.968868	-9.9327	0	1	1.11548	Common	Rpl13
P19253	0	5	5	4	2	2	2	3.5	0.84851	0.474069	0.752933	-9.64388	0	0.222392	0.874469	Common	Rpl13a
P08752	1	1	1	0	3	2	-0.5	0.75	-1.08155	0.378197	0.611457	-9.41486	0	-0.807355	-1.22239	Common	Gnai2
P70336	0	0	0	0	2	2	0	0	0	1	1	-10.0919	0	-1.58496	-1.58496	Common	Rock2
Q8C8U0	0	0	0	0	3	2	0	0	0	1	1	-10.0919	0	-1.80735	-1.80735	Common	Ppfibp1
Q569Z6	3	2	6	3	1	1	2	3.5	1.36817	0.287801	0.611457	-9.11031	1	0.807355	1.45943	Common	Thrap3
P97315	1	1	1	1	4	4	0	1	0	1	1	-10.0919	0	-1.32193	-1.32193	Common	Csrp1
P43276	3	1	6	3	1	2	2.5	3.25	1.49996	0.254721	0.611457	-8.9668	1	0.263034	1.1375	Common	Hist1h1b
P62192	1	0	1	0	3	1	1.4803e-16	0.5	2.26427e-16	1	1	-10.0919	0	-1	-1	Common	Psmc1
P80316	0	0	0	0	3	2	0	0	0	1	1	-10.0919	0	-1.80735	-1.80735	Common	Cct5
Q8CI51	1	2	3	1	5	5	0.5	1.75	0.483718	0.670134	0.968868	-9.9327	0	-1.26303	-1	Common	Pdlim5
O08528	0	0	0	0	3	2	0	0	0	1	1	-10.0919	0	-1.80735	-1.80735	Common	Hk2
Q8BG81	2	3	2	2	2	2	-0.5	2.25	-1.08155	0.378197	0.611457	-9.41486	0	0.222392	0	Common	Poldip3
Q9CZX8	3	0	2	3	2	2	1	2	0.684087	0.555417	0.855707	-9.7874	0	-0.263034	0.222392	Common	Rps19
Q8CIE6	0	1	1	0	5	3	1.11022e-16	0.5	1.69821e-16	1	1	-10.0919	0	-1.73697	-1.73697	Common	Copa
Q7TNC4	2	3	2	2	2	2	-0.5	2.25	-1.08155	0.378197	0.611457	-9.41486	0	0.222392	0	Common	Luc7l2
Q2QL92	1	2	1	2	3	3	1.11022e-16	1.5	1.69821e-16	1	1	-10.0919	0	-0.678072	-0.678072	Common	TES
P47226	1	2	1	2	3	3	1.11022e-16	1.5	1.69821e-16	1	1	-10.0919	0	-0.678072	-0.678072	Common	Tes
P32067	1	2	2	5	0	0	2	2.5	1.36817	0.287801	0.611457	-9.11031	1	1.32193	2.16993	Common	Ssb
Q569Z5	3	1	1	0	2	0	-1.5	1.25	-1.45115	0.266422	0.611457	-9.02004	1	0.584963	-0.415037	Common	Ddx46
Q99MN1	1	1	1	1	3	0	0	1	0	1	1	-10.0919	0	-0.321928	-0.321928	Common	Kars
Q9Z2U0	1	1	1	1	3	1	0	1	0	1	1	-10.0919	0	-0.584963	-0.584963	Common	Psma7
Q99M28	1	3	1	3	1	1	-2.96059e-16	2	-2.26435e-16	1	1	-10.0919	0	0.584963	0.584963	Common	Rnps1
Q9R190	2	1	0	2	3	3	-0.5	1.25	-0.483718	0.670134	0.968868	-9.9327	0	-0.678072	-1	Common	Mta2
Q9DCL9	1	1	2	1	4	4	0.5	1.25	1.08155	0.378197	0.611457	-9.41486	0	-1.32193	-1	Common	Paics
P46471	0	0	0	0	2	3	0	0	0	1	1	-10.0919	0	-1.80735	-1.80735	Common	Psmc2
Q811U3	0	0	0	0	1	1	0	0	0	1	1	-10.0919	0	-1	-1	Common	Erc1
Q99MI1	0	0	0	0	1	1	0	0	0	1	1	-10.0919	0	-1	-1	Common	Erc1
Q8R1G6	3	1	0	0	3	1	-2	1	-2.16324	0.144236	0.529847	-8.25733	1	0	-1.58496	Common	Pdlim2
Q6DFW4	2	1	3	1	0	0	0.5	1.75	0.483718	0.670134	0.968868	-9.9327	0	1.32193	1.58496	Common	Nop58
Q810A7	2	2	2	1	1	0	-0.5	1.75	-1.08155	0.378197	0.611457	-9.41486	0	1	0.736966	Common	Ddx42
P49718	2	2	2	1	3	2	-0.5	1.75	-1.08155	0.378197	0.611457	-9.41486	0	-0.222392	-0.485427	Common	Mcm5
Q922V4	1	2	1	0	2	1	-1	1	-1.52961	0.247912	0.611457	-8.93443	1	0	-0.736966	Common	Plrg1
P47753	0	0	0	0	2	3	0	0	0	1	1	-10.0919	0	-1.80735	-1.80735	Common	Capza1
P40124	0	0	0	0	3	2	0	0	0	1	1	-10.0919	0	-1.80735	-1.80735	Common	Cap1
Q91W50	1	0	1	0	1	1	1.4803e-16	0.5	2.26427e-16	1	1	-10.0919	0	-0.415037	-0.415037	Common	Csde1
Q9QZQ8	2	1	1	2	1	1	-1.11022e-16	1.5	-1.69821e-16	1	1	-10.0919	0	0.321928	0.321928	Common	H2afy
Q6ZQ38	1	0	1	0	3	4	1.4803e-16	0.5	2.26427e-16	1	1	-10.0919	0	-1.58496	-1.58496	Common	Cand1
Q9JII5	2	1	3	2	1	1	1	2	1.52961	0.247912	0.611457	-8.93443	1	0.321928	0.807355	Common	Dazap1
P60867	2	0	2	1	2	1	0.5	1.25	0.483718	0.670134	0.968868	-9.9327	0	-0.321928	0	Common	Rps20
Q9CQR2	1	2	1	2	1	2	1.11022e-16	1.5	1.69821e-16	1	1	-10.0919	0	0	0	Common	Rps21
Q5XJY5	0	0	0	0	2	1	0	0	0	1	1	-10.0919	0	-1.32193	-1.32193	Common	Arcn1
P12259	1	0	2	0	0	0	0.5	0.75	0.483718	0.670134	0.968868	-9.9327	0	0.584963	1	Common	F5
Q9JKX6	1	1	2	1	0	0	0.5	1.25	1.08155	0.378197	0.611457	-9.41486	0	1	1.32193	Common	Nudt5
P01948	2	2	1	5	0	0	1	2.5	0.54082	0.635757	0.968868	-9.89517	0	1.58496	2	Common	Hemoglobin
P17427	0	0	0	0	2	2	0	0	0	1	1	-10.0919	0	-1.58496	-1.58496	Common	Ap2a2
O54724	0	0	0	0	1	2	0	0	0	1	1	-10.0919	0	-1.32193	-1.32193	Common	Cavin1
Q9CSH3	1	1	2	1	3	1	0.5	1.25	1.08155	0.378197	0.611457	-9.41486	0	-0.584963	-0.263034	Common	Dis3
P29788	5	2	3	1	0	0	-1.5	2.75	-0.899977	0.450986	0.725879	-9.59547	0	2.16993	1.58496	Common	Vtn
Q61768	1	0	0	0	1	2	-0.5	0.25	-1.08155	0.378197	0.611457	-9.41486	0	-0.736966	-1.32193	Common	Kif5b
P99026	0	0	1	0	2	2	0.5	0.25	1.08155	0.378197	0.611457	-9.41486	0	-1.58496	-1	Common	Psmb4
P14685	0	0	0	0	3	1	0	0	0	1	1	-10.0919	0	-1.58496	-1.58496	Common	Psmd3
Q5SWD9	0	1	2	0	0	0	0.5	0.75	0.483718	0.670134	0.968868	-9.9327	0	0.584963	1	Common	Tsr1
D3YXK2	2	1	1	2	0	0	-1.11022e-16	1.5	-1.69821e-16	1	1	-10.0919	0	1.32193	1.32193	Common	Safb
P62984	1	1	2	1	1	2	0.5	1.25	1.08155	0.378197	0.611457	-9.41486	0	-0.321928	0	Common	Uba52
P0CG50	1	1	2	1	1	2	0.5	1.25	1.08155	0.378197	0.611457	-9.41486	0	-0.321928	0	Common	Ubc
P62983	1	1	2	1	1	2	0.5	1.25	1.08155	0.378197	0.611457	-9.41486	0	-0.321928	0	Common	Rps27a
P0CG49	1	1	2	1	1	2	0.5	1.25	1.08155	0.378197	0.611457	-9.41486	0	-0.321928	0	Common	Ubb
P12382	0	0	0	0	2	2	0	0	0	1	1	-10.0919	0	-1.58496	-1.58496	Common	Pfkl
O08917	1	1	1	1	0	0	0	1	0	1	1	-10.0919	0	1	1	Common	Flot1
Q9CYR0	0	0	0	0	2	2	0	0	0	1	1	-10.0919	0	-1.58496	-1.58496	Common	Ssbp1
P56399	1	0	0	0	3	3	-0.5	0.25	-1.08155	0.378197	0.611457	-9.41486	0	-1.41504	-2	Common	Usp5
P62849	2	3	5	3	4	2	1.5	3.25	1.45115	0.266422	0.611457	-9.02004	1	-0.192645	0.321928	Common	Rps24
Q9WTI7	0	1	0	0	4	2	-0.5	0.25	-1.08155	0.378197	0.611457	-9.41486	0	-1.41504	-2	Common	Myo1c
O88783	0	0	3	0	0	0	1.5	0.75	1.08163	0.378165	0.611457	-9.41477	0	0	1.32193	Common	F5
Q811S7	1	2	1	1	0	0	-0.5	1.25	-1.08155	0.378197	0.611457	-9.41486	0	1.32193	1	Common	Ubp1
Q80UG5	0	1	0	1	4	2	1.11022e-16	0.5	1.69821e-16	1	1	-10.0919	0	-1.41504	-1.41504	Common	2025-09-09
Q91VE6	1	1	1	1	0	0	0	1	0	1	1	-10.0919	0	1	1	Common	Nifk
Q3V3R1	0	0	0	0	3	3	0	0	0	1	1	-10.0919	0	-2	-2	Common	Mthfd1l
P28656	2	1	1	1	2	1	-0.5	1.25	-1.08155	0.378197	0.611457	-9.41486	0	0	-0.321928	Common	Nap1l1
Q16695	1	2	2	3	3	4	1	2	1.52961	0.247912	0.611457	-8.93443	1	-0.847997	-0.36257	Common	HIST3H3
P84233	1	2	2	3	3	4	1	2	1.52961	0.247912	0.611457	-8.93443	1	-0.847997	-0.36257	Common	Histone
P84244	1	2	2	3	3	4	1	2	1.52961	0.247912	0.611457	-8.93443	1	-0.847997	-0.36257	Common	H3f3a
Q6LBE8	1	2	2	3	3	4	1	2	1.52961	0.247912	0.611457	-8.93443	1	-0.847997	-0.36257	Common	H312
P02301	1	2	2	3	3	4	1	2	1.52961	0.247912	0.611457	-8.93443	1	-0.847997	-0.36257	Common	H3f3c
P59169	1	2	2	3	3	4	1	2	1.52961	0.247912	0.611457	-8.93443	1	-0.847997	-0.36257	Common	HTR4
P84228	1	2	2	3	3	4	1	2	1.52961	0.247912	0.611457	-8.93443	1	-0.847997	-0.36257	Common	Hist1h3b
P68433	1	2	2	3	3	4	1	2	1.52961	0.247912	0.611457	-8.93443	1	-0.847997	-0.36257	Common	Hist1h3a
P68431	1	2	2	3	3	4	1	2	1.52961	0.247912	0.611457	-8.93443	1	-0.847997	-0.36257	Common	HIST1H3A
Q71DI3	1	2	2	3	3	4	1	2	1.52961	0.247912	0.611457	-8.93443	1	-0.847997	-0.36257	Common	HIST2H3A
Q6LBF0	1	2	2	3	3	4	1	2	1.52961	0.247912	0.611457	-8.93443	1	-0.847997	-0.36257	Common	H3110
P26231	0	1	2	0	3	4	0.5	0.75	0.483718	0.670134	0.968868	-9.9327	0	-1.58496	-1.16993	Common	Ctnna1
Q61081	0	1	1	1	2	1	0.5	0.75	1.08155	0.378197	0.611457	-9.41486	0	-0.736966	-0.321928	Common	Cdc37
Q8BP71	1	1	1	0	1	1	-0.5	0.75	-1.08155	0.378197	0.611457	-9.41486	0	0	-0.415037	Common	Rbfox2
Q9Z1Z2	1	0	1	2	1	1	1	1	1.52961	0.247912	0.611457	-8.93443	1	-0.415037	0.321928	Common	Strap
Q9JIX8	2	1	0	1	1	1	-1	1	-1.52961	0.247912	0.611457	-8.93443	1	0.321928	-0.415037	Common	Acin1
Q9DAW9	1	1	1	0	2	2	-0.5	0.75	-1.08155	0.378197	0.611457	-9.41486	0	-0.584963	-1	Common	Cnn3
O70305	1	0	0	0	0	1	-0.5	0.25	-1.08155	0.378197	0.611457	-9.41486	0	0	-0.584963	Common	Atxn2
Q6PE01	1	1	1	2	1	1	0.5	1.25	1.08155	0.378197	0.611457	-9.41486	0	0	0.321928	Common	Snrnp40
P35441	1	2	3	1	2	1	0.5	1.75	0.483718	0.670134	0.968868	-9.9327	0	0	0.263034	Common	Thbs1
Q99MR6	1	0	1	1	0	0	0.5	0.75	1.08155	0.378197	0.611457	-9.41486	0	0.584963	1	Common	Srrt
O08749	0	0	0	0	3	2	0	0	0	1	1	-10.0919	0	-1.80735	-1.80735	Common	Dld
O54941	1	1	2	0	2	2	0	1	0	1	1	-10.0919	0	-0.584963	-0.584963	Common	Smarce1
E9Q557	0	0	0	2	0	2	1	0.5	1.08162	0.37817	0.611457	-9.41479	0	-1	0	Common	Dsp
Q6A065	1	0	2	0	2	2	0.5	0.75	0.483718	0.670134	0.968868	-9.9327	0	-1	-0.584963	Common	Cep170
Q8R1A4	0	0	0	0	3	3	0	0	0	1	1	-10.0919	0	-2	-2	Common	Dock7
Q9Z0H1	0	0	2	0	0	0	1	0.5	1.08162	0.37817	0.611457	-9.41479	0	0	1	Common	Wdr46
P67984	3	2	3	2	2	2	-3.70074e-17	2.5	-5.66069e-17	1	1	-10.0919	0	0.222392	0.222392	Common	Rpl22
P52293	0	0	1	0	1	2	0.5	0.25	1.08155	0.378197	0.611457	-9.41486	0	-1.32193	-0.736966	Common	Kpna2
P62843	1	1	1	0	1	0	-0.5	0.75	-1.08155	0.378197	0.611457	-9.41486	0	0.415037	0	Common	Rps15
P62846	1	1	1	0	1	0	-0.5	0.75	-1.08155	0.378197	0.611457	-9.41486	0	0.415037	0	Common	RPS15
Q9CQ48	0	0	0	0	2	1	0	0	0	1	1	-10.0919	0	-1.32193	-1.32193	Common	Nudcd2
Q9DCD2	0	2	1	0	0	0	-0.5	0.75	-0.483718	0.670134	0.968868	-9.9327	0	1	0.584963	Common	Xab2
Q28496	2	5	2	3	0	0	-1	3	-0.684087	0.555417	0.855707	-9.7874	0	2.16993	1.80735	Common	HBE1
Q6ZWY3	5	4	7	5	5	6	1.5	5.25	1.45115	0.266422	0.611457	-9.02004	1	-0.241008	0.106915	Common	Rps27l
Q6NS46	1	0	3	0	0	0	1	1	0.684087	0.555417	0.855707	-9.7874	0	0.584963	1.32193	Common	Pdcd11
Q8BKC5	0	0	0	0	2	1	0	0	0	1	1	-10.0919	0	-1.32193	-1.32193	Common	Ipo5
Q6ZWU9	5	5	7	5	5	5	1	5.5	1.08162	0.37817	0.611457	-9.41479	0	0	0.222392	Common	Rps27
Q9DCH4	0	0	0	0	3	1	0	0	0	1	1	-10.0919	0	-1.58496	-1.58496	Common	Eif3f
Q08093	0	1	1	0	2	1	1.11022e-16	0.5	1.69821e-16	1	1	-10.0919	0	-0.736966	-0.736966	Common	Cnn2
Q80X50	1	2	1	0	1	0	-1	1	-1.52961	0.247912	0.611457	-8.93443	1	0.736966	0	Common	Ubap2l
P10711	1	1	1	2	1	1	0.5	1.25	1.08155	0.378197	0.611457	-9.41486	0	0	0.321928	Common	Tcea1
Q6NVF9	2	2	2	1	1	1	-0.5	1.75	-1.08155	0.378197	0.611457	-9.41486	0	0.584963	0.321928	Common	Cpsf6
O70503	0	0	0	0	3	2	0	0	0	1	1	-10.0919	0	-1.80735	-1.80735	Common	Hsd17b12
P62889	1	1	0	2	0	0	0	1	0	1	1	-10.0919	0	1	1	Common	Rpl30
P30999	2	1	1	0	3	1	-1	1	-1.52961	0.247912	0.611457	-8.93443	1	-0.263034	-1	Common	Ctnnd1
O35639	0	0	0	0	2	1	0	0	0	1	1	-10.0919	0	-1.32193	-1.32193	Common	Anxa3
Q02395	1	1	1	0	0	0	-0.5	0.75	-1.08155	0.378197	0.611457	-9.41486	0	1	0.584963	Common	Mtf2
Q9Z130	1	2	0	1	1	1	-1	1	-1.52961	0.247912	0.611457	-8.93443	1	0.321928	-0.415037	Common	Hnrnpdl
P55737	1	0	0	0	3	3	-0.5	0.25	-1.08155	0.378197	0.611457	-9.41486	0	-1.41504	-2	Common	HSP90-2
P51818	1	0	0	0	3	3	-0.5	0.25	-1.08155	0.378197	0.611457	-9.41486	0	-1.41504	-2	Common	HSP90-3
O03986	1	0	0	0	3	3	-0.5	0.25	-1.08155	0.378197	0.611457	-9.41486	0	-1.41504	-2	Common	HSP90-4
Q920B9	1	1	2	1	0	0	0.5	1.25	1.08155	0.378197	0.611457	-9.41486	0	1	1.32193	Common	Supt16h
P17918	1	0	0	0	2	3	-0.5	0.25	-1.08155	0.378197	0.611457	-9.41486	0	-1.22239	-1.80735	Common	Pcna
Q9CY58	3	1	3	2	2	1	0.5	2.25	0.483718	0.670134	0.968868	-9.9327	0	0.263034	0.485427	Common	Serbp1
Q61702	1	2	1	2	0	0	1.11022e-16	1.5	1.69821e-16	1	1	-10.0919	0	1.32193	1.32193	Common	Itih1
Q99P88	1	0	0	0	1	2	-0.5	0.25	-1.08155	0.378197	0.611457	-9.41486	0	-0.736966	-1.32193	Common	Nup155
Q99LC2	1	1	3	1	0	0	1	1.5	1.08162	0.37817	0.611457	-9.41479	0	1	1.58496	Common	Cstf1
Q9DBY8	0	0	0	0	1	2	0	0	0	1	1	-10.0919	0	-1.32193	-1.32193	Common	Nvl
P62821	0	0	1	0	2	3	0.5	0.25	1.08155	0.378197	0.611457	-9.41486	0	-1.80735	-1.22239	Common	Rab1A
P63242	1	0	1	2	3	3	1	1	1.52961	0.247912	0.611457	-8.93443	1	-1.41504	-0.678072	Common	Eif5a
Q08642	1	0	0	0	1	2	-0.5	0.25	-1.08155	0.378197	0.611457	-9.41486	0	-0.736966	-1.32193	Common	Padi2
Q8CGC6	0	0	2	0	0	0	1	0.5	1.08162	0.37817	0.611457	-9.41479	0	0	1	Common	Rbm28
P24270	0	0	0	0	3	2	0	0	0	1	1	-10.0919	0	-1.80735	-1.80735	Common	Cat
Q61703	1	0	0	1	0	0	0	0.5	0	1	1	-10.0919	0	0.584963	0.584963	Common	Itih2
Q3U1J4	0	0	0	1	2	1	0.5	0.25	1.08155	0.378197	0.611457	-9.41486	0	-1.32193	-0.736966	Common	Ddb1
Q922Q8	1	1	1	1	0	2	0	1	0	1	1	-10.0919	0	0	0	Common	Lrrc59
Q8K019	2	3	2	2	1	0	-0.5	2.25	-1.08155	0.378197	0.611457	-9.41486	0	1.22239	1	Common	Bclaf1
Q9QZE5	0	0	0	0	2	2	0	0	0	1	1	-10.0919	0	-1.58496	-1.58496	Common	Copg1
P50247	0	0	0	0	3	3	0	0	0	1	1	-10.0919	0	-2	-2	Common	Ahcy
Q8BWT1	0	0	0	0	3	3	0	0	0	1	1	-10.0919	0	-2	-2	Common	Acaa2
P43275	1	1	2	1	0	0	0.5	1.25	1.08155	0.378197	0.611457	-9.41486	0	1	1.32193	Common	Hist1h1a
Q64521	0	0	0	0	2	1	0	0	0	1	1	-10.0919	0	-1.32193	-1.32193	Common	Gpd2
Q91VJ5	1	1	2	1	0	0	0.5	1.25	1.08155	0.378197	0.611457	-9.41486	0	1	1.32193	Common	Pqbp1
P14923	0	1	0	1	2	2	1.11022e-16	0.5	1.69821e-16	1	1	-10.0919	0	-1	-1	Common	JUP
Q02257	0	1	0	1	2	2	1.11022e-16	0.5	1.69821e-16	1	1	-10.0919	0	-1	-1	Common	Jup
Q61316	0	1	0	0	2	1	-0.5	0.25	-1.08155	0.378197	0.611457	-9.41486	0	-0.736966	-1.32193	Common	Hspa4
Q00612	0	0	0	0	2	2	0	0	0	1	1	-10.0919	0	-1.58496	-1.58496	Common	G6pdx
P16045	3	4	4	2	4	5	-0.5	3.25	-0.483718	0.670134	0.968868	-9.9327	0	-0.289507	-0.459432	Common	Lgals1
P62858	2	2	3	2	3	3	0.5	2.25	1.08155	0.378197	0.611457	-9.41486	0	-0.415037	-0.192645	Common	Rps28
Q9DBG3	0	0	0	0	1	2	0	0	0	1	1	-10.0919	0	-1.32193	-1.32193	Common	Ap2b1
Q8BH74	0	0	0	0	1	1	0	0	0	1	1	-10.0919	0	-1	-1	Common	Nup107
Q9EPU4	0	1	1	0	0	0	1.11022e-16	0.5	1.69821e-16	1	1	-10.0919	0	0.584963	0.584963	Common	Cpsf1
Q8BHD7	1	1	1	0	0	1	-0.5	0.75	-1.08155	0.378197	0.611457	-9.41486	0	0.415037	0	Common	Ptbp3
Q61136	0	1	0	0	1	1	-0.5	0.25	-1.08155	0.378197	0.611457	-9.41486	0	-0.415037	-1	Common	Prpf4b
Q8BH64	0	0	0	0	1	2	0	0	0	1	1	-10.0919	0	-1.32193	-1.32193	Common	Ehd2
P17426	0	0	0	0	2	1	0	0	0	1	1	-10.0919	0	-1.32193	-1.32193	Common	Ap2a1
Q07076	0	0	0	0	2	2	0	0	0	1	1	-10.0919	0	-1.58496	-1.58496	Common	Anxa7
O54774	0	0	0	0	1	0	0	0	0	1	1	-10.0919	0	-0.584963	-0.584963	Common	Ap3d1
Q6NV83	1	2	1	1	1	1	-0.5	1.25	-1.08155	0.378197	0.611457	-9.41486	0	0.321928	0	Common	U2surp
Q8BMK4	0	0	1	0	3	2	0.5	0.25	1.08155	0.378197	0.611457	-9.41486	0	-1.80735	-1.22239	Common	Ckap4
Q9EP71	1	0	0	0	1	2	-0.5	0.25	-1.08155	0.378197	0.611457	-9.41486	0	-0.736966	-1.32193	Common	Rai14
Q61553	0	0	2	0	1	1	1	0.5	1.08162	0.37817	0.611457	-9.41479	0	-1	0	Common	Fscn1
P62774	1	1	1	0	1	1	-0.5	0.75	-1.08155	0.378197	0.611457	-9.41486	0	0	-0.415037	Common	Mtpn
P84078	1	1	0	1	2	3	-0.5	0.75	-1.08155	0.378197	0.611457	-9.41486	0	-0.807355	-1.22239	Common	Arf1
Q8BSL7	1	1	0	1	2	3	-0.5	0.75	-1.08155	0.378197	0.611457	-9.41486	0	-0.807355	-1.22239	Common	Arf2
P61205	1	1	0	1	2	3	-0.5	0.75	-1.08155	0.378197	0.611457	-9.41486	0	-0.807355	-1.22239	Common	Arf3
P23249	0	0	1	0	3	0	0.5	0.25	1.08155	0.378197	0.611457	-9.41486	0	-1.32193	-0.736966	Common	Mov10
Q8BP67	1	2	2	2	1	0	0.5	1.75	1.08155	0.378197	0.611457	-9.41486	0	0.736966	1	Common	Rpl24
Q3TJD7	1	1	2	1	2	1	0.5	1.25	1.08155	0.378197	0.611457	-9.41486	0	-0.321928	0	Common	Pdlim7
Q9WUN2	0	1	0	0	1	1	-0.5	0.25	-1.08155	0.378197	0.611457	-9.41486	0	-0.415037	-1	Common	Tbk1
Q9Z0U1	0	0	0	0	1	1	0	0	0	1	1	-10.0919	0	-1	-1	Common	Tjp2
P97379	0	0	0	1	1	1	0.5	0.25	1.08155	0.378197	0.611457	-9.41486	0	-1	-0.415037	Common	G3bp2
Q3THK7	0	1	0	1	1	1	1.11022e-16	0.5	1.69821e-16	1	1	-10.0919	0	-0.415037	-0.415037	Common	Gmps
P10922	1	1	1	0	0	0	-0.5	0.75	-1.08155	0.378197	0.611457	-9.41486	0	1	0.584963	Common	H1f0
P13864	1	0	0	1	0	1	0	0.5	0	1	1	-10.0919	0	0	0	Common	Dnmt1
P53994	0	0	0	0	2	0	0	0	0	1	1	-10.0919	0	-1	-1	Common	Rab2a
Q99LE6	1	1	2	0	2	2	0	1	0	1	1	-10.0919	0	-0.584963	-0.584963	Common	Abcf2
Q9DCF9	0	0	1	0	1	1	0.5	0.25	1.08155	0.378197	0.611457	-9.41486	0	-1	-0.415037	Common	Ssr3
Q9CQV8	1	0	0	1	1	1	0	0.5	0	1	1	-10.0919	0	-0.415037	-0.415037	Common	Ywhab
P58137	0	0	0	0	0	4	0	0	0	1	1	-10.0919	0	-1.58496	-1.58496	Common	Acot8
Q9D6T0	1	1	1	0	0	0	-0.5	0.75	-1.08155	0.378197	0.611457	-9.41486	0	1	0.584963	Common	Nosip
P46425	0	0	2	0	2	3	1	0.5	1.08162	0.37817	0.611457	-9.41479	0	-1.80735	-0.807355	Common	Gstp2
P19157	0	0	2	0	2	3	1	0.5	1.08162	0.37817	0.611457	-9.41479	0	-1.80735	-0.807355	Common	Gstp1
O08579	0	0	0	0	1	1	0	0	0	1	1	-10.0919	0	-1	-1	Common	Emd
P81795	1	1	1	1	1	1	0	1	0	1	1	-10.0919	0	0	0	Common	Eif2s3
Q9Z0N2	1	1	1	1	1	1	0	1	0	1	1	-10.0919	0	0	0	Common	Eif2s3y
Q9Z0N1	1	1	1	1	1	1	0	1	0	1	1	-10.0919	0	0	0	Common	Eif2s3x
C9WPN6	1	1	1	1	1	1	0	1	0	1	1	-10.0919	0	0	0	Common	Eif2s3y
Q2VIR3	1	1	1	1	1	1	0	1	0	1	1	-10.0919	0	0	0	Common	EIF2S3B
P41091	1	1	1	1	1	1	0	1	0	1	1	-10.0919	0	0	0	Common	EIF2S3
Q61704	1	1	0	1	0	0	-0.5	0.75	-1.08155	0.378197	0.611457	-9.41486	0	1	0.584963	Common	Itih3
O35286	0	0	3	1	1	0	2	1	2.16324	0.144236	0.529847	-8.25733	1	-0.584963	1	Common	Dhx15
Q8BUK6	0	0	0	0	1	1	0	0	0	1	1	-10.0919	0	-1	-1	Common	Hook3
Q6P542	3	0	0	0	0	0	-1.5	0.75	-1.08163	0.378165	0.611457	-9.41477	0	1.32193	0	Common	Abcf1
P40336	0	0	0	0	2	1	0	0	0	1	1	-10.0919	0	-1.32193	-1.32193	Common	Vps26a
Q9EQ61	0	0	1	0	0	0	0.5	0.25	1.08155	0.378197	0.611457	-9.41486	0	0	0.584963	Common	Pes1
Q6A0A9	2	0	0	1	1	1	-0.5	0.75	-0.483718	0.670134	0.968868	-9.9327	0	0	-0.415037	Common	FAM120A
E9Q634	0	0	0	0	1	2	0	0	0	1	1	-10.0919	0	-1.32193	-1.32193	Common	Myo1e
O08585	0	0	0	0	1	1	0	0	0	1	1	-10.0919	0	-1	-1	Common	Clta
Q9QUR6	1	0	0	0	1	1	-0.5	0.25	-1.08155	0.378197	0.611457	-9.41486	0	-0.415037	-1	Common	Prep
Q05CL8	0	1	1	0	0	0	1.11022e-16	0.5	1.69821e-16	1	1	-10.0919	0	0.584963	0.584963	Common	Larp7
Q61464	0	1	1	0	0	0	1.11022e-16	0.5	1.69821e-16	1	1	-10.0919	0	0.584963	0.584963	Common	Znf638
Q61595	0	0	0	0	3	0	0	0	0	1	1	-10.0919	0	-1.32193	-1.32193	Common	Ktn1
P97355	0	0	0	0	1	1	0	0	0	1	1	-10.0919	0	-1	-1	Common	Sms
Q62241	1	1	1	1	0	1	0	1	0	1	1	-10.0919	0	0.415037	0.415037	Common	Snrpc
Q08288	1	1	1	1	1	1	0	1	0	1	1	-10.0919	0	0	0	Common	Lyar
Q5SF07	0	0	1	0	0	1	0.5	0.25	1.08155	0.378197	0.611457	-9.41486	0	-0.584963	0	Common	Igf2bp2
Q99JX4	1	0	0	0	1	1	-0.5	0.25	-1.08155	0.378197	0.611457	-9.41486	0	-0.415037	-1	Common	Eif3m
Q9D1J3	1	1	1	1	1	1	0	1	0	1	1	-10.0919	0	0	0	Common	Sarnp
Q9D1C9	0	1	1	0	0	0	1.11022e-16	0.5	1.69821e-16	1	1	-10.0919	0	0.584963	0.584963	Common	Rrp7a
Q91VH6	1	1	1	1	1	1	0	1	0	1	1	-10.0919	0	0	0	Common	Memo1
Q8CG48	0	0	1	0	2	1	0.5	0.25	1.08155	0.378197	0.611457	-9.41486	0	-1.32193	-0.736966	Common	Smc2
P47757	2	1	0	1	2	1	-1	1	-1.52961	0.247912	0.611457	-8.93443	1	0	-0.736966	Common	Capzb
P70168	1	0	1	0	1	1	1.4803e-16	0.5	2.26427e-16	1	1	-10.0919	0	-0.415037	-0.415037	Common	Kpnb1
Q6ZWN5	3	1	1	1	1	1	-1	1.5	-1.08162	0.37817	0.611457	-9.41479	0	0.584963	0	Common	Rps9
Q9DCR2	0	0	0	0	1	1	0	0	0	1	1	-10.0919	0	-1	-1	Common	Ap3s1
Q60930	0	0	1	0	2	1	0.5	0.25	1.08155	0.378197	0.611457	-9.41486	0	-1.32193	-0.736966	Common	Vdac2
Q99LI7	0	1	1	0	0	0	1.11022e-16	0.5	1.69821e-16	1	1	-10.0919	0	0.584963	0.584963	Common	Cstf3
E9PVA8	0	0	0	0	0	1	0	0	0	1	1	-10.0919	0	-0.584963	-0.584963	Common	Gcn1
Q8CGK3	0	0	0	0	2	1	0	0	0	1	1	-10.0919	0	-1.32193	-1.32193	Common	Lonp1
P08249	0	0	0	0	2	1	0	0	0	1	1	-10.0919	0	-1.32193	-1.32193	Common	Mdh2
O76031	0	0	0	0	2	2	0	0	0	1	1	-10.0919	0	-1.58496	-1.58496	Common	CLPX
Q9JHS4	0	0	0	0	2	2	0	0	0	1	1	-10.0919	0	-1.58496	-1.58496	Common	Clpx
P62915	1	1	1	0	0	0	-0.5	0.75	-1.08155	0.378197	0.611457	-9.41486	0	1	0.584963	Common	Gtf2b
Q91W59	1	1	1	1	1	1	0	1	0	1	1	-10.0919	0	0	0	Common	Rbms1
Q8BWL5	1	1	1	1	1	1	0	1	0	1	1	-10.0919	0	0	0	Common	Rbms3
Q9D883	2	2	1	3	0	0	0	2	0	1	1	-10.0919	0	1.58496	1.58496	Common	U2af1
P41105	0	0	2	0	0	0	1	0.5	1.08162	0.37817	0.611457	-9.41479	0	0	1	Common	Rpl28
Q8BHB4	0	0	1	0	0	0	0.5	0.25	1.08155	0.378197	0.611457	-9.41486	0	0	0.584963	Common	Wdr3
E9Q1P8	0	0	0	1	1	0	0.5	0.25	1.08155	0.378197	0.611457	-9.41486	0	-0.584963	0	Common	Irf2bp2
P26516	0	0	0	0	1	1	0	0	0	1	1	-10.0919	0	-1	-1	Common	Psmd7
Q8BGH2	0	0	0	0	1	1	0	0	0	1	1	-10.0919	0	-1	-1	Common	Samm50
Q8BGC4	0	0	0	0	1	0	0	0	0	1	1	-10.0919	0	-0.584963	-0.584963	Common	Zadh2
Q8VHZ7	0	0	1	0	0	1	0.5	0.25	1.08155	0.378197	0.611457	-9.41486	0	-0.584963	0	Common	Imp4
P63028	0	0	1	0	2	1	0.5	0.25	1.08155	0.378197	0.611457	-9.41486	0	-1.32193	-0.736966	Common	Tpt1
Q60749	3	3	4	2	3	1	0	3	0	1	1	-10.0919	0	0.415037	0.415037	Common	Khdrbs1
P63158	1	1	1	0	0	0	-0.5	0.75	-1.08155	0.378197	0.611457	-9.41486	0	1	0.584963	Common	Hmgb1
P09429	1	1	1	0	0	0	-0.5	0.75	-1.08155	0.378197	0.611457	-9.41486	0	1	0.584963	Common	HMGB1
Q8R010	0	0	0	0	0	1	0	0	0	1	1	-10.0919	0	-0.584963	-0.584963	Common	Aimp2
Q99LH1	0	0	1	0	0	0	0.5	0.25	1.08155	0.378197	0.611457	-9.41486	0	0	0.584963	Common	Gnl2
Q80VD1	1	2	1	0	0	0	-1	1	-1.52961	0.247912	0.611457	-8.93443	1	1.32193	0.584963	Common	Fam98b
P60670	1	0	0	0	0	1	-0.5	0.25	-1.08155	0.378197	0.611457	-9.41486	0	0	-0.584963	Common	Nploc4
Q64737	0	0	0	0	0	1	0	0	0	1	1	-10.0919	0	-0.584963	-0.584963	Common	Gart
Q9QYB5	0	0	0	0	1	1	0	0	0	1	1	-10.0919	0	-1	-1	Common	Add3
P62488	1	1	0	1	0	0	-0.5	0.75	-1.08155	0.378197	0.611457	-9.41486	0	1	0.584963	Common	Polr2g
Q9CRB2	1	0	1	0	0	0	1.4803e-16	0.5	2.26427e-16	1	1	-10.0919	0	0.584963	0.584963	Common	Nhp2
Q9DBJ1	0	0	1	0	1	1	0.5	0.25	1.08155	0.378197	0.611457	-9.41486	0	-1	-0.415037	Common	Pgam1
Q5SUF2	0	0	0	0	1	0	0	0	0	1	1	-10.0919	0	-0.584963	-0.584963	Common	Luc7l3
Q63570	0	0	0	0	1	1	0	0	0	1	1	-10.0919	0	-1	-1	Common	Psmc4
P54775	0	0	0	0	1	1	0	0	0	1	1	-10.0919	0	-1	-1	Common	Psmc4
E9QAT4	0	1	2	1	1	1	1	1	1.52961	0.247912	0.611457	-8.93443	1	-0.415037	0.321928	Common	Sec16a
Q9D0R8	1	0	0	0	1	0	-0.5	0.25	-1.08155	0.378197	0.611457	-9.41486	0	0	-0.584963	Common	Lsm12
Q924C1	0	0	0	0	2	0	0	0	0	1	1	-10.0919	0	-1	-1	Common	Xpo5
E9Q555	0	0	0	0	1	1	0	0	0	1	1	-10.0919	0	-1	-1	Common	Rnf213
Q60676	0	0	0	0	1	1	0	0	0	1	1	-10.0919	0	-1	-1	Common	Ppp5c
Q91YD6	0	0	0	1	1	1	0.5	0.25	1.08155	0.378197	0.611457	-9.41486	0	-1	-0.415037	Common	Vill
P35278	0	0	0	0	1	1	0	0	0	1	1	-10.0919	0	-1	-1	Common	Rab5c
Q921G8	0	0	0	0	2	3	0	0	0	1	1	-10.0919	0	-1.80735	-1.80735	Common	Tubgcp2
Q4VA53	1	1	1	1	1	1	0	1	0	1	1	-10.0919	0	0	0	Common	Pds5b
O09106	1	1	1	1	1	1	0	1	0	1	1	-10.0919	0	0	0	Common	Hdac1
P70288	1	1	1	1	1	1	0	1	0	1	1	-10.0919	0	0	0	Common	Hdac2
P70349	1	1	1	1	1	1	0	1	0	1	1	-10.0919	0	0	0	Common	Hint1
Q9EPC1	1	0	0	0	1	1	-0.5	0.25	-1.08155	0.378197	0.611457	-9.41486	0	-0.415037	-1	Common	Parva
P32233	0	1	1	0	0	0	1.11022e-16	0.5	1.69821e-16	1	1	-10.0919	0	0.584963	0.584963	Common	Drg1
P48747	0	0	1	0	0	0	0.5	0.25	1.08155	0.378197	0.611457	-9.41486	0	0	0.584963	Common	C9
Q99497	0	0	1	0	1	0	0.5	0.25	1.08155	0.378197	0.611457	-9.41486	0	-0.584963	0	Common	PARK7
Q99LX0	0	0	1	0	1	0	0.5	0.25	1.08155	0.378197	0.611457	-9.41486	0	-0.584963	0	Common	Park7
Q9QUI0	0	1	0	0	0	0	-0.5	0.25	-1.08155	0.378197	0.611457	-9.41486	0	0.584963	0	Common	Rhoa
Q62159	0	1	0	0	0	0	-0.5	0.25	-1.08155	0.378197	0.611457	-9.41486	0	0.584963	0	Common	Rhoc
P62746	0	1	0	0	0	0	-0.5	0.25	-1.08155	0.378197	0.611457	-9.41486	0	0.584963	0	Common	Rhob
Q6PFD9	0	0	0	0	1	0	0	0	0	1	1	-10.0919	0	-0.584963	-0.584963	Common	Nup98
P27546	2	0	0	0	0	0	-1	0.5	-1.08162	0.37817	0.611457	-9.41479	0	1	0	Common	Map4
Q32MW3	0	1	0	0	1	1	-0.5	0.25	-1.08155	0.378197	0.611457	-9.41486	0	-0.415037	-1	Common	Acot10
Q9R0X4	0	1	0	0	1	1	-0.5	0.25	-1.08155	0.378197	0.611457	-9.41486	0	-0.415037	-1	Common	Acot9
Q91YR7	1	1	1	0	0	0	-0.5	0.75	-1.08155	0.378197	0.611457	-9.41486	0	1	0.584963	Common	Prpf6
Q9D287	2	2	2	0	0	1	-1	1.5	-1.08162	0.37817	0.611457	-9.41479	0	1	0.415037	Common	Bcas2
Q8CGZ0	0	0	1	0	0	0	0.5	0.25	1.08155	0.378197	0.611457	-9.41486	0	0	0.584963	Common	Cherp
Q8CGE8	1	1	1	0	1	0	-0.5	0.75	-1.08155	0.378197	0.611457	-9.41486	0	0.415037	0	Common	Ifi205a
P0DOV1	1	1	1	0	1	0	-0.5	0.75	-1.08155	0.378197	0.611457	-9.41486	0	0.415037	0	Common	Mnda
Q8BFR5	0	0	0	0	1	0	0	0	0	1	1	-10.0919	0	-0.584963	-0.584963	Common	Tufm
P97807	0	0	0	0	1	1	0	0	0	1	1	-10.0919	0	-1	-1	Common	Fh
P51125	0	0	0	0	1	0	0	0	0	1	1	-10.0919	0	-0.584963	-0.584963	Common	Cast
P04186	1	1	1	0	0	0	-0.5	0.75	-1.08155	0.378197	0.611457	-9.41486	0	1	0.584963	Common	Cfb
Q99KI0	0	0	0	0	0	2	0	0	0	1	1	-10.0919	0	-1	-1	Common	Aco2
O70591	0	0	0	0	1	0	0	0	0	1	1	-10.0919	0	-0.584963	-0.584963	Common	Pfdn2
Q9WUM4	0	0	0	0	2	1	0	0	0	1	1	-10.0919	0	-1.32193	-1.32193	Common	Coro1c
P61957	1	0	1	1	0	1	0.5	0.75	1.08155	0.378197	0.611457	-9.41486	0	0	0.415037	Common	Sumo2
Q9Z172	1	0	1	1	0	1	0.5	0.75	1.08155	0.378197	0.611457	-9.41486	0	0	0.415037	Common	Sumo3
O55142	1	2	2	1	1	0	1.11022e-16	1.5	1.69821e-16	1	1	-10.0919	0	0.736966	0.736966	Common	Rpl35a
P24527	0	0	0	0	1	1	0	0	0	1	1	-10.0919	0	-1	-1	Common	Lta4h
Q9JLQ0	0	0	0	0	1	1	0	0	0	1	1	-10.0919	0	-1	-1	Common	Cd2ap
Q3TKT4	0	0	0	0	1	2	0	0	0	1	1	-10.0919	0	-1.32193	-1.32193	Common	Smarca4
Q8WN70	0	0	0	0	0	1	0	0	0	1	1	-10.0919	0	-0.584963	-0.584963	Common	BABAM2
Q8K3W0	0	0	0	0	0	1	0	0	0	1	1	-10.0919	0	-0.584963	-0.584963	Common	Babam2
Q8WN69	0	0	0	0	0	1	0	0	0	1	1	-10.0919	0	-0.584963	-0.584963	Common	BABAM2
Q6SP92	0	0	0	0	0	1	0	0	0	1	1	-10.0919	0	-0.584963	-0.584963	Common	Babam2
O35841	0	0	0	1	1	0	0.5	0.25	1.08155	0.378197	0.611457	-9.41486	0	-0.584963	0	Common	Api5
Q61171	0	0	0	0	2	1	0	0	0	1	1	-10.0919	0	-1.32193	-1.32193	Common	Prdx2
Q61466	0	0	0	0	0	1	0	0	0	1	1	-10.0919	0	-0.584963	-0.584963	Common	Smarcd1
Q99JR8	0	0	0	0	0	1	0	0	0	1	1	-10.0919	0	-0.584963	-0.584963	Common	Smarcd2
Q6P9Z1	0	0	0	0	0	1	0	0	0	1	1	-10.0919	0	-0.584963	-0.584963	Common	Smarcd3
Q9JJ80	0	0	2	0	0	0	1	0.5	1.08162	0.37817	0.611457	-9.41479	0	0	1	Common	Rpf2
Q91VR5	1	0	3	0	1	0	1	1	0.684087	0.555417	0.855707	-9.7874	0	0	0.736966	Common	Ddx1
Q62351	0	0	0	0	1	1	0	0	0	1	1	-10.0919	0	-1	-1	Common	Tfrc
Q9CXS4	0	1	1	0	0	0	1.11022e-16	0.5	1.69821e-16	1	1	-10.0919	0	0.584963	0.584963	Common	Cenpv
Q8BZX4	0	0	1	0	0	0	0.5	0.25	1.08155	0.378197	0.611457	-9.41486	0	0	0.584963	Common	Srek1
Q9QXS6	0	0	0	0	1	1	0	0	0	1	1	-10.0919	0	-1	-1	Common	Dbn1
Q9WUR2	0	0	0	0	0	2	0	0	0	1	1	-10.0919	0	-1	-1	Common	Eci2
Q01405	1	0	0	0	1	1	-0.5	0.25	-1.08155	0.378197	0.611457	-9.41486	0	-0.415037	-1	Common	Sec23a
Q9D662	1	0	0	0	1	1	-0.5	0.25	-1.08155	0.378197	0.611457	-9.41486	0	-0.415037	-1	Common	Sec23b
Q8CDN6	0	0	1	0	1	1	0.5	0.25	1.08155	0.378197	0.611457	-9.41486	0	-1	-0.415037	Common	Txnl1
O35640	0	0	0	0	1	1	0	0	0	1	1	-10.0919	0	-1	-1	Common	Anxa8
Q8CGC4	0	0	0	0	1	1	0	0	0	1	1	-10.0919	0	-1	-1	Common	Lsm14b
Q61655	1	0	0	0	1	1	-0.5	0.25	-1.08155	0.378197	0.611457	-9.41486	0	-0.415037	-1	Common	Ddx19a
P28659	1	1	1	0	0	0	-0.5	0.75	-1.08155	0.378197	0.611457	-9.41486	0	1	0.584963	Common	Celf1
P30416	0	0	0	0	1	1	0	0	0	1	1	-10.0919	0	-1	-1	Common	Fkbp4
Q8BHS3	0	1	0	0	0	0	-0.5	0.25	-1.08155	0.378197	0.611457	-9.41486	0	0.584963	0	Common	Rbm22
Q91ZW3	1	0	0	0	0	0	-0.5	0.25	-1.08155	0.378197	0.611457	-9.41486	0	0.584963	0	Common	Smarca5
Q8BG32	0	0	0	0	2	2	0	0	0	1	1	-10.0919	0	-1.58496	-1.58496	Common	Psmd11
P20761	0	1	1	2	3	1	1	1	1.52961	0.247912	0.611457	-8.93443	1	-1	-0.263034	Common	Igh-1a
Q810B6	0	0	0	0	1	1	0	0	0	1	1	-10.0919	0	-1	-1	Common	Ankfy1
Q61147	1	0	1	3	0	0	1.5	1.25	1.45115	0.266422	0.611457	-9.02004	1	0.584963	1.58496	Common	Cp
P63005	1	0	1	0	1	1	1.4803e-16	0.5	2.26427e-16	1	1	-10.0919	0	-0.415037	-0.415037	Common	Pafah1b1
Q9R1P1	1	1	1	0	1	1	-0.5	0.75	-1.08155	0.378197	0.611457	-9.41486	0	0	-0.415037	Common	Psmb3
P27612	0	1	0	0	1	1	-0.5	0.25	-1.08155	0.378197	0.611457	-9.41486	0	-0.415037	-1	Common	Plaa
P54319	0	1	0	0	1	1	-0.5	0.25	-1.08155	0.378197	0.611457	-9.41486	0	-0.415037	-1	Common	Plaa
P28867	0	0	0	0	1	1	0	0	0	1	1	-10.0919	0	-1	-1	Common	Prkcd
P62320	1	0	1	2	1	1	1	1	1.52961	0.247912	0.611457	-8.93443	1	-0.415037	0.321928	Common	Snrpd3
O70475	0	0	0	0	1	0	0	0	0	1	1	-10.0919	0	-0.584963	-0.584963	Common	Ugdh
O60701	0	0	0	0	1	0	0	0	0	1	1	-10.0919	0	-0.584963	-0.584963	Common	UGDH
Q7TMI3	1	0	0	0	0	0	-0.5	0.25	-1.08155	0.378197	0.611457	-9.41486	0	0.584963	0	Common	Uhrf2
P49025	0	0	0	0	0	1	0	0	0	1	1	-10.0919	0	-0.584963	-0.584963	Common	Cit
P62830	0	1	1	0	1	1	1.11022e-16	0.5	1.69821e-16	1	1	-10.0919	0	-0.415037	-0.415037	Common	Rpl23
Q3UPF5	1	0	1	0	1	1	1.4803e-16	0.5	2.26427e-16	1	1	-10.0919	0	-0.415037	-0.415037	Common	Zc3hav1
P56960	0	0	0	0	1	0	0	0	0	1	1	-10.0919	0	-0.584963	-0.584963	Common	Exosc10
P18525	0	0	0	0	0	1	0	0	0	1	1	-10.0919	0	-0.584963	-0.584963	Common	Ig
P01806	0	0	0	0	0	1	0	0	0	1	1	-10.0919	0	-0.584963	-0.584963	Common	Ig
P01808	0	0	0	0	0	1	0	0	0	1	1	-10.0919	0	-0.584963	-0.584963	Common	Ig
P01807	0	0	0	0	0	1	0	0	0	1	1	-10.0919	0	-0.584963	-0.584963	Common	Ig
P01810	0	0	0	0	0	1	0	0	0	1	1	-10.0919	0	-0.584963	-0.584963	Common	Ig
P01811	0	0	0	0	0	1	0	0	0	1	1	-10.0919	0	-0.584963	-0.584963	Common	Ig
Q0P678	1	1	1	0	0	0	-0.5	0.75	-1.08155	0.378197	0.611457	-9.41486	0	1	0.584963	Common	Zc3h18
Q99K51	0	0	0	0	1	1	0	0	0	1	1	-10.0919	0	-1	-1	Common	Pls3
Q61233	0	0	0	0	1	1	0	0	0	1	1	-10.0919	0	-1	-1	Common	Lcp1
Q9R1P4	1	0	0	0	1	0	-0.5	0.25	-1.08155	0.378197	0.611457	-9.41486	0	0	-0.584963	Common	Psma1
O54692	0	0	0	0	0	1	0	0	0	1	1	-10.0919	0	-0.584963	-0.584963	Common	Zw10
F8VPU2	0	0	0	0	1	1	0	0	0	1	1	-10.0919	0	-1	-1	Common	Farp1
P47740	0	0	0	0	1	0	0	0	0	1	1	-10.0919	0	-0.584963	-0.584963	Common	Aldh3a2
Q922J9	0	0	0	0	1	1	0	0	0	1	1	-10.0919	0	-1	-1	Common	Far1
O35593	0	0	0	0	1	0	0	0	0	1	1	-10.0919	0	-0.584963	-0.584963	Common	Psmd14
Q9LT08	0	0	0	0	1	0	0	0	0	1	1	-10.0919	0	-0.584963	-0.584963	Common	RPN11
P97429	0	0	0	0	2	0	0	0	0	1	1	-10.0919	0	-1	-1	Common	Anxa4
P97496	1	0	2	1	1	1	1	1	1.52961	0.247912	0.611457	-8.93443	1	-0.415037	0.321928	Common	Smarcc1
Q99L48	1	1	1	0	0	0	-0.5	0.75	-1.08155	0.378197	0.611457	-9.41486	0	1	0.584963	Common	Nmd3
Q02248	0	0	0	0	2	2	0	0	0	1	1	-10.0919	0	-1.58496	-1.58496	Common	Ctnnb1
P35222	0	0	0	0	2	2	0	0	0	1	1	-10.0919	0	-1.58496	-1.58496	Common	CTNNB1
P55937	0	0	0	0	1	1	0	0	0	1	1	-10.0919	0	-1	-1	Common	Golga3
Q9CQH7	0	1	0	0	0	0	-0.5	0.25	-1.08155	0.378197	0.611457	-9.41486	0	0.584963	0	Common	Btf3l4
Q8BX17	0	0	0	0	0	1	0	0	0	1	1	-10.0919	0	-0.584963	-0.584963	Common	Gemin5
Q8BL66	0	0	0	0	0	1	0	0	0	1	1	-10.0919	0	-0.584963	-0.584963	Common	Eea1
Q921C5	0	0	0	0	0	1	0	0	0	1	1	-10.0919	0	-0.584963	-0.584963	Common	Bicd2
Q6ZQL4	0	0	0	1	0	0	0.5	0.25	1.08155	0.378197	0.611457	-9.41486	0	0	0.584963	Common	Wdr43
Q9D8W5	0	0	0	0	2	1	0	0	0	1	1	-10.0919	0	-1.32193	-1.32193	Common	Psmd12
C0HKD9	0	1	0	0	0	0	-0.5	0.25	-1.08155	0.378197	0.611457	-9.41486	0	0.584963	0	Common	Mfap1b
C0HKD8	0	1	0	0	0	0	-0.5	0.25	-1.08155	0.378197	0.611457	-9.41486	0	0.584963	0	Common	Mfap1a
Q8CG47	0	0	1	0	1	1	0.5	0.25	1.08155	0.378197	0.611457	-9.41486	0	-1	-0.415037	Common	Smc4
Q9JJ28	0	1	0	0	0	0	-0.5	0.25	-1.08155	0.378197	0.611457	-9.41486	0	0.584963	0	Common	Flii
P50516	0	0	0	0	1	1	0	0	0	1	1	-10.0919	0	-1	-1	Common	Atp6v1a
P97384	0	1	1	1	0	0	0.5	0.75	1.08155	0.378197	0.611457	-9.41486	0	0.584963	1	Common	Anxa11
Q8BY71	1	0	1	1	0	0	0.5	0.75	1.08155	0.378197	0.611457	-9.41486	0	0.584963	1	Common	Hat1
Q8R2N2	0	0	0	0	0	1	0	0	0	1	1	-10.0919	0	-0.584963	-0.584963	Common	Utp4
Q8R0A0	0	0	1	0	0	0	0.5	0.25	1.08155	0.378197	0.611457	-9.41486	0	0	0.584963	Common	Gtf2f2
Q5D862	0	0	0	1	0	0	0.5	0.25	1.08155	0.378197	0.611457	-9.41486	0	0	0.584963	Common	FLG2
P39447	1	0	0	0	0	0	-0.5	0.25	-1.08155	0.378197	0.611457	-9.41486	0	0.584963	0	Common	Tjp1
O88532	1	0	0	0	1	0	-0.5	0.25	-1.08155	0.378197	0.611457	-9.41486	0	0	-0.584963	Common	Zfr
Q9D0T1	1	1	1	1	0	0	0	1	0	1	1	-10.0919	0	1	1	Common	Snu13
Q7TPM1	0	1	1	0	0	0	1.11022e-16	0.5	1.69821e-16	1	1	-10.0919	0	0.584963	0.584963	Common	Prrc2b
Q9Z2N8	0	0	0	1	0	0	0.5	0.25	1.08155	0.378197	0.611457	-9.41486	0	0	0.584963	Common	Actl6a
Q9WVJ2	0	0	0	0	1	1	0	0	0	1	1	-10.0919	0	-1	-1	Common	Psmd13
P08003	0	0	0	0	1	0	0	0	0	1	1	-10.0919	0	-0.584963	-0.584963	Common	Pdia4
Q03958	0	0	0	1	1	1	0.5	0.25	1.08155	0.378197	0.611457	-9.41486	0	-1	-0.415037	Common	Pfdn6
Q9QZQ1	0	0	0	0	1	0	0	0	0	1	1	-10.0919	0	-0.584963	-0.584963	Common	Afdn
O08582	0	0	0	0	0	1	0	0	0	1	1	-10.0919	0	-0.584963	-0.584963	Common	Gtpbp1
O00178	0	0	0	0	0	1	0	0	0	1	1	-10.0919	0	-0.584963	-0.584963	Common	GTPBP1
P17710	0	0	0	0	2	2	0	0	0	1	1	-10.0919	0	-1.58496	-1.58496	Common	Hk1
Q60737	0	0	1	0	1	1	0.5	0.25	1.08155	0.378197	0.611457	-9.41486	0	-1	-0.415037	Common	Csnk2a1
Q6PB66	0	0	0	0	1	0	0	0	0	1	1	-10.0919	0	-0.584963	-0.584963	Common	Lrpprc
P35486	0	0	0	0	2	1	0	0	0	1	1	-10.0919	0	-1.32193	-1.32193	Common	Pdha1
Q9JHU2	0	0	0	0	1	0	0	0	0	1	1	-10.0919	0	-0.584963	-0.584963	Common	Palmd
Q91YE6	0	0	0	0	0	1	0	0	0	1	1	-10.0919	0	-0.584963	-0.584963	Common	Ipo9
Q8R1S4	1	0	0	0	0	0	-0.5	0.25	-1.08155	0.378197	0.611457	-9.41486	0	0.584963	0	Common	Mtss1
Q62191	0	0	0	0	1	0	0	0	0	1	1	-10.0919	0	-0.584963	-0.584963	Common	Trim21
Q64133	0	0	0	0	0	1	0	0	0	1	1	-10.0919	0	-0.584963	-0.584963	Common	Maoa
Q99PP7	1	1	1	1	0	0	0	1	0	1	1	-10.0919	0	1	1	Common	Trim33
P84091	0	0	0	0	0	1	0	0	0	1	1	-10.0919	0	-0.584963	-0.584963	Common	Ap2m1
Q5U458	0	0	0	0	1	1	0	0	0	1	1	-10.0919	0	-1	-1	Common	Dnajc11
Q6ZQ08	0	0	0	0	0	1	0	0	0	1	1	-10.0919	0	-0.584963	-0.584963	Common	Cnot1
A5YKK6	0	0	0	0	0	1	0	0	0	1	1	-10.0919	0	-0.584963	-0.584963	Common	CNOT1
P62141	0	0	1	0	0	1	0.5	0.25	1.08155	0.378197	0.611457	-9.41486	0	-0.584963	0	Common	Ppp1cb
Q9ESX5	0	0	1	0	0	1	0.5	0.25	1.08155	0.378197	0.611457	-9.41486	0	-0.584963	0	Common	Dkc1
P01691	0	0	0	0	0	1	0	0	0	1	1	-10.0919	0	-0.584963	-0.584963	Common	Ig
Q9QYA2	0	0	0	0	0	1	0	0	0	1	1	-10.0919	0	-0.584963	-0.584963	Common	Tomm40
Q3TW96	0	0	0	0	1	1	0	0	0	1	1	-10.0919	0	-1	-1	Common	Uap1l1
P42125	0	0	0	0	1	0	0	0	0	1	1	-10.0919	0	-0.584963	-0.584963	Common	Eci1
Q99JF8	0	0	1	0	0	0	0.5	0.25	1.08155	0.378197	0.611457	-9.41486	0	0	0.584963	Common	Psip1
O55234	0	0	0	0	1	1	0	0	0	1	1	-10.0919	0	-1	-1	Common	Psmb5
Q60931	0	0	0	0	1	1	0	0	0	1	1	-10.0919	0	-1	-1	Common	Vdac3
P63163	1	0	0	0	0	0	-0.5	0.25	-1.08155	0.378197	0.611457	-9.41486	0	0.584963	0	Common	Snrpn
P27048	1	0	0	0	0	0	-0.5	0.25	-1.08155	0.378197	0.611457	-9.41486	0	0.584963	0	Common	Snrpb
Q921Y2	0	0	1	0	0	0	0.5	0.25	1.08155	0.378197	0.611457	-9.41486	0	0	0.584963	Common	Imp3
P34152	0	0	0	0	1	0	0	0	0	1	1	-10.0919	0	-0.584963	-0.584963	Common	Ptk2
Q8CEC0	0	0	0	0	1	1	0	0	0	1	1	-10.0919	0	-1	-1	Common	Nup88
E9PVX6	1	0	1	1	0	0	0.5	0.75	1.08155	0.378197	0.611457	-9.41486	0	0.584963	1	Common	Mki67
Q61495	0	0	0	1	0	0	0.5	0.25	1.08155	0.378197	0.611457	-9.41486	0	0	0.584963	Common	Dsg1a
P62743	0	0	0	0	1	0	0	0	0	1	1	-10.0919	0	-0.584963	-0.584963	Common	Ap2s1
P51480	0	0	0	0	0	1	0	0	0	1	1	-10.0919	0	-0.584963	-0.584963	Common	Cdkn2a
Q8C0E2	0	1	0	0	0	1	-0.5	0.25	-1.08155	0.378197	0.611457	-9.41486	0	0	-0.584963	Common	Vps26b
Q3U7R1	0	0	0	0	1	1	0	0	0	1	1	-10.0919	0	-1	-1	Common	Esyt1
Q9CVB6	0	0	0	0	2	0	0	0	0	1	1	-10.0919	0	-1	-1	Common	Arpc2
Q9Z2B9	1	0	0	0	0	0	-0.5	0.25	-1.08155	0.378197	0.611457	-9.41486	0	0.584963	0	Common	Rps6ka4
Q9DCG9	1	1	1	0	0	1	-0.5	0.75	-1.08155	0.378197	0.611457	-9.41486	0	0.415037	0	Common	Trmt112
O08759	0	0	0	0	0	1	0	0	0	1	1	-10.0919	0	-0.584963	-0.584963	Common	Ube3a
Q99MR8	0	1	0	0	0	0	-0.5	0.25	-1.08155	0.378197	0.611457	-9.41486	0	0.584963	0	Common	Mccc1
Q61216	0	0	0	0	0	1	0	0	0	1	1	-10.0919	0	-0.584963	-0.584963	Common	Mre11
Q99JB2	0	0	0	0	1	1	0	0	0	1	1	-10.0919	0	-1	-1	Common	Stoml2
Q99L47	1	0	0	0	1	1	-0.5	0.25	-1.08155	0.378197	0.611457	-9.41486	0	-0.415037	-1	Common	St13
P45376	1	0	0	1	0	0	0	0.5	0	1	1	-10.0919	0	0.584963	0.584963	Common	Akr1b1
P68510	0	0	0	0	1	0	0	0	0	1	1	-10.0919	0	-0.584963	-0.584963	Common	Ywhah
Q9WVE8	0	0	0	0	1	0	0	0	0	1	1	-10.0919	0	-0.584963	-0.584963	Common	Pacsin2
Q9D819	0	0	0	0	1	0	0	0	0	1	1	-10.0919	0	-0.584963	-0.584963	Common	Ppa1
P14069	0	0	1	0	1	0	0.5	0.25	1.08155	0.378197	0.611457	-9.41486	0	-0.584963	0	Common	S100a6
Q9EP69	0	0	0	0	1	0	0	0	0	1	1	-10.0919	0	-0.584963	-0.584963	Common	Sacm1l
Q63678	0	0	0	0	1	0	0	0	0	1	1	-10.0919	0	-0.584963	-0.584963	Common	Azgp1
Q8K298	0	0	0	0	1	0	0	0	0	1	1	-10.0919	0	-0.584963	-0.584963	Common	Anln
P35585	0	0	0	0	1	0	0	0	0	1	1	-10.0919	0	-0.584963	-0.584963	Common	Ap1m1
P30681	0	0	1	0	0	0	0.5	0.25	1.08155	0.378197	0.611457	-9.41486	0	0	0.584963	Common	Hmgb2
Q9CWJ9	0	0	0	0	0	1	0	0	0	1	1	-10.0919	0	-0.584963	-0.584963	Common	Atic
P35564	1	0	0	0	0	0	-0.5	0.25	-1.08155	0.378197	0.611457	-9.41486	0	0.584963	0	Common	Canx
P35565	1	0	0	0	0	0	-0.5	0.25	-1.08155	0.378197	0.611457	-9.41486	0	0.584963	0	Common	Canx
O75821	0	0	0	1	0	0	0.5	0.25	1.08155	0.378197	0.611457	-9.41486	0	0	0.584963	Common	EIF3G
Q3THK3	0	1	0	0	0	0	-0.5	0.25	-1.08155	0.378197	0.611457	-9.41486	0	0.584963	0	Common	Gtf2f1
Q8R550	0	0	0	0	1	0	0	0	0	1	1	-10.0919	0	-0.584963	-0.584963	Common	Sh3kbp1
Q8BGS0	0	0	1	0	0	0	0.5	0.25	1.08155	0.378197	0.611457	-9.41486	0	0	0.584963	Common	Mak16
O04951	0	0	0	0	0	1	0	0	0	1	1	-10.0919	0	-0.584963	-0.584963	Common	PP2A5
Q6ZPZ3	0	1	0	0	0	0	-0.5	0.25	-1.08155	0.378197	0.611457	-9.41486	0	0.584963	0	Common	Zc3h4
Q99K30	0	0	0	0	0	1	0	0	0	1	1	-10.0919	0	-0.584963	-0.584963	Common	Eps8l2
Q8VCY6	1	0	0	0	0	0	-0.5	0.25	-1.08155	0.378197	0.611457	-9.41486	0	0.584963	0	Common	Utp6
Q8BMS1	0	0	0	0	0	1	0	0	0	1	1	-10.0919	0	-0.584963	-0.584963	Common	Hadha
Q9Z0U0	0	0	0	0	1	0	0	0	0	1	1	-10.0919	0	-0.584963	-0.584963	Common	Xpr1
Q8K4B0	0	0	0	0	0	1	0	0	0	1	1	-10.0919	0	-0.584963	-0.584963	Common	Mta1
Q924K8	0	0	0	0	0	1	0	0	0	1	1	-10.0919	0	-0.584963	-0.584963	Common	Mta3
Q9JI11	0	0	0	0	1	0	0	0	0	1	1	-10.0919	0	-0.584963	-0.584963	Common	Stk4
Q9JI10	0	0	0	0	1	0	0	0	0	1	1	-10.0919	0	-0.584963	-0.584963	Common	Stk3
Q925I1	0	0	0	0	1	0	0	0	0	1	1	-10.0919	0	-0.584963	-0.584963	Common	Atad3
Q8CB44	0	0	0	0	1	0	0	0	0	1	1	-10.0919	0	-0.584963	-0.584963	Common	Gramd4
Q1HFZ0	0	0	0	1	0	0	0.5	0.25	1.08155	0.378197	0.611457	-9.41486	0	0	0.584963	Common	Nsun2
Q9Y4I1	1	0	0	0	0	0	-0.5	0.25	-1.08155	0.378197	0.611457	-9.41486	0	0.584963	0	Common	MYO5A
Q99104	1	0	0	0	0	0	-0.5	0.25	-1.08155	0.378197	0.611457	-9.41486	0	0.584963	0	Common	Myo5a
Q02440	1	0	0	0	0	0	-0.5	0.25	-1.08155	0.378197	0.611457	-9.41486	0	0.584963	0	Common	MYO5A
Q8R1F1	0	0	1	0	1	1	0.5	0.25	1.08155	0.378197	0.611457	-9.41486	0	-1	-0.415037	Common	Fam129b
P70296	0	1	0	0	0	1	-0.5	0.25	-1.08155	0.378197	0.611457	-9.41486	0	0	-0.584963	Common	Pebp1
Q61235	0	0	0	0	1	0	0	0	0	1	1	-10.0919	0	-0.584963	-0.584963	Common	Sntb2
Q9R0L6	0	0	1	0	1	0	0.5	0.25	1.08155	0.378197	0.611457	-9.41486	0	-0.584963	0	Common	Pcm1
A2A863	0	0	0	0	0	1	0	0	0	1	1	-10.0919	0	-0.584963	-0.584963	Common	Itgb4
Q8BH35	0	1	0	1	0	0	1.11022e-16	0.5	1.69821e-16	1	1	-10.0919	0	0.584963	0.584963	Common	C8b
Q5FWK3	0	0	0	0	1	1	0	0	0	1	1	-10.0919	0	-1	-1	Common	Arhgap1
Q9QYJ0	0	0	0	0	0	1	0	0	0	1	1	-10.0919	0	-0.584963	-0.584963	Common	Dnaja2
Q9Z1M8	0	0	1	0	0	0	0.5	0.25	1.08155	0.378197	0.611457	-9.41486	0	0	0.584963	Common	Ik
Q9QYC0	1	0	0	0	1	0	-0.5	0.25	-1.08155	0.378197	0.611457	-9.41486	0	0	-0.584963	Common	Add1
Q8BK64	0	0	0	0	0	1	0	0	0	1	1	-10.0919	0	-0.584963	-0.584963	Common	Ahsa1
Q8BJ34	0	0	1	0	0	0	0.5	0.25	1.08155	0.378197	0.611457	-9.41486	0	0	0.584963	Common	Marf1
P11031	0	1	1	0	0	0	1.11022e-16	0.5	1.69821e-16	1	1	-10.0919	0	0.584963	0.584963	Common	Sub1
A2AJI0	0	0	0	0	1	0	0	0	0	1	1	-10.0919	0	-0.584963	-0.584963	Common	Map7d1
Q9DC63	0	0	0	0	0	1	0	0	0	1	1	-10.0919	0	-0.584963	-0.584963	Common	Fbxo3
Q2KN98	0	0	0	0	1	0	0	0	0	1	1	-10.0919	0	-0.584963	-0.584963	Common	Specc1l
Q8BFY9	0	0	0	0	1	0	0	0	0	1	1	-10.0919	0	-0.584963	-0.584963	Common	Tnpo1
P09055	0	0	0	0	1	0	0	0	0	1	1	-10.0919	0	-0.584963	-0.584963	Common	Itgb1
P16254	0	0	1	0	0	0	0.5	0.25	1.08155	0.378197	0.611457	-9.41486	0	0	0.584963	Common	Srp14
P59999	0	0	0	0	1	1	0	0	0	1	1	-10.0919	0	-1	-1	Common	Arpc4
Q6PCL9	0	0	0	0	1	1	0	0	0	1	1	-10.0919	0	-1	-1	Common	Papolg
Q61210	0	0	0	0	1	0	0	0	0	1	1	-10.0919	0	-0.584963	-0.584963	Common	Arhgef1
P55264	0	1	0	1	0	0	1.11022e-16	0.5	1.69821e-16	1	1	-10.0919	0	0.584963	0.584963	Common	Adk
P55262	0	1	0	1	0	0	1.11022e-16	0.5	1.69821e-16	1	1	-10.0919	0	0.584963	0.584963	Common	ADK
Q64640	0	1	0	1	0	0	1.11022e-16	0.5	1.69821e-16	1	1	-10.0919	0	0.584963	0.584963	Common	Adk
Q8BSS9	0	0	0	0	1	1	0	0	0	1	1	-10.0919	0	-1	-1	Common	Ppfia2
Q7TMB8	0	0	0	0	1	0	0	0	0	1	1	-10.0919	0	-0.584963	-0.584963	Common	Cyfip1
Q5SQX6	0	0	0	0	1	0	0	0	0	1	1	-10.0919	0	-0.584963	-0.584963	Common	Cyfip2
P56546	0	0	0	1	0	0	0.5	0.25	1.08155	0.378197	0.611457	-9.41486	0	0	0.584963	Common	Ctbp2
Q9DBR0	1	0	1	1	0	0	0.5	0.75	1.08155	0.378197	0.611457	-9.41486	0	0.584963	1	Common	Akap8
O35551	0	0	1	0	0	0	0.5	0.25	1.08155	0.378197	0.611457	-9.41486	0	0	0.584963	Common	Rabep1
P13899	0	0	0	1	0	0	0.5	0.25	1.08155	0.378197	0.611457	-9.41486	0	0	0.584963	Common	Genome
P08545	0	0	0	1	0	0	0.5	0.25	1.08155	0.378197	0.611457	-9.41486	0	0	0.584963	Common	Genome
P08544	0	0	0	1	0	0	0.5	0.25	1.08155	0.378197	0.611457	-9.41486	0	0	0.584963	Common	Genome
Q94BQ2	0	0	0	0	2	0	0	0	0	1	1	-10.0919	0	-1	-1	Common	RPT6B
Q9C5U3	0	0	0	0	2	0	0	0	0	1	1	-10.0919	0	-1	-1	Common	RPT6A
P97822	0	0	0	1	0	0	0.5	0.25	1.08155	0.378197	0.611457	-9.41486	0	0	0.584963	Common	Anp32e
Q9R1T4	0	0	0	0	1	1	0	0	0	1	1	-10.0919	0	-1	-1	Common	2025-09-06
F4HZB5	2	1	1	1	0	3	-0.5	1.25	-1.08155	0.378197	0.611457	-9.41486	0	0	-0.321928	Common	NET1D
P46460	0	0	0	0	0	1	0	0	0	1	1	-10.0919	0	-0.584963	-0.584963	Common	Nsf
Q5DTT1	1	0	1	0	0	0	1.4803e-16	0.5	2.26427e-16	1	1	-10.0919	0	0.584963	0.584963	Common	Nexmif
O94804	0	0	0	0	1	0	0	0	0	1	1	-10.0919	0	-0.584963	-0.584963	Common	STK10
Q02357	0	0	1	0	0	0	0.5	0.25	1.08155	0.378197	0.611457	-9.41486	0	0	0.584963	Common	Ank1
Q3TLH4	0	0	0	0	1	1	0	0	0	1	1	-10.0919	0	-1	-1	Common	Prrc2c
P97461	0	0	0	0	0	1	0	0	0	1	1	-10.0919	0	-0.584963	-0.584963	Common	Rps5
Q8K1M6	0	0	1	0	1	1	0.5	0.25	1.08155	0.378197	0.611457	-9.41486	0	-1	-0.415037	Common	Dnm1l
O08529	1	0	0	0	0	0	-0.5	0.25	-1.08155	0.378197	0.611457	-9.41486	0	0.584963	0	Common	Capn2
Q9ERG2	0	0	0	0	1	1	0	0	0	1	1	-10.0919	0	-1	-1	Common	Strn3
Q8K2V1	0	0	0	0	0	1	0	0	0	1	1	-10.0919	0	-0.584963	-0.584963	Common	Ppp4r1
P50136	0	0	0	0	0	1	0	0	0	1	1	-10.0919	0	-0.584963	-0.584963	Common	Bckdha
Q9D1R9	0	0	0	0	0	1	0	0	0	1	1	-10.0919	0	-0.584963	-0.584963	Common	Rpl34
P62315	0	0	1	0	0	0	0.5	0.25	1.08155	0.378197	0.611457	-9.41486	0	0	0.584963	Common	Snrpd1
Q64331	1	0	0	0	0	0	-0.5	0.25	-1.08155	0.378197	0.611457	-9.41486	0	0.584963	0	Common	Myo6
O88544	0	0	0	0	1	0	0	0	0	1	1	-10.0919	0	-0.584963	-0.584963	Common	Cops4
Q9WVG6	0	0	0	0	1	0	0	0	0	1	1	-10.0919	0	-0.584963	-0.584963	Common	Carm1
Q91ZU6	0	1	0	0	0	0	-0.5	0.25	-1.08155	0.378197	0.611457	-9.41486	0	0.584963	0	Common	Dst
Q9ESM6	0	0	0	0	1	0	0	0	0	1	1	-10.0919	0	-0.584963	-0.584963	Common	Gdpd2
Q9FH21	0	0	0	0	1	0	0	0	0	1	1	-10.0919	0	-0.584963	-0.584963	Common	DTX55
P46735	0	0	0	0	0	2	0	0	0	1	1	-10.0919	0	-1	-1	Common	Myo1b
O88329	0	0	0	0	0	2	0	0	0	1	1	-10.0919	0	-1	-1	Common	Myo1a
Q9SEY5	0	0	0	0	1	1	0	0	0	1	1	-10.0919	0	-1	-1	Common	AAE2
B2MW49	0	0	0	0	1	1	0	0	0	1	1	-10.0919	0	-1	-1	Common	L
Q8BKX6	0	0	0	0	1	1	0	0	0	1	1	-10.0919	0	-1	-1	Common	Smg1
Q6NZL6	0	0	0	0	1	1	0	0	0	1	1	-10.0919	0	-1	-1	Common	Tonsl
Q9ERK4	1	0	0	0	1	0	-0.5	0.25	-1.08155	0.378197	0.611457	-9.41486	0	0	-0.584963	Common	Cse1l
Q3TEA8	0	0	0	1	0	0	0.5	0.25	1.08155	0.378197	0.611457	-9.41486	0	0	0.584963	Common	Hp1bp3
P52430	0	0	0	1	0	0	0.5	0.25	1.08155	0.378197	0.611457	-9.41486	0	0	0.584963	Common	Pon1
Q80TE4	0	0	0	1	0	0	0.5	0.25	1.08155	0.378197	0.611457	-9.41486	0	0	0.584963	Common	Sipa1l2
Q8L7T6	0	1	2	0	1	1	0.5	0.75	0.483718	0.670134	0.968868	-9.9327	0	-0.415037	0	Common	JMJ19
Q99MJ9	0	1	0	0	0	0	-0.5	0.25	-1.08155	0.378197	0.611457	-9.41486	0	0.584963	0	Common	Ddx50
Q80WS3	1	0	0	1	0	0	0	0.5	0	1	1	-10.0919	0	0.584963	0.584963	Common	Fbll1
Q9FZA2	0	2	0	0	0	0	-1	0.5	-1.08162	0.37817	0.611457	-9.41479	0	1	0	Common	AGP31
Q9QYS9	0	0	1	0	0	0	0.5	0.25	1.08155	0.378197	0.611457	-9.41486	0	0	0.584963	Common	Qki
Q5DTH5	0	0	1	0	0	0	0.5	0.25	1.08155	0.378197	0.611457	-9.41486	0	0	0.584963	Common	Tshz1
Q99KV1	0	0	0	0	1	0	0	0	0	1	1	-10.0919	0	-0.584963	-0.584963	Common	Dnajb11
P48678	18	15	24	26	24	25	8.5	20.75	5.09987	0.0259816	0.183399	-5.92652	2	-0.543142	0.0280144	Common	Lmna
Q8VHX6	3	4	16	9	24	20	9	8	2.75342	0.0930272	0.397112	-7.67959	1	-2.35364	-0.768674	Common	Flnc
P07356	13	14	15	15	26	22	1.5	14.25	3.24464	0.0674442	0.319473	-7.24537	1	-0.785875	-0.643856	Common	Anxa2
Q61879	4	3	7	6	21	18	3	5	4.58882	0.0326888	0.22065	-6.24703	1	-2.18763	-1.45066	Common	Myh10
P49312	21	20	22	23	13	9	2	21.5	3.05922	0.0758276	0.32627	-7.4044	1	0.841302	0.969626	Common	Hnrnpa1
P09867	21	20	22	23	13	9	2	21.5	3.05922	0.0758276	0.32627	-7.4044	1	0.841302	0.969626	Common	HNRNPA1
P68033	14	14	29	25	36	37	13	20.5	7.03066	0.0127078	0.108066	-4.9211	2	-1.32193	-0.421464	Common	Actc1
P57780	8	7	9	9	18	14	1.5	8.25	3.24464	0.0674442	0.319473	-7.24537	1	-1	-0.765535	Common	Actn4
Q8CFI7	7	9	12	12	0	1	4	10	4.32648	0.037096	0.239902	-6.42288	1	2.58496	3.11548	Common	Polr2b
Q91WJ8	11	10	12	13	7	5	2	11.5	3.05922	0.0758276	0.32627	-7.4044	1	0.716207	0.947533	Common	Fubp1
O08638	2	1	3	4	12	8	2	2.5	3.05922	0.0758276	0.32627	-7.4044	1	-2.1375	-1.28951	Common	Myh11
P42932	2	1	4	5	12	6	3	3	4.58882	0.0326888	0.22065	-6.24703	1	-2	-0.862496	Common	Cct8
O08553	1	1	4	3	5	3	2.5	2.25	5.40773	0.0228406	0.163363	-5.74611	2	-1.32193	-0.152003	Common	Dpysl2
P62082	4	8	12	10	7	4	5	8.5	2.41862	0.118409	0.478924	-7.99988	1	0.106915	0.884523	Common	Rps7
O60814	15	19	46	28	22	23	20	27	2.34642	0.125052	0.478924	-8.07154	1	-0.384664	0.693339	Common	HIST1H2BK
Q8CGP1	15	19	46	28	22	23	20	27	2.34642	0.125052	0.478924	-8.07154	1	-0.384664	0.693339	Common	Hist1h2bk
P10854	15	19	46	28	22	23	20	27	2.34642	0.125052	0.478924	-8.07154	1	-0.384664	0.693339	Common	Hist1h2bm
Q99879	15	19	46	28	22	23	20	27	2.34642	0.125052	0.478924	-8.07154	1	-0.384664	0.693339	Common	HIST1H2BM
Q93079	15	19	46	28	22	23	20	27	2.34642	0.125052	0.478924	-8.07154	1	-0.384664	0.693339	Common	HIST1H2BH
P10853	15	19	46	28	22	23	20	27	2.34642	0.125052	0.478924	-8.07154	1	-0.384664	0.693339	Common	Hist1h2bf
Q64525	15	19	46	28	22	23	20	27	2.34642	0.125052	0.478924	-8.07154	1	-0.384664	0.693339	Common	Hist2h2bb
P62807	15	19	46	28	22	23	20	27	2.34642	0.125052	0.478924	-8.07154	1	-0.384664	0.693339	Common	HIST1H2BC
Q99880	15	19	46	28	22	23	20	27	2.34642	0.125052	0.478924	-8.07154	1	-0.384664	0.693339	Common	HIST1H2BL
Q64475	15	19	46	28	22	23	20	27	2.34642	0.125052	0.478924	-8.07154	1	-0.384664	0.693339	Common	Hist1h2bb
P58876	15	19	46	28	22	23	20	27	2.34642	0.125052	0.478924	-8.07154	1	-0.384664	0.693339	Common	HIST1H2BD
Q8CGP2	15	19	46	28	22	23	20	27	2.34642	0.125052	0.478924	-8.07154	1	-0.384664	0.693339	Common	Hist1h2bp
Q64478	15	19	46	28	22	23	20	27	2.34642	0.125052	0.478924	-8.07154	1	-0.384664	0.693339	Common	Hist1h2bh
Q6ZWY9	15	19	46	28	22	23	20	27	2.34642	0.125052	0.478924	-8.07154	1	-0.384664	0.693339	Common	Hist1h2bc
Q99877	15	19	46	28	22	23	20	27	2.34642	0.125052	0.478924	-8.07154	1	-0.384664	0.693339	Common	HIST1H2BN
P63276	3	2	4	4	5	4	1.5	3.25	3.24464	0.0674442	0.319473	-7.24537	1	-0.652077	-0.137504	Common	Rps17
P25444	4	4	9	7	4	4	4	6	4.32648	0.037096	0.239902	-6.42288	1	0	0.847997	Common	Rps2
O55143	3	2	8	5	2	2	4	4.5	2.73635	0.0941357	0.398692	-7.69544	1	0.222392	1.32193	Common	Atp2a2
P21107	2	1	5	4	10	7	3	3	4.58882	0.0326888	0.22065	-6.24703	1	-1.926	-0.788496	Common	Tpm3
Q62376	5	3	7	6	1	1	2.5	5.25	2.41859	0.118412	0.478924	-7.99991	1	1.32193	1.90689	Common	Snrnp70
O55131	1	1	2	3	4	5	1.5	1.75	3.24464	0.0674442	0.319473	-7.24537	1	-1.45943	-0.652077	Common	2025-09-07
P43277	3	2	5	6	0	1	3	4	4.58882	0.0326888	0.22065	-6.24703	1	1.22239	2.11548	Common	Hist1h1d
Q8QZY1	0	1	2	2	4	4	1.5	1.25	3.24464	0.0674442	0.319473	-7.24537	1	-1.73697	-0.736966	Common	Eif3l
Q01320	3	2	6	4	2	1	2.5	3.75	2.41859	0.118412	0.478924	-7.99991	1	0.485427	1.26303	Common	Top2a
P35980	3	5	8	6	6	6	3	5.5	2.29449	0.130134	0.493141	-8.12364	1	-0.485427	0.192645	Common	Rpl18
Q9CZM2	6	6	8	9	5	2	2.5	7.25	5.40773	0.0228406	0.163363	-5.74611	2	0.63743	1.078	Common	Rpl15
Q60865	5	4	6	6	1	1	1.5	5.25	3.24464	0.0674442	0.319473	-7.24537	1	1.45943	1.80735	Common	Caprin1
P62962	1	2	6	5	8	7	4	3.5	6.11843	0.0173642	0.144256	-5.3611	2	-1.76553	-0.387023	Common	Pfn1
P43274	2	1	5	3	0	2	2.5	2.75	2.41859	0.118412	0.478924	-7.99991	1	0.321928	1.32193	Common	Hist1h1e
Q6PHZ2	0	1	2	3	4	5	2	1.5	3.05922	0.0758276	0.32627	-7.4044	1	-1.87447	-0.652077	Common	Camk2d
P63101	0	0	2	5	8	3	3.5	1.75	2.52381	0.109539	0.456764	-7.8971	1	-2.70044	-0.530515	Common	Ywhaz
P14131	2	3	5	6	5	4	3	4	4.58882	0.0326888	0.22065	-6.24703	1	-0.652077	0.241008	Common	Rps16
Q09167	2	1	3	4	1	3	2	2.5	3.05922	0.0758276	0.32627	-7.4044	1	-0.263034	0.584963	Common	Srsf5
O35326	2	1	3	4	1	3	2	2.5	3.05922	0.0758276	0.32627	-7.4044	1	-0.263034	0.584963	Common	Srsf5
Q13243	2	1	3	4	1	3	2	2.5	3.05922	0.0758276	0.32627	-7.4044	1	-0.263034	0.584963	Common	SRSF5
Q9Z1N5	2	2	4	5	3	3	2.5	3.25	5.40773	0.0228406	0.163363	-5.74611	2	-0.415037	0.459432	Common	Ddx39b
P62301	3	2	4	4	3	3	1.5	3.25	3.24464	0.0674442	0.319473	-7.24537	1	-0.192645	0.321928	Common	Rps13
Q6P5H2	0	0	5	2	6	6	3.5	1.75	2.52381	0.109539	0.456764	-7.8971	1	-2.80735	-0.63743	Common	Nes
Q6PAR5	2	2	4	5	0	0	2.5	3.25	5.40773	0.0228406	0.163363	-5.74611	2	1.58496	2.45943	Common	Gapvd1
Q9DBE9	1	0	3	2	0	1	2	1.5	3.05922	0.0758276	0.32627	-7.4044	1	0	1.22239	Common	Ftsj3
P23198	3	2	5	4	3	4	2	3.5	3.05922	0.0758276	0.32627	-7.4044	1	-0.36257	0.289507	Common	Cbx3
P47856	1	0	2	2	2	3	1.5	1.25	3.24464	0.0674442	0.319473	-7.24537	1	-1.22239	-0.222392	Common	Gfpt1
P62270	4	2	6	5	4	2	2.5	4.25	2.41859	0.118412	0.478924	-7.99991	1	0	0.70044	Common	Rps18
P62900	3	2	4	4	2	2	1.5	3.25	3.24464	0.0674442	0.319473	-7.24537	1	0.222392	0.736966	Common	Rpl31
P70318	1	2	3	3	0	1	1.5	2.25	3.24464	0.0674442	0.319473	-7.24537	1	0.736966	1.41504	Common	Tial1
P35700	0	0	2	3	6	4	2.5	1.25	5.40773	0.0228406	0.163363	-5.74611	2	-2.58496	-0.777608	Common	Prdx1
Q8VED5	1	0	2	4	6	3	2.5	1.75	2.41859	0.118412	0.478924	-7.99991	1	-1.87447	-0.459432	Common	Krt79
Q9CQN1	0	0	1	2	4	4	1.5	0.75	3.24464	0.0674442	0.319473	-7.24537	1	-2.32193	-1	Common	Trap1
Q62093	5	5	8	7	6	5	2.5	6.25	5.40773	0.0228406	0.163363	-5.74611	2	-0.115477	0.387023	Common	Srsf2
Q02105	4	2	7	8	0	0	4.5	5.25	4.35346	0.036606	0.239603	-6.40441	1	2	3.08746	Common	C1qc
Q9R0U0	1	1	4	3	2	4	2.5	2.25	5.40773	0.0228406	0.163363	-5.74611	2	-1	0.169925	Common	Srsf10
Q6ZWV7	2	1	3	3	2	2	1.5	2.25	3.24464	0.0674442	0.319473	-7.24537	1	-0.263034	0.415037	Common	Rpl35
P62855	1	1	4	3	2	1	2.5	2.25	5.40773	0.0228406	0.163363	-5.74611	2	-0.321928	0.847997	Common	Rps26
Q922K7	1	1	3	2	1	2	1.5	1.75	3.24464	0.0674442	0.319473	-7.24537	1	-0.321928	0.485427	Common	Nop2
Q62036	0	0	3	2	0	0	2.5	1.25	5.40773	0.0228406	0.163363	-5.74611	2	0	1.80735	Common	Cep131
Q9CXW4	1	2	3	3	3	2	1.5	2.25	3.24464	0.0674442	0.319473	-7.24537	1	-0.485427	0.192645	Common	Rpl11
P27773	1	0	2	2	3	1	1.5	1.25	3.24464	0.0674442	0.319473	-7.24537	1	-1	0	Common	Pdia3
P51881	0	0	1	2	1	1	1.5	0.75	3.24464	0.0674442	0.319473	-7.24537	1	-1	0.321928	Common	Slc25a5
Q8VE97	1	0	2	2	1	2	1.5	1.25	3.24464	0.0674442	0.319473	-7.24537	1	-0.736966	0.263034	Common	Srsf4
P62280	1	1	2	3	1	1	1.5	1.75	3.24464	0.0674442	0.319473	-7.24537	1	0	0.807355	Common	RPS11
P62281	1	1	2	3	1	1	1.5	1.75	3.24464	0.0674442	0.319473	-7.24537	1	0	0.807355	Common	Rps11
P62918	1	0	2	2	1	0	1.5	1.25	3.24464	0.0674442	0.319473	-7.24537	1	0	1	Common	Rpl8
Q5SW19	0	0	2	1	0	0	1.5	0.75	3.24464	0.0674442	0.319473	-7.24537	1	0	1.32193	Common	Cluh
Q04750	0	0	1	2	0	0	1.5	0.75	3.24464	0.0674442	0.319473	-7.24537	1	0	1.32193	Common	Top1
Q9D0I9	0	0	4	5	10	9	4.5	2.25	9.73392	0.00605379	0.0554076	-3.87154	2	-3.39232	-0.932886	Common	Rars
P20152	203	177	152	121	270	258	-53.5	163.25	-2.86052	0.0864564	0.370527	-7.58134	1	-0.47242	-0.946561	Common	Vim
Q8BTM8	37	37	30	25	69	60	-9.5	32.25	-4.11024	0.0413739	0.265975	-6.57419	1	-0.785495	-1.20053	Common	Flna
Q80X90	29	33	21	14	69	51	-13.5	24.25	-3.62236	0.0538944	0.319473	-6.93875	1	-0.930737	-1.72128	Common	Flnb
P05787	24	17	4	3	48	44	-17	12	-5.2009	0.0248876	0.176833	-5.86633	2	-1.12832	-3.38466	Common	KRT8
P68373	26	26	17	8	36	34	-13.5	19.25	-3.24493	0.067432	0.319473	-7.24513	1	-0.415037	-1.41504	Common	Tuba1c
Q7TMM9	20	20	18	15	40	34	-3.5	18.25	-2.52381	0.109539	0.456764	-7.8971	1	-0.85561	-1.11864	Common	Tubb2a
Q9CWF2	20	20	18	15	40	34	-3.5	18.25	-2.52381	0.109539	0.456764	-7.8971	1	-0.85561	-1.11864	Common	Tubb2b
P11142	25	26	24	23	41	33	-2	24.5	-3.05922	0.0758276	0.32627	-7.4044	1	-0.520007	-0.633218	Common	HSPA8
P63017	25	26	24	23	41	33	-2	24.5	-3.05922	0.0758276	0.32627	-7.4044	1	-0.520007	-0.633218	Common	Hspa8
Q8R081	32	28	23	24	16	9	-6.5	26.75	-3.41037	0.0609842	0.319473	-7.10805	1	1.19931	0.859822	Common	Hnrnpl
Q99PV0	11	10	8	8	9	8	-2.5	9.25	-5.40773	0.0228406	0.163363	-5.74611	2	0.275634	-0.0780025	Common	Prpf8
P68368	20	17	10	6	24	23	-10.5	13.25	-4.5429	0.0334058	0.224089	-6.27723	1	-0.329308	-1.44478	Common	Tuba4a
P10107	11	10	7	4	11	10	-5	8	-3.42043	0.0606197	0.319473	-7.09986	1	0	-0.823122	Common	Anxa1
Q9D8E6	17	19	14	11	5	2	-5.5	15.25	-3.29992	0.0651901	0.319473	-7.19908	1	2.078	1.58496	Common	Rpl4
P14873	10	12	5	2	11	10	-7.5	7.25	-4.49989	0.0340972	0.227315	-6.30573	1	0.0614005	-1.35364	Common	Map1b
Q9CX86	7	8	6	5	3	3	-2	6.5	-3.05922	0.0758276	0.32627	-7.4044	1	1.08746	0.70044	Common	Hnrnpa0
P42208	8	7	4	3	10	7	-4	5.5	-6.11843	0.0173642	0.144256	-5.3611	2	-0.160465	-1.078	Common	2025-09-02
Q99PL5	8	8	6	5	6	4	-2.5	6.75	-5.40773	0.0228406	0.163363	-5.74611	2	0.584963	0.115477	Common	Rrbp1
P70333	11	12	9	10	9	8	-2	10.5	-3.05922	0.0758276	0.32627	-7.4044	1	0.395929	0.14439	Common	Hnrnph2
P60335	12	11	10	10	12	9	-1.5	10.75	-3.24464	0.0674442	0.319473	-7.24537	1	0.120294	-0.0641303	Common	Pcbp1
Q8R0W0	4	6	1	2	3	2	-3.5	3.25	-3.38602	0.0618787	0.319473	-7.12795	1	0.777608	-0.485427	Common	Eppk1
Q61990	10	11	8	6	8	6	-3.5	8.75	-3.38602	0.0618787	0.319473	-7.12795	1	0.523562	0	Common	Pcbp2
P62960	5	6	2	3	3	3	-3	4	-4.58882	0.0326888	0.22065	-6.24703	1	0.70044	-0.192645	Common	Ybx1
Q8BFW7	5	3	1	0	8	5	-3.5	2.25	-3.38602	0.0618787	0.319473	-7.12795	1	-0.584963	-2.32193	Common	Lpp
Q99KJ8	8	6	3	2	6	6	-4.5	4.75	-4.35346	0.036606	0.239603	-6.40441	1	0.192645	-1	Common	Dctn2
Q00PI9	5	5	4	3	1	1	-1.5	4.25	-3.24464	0.0674442	0.319473	-7.24537	1	1.58496	1.16993	Common	Hnrnpul2
P70372	9	7	6	5	3	3	-2.5	6.75	-2.41859	0.118412	0.478924	-7.99991	1	1.16993	0.70044	Common	Elavl1
P31977	5	4	3	3	9	7	-1.5	3.75	-3.24464	0.0674442	0.319473	-7.24537	1	-0.710493	-1.16993	Common	Ezr
P26040	5	4	3	3	9	7	-1.5	3.75	-3.24464	0.0674442	0.319473	-7.24537	1	-0.710493	-1.16993	Common	Ezr
P80315	4	6	1	3	13	8	-3	3.5	-2.29449	0.130134	0.493141	-8.12364	1	-0.938599	-1.9386	Common	Cct4
Q60668	11	12	8	6	6	6	-4.5	9.25	-4.35346	0.036606	0.239603	-6.40441	1	0.836501	0.192645	Common	Hnrnpd
Q99KP6	5	5	3	4	5	5	-1.5	4.25	-3.24464	0.0674442	0.319473	-7.24537	1	0	-0.415037	Common	Prpf19
Q9JMJ4	5	5	3	4	5	5	-1.5	4.25	-3.24464	0.0674442	0.319473	-7.24537	1	0	-0.415037	Common	Prpf19
Q3THE2	10	10	6	8	9	10	-3	8.5	-3.24486	0.0674349	0.319473	-7.24519	1	0.0671142	-0.392317	Common	Myl12b
O70400	6	7	3	2	7	3	-4	4.5	-6.11843	0.0173642	0.144256	-5.3611	2	0.321928	-0.777608	Common	Pdlim1
Q9Z1X4	5	4	2	2	0	0	-2.5	3.25	-5.40773	0.0228406	0.163363	-5.74611	2	2.45943	1.58496	Common	Ilf3
P61164	6	4	2	0	10	6	-4	3	-3.05932	0.0758225	0.32627	-7.40431	1	-0.584963	-2.16993	Common	Actr1a
P51410	4	3	2	1	4	2	-2	2.5	-3.05922	0.0758276	0.32627	-7.4044	1	0.169925	-0.678072	Common	Rpl9
O08788	3	4	1	0	3	3	-3	2	-4.58882	0.0326888	0.22065	-6.24703	1	0.169925	-1.41504	Common	Dctn1
Q91VI7	7	4	2	1	4	5	-4	3.5	-2.73635	0.0941357	0.398692	-7.69544	1	0.241008	-1.1375	Common	Rnh1
Q8R1B4	3	3	2	1	4	3	-1.5	2.25	-3.24464	0.0674442	0.319473	-7.24537	1	-0.169925	-0.847997	Common	Eif3c
P23116	3	3	2	1	5	3	-1.5	2.25	-3.24464	0.0674442	0.319473	-7.24537	1	-0.321928	-1	Common	Eif3a
P26043	4	4	2	1	7	5	-2.5	2.75	-5.40773	0.0228406	0.163363	-5.74611	2	-0.485427	-1.48543	Common	Rdx
P58871	1	2	0	0	8	2	-1.5	0.75	-3.24464	0.0674442	0.319473	-7.24537	1	-1.26303	-2.58496	Common	Tnks1bp1
Q61545	5	5	3	2	1	1	-2.5	3.75	-5.40773	0.0228406	0.163363	-5.74611	2	1.58496	0.807355	Common	Ewsr1
P62245	6	7	5	4	2	2	-2	5.5	-3.05922	0.0758276	0.32627	-7.4044	1	1.32193	0.874469	Common	Rps15a
Q64213	7	5	4	2	1	1	-3	4.5	-2.29449	0.130134	0.493141	-8.12364	1	1.80735	1	Common	Sf1
Q9QUJ7	3	2	0	0	5	3	-2.5	1.25	-5.40773	0.0228406	0.163363	-5.74611	2	-0.514573	-2.32193	Common	Acsl4
P61161	3	2	0	0	8	6	-2.5	1.25	-5.40773	0.0228406	0.163363	-5.74611	2	-1.19265	-3	Common	Actr2
Q9DCT8	2	3	0	1	2	2	-2	1.5	-3.05922	0.0758276	0.32627	-7.4044	1	0.222392	-1	Common	Crip2
P47962	5	5	3	2	2	1	-2.5	3.75	-5.40773	0.0228406	0.163363	-5.74611	2	1.26303	0.485427	Common	Rpl5
Q922B2	3	3	1	0	3	3	-2.5	1.75	-5.40773	0.0228406	0.163363	-5.74611	2	0	-1.41504	Common	Dars
Q61584	5	6	3	1	4	4	-3.5	3.75	-3.38602	0.0618787	0.319473	-7.12795	1	0.378512	-0.736966	Common	Fxr1
P97311	3	4	2	1	6	3	-2	2.5	-3.05922	0.0758276	0.32627	-7.4044	1	-0.289507	-1.1375	Common	Mcm6
Q3ULD5	3	2	1	0	0	0	-2	1.5	-3.05922	0.0758276	0.32627	-7.4044	1	1.80735	0.584963	Common	Mccc2
P24452	1	2	0	0	3	3	-1.5	0.75	-3.24464	0.0674442	0.319473	-7.24537	1	-0.678072	-2	Common	Capg
Q8VEE4	3	4	2	2	2	2	-1.5	2.75	-3.24464	0.0674442	0.319473	-7.24537	1	0.584963	0	Common	Rpa1
O89086	6	7	4	2	2	1	-3.5	4.75	-3.38602	0.0618787	0.319473	-7.12795	1	1.58496	0.678072	Common	Rbm3
P84099	7	6	5	4	3	1	-2	5.5	-3.05922	0.0758276	0.32627	-7.4044	1	1.32193	0.874469	Common	Rpl19
P0DOY3	6	6	5	4	5	4	-1.5	5.25	-3.24464	0.0674442	0.319473	-7.24537	1	0.347923	0	Common	IGLC3
P0DOY2	6	6	5	4	5	4	-1.5	5.25	-3.24464	0.0674442	0.319473	-7.24537	1	0.347923	0	Common	IGLC2
P47738	2	1	0	0	5	3	-1.5	0.75	-3.24464	0.0674442	0.319473	-7.24537	1	-1	-2.32193	Common	Aldh2
Q9DBC7	2	2	0	1	4	3	-1.5	1.25	-3.24464	0.0674442	0.319473	-7.24537	1	-0.584963	-1.58496	Common	Prkar1a
Q2F7J2	2	3	1	1	2	2	-1.5	1.75	-3.24464	0.0674442	0.319473	-7.24537	1	0.222392	-0.584963	Common	gag
Q8VDM6	3	4	2	1	0	0	-2	2.5	-3.05922	0.0758276	0.32627	-7.4044	1	2.16993	1.32193	Common	Hnrnpul1
Q9Z1Q5	2	2	1	0	2	3	-1.5	1.25	-3.24464	0.0674442	0.319473	-7.24537	1	-0.222392	-1.22239	Common	Clic1
Q6P5F9	2	2	1	0	2	2	-1.5	1.25	-3.24464	0.0674442	0.319473	-7.24537	1	0	-1	Common	Xpo1
Q9CQF3	4	3	2	0	0	0	-2.5	2.25	-2.41859	0.118412	0.478924	-7.99991	1	2.16993	1	Common	Nudt21
P31230	2	1	0	0	2	2	-1.5	0.75	-3.24464	0.0674442	0.319473	-7.24537	1	-0.263034	-1.58496	Common	Aimp1
Q8BMJ3	2	1	0	0	1	0	-1.5	0.75	-3.24464	0.0674442	0.319473	-7.24537	1	0.736966	-0.584963	Common	Eif1ax
Q60872	2	1	0	0	1	0	-1.5	0.75	-3.24464	0.0674442	0.319473	-7.24537	1	0.736966	-0.584963	Common	Eif1a
P61514	3	4	2	2	1	1	-1.5	2.75	-3.24464	0.0674442	0.319473	-7.24537	1	1.16993	0.584963	Common	Rpl37a
Q0KL02	2	3	0	0	0	0	-2.5	1.25	-5.40773	0.0228406	0.163363	-5.74611	2	1.80735	0	Common	Trio
P39749	1	2	0	0	1	0	-1.5	0.75	-3.24464	0.0674442	0.319473	-7.24537	1	0.736966	-0.584963	Common	Fen1
Q58A65	2	2	1	0	0	0	-1.5	1.25	-3.24464	0.0674442	0.319473	-7.24537	1	1.58496	0.584963	Common	Spag9
Q99JX7	3	2	0	1	1	1	-2	1.5	-3.05922	0.0758276	0.32627	-7.4044	1	0.807355	-0.415037	Common	Nxf1
P11440	2	1	0	0	2	1	-1.5	0.75	-3.24464	0.0674442	0.319473	-7.24537	1	0	-1.32193	Common	Cdk1
Q9Z108	1	2	0	0	1	0	-1.5	0.75	-3.24464	0.0674442	0.319473	-7.24537	1	0.736966	-0.584963	Common	Stau1
P14115	3	2	0	0	0	0	-2.5	1.25	-5.40773	0.0228406	0.163363	-5.74611	2	1.80735	0	Common	Rpl27a
Q8CH18	2	3	0	0	1	0	-2.5	1.25	-5.40773	0.0228406	0.163363	-5.74611	2	1.22239	-0.584963	Common	Ccar1
Q6P5D8	1	2	0	0	1	0	-1.5	0.75	-3.24464	0.0674442	0.319473	-7.24537	1	0.736966	-0.584963	Common	Smchd1
Q9ERG0	4	4	1	0	7	8	-3.5	2.25	-7.57083	0.0107472	0.0921189	-4.68438	2	-0.765535	-2.5025	Common	Lima1
Q923T9	1	1	2	2	3	3	1	1.5	159.975	8.8461e-06	8.68527e-05	5.15691	5	-1	-0.415037	Common	Camk2g
Q9CQ65	1	1	2	2	3	2	1	1.5	159.975	8.8461e-06	8.68527e-05	5.15691	5	-0.807355	-0.222392	Common	Mtap
Q62523	1	1	2	2	3	3	1	1.5	159.975	8.8461e-06	8.68527e-05	5.15691	5	-1	-0.415037	Common	Zyx
P01869	0	0	1	1	3	1	1	0.5	159.975	8.8461e-06	8.68527e-05	5.15691	5	-1.58496	-0.584963	Common	Ighg1
P01868	0	0	1	1	3	1	1	0.5	159.975	8.8461e-06	8.68527e-05	5.15691	5	-1.58496	-0.584963	Common	Ighg1
O70251	0	0	1	1	2	2	1	0.5	159.975	8.8461e-06	8.68527e-05	5.15691	5	-1.58496	-0.584963	Common	Eef1b
P62717	0	0	1	1	0	1	1	0.5	159.975	8.8461e-06	8.68527e-05	5.15691	5	-0.584963	0.415037	Common	Rpl18a
Q61753	0	0	1	1	3	3	1	0.5	159.975	8.8461e-06	8.68527e-05	5.15691	5	-2	-1	Common	Phgdh
Q9R1C7	0	0	1	1	1	1	1	0.5	159.975	8.8461e-06	8.68527e-05	5.15691	5	-1	0	Common	Prpf40a
Q9WV32	0	0	1	1	2	1	1	0.5	159.975	8.8461e-06	8.68527e-05	5.15691	5	-1.32193	-0.321928	Common	Arpc1b
Q62383	0	0	2	2	0	0	2	1	319.951	1.74741e-06	7.5488e-05	6.83311	6	0	1.58496	Common	Supt6h
P61982	0	0	1	1	1	1	1	0.5	159.975	8.8461e-06	8.68527e-05	5.15691	5	-1	0	Common	Ywhag
P48962	0	0	1	1	2	1	1	0.5	159.975	8.8461e-06	8.68527e-05	5.15691	5	-1.32193	-0.321928	Common	Slc25a4
P97452	0	0	1	1	0	0	1	0.5	159.975	8.8461e-06	8.68527e-05	5.15691	5	0	1	Common	Bop1
Q9Z277	0	0	1	1	0	0	1	0.5	159.975	8.8461e-06	8.68527e-05	5.15691	5	0	1	Common	Baz1b
Q9EQU5	0	0	1	1	1	1	1	0.5	159.975	8.8461e-06	8.68527e-05	5.15691	5	-1	0	Common	Set
Q9EPQ8	0	0	1	1	0	0	1	0.5	159.975	8.8461e-06	8.68527e-05	5.15691	5	0	1	Common	Tcf20
P14106	0	0	2	2	0	0	2	1	319.951	1.74741e-06	7.5488e-05	6.83311	6	0	1.58496	Common	C1qb
Q0VBL3	0	0	1	1	0	0	1	0.5	159.975	8.8461e-06	8.68527e-05	5.15691	5	0	1	Common	Rbm15
Q9D903	0	0	1	1	0	0	1	0.5	159.975	8.8461e-06	8.68527e-05	5.15691	5	0	1	Common	Ebna1bp2
Q921E6	0	0	1	1	0	0	1	0.5	159.975	8.8461e-06	8.68527e-05	5.15691	5	0	1	Common	Eed
O75530	0	0	1	1	0	0	1	0.5	159.975	8.8461e-06	8.68527e-05	5.15691	5	0	1	Common	EED
O35130	0	0	1	1	0	0	1	0.5	159.975	8.8461e-06	8.68527e-05	5.15691	5	0	1	Common	Emg1
P34022	0	0	1	1	1	0	1	0.5	159.975	8.8461e-06	8.68527e-05	5.15691	5	-0.584963	0.415037	Common	Ranbp1
P62852	0	0	1	1	1	1	1	0.5	159.975	8.8461e-06	8.68527e-05	5.15691	5	-1	0	Common	Rps25
Q9JJ11	0	0	1	1	0	0	1	0.5	159.975	8.8461e-06	8.68527e-05	5.15691	5	0	1	Common	Tacc3
Q923B1	0	0	1	1	0	0	1	0.5	159.975	8.8461e-06	8.68527e-05	5.15691	5	0	1	Common	Dbr1
Q9DC28	0	0	1	1	0	0	1	0.5	159.975	8.8461e-06	8.68527e-05	5.15691	5	0	1	Common	Csnk1d
Q8CCS6	0	0	1	1	0	0	1	0.5	159.975	8.8461e-06	8.68527e-05	5.15691	5	0	1	Common	Pabpn1
P57784	0	0	1	1	0	0	1	0.5	159.975	8.8461e-06	8.68527e-05	5.15691	5	0	1	Common	Snrpa1
Q08943	0	0	1	1	0	0	1	0.5	159.975	8.8461e-06	8.68527e-05	5.15691	5	0	1	Common	Ssrp1
P63323	0	0	1	1	1	1	1	0.5	159.975	8.8461e-06	8.68527e-05	5.15691	5	-1	0	Common	Rps12
P47964	0	0	1	1	0	0	1	0.5	159.975	8.8461e-06	8.68527e-05	5.15691	5	0	1	Common	Rpl36
Q8CGF7	0	0	1	1	0	0	1	0.5	159.975	8.8461e-06	8.68527e-05	5.15691	5	0	1	Common	Tcerg1
F4JLS1	0	0	1	1	3	3	1	0.5	159.975	8.8461e-06	8.68527e-05	5.15691	5	-2	-1	Common	LDL3
Q9JIF7	1	1	0	0	5	5	-1	0.5	-159.975	8.8461e-06	8.68527e-05	5.15691	5	-1.58496	-2.58496	Common	Copb1
Q6IRU2	2	2	0	0	6	2	-2	1	-319.951	1.74741e-06	7.5488e-05	6.83311	6	-0.736966	-2.32193	Common	Tpm4
Q99JY9	3	3	1	1	5	4	-2	2	-319.951	1.74741e-06	7.5488e-05	6.83311	6	-0.459432	-1.45943	Common	Actr3
Q3UKJ7	4	4	0	0	1	1	-4	2	-639.902	3.45157e-07	4.65962e-05	7.77814	6	1.32193	-1	Common	Smu1
P0DP28	2	2	0	0	2	3	-2	1	-319.951	1.74741e-06	7.5488e-05	6.83311	6	-0.222392	-1.80735	Common	Calm3
P0DP26	2	2	0	0	2	3	-2	1	-319.951	1.74741e-06	7.5488e-05	6.83311	6	-0.222392	-1.80735	Common	Calm1
P0DP27	2	2	0	0	2	3	-2	1	-319.951	1.74741e-06	7.5488e-05	6.83311	6	-0.222392	-1.80735	Common	Calm2
P62334	1	1	0	0	3	3	-1	0.5	-159.975	8.8461e-06	8.68527e-05	5.15691	5	-1	-2	Common	Psmc6
P61222	1	1	0	0	3	1	-1	0.5	-159.975	8.8461e-06	8.68527e-05	5.15691	5	-0.584963	-1.58496	Common	Abce1
Q6ZWX6	3	3	1	1	5	2	-2	2	-319.951	1.74741e-06	7.5488e-05	6.83311	6	-0.169925	-1.16993	Common	Eif2s1
Q9CW03	1	1	0	0	4	2	-1	0.5	-159.975	8.8461e-06	8.68527e-05	5.15691	5	-1	-2	Common	Smc3
Q60597	1	1	0	0	4	1	-1	0.5	-159.975	8.8461e-06	8.68527e-05	5.15691	5	-0.807355	-1.80735	Common	Ogdh
Q9WU78	2	2	0	0	3	2	-2	1	-319.951	1.74741e-06	7.5488e-05	6.83311	6	-0.222392	-1.80735	Common	Pdcd6ip
Q9D8N0	2	2	1	1	2	3	-1	1.5	-159.975	8.8461e-06	8.68527e-05	5.15691	5	-0.222392	-0.807355	Common	Eef1g
P99027	2	2	1	1	3	1	-1	1.5	-159.975	8.8461e-06	8.68527e-05	5.15691	5	0	-0.584963	Common	Rplp2
O35381	2	2	0	0	2	1	-2	1	-319.951	1.74741e-06	7.5488e-05	6.83311	6	0.263034	-1.32193	Common	Anp32a
Q9CRB9	1	1	0	0	2	2	-1	0.5	-159.975	8.8461e-06	8.68527e-05	5.15691	5	-0.584963	-1.58496	Common	Chchd3
P83887	1	1	0	0	1	1	-1	0.5	-159.975	8.8461e-06	8.68527e-05	5.15691	5	0	-1	Common	Tubg1
Q61598	2	2	0	0	2	1	-2	1	-319.951	1.74741e-06	7.5488e-05	6.83311	6	0.263034	-1.32193	Common	Gdi2
P24547	1	1	0	0	2	2	-1	0.5	-159.975	8.8461e-06	8.68527e-05	5.15691	5	-0.584963	-1.58496	Common	Impdh2
Q9D7X3	1	1	0	0	1	1	-1	0.5	-159.975	8.8461e-06	8.68527e-05	5.15691	5	0	-1	Common	Dusp3
Q08024	1	1	0	0	1	0	-1	0.5	-159.975	8.8461e-06	8.68527e-05	5.15691	5	0.415037	-0.584963	Common	Cbfb
Q3UZ39	1	1	0	0	1	1	-1	0.5	-159.975	8.8461e-06	8.68527e-05	5.15691	5	0	-1	Common	Lrrfip1
Q99PT1	1	1	0	0	1	1	-1	0.5	-159.975	8.8461e-06	8.68527e-05	5.15691	5	0	-1	Common	Arhgdia
P83940	1	1	0	0	1	1	-1	0.5	-159.975	8.8461e-06	8.68527e-05	5.15691	5	0	-1	Common	Eloc
P09450	1	1	0	0	0	0	-1	0.5	-159.975	8.8461e-06	8.68527e-05	5.15691	5	1	0	Common	Junb
Q68FL6	1	1	0	0	1	2	-1	0.5	-159.975	8.8461e-06	8.68527e-05	5.15691	5	-0.321928	-1.32193	Common	Mars
Q9DB05	1	1	0	0	1	1	-1	0.5	-159.975	8.8461e-06	8.68527e-05	5.15691	5	0	-1	Common	Napa
Q8VC70	1	1	0	0	0	1	-1	0.5	-159.975	8.8461e-06	8.68527e-05	5.15691	5	0.415037	-0.584963	Common	Rbms2
Q91YH5	1	1	0	0	1	1	-1	0.5	-159.975	8.8461e-06	8.68527e-05	5.15691	5	0	-1	Common	Atl3
O35345	1	1	0	0	0	1	-1	0.5	-159.975	8.8461e-06	8.68527e-05	5.15691	5	0.415037	-0.584963	Common	Kpna6
Q8K0V4	1	1	0	0	0	0	-1	0.5	-159.975	8.8461e-06	8.68527e-05	5.15691	5	1	0	Common	Cnot3
Q08369	1	1	0	0	0	0	-1	0.5	-159.975	8.8461e-06	8.68527e-05	5.15691	5	1	0	Common	Gata4
Q9D945	1	1	0	0	0	0	-1	0.5	-159.975	8.8461e-06	8.68527e-05	5.15691	5	1	0	Common	Llph
P33609	1	1	0	0	1	1	-1	0.5	-159.975	8.8461e-06	8.68527e-05	5.15691	5	0	-1	Common	Pola1
P42227	1	1	0	0	1	0	-1	0.5	-159.975	8.8461e-06	8.68527e-05	5.15691	5	0.415037	-0.584963	Common	Stat3
Q9Z2H5	1	1	0	0	0	0	-1	0.5	-159.975	8.8461e-06	8.68527e-05	5.15691	5	1	0	Common	Epb41l1
Q9CZD3	1	1	0	0	1	1	-1	0.5	-159.975	8.8461e-06	8.68527e-05	5.15691	5	0	-1	Common	Gars
Q62422	1	1	0	0	1	1	-1	0.5	-159.975	8.8461e-06	8.68527e-05	5.15691	5	0	-1	Common	Ostf1
Q9DBS9	1	1	0	0	1	0	-1	0.5	-159.975	8.8461e-06	8.68527e-05	5.15691	5	0.415037	-0.584963	Common	Osbpl3
Q9JHJ0	1	1	0	0	1	2	-1	0.5	-159.975	8.8461e-06	8.68527e-05	5.15691	5	-0.321928	-1.32193	Common	Tmod3
Q9R0I7	1	1	0	0	0	0	-1	0.5	-159.975	8.8461e-06	8.68527e-05	5.15691	5	1	0	Common	Ylpm1
Q5M9G1	1	1	0	0	0	0	-1	0.5	-159.975	8.8461e-06	8.68527e-05	5.15691	5	1	0	Common	Hexim1
P01027	1	1	0	0	0	0	-1	0.5	-159.975	8.8461e-06	8.68527e-05	5.15691	5	1	0	Common	C3
Q6P9R4	1	1	0	0	0	0	-1	0.5	-159.975	8.8461e-06	8.68527e-05	5.15691	5	1	0	Common	Arhgef18
Q9CYH6	1	1	0	0	0	0	-1	0.5	-159.975	8.8461e-06	8.68527e-05	5.15691	5	1	0	Common	Rrs1
P68040	5	5	7	7	8	7	2	6	319.951	1.74741e-06	7.5488e-05	6.83311	6	-0.5025	-0.0874628	Common	Rack1
P57776	3	3	4	4	5	6	1	3.5	159.975	8.8461e-06	8.68527e-05	5.15691	5	-0.70044	-0.378512	Common	Eef1d
Q8VDD5	78	69	39	36	144	117	-36	55.5	-8.20911	0.0089402	0.0797968	-4.42398	2	-0.81975	-1.77213	Common	Myh9
P11679	51	41	4	3	93	90	-42.5	24.75	-9.14835	0.00697961	0.0633444	-4.07332	2	-0.976793	-4.36146	Common	Krt8
Q921H8	5	5	2	1	18	14	-3.5	3.25	-7.57083	0.0107472	0.0921189	-4.68438	2	-1.5025	-2.76553	Common	Acaa1a
P06151	5	5	1	2	8	6	-3.5	3.25	-7.57083	0.0107472	0.0921189	-4.68438	2	-0.415037	-1.67807	Common	Ldha
P35579	55	52	29	25	100	78	-26.5	40.25	-11.4654	0.00415241	0.0393387	-3.33645	2	-0.723669	-1.6845	Common	MYH9
P19001	35	30	1	4	64	59	-30	17.5	-11.13	0.00444685	0.0414017	-3.43374	2	-0.899695	-4.15843	Common	Krt19
P05784	25	21	1	2	44	37	-21.5	12.25	-11.2805	0.00431122	0.040488	-3.38975	2	-0.790077	-4.05311	Common	Krt18
P26041	19	19	11	10	24	18	-8.5	14.75	-18.3863	0.0013886	0.0133901	-1.77953	3	-0.137504	-0.93587	Common	Msn
Q9Z110	6	6	5	5	18	13	-1	5.5	-159.975	8.8461e-06	8.68527e-05	5.15691	5	-1.23704	-1.45943	Common	Aldh18a1
P09411	12	12	4	4	17	10	-8	8	-1279.8	6.81763e-08	1.05186e-05	8.13057	7	-0.157541	-1.53605	Common	Pgk1
Q01853	4	4	3	3	10	8	-1	3.5	-159.975	8.8461e-06	8.68527e-05	5.15691	5	-1	-1.32193	Common	Vcp
P55072	4	4	3	3	10	8	-1	3.5	-159.975	8.8461e-06	8.68527e-05	5.15691	5	-1	-1.32193	Common	VCP
P97310	3	3	2	2	7	8	-1	2.5	-159.975	8.8461e-06	8.68527e-05	5.15691	5	-1.08746	-1.5025	Common	Mcm2
O08583	3	3	2	2	7	5	-1	2.5	-159.975	8.8461e-06	8.68527e-05	5.15691	5	-0.807355	-1.22239	Common	Alyref
Q62188	1	1	5	6	5	3	4.5	3.25	9.73392	0.00605379	0.0554076	-3.87154	2	-1.32193	0.378512	DKO Enriched	Dpysl3	Dpysl3
Q9D824	1	1	2	2	1	1	1	1.5	159.975	8.8461e-06	8.68527e-05	5.15691	5	0	0.584963	DKO Enriched	Fip1l1	Fip1l1
P62317	1	1	3	3	2	1	2	2	319.951	1.74741e-06	7.5488e-05	6.83311	6	-0.321928	0.678072	DKO Enriched	Snrpd2	Snrpd2
P59708	1	1	2	2	1	2	1	1.5	159.975	8.8461e-06	8.68527e-05	5.15691	5	-0.321928	0.263034	DKO Enriched	Sf3b6	Sf3b6
Q9D6Z1	1	1	2	2	1	1	1	1.5	159.975	8.8461e-06	8.68527e-05	5.15691	5	0	0.584963	DKO Enriched	Nop56	Nop56
Q9CXY6	1	1	2	2	2	1	1	1.5	159.975	8.8461e-06	8.68527e-05	5.15691	5	-0.321928	0.263034	DKO Enriched	Ilf2	Ilf2
P09405	19	20	27	29	13	9	8.5	23.75	8.2232	0.0089053	0.0797968	-4.41845	2	0.77259	1.27302	DKO Enriched	Ncl	Ncl
Q61656	16	15	26	26	10	10	10.5	20.75	22.7125	0.000848733	0.00825794	-1.07986	3	0.584963	1.29546	DKO Enriched	Ddx5	Ddx5
Q61937	7	7	17	17	14	9	10	12	1599.75	4.04457e-08	1.05186e-05	8.17834	7	-0.643856	0.526069	DKO Enriched	Npm1	Npm1
P17225	8	9	15	15	12	14	6.5	11.75	14.0601	0.00258992	0.0247532	-2.66569	3	-0.559427	0.192645	DKO Enriched	Ptbp1	Ptbp1
Q8NT03	6	6	14	14	4	6	8	10	1279.8	6.81763e-08	1.05186e-05	8.13057	7	0.222392	1.32193	DKO Enriched	Jena_K16Q	Jena_K16Q
Q8NT02	6	6	14	14	4	6	8	10	1279.8	6.81763e-08	1.05186e-05	8.13057	7	0.222392	1.32193	DKO Enriched	K16R	K16R
Q8NT01	6	6	14	14	4	6	8	10	1279.8	6.81763e-08	1.05186e-05	8.13057	7	0.222392	1.32193	DKO Enriched	Jena_Protein	Jena_Protein
P62806	6	6	14	14	4	6	8	10	1279.8	6.81763e-08	1.05186e-05	8.13057	7	0.222392	1.32193	DKO Enriched	Hist1h4a	Hist1h4a
P62805	6	6	14	14	4	6	8	10	1279.8	6.81763e-08	1.05186e-05	8.13057	7	0.222392	1.32193	DKO Enriched	HIST1H4A	HIST1H4A
P97760	2	2	4	4	0	1	2	3	319.951	1.74741e-06	7.5488e-05	6.83311	6	1	1.73697	DKO Enriched	Polr2c	Polr2c
Q64012	2	2	3	3	1	1	1	2.5	159.975	8.8461e-06	8.68527e-05	5.15691	5	0.584963	1	DKO Enriched	Raly	Raly
P35922	6	5	0	1	2	3	-5	3	-7.64804	0.0105025	0.0921189	-4.65182	2	0.893085	-1.22239	SKO Enriched	Fmr1	Fmr1
Q60605	6	5	1	0	5	5	-5	3	-7.64804	0.0105025	0.0921189	-4.65182	2	0.115477	-2	SKO Enriched	Myl6	Myl6
P62911	3	3	1	1	0	0	-2	2	-319.951	1.74741e-06	7.5488e-05	6.83311	6	2	1	SKO Enriched	Rpl32	Rpl32
Q99KG3	2	2	1	1	0	1	-1	1.5	-159.975	8.8461e-06	8.68527e-05	5.15691	5	1	0.415037	SKO Enriched	Rbm10	Rbm10
Q9DBG6	2	2	1	1	1	2	-1	1.5	-159.975	8.8461e-06	8.68527e-05	5.15691	5	0.263034	-0.321928	SKO Enriched	Rpn2	Rpn2
Q62189	3	3	1	1	0	0	-2	2	-319.951	1.74741e-06	7.5488e-05	6.83311	6	2	1	SKO Enriched	Snrpa	Snrpa
Q9JIK5	7	7	5	5	2	2	-2	6	-319.951	1.74741e-06	7.5488e-05	6.83311	6	1.41504	1	SKO Enriched	Ddx21	Ddx21
Q80WJ7	3	3	2	2	2	2	-1	2.5	-159.975	8.8461e-06	8.68527e-05	5.15691	5	0.415037	0	SKO Enriched	Mtdh	Mtdh
P35979	4	4	3	3	3	4	-1	3.5	-159.975	8.8461e-06	8.68527e-05	5.15691	5	0.152003	-0.169925	SKO Enriched	Rpl12	Rpl12
A0M8Q6	6	6	5	5	5	4	-1	5.5	-159.975	8.8461e-06	8.68527e-05	5.15691	5	0.347923	0.125531	SKO Enriched	IGLC7	IGLC7

## Sheet: Table S4
Supplement Table 4:
Statisitcal comparison of endpoint DKO tumor H3K27me3 IHC staining
Tukey's multiple comparisons test	Summary	Adjusted P Value
Vehicle-I vs. LY-PK-I	ns	0.9987
Vehicle-I vs. LY-EZ-I	**	0.0043
Vehicle-I vs. Combo-I	***	0.001
Vehicle-I vs. Vehicle-C	ns	0.9995
Vehicle-I vs. LY-PK-C	ns	0.9517
Vehicle-I vs. LY-EZ-C	***	0.0001
Vehicle-I vs. Combo-C	****	<0.0001
LY-PK-I vs. LY-EZ-I	*	0.02
LY-PK-I vs. Combo-I	**	0.0049
LY-PK-I vs. Vehicle-C	ns	>0.9999
LY-PK-I vs. LY-PK-C	ns	0.9995
LY-PK-I vs. LY-EZ-C	***	0.0007
LY-PK-I vs. Combo-C	***	0.0003
LY-EZ-I vs. Combo-I	ns	0.9993
LY-EZ-I vs. Vehicle-C	*	0.0162
LY-EZ-I vs. LY-PK-C	ns	0.0674
LY-EZ-I vs. LY-EZ-C	ns	0.9026
LY-EZ-I vs. Combo-C	ns	0.7726
Combo-I vs. Vehicle-C	**	0.0039
Combo-I vs. LY-PK-C	*	0.0184
Combo-I vs. LY-EZ-C	ns	0.9954
Combo-I vs. Combo-C	ns	0.9692
Vehicle-C vs. LY-PK-C	ns	0.9987
Vehicle-C vs. LY-EZ-C	***	0.0005
Vehicle-C vs. Combo-C	***	0.0002
LY-PK-C vs. LY-EZ-C	**	0.0027
LY-PK-C vs. Combo-C	**	0.0012
LY-EZ-C vs. Combo-C	ns	>0.9999
Statisitcal comparison of endpoint DKO tumor p-𝛾H2AX IHC staining
Tukey's multiple comparisons test	Summary	Adjusted P Value
Vehicle-I vs. LY-PK-I	ns	0.916
Vehicle-I vs. LY-EZ-I	ns	>0.9999
Vehicle-I vs. Combo-I	*	0.0485
Vehicle-I vs. Vehicle-C	ns	>0.9999
Vehicle-I vs. LY-PK-C	ns	0.7874
Vehicle-I vs. LY-EZ-C	ns	0.8927
Vehicle-I vs. Combo-C	***	0.0002
LY-PK-I vs. LY-EZ-I	ns	0.9807
LY-PK-I vs. Combo-I	ns	0.4847
LY-PK-I vs. Vehicle-C	ns	0.7463
LY-PK-I vs. LY-PK-C	ns	>0.9999
LY-PK-I vs. LY-EZ-C	ns	>0.9999
LY-PK-I vs. Combo-C	**	0.0072
LY-EZ-I vs. Combo-I	ns	0.0955
LY-EZ-I vs. Vehicle-C	ns	0.9972
LY-EZ-I vs. LY-PK-C	ns	0.9186
LY-EZ-I vs. LY-EZ-C	ns	0.9718
LY-EZ-I vs. Combo-C	***	0.0006
Combo-I vs. Vehicle-C	*	0.0198
Combo-I vs. LY-PK-C	ns	0.6714
Combo-I vs. LY-EZ-C	ns	0.5263
Combo-I vs. Combo-C	ns	0.5031
Vehicle-C vs. LY-PK-C	ns	0.5634
Vehicle-C vs. LY-EZ-C	ns	0.7071
Vehicle-C vs. Combo-C	****	<0.0001
LY-PK-C vs. LY-EZ-C	ns	>0.9999
LY-PK-C vs. Combo-C	*	0.0156
LY-EZ-C vs. Combo-C	**	0.0086
Statisitcal comparison of endpoint DKO tumor Ki67 IHC staining
Tukey's multiple comparisons test	Summary	Adjusted P Value
Vehicle-I vs. LY-PK-I	****	<0.0001
Vehicle-I vs. LY-EZ-I	ns	0.4044
Vehicle-I vs. Combo-I	****	<0.0001
Vehicle-I vs. Vehicle-C	ns	0.8281
Vehicle-I vs. LY-PK-C	****	<0.0001
Vehicle-I vs. LY-EZ-C	****	<0.0001
Vehicle-I vs. Combo-C	****	<0.0001
LY-PK-I vs. LY-EZ-I	***	0.0006
LY-PK-I vs. Combo-I	ns	0.664
LY-PK-I vs. Vehicle-C	****	<0.0001
LY-PK-I vs. LY-PK-C	ns	>0.9999
LY-PK-I vs. LY-EZ-C	ns	0.9148
LY-PK-I vs. Combo-C	ns	0.0531
LY-EZ-I vs. Combo-I	****	<0.0001
LY-EZ-I vs. Vehicle-C	*	0.0208
LY-EZ-I vs. LY-PK-C	**	0.0012
LY-EZ-I vs. LY-EZ-C	*	0.0159
LY-EZ-I vs. Combo-C	****	<0.0001
Combo-I vs. Vehicle-C	****	<0.0001
Combo-I vs. LY-PK-C	ns	0.4851
Combo-I vs. LY-EZ-C	ns	0.0908
Combo-I vs. Combo-C	ns	0.814
Vehicle-C vs. LY-PK-C	****	<0.0001
Vehicle-C vs. LY-EZ-C	****	<0.0001
Vehicle-C vs. Combo-C	****	<0.0001
LY-PK-C vs. LY-EZ-C	ns	0.9778
LY-PK-C vs. Combo-C	*	0.0271
LY-EZ-C vs. Combo-C	**	0.0022

## Sheet: Table S5
Supplement Table 5:Bliss synergy landscapes for LY-PK and LY-EZ or EPZ6438 drug combinations
Pten:Rb1 KO CSS_EPZ								Pten:Rb1 KO CSS_LY-EZ								Pten:Rb1 KO FBS_EPZ								Pten:Rb1 KO FBS_LY-EZ								Pten:Rb1:Zfp36 KO CSS_EPZ								Pten:Rb1:Zfp36 KO CSS_LY-EZ								Pten:Rb1:zfp36 KO FBS_EPZ
PairIndex	Drug1	Drug2	Conc1	Conc2	Response	ConcUnit		PairIndex	Drug1	Drug2	Conc1	Conc2	Response	ConcUnit		PairIndex	Drug1	Drug2	Conc1	Conc2	Response	ConcUnit		PairIndex	Drug1	Drug2	Conc1	Conc2	Response	ConcUnit		PairIndex	Drug1	Drug2	Conc1	Conc2	Response	ConcUnit		PairIndex	Drug1	Drug2	Conc1	Conc2	Response	ConcUnit		PairIndex	Drug1
1	LY-PK	EPZ	0	0	100	nM		1	LY-PK	LY-EZ	0	0	100	nM		1	LY-PK	EPZ	0	0	100	nM		1	LY-PK	LY-EZ	0	0	100	nM		1	LY-PK	EPZ	0	0	100	nM		1	LY-PK	LY-EZ	0	0	100	nM		1	LY-PK
1	LY-PK	EPZ	0	12.5	102.486	nM		1	LY-PK	LY-EZ	0	12.5	94.6623	nM		1	LY-PK	EPZ	0	12.5	91.5862	nM		1	LY-PK	LY-EZ	0	12.5	96.9728	nM		1	LY-PK	EPZ	0	12.5	95.7427	nM		1	LY-PK	LY-EZ	0	12.5	102.601	nM		1	LY-PK
1	LY-PK	EPZ	0	25	96.7257	nM		1	LY-PK	LY-EZ	0	25	84.1856	nM		1	LY-PK	EPZ	0	25	87.5877	nM		1	LY-PK	LY-EZ	0	25	97.1595	nM		1	LY-PK	EPZ	0	25	94.9928	nM		1	LY-PK	LY-EZ	0	25	102.275	nM		1	LY-PK
1	LY-PK	EPZ	0	50	99.3563	nM		1	LY-PK	LY-EZ	0	50	81.5463	nM		1	LY-PK	EPZ	0	50	83.5213	nM		1	LY-PK	LY-EZ	0	50	96.4052	nM		1	LY-PK	EPZ	0	50	95.3354	nM		1	LY-PK	LY-EZ	0	50	91.8114	nM		1	LY-PK
1	LY-PK	EPZ	0	100	95.5935	nM		1	LY-PK	LY-EZ	0	100	78.8986	nM		1	LY-PK	EPZ	0	100	87.147	nM		1	LY-PK	LY-EZ	0	100	95.0751	nM		1	LY-PK	EPZ	0	100	94.8458	nM		1	LY-PK	LY-EZ	0	100	87.6868	nM		1	LY-PK
1	LY-PK	EPZ	0	200	94.2224	nM		1	LY-PK	LY-EZ	0	200	65.4084	nM		1	LY-PK	EPZ	0	200	84.6846	nM		1	LY-PK	LY-EZ	0	200	93.7092	nM		1	LY-PK	EPZ	0	200	94.6671	nM		1	LY-PK	LY-EZ	0	200	94.7919	nM		1	LY-PK
1	LY-PK	EPZ	12.5	0	89.319	nM		1	LY-PK	LY-EZ	12.5	0	91.1411	nM		1	LY-PK	EPZ	12.5	0	82.501	nM		1	LY-PK	LY-EZ	12.5	0	77.3095	nM		1	LY-PK	EPZ	12.5	0	98.6097	nM		1	LY-PK	LY-EZ	12.5	0	90.505	nM		1	LY-PK
1	LY-PK	EPZ	12.5	12.5	88.1967	nM		1	LY-PK	LY-EZ	12.5	12.5	87.7057	nM		1	LY-PK	EPZ	12.5	12.5	81.9313	nM		1	LY-PK	LY-EZ	12.5	12.5	78.9615	nM		1	LY-PK	EPZ	12.5	12.5	93.8829	nM		1	LY-PK	LY-EZ	12.5	12.5	87.3573	nM		1	LY-PK
1	LY-PK	EPZ	12.5	25	83.0674	nM		1	LY-PK	LY-EZ	12.5	25	84.137	nM		1	LY-PK	EPZ	12.5	25	78.2427	nM		1	LY-PK	LY-EZ	12.5	25	74.743	nM		1	LY-PK	EPZ	12.5	25	93.215	nM		1	LY-PK	LY-EZ	12.5	25	84.6378	nM		1	LY-PK
1	LY-PK	EPZ	12.5	50	77.8508	nM		1	LY-PK	LY-EZ	12.5	50	81.3803	nM		1	LY-PK	EPZ	12.5	50	81.5288	nM		1	LY-PK	LY-EZ	12.5	50	72.2725	nM		1	LY-PK	EPZ	12.5	50	92.5362	nM		1	LY-PK	LY-EZ	12.5	50	84.5164	nM		1	LY-PK
1	LY-PK	EPZ	12.5	100	76.8517	nM		1	LY-PK	LY-EZ	12.5	100	72.1609	nM		1	LY-PK	EPZ	12.5	100	79.71	nM		1	LY-PK	LY-EZ	12.5	100	71.5801	nM		1	LY-PK	EPZ	12.5	100	92.4061	nM		1	LY-PK	LY-EZ	12.5	100	83.7122	nM		1	LY-PK
1	LY-PK	EPZ	12.5	200	71.9025	nM		1	LY-PK	LY-EZ	12.5	200	58.29	nM		1	LY-PK	EPZ	12.5	200	76.4305	nM		1	LY-PK	LY-EZ	12.5	200	71.0149	nM		1	LY-PK	EPZ	12.5	200	91.762	nM		1	LY-PK	LY-EZ	12.5	200	89.1	nM		1	LY-PK
1	LY-PK	EPZ	25	0	77.1142	nM		1	LY-PK	LY-EZ	25	0	90.5363	nM		1	LY-PK	EPZ	25	0	67.1311	nM		1	LY-PK	LY-EZ	25	0	73.4176	nM		1	LY-PK	EPZ	25	0	96.5631	nM		1	LY-PK	LY-EZ	25	0	89.8934	nM		1	LY-PK
1	LY-PK	EPZ	25	12.5	74.7876	nM		1	LY-PK	LY-EZ	25	12.5	89.6291	nM		1	LY-PK	EPZ	25	12.5	63.6001	nM		1	LY-PK	LY-EZ	25	12.5	72.3886	nM		1	LY-PK	EPZ	25	12.5	96.2603	nM		1	LY-PK	LY-EZ	25	12.5	88.7057	nM		1	LY-PK
1	LY-PK	EPZ	25	25	71.0266	nM		1	LY-PK	LY-EZ	25	25	75.24	nM		1	LY-PK	EPZ	25	25	60.9991	nM		1	LY-PK	LY-EZ	25	25	71.147	nM		1	LY-PK	EPZ	25	25	93.9383	nM		1	LY-PK	LY-EZ	25	25	88.6911	nM		1	LY-PK
1	LY-PK	EPZ	25	50	75.186	nM		1	LY-PK	LY-EZ	25	50	74.742	nM		1	LY-PK	EPZ	25	50	67.1999	nM		1	LY-PK	LY-EZ	25	50	66.4703	nM		1	LY-PK	EPZ	25	50	92.1894	nM		1	LY-PK	LY-EZ	25	50	88.3168	nM		1	LY-PK
1	LY-PK	EPZ	25	100	69.4985	nM		1	LY-PK	LY-EZ	25	100	69.491	nM		1	LY-PK	EPZ	25	100	64.0784	nM		1	LY-PK	LY-EZ	25	100	66.3818	nM		1	LY-PK	EPZ	25	100	96.0299	nM		1	LY-PK	LY-EZ	25	100	85.655	nM		1	LY-PK
1	LY-PK	EPZ	25	200	65.0797	nM		1	LY-PK	LY-EZ	25	200	47.716	nM		1	LY-PK	EPZ	25	200	64.4146	nM		1	LY-PK	LY-EZ	25	200	65.1897	nM		1	LY-PK	EPZ	25	200	91.3319	nM		1	LY-PK	LY-EZ	25	200	78.4674	nM		1	LY-PK
1	LY-PK	EPZ	50	0	67.8138	nM		1	LY-PK	LY-EZ	50	0	84.7132	nM		1	LY-PK	EPZ	50	0	56.9187	nM		1	LY-PK	LY-EZ	50	0	64.772	nM		1	LY-PK	EPZ	50	0	89.3975	nM		1	LY-PK	LY-EZ	50	0	76.0257	nM		1	LY-PK
1	LY-PK	EPZ	50	12.5	62.5803	nM		1	LY-PK	LY-EZ	50	12.5	82.8194	nM		1	LY-PK	EPZ	50	12.5	56.7421	nM		1	LY-PK	LY-EZ	50	12.5	63.1395	nM		1	LY-PK	EPZ	50	12.5	90.5486	nM		1	LY-PK	LY-EZ	50	12.5	81.9215	nM		1	LY-PK
1	LY-PK	EPZ	50	25	64.9308	nM		1	LY-PK	LY-EZ	50	25	79.3374	nM		1	LY-PK	EPZ	50	25	57.7601	nM		1	LY-PK	LY-EZ	50	25	62.6499	nM		1	LY-PK	EPZ	50	25	86.7319	nM		1	LY-PK	LY-EZ	50	25	81.8433	nM		1	LY-PK
1	LY-PK	EPZ	50	50	60.1158	nM		1	LY-PK	LY-EZ	50	50	66.6117	nM		1	LY-PK	EPZ	50	50	56.363	nM		1	LY-PK	LY-EZ	50	50	61.1715	nM		1	LY-PK	EPZ	50	50	87.4795	nM		1	LY-PK	LY-EZ	50	50	82.2365	nM		1	LY-PK
1	LY-PK	EPZ	50	100	57.4978	nM		1	LY-PK	LY-EZ	50	100	63.2301	nM		1	LY-PK	EPZ	50	100	56.642	nM		1	LY-PK	LY-EZ	50	100	60.8851	nM		1	LY-PK	EPZ	50	100	86.2225	nM		1	LY-PK	LY-EZ	50	100	76.5311	nM		1	LY-PK
1	LY-PK	EPZ	50	200	56.4262	nM		1	LY-PK	LY-EZ	50	200	35.7326	nM		1	LY-PK	EPZ	50	200	56.1731	nM		1	LY-PK	LY-EZ	50	200	59.9826	nM		1	LY-PK	EPZ	50	200	86.0828	nM		1	LY-PK	LY-EZ	50	200	76.6077	nM		1	LY-PK
1	LY-PK	EPZ	100	0	60.4269	nM		1	LY-PK	LY-EZ	100	0	81.6108	nM		1	LY-PK	EPZ	100	0	51.2483	nM		1	LY-PK	LY-EZ	100	0	55.4478	nM		1	LY-PK	EPZ	100	0	85.6875	nM		1	LY-PK	LY-EZ	100	0	68.8608	nM		1	LY-PK
1	LY-PK	EPZ	100	12.5	56.6011	nM		1	LY-PK	LY-EZ	100	12.5	81.1784	nM		1	LY-PK	EPZ	100	12.5	50.2666	nM		1	LY-PK	LY-EZ	100	12.5	54.2721	nM		1	LY-PK	EPZ	100	12.5	85.1896	nM		1	LY-PK	LY-EZ	100	12.5	72.1655	nM		1	LY-PK
1	LY-PK	EPZ	100	25	56.1186	nM		1	LY-PK	LY-EZ	100	25	78.0199	nM		1	LY-PK	EPZ	100	25	50.1412	nM		1	LY-PK	LY-EZ	100	25	52.3612	nM		1	LY-PK	EPZ	100	25	80.5461	nM		1	LY-PK	LY-EZ	100	25	66.4482	nM		1	LY-PK
1	LY-PK	EPZ	100	50	55.1927	nM		1	LY-PK	LY-EZ	100	50	65.6156	nM		1	LY-PK	EPZ	100	50	50.3201	nM		1	LY-PK	LY-EZ	100	50	52.11	nM		1	LY-PK	EPZ	100	50	85.0064	nM		1	LY-PK	LY-EZ	100	50	69.5765	nM		1	LY-PK
1	LY-PK	EPZ	100	100	51.0544	nM		1	LY-PK	LY-EZ	100	100	62.5185	nM		1	LY-PK	EPZ	100	100	51.9414	nM		1	LY-PK	LY-EZ	100	100	51.1321	nM		1	LY-PK	EPZ	100	100	82.1773	nM		1	LY-PK	LY-EZ	100	100	73.8116	nM		1	LY-PK
1	LY-PK	EPZ	100	200	46.7837	nM		1	LY-PK	LY-EZ	100	200	33.475	nM		1	LY-PK	EPZ	100	200	48.4776	nM		1	LY-PK	LY-EZ	100	200	51.2208	nM		1	LY-PK	EPZ	100	200	81.6212	nM		1	LY-PK	LY-EZ	100	200	71.4136	nM		1	LY-PK
1	LY-PK	EPZ	200	0	45.4591	nM		1	LY-PK	LY-EZ	200	0	74.6236	nM		1	LY-PK	EPZ	200	0	48.8232	nM		1	LY-PK	LY-EZ	200	0	45.8872	nM		1	LY-PK	EPZ	200	0	74.5779	nM		1	LY-PK	LY-EZ	200	0	64.6338	nM		1	LY-PK
1	LY-PK	EPZ	200	12.5	44.2034	nM		1	LY-PK	LY-EZ	200	12.5	73.1771	nM		1	LY-PK	EPZ	200	12.5	46.9611	nM		1	LY-PK	LY-EZ	200	12.5	44.3801	nM		1	LY-PK	EPZ	200	12.5	74.4144	nM		1	LY-PK	LY-EZ	200	12.5	67.3927	nM		1	LY-PK
1	LY-PK	EPZ	200	25	38.7046	nM		1	LY-PK	LY-EZ	200	25	69.6263	nM		1	LY-PK	EPZ	200	25	45.8832	nM		1	LY-PK	LY-EZ	200	25	43.0808	nM		1	LY-PK	EPZ	200	25	74.386	nM		1	LY-PK	LY-EZ	200	25	62.9116	nM		1	LY-PK
1	LY-PK	EPZ	200	50	38.0876	nM		1	LY-PK	LY-EZ	200	50	65.309	nM		1	LY-PK	EPZ	200	50	45.3325	nM		1	LY-PK	LY-EZ	200	50	42.2093	nM		1	LY-PK	EPZ	200	50	73.1602	nM		1	LY-PK	LY-EZ	200	50	63.4429	nM		1	LY-PK
1	LY-PK	EPZ	200	100	34.3178	nM		1	LY-PK	LY-EZ	200	100	59.5462	nM		1	LY-PK	EPZ	200	100	43.8579	nM		1	LY-PK	LY-EZ	200	100	41.2932	nM		1	LY-PK	EPZ	200	100	72.6696	nM		1	LY-PK	LY-EZ	200	100	59.4505	nM		1	LY-PK
1	LY-PK	EPZ	200	200	28.5912	nM		1	LY-PK	LY-EZ	200	200	31.7494	nM		1	LY-PK	EPZ	200	200	43.0893	nM		1	LY-PK	LY-EZ	200	200	41.2061	nM		1	LY-PK	EPZ	200	200	71.9243	nM		1	LY-PK	LY-EZ	200	200	58.7612	nM		1	LY-PK
2	LY-PK	EPZ	0	0	100	nM		2	LY-PK	LY-EZ	0	0	100	nM		2	LY-PK	EPZ	0	0	100	nM		2	LY-PK	LY-EZ	0	0	100	nM		2	LY-PK	EPZ	0	0	100	nM		2	LY-PK	LY-EZ	0	0	100	nM		2	LY-PK
2	LY-PK	EPZ	0	12.5	96.3778	nM		2	LY-PK	LY-EZ	0	12.5	97.4992	nM		2	LY-PK	EPZ	0	12.5	96.7818	nM		2	LY-PK	LY-EZ	0	12.5	97.4868	nM		2	LY-PK	EPZ	0	12.5	97.2659	nM		2	LY-PK	LY-EZ	0	12.5	102.601	nM		2	LY-PK
2	LY-PK	EPZ	0	25	92.8716	nM		2	LY-PK	LY-EZ	0	25	96.1278	nM		2	LY-PK	EPZ	0	25	94.2663	nM		2	LY-PK	LY-EZ	0	25	97.0968	nM		2	LY-PK	EPZ	0	25	100.709	nM		2	LY-PK	LY-EZ	0	25	106.428	nM		2	LY-PK
2	LY-PK	EPZ	0	50	88.0986	nM		2	LY-PK	LY-EZ	0	50	92.7693	nM		2	LY-PK	EPZ	0	50	91.8477	nM		2	LY-PK	LY-EZ	0	50	99.2127	nM		2	LY-PK	EPZ	0	50	96.8633	nM		2	LY-PK	LY-EZ	0	50	98.8797	nM		2	LY-PK
2	LY-PK	EPZ	0	100	85.6523	nM		2	LY-PK	LY-EZ	0	100	76.3151	nM		2	LY-PK	EPZ	0	100	90.0965	nM		2	LY-PK	LY-EZ	0	100	96.5819	nM		2	LY-PK	EPZ	0	100	96.3373	nM		2	LY-PK	LY-EZ	0	100	94.7917	nM		2	LY-PK
2	LY-PK	EPZ	0	200	80.7125	nM		2	LY-PK	LY-EZ	0	200	73.5675	nM		2	LY-PK	EPZ	0	200	86.7614	nM		2	LY-PK	LY-EZ	0	200	95.2025	nM		2	LY-PK	EPZ	0	200	96.1709	nM		2	LY-PK	LY-EZ	0	200	87.6864	nM		2	LY-PK
2	LY-PK	EPZ	12.5	0	81.4993	nM		2	LY-PK	LY-EZ	12.5	0	91.5919	nM		2	LY-PK	EPZ	12.5	0	87.881	nM		2	LY-PK	LY-EZ	12.5	0	77.0362	nM		2	LY-PK	EPZ	12.5	0	99.8549	nM		2	LY-PK	LY-EZ	12.5	0	89.4259	nM		2	LY-PK
2	LY-PK	EPZ	12.5	12.5	77.1597	nM		2	LY-PK	LY-EZ	12.5	12.5	89.8063	nM		2	LY-PK	EPZ	12.5	12.5	84.8204	nM		2	LY-PK	LY-EZ	12.5	12.5	76.4394	nM		2	LY-PK	EPZ	12.5	12.5	98.9561	nM		2	LY-PK	LY-EZ	12.5	12.5	90.0311	nM		2	LY-PK
2	LY-PK	EPZ	12.5	25	75.3719	nM		2	LY-PK	LY-EZ	12.5	25	81.943	nM		2	LY-PK	EPZ	12.5	25	83.9446	nM		2	LY-PK	LY-EZ	12.5	25	74.1384	nM		2	LY-PK	EPZ	12.5	25	99.2375	nM		2	LY-PK	LY-EZ	12.5	25	94.0689	nM		2	LY-PK
2	LY-PK	EPZ	12.5	50	73.8007	nM		2	LY-PK	LY-EZ	12.5	50	78.1762	nM		2	LY-PK	EPZ	12.5	50	82.9728	nM		2	LY-PK	LY-EZ	12.5	50	74.2743	nM		2	LY-PK	EPZ	12.5	50	98.3706	nM		2	LY-PK	LY-EZ	12.5	50	84.5158	nM		2	LY-PK
2	LY-PK	EPZ	12.5	100	72.9115	nM		2	LY-PK	LY-EZ	12.5	100	70.0582	nM		2	LY-PK	EPZ	12.5	100	81.0913	nM		2	LY-PK	LY-EZ	12.5	100	72.7381	nM		2	LY-PK	EPZ	12.5	100	97.5246	nM		2	LY-PK	LY-EZ	12.5	100	83.7116	nM		2	LY-PK
2	LY-PK	EPZ	12.5	200	71.4873	nM		2	LY-PK	LY-EZ	12.5	200	64.6722	nM		2	LY-PK	EPZ	12.5	200	80.2964	nM		2	LY-PK	LY-EZ	12.5	200	71.9996	nM		2	LY-PK	EPZ	12.5	200	96.9028	nM		2	LY-PK	LY-EZ	12.5	200	87.3568	nM		2	LY-PK
2	LY-PK	EPZ	25	0	77.0926	nM		2	LY-PK	LY-EZ	25	0	77.5887	nM		2	LY-PK	EPZ	25	0	74.8684	nM		2	LY-PK	LY-EZ	25	0	66.0993	nM		2	LY-PK	EPZ	25	0	97.5637	nM		2	LY-PK	LY-EZ	25	0	84.4991	nM		2	LY-PK
2	LY-PK	EPZ	25	12.5	72.2404	nM		2	LY-PK	LY-EZ	25	12.5	65.9626	nM		2	LY-PK	EPZ	25	12.5	73.2245	nM		2	LY-PK	LY-EZ	25	12.5	64.9613	nM		2	LY-PK	EPZ	25	12.5	97.0346	nM		2	LY-PK	LY-EZ	25	12.5	85.6723	nM		2	LY-PK
2	LY-PK	EPZ	25	25	71.6183	nM		2	LY-PK	LY-EZ	25	25	62.9794	nM		2	LY-PK	EPZ	25	25	70.4869	nM		2	LY-PK	LY-EZ	25	25	64.2087	nM		2	LY-PK	EPZ	25	25	97.9112	nM		2	LY-PK	LY-EZ	25	25	83.2968	nM		2	LY-PK
2	LY-PK	EPZ	25	50	67.4473	nM		2	LY-PK	LY-EZ	25	50	59.4193	nM		2	LY-PK	EPZ	25	50	69.5959	nM		2	LY-PK	LY-EZ	25	50	63.0915	nM		2	LY-PK	EPZ	25	50	97.2876	nM		2	LY-PK	LY-EZ	25	50	85.5261	nM		2	LY-PK
2	LY-PK	EPZ	25	100	64.8975	nM		2	LY-PK	LY-EZ	25	100	52.623	nM		2	LY-PK	EPZ	25	100	68.2426	nM		2	LY-PK	LY-EZ	25	100	63.01	nM		2	LY-PK	EPZ	25	100	97.8336	nM		2	LY-PK	LY-EZ	25	100	85.5272	nM		2	LY-PK
2	LY-PK	EPZ	25	200	63.4427	nM		2	LY-PK	LY-EZ	25	200	51.026	nM		2	LY-PK	EPZ	25	200	65.7089	nM		2	LY-PK	LY-EZ	25	200	61.2698	nM		2	LY-PK	EPZ	25	200	95.751	nM		2	LY-PK	LY-EZ	25	200	85.5186	nM		2	LY-PK
2	LY-PK	EPZ	50	0	73.1703	nM		2	LY-PK	LY-EZ	50	0	71.9103	nM		2	LY-PK	EPZ	50	0	67.7638	nM		2	LY-PK	LY-EZ	50	0	59.1655	nM		2	LY-PK	EPZ	50	0	89.8358	nM		2	LY-PK	LY-EZ	50	0	78.6565	nM		2	LY-PK
2	LY-PK	EPZ	50	12.5	72.2317	nM		2	LY-PK	LY-EZ	50	12.5	64.6591	nM		2	LY-PK	EPZ	50	12.5	65.1359	nM		2	LY-PK	LY-EZ	50	12.5	57.4247	nM		2	LY-PK	EPZ	50	12.5	89.2375	nM		2	LY-PK	LY-EZ	50	12.5	76.575	nM		2	LY-PK
2	LY-PK	EPZ	50	25	67.4465	nM		2	LY-PK	LY-EZ	50	25	63.6217	nM		2	LY-PK	EPZ	50	25	63.6487	nM		2	LY-PK	LY-EZ	50	25	57.1887	nM		2	LY-PK	EPZ	50	25	89.5424	nM		2	LY-PK	LY-EZ	50	25	76.2924	nM		2	LY-PK
2	LY-PK	EPZ	50	50	64.5052	nM		2	LY-PK	LY-EZ	50	50	58.6922	nM		2	LY-PK	EPZ	50	50	63.4527	nM		2	LY-PK	LY-EZ	50	50	55.514	nM		2	LY-PK	EPZ	50	50	88.4905	nM		2	LY-PK	LY-EZ	50	50	82.2353	nM		2	LY-PK
2	LY-PK	EPZ	50	100	60.1911	nM		2	LY-PK	LY-EZ	50	100	53.246	nM		2	LY-PK	EPZ	50	100	63.1161	nM		2	LY-PK	LY-EZ	50	100	55.1052	nM		2	LY-PK	EPZ	50	100	95.8846	nM		2	LY-PK	LY-EZ	50	100	80.1047	nM		2	LY-PK
2	LY-PK	EPZ	50	200	57.6793	nM		2	LY-PK	LY-EZ	50	200	49.7909	nM		2	LY-PK	EPZ	50	200	62.0619	nM		2	LY-PK	LY-EZ	50	200	54.5007	nM		2	LY-PK	EPZ	50	200	88.2952	nM		2	LY-PK	LY-EZ	50	200	82.2898	nM		2	LY-PK
2	LY-PK	EPZ	100	0	59.4055	nM		2	LY-PK	LY-EZ	100	0	61.1456	nM		2	LY-PK	EPZ	100	0	52.6243	nM		2	LY-PK	LY-EZ	100	0	58.0887	nM		2	LY-PK	EPZ	100	0	87.8207	nM		2	LY-PK	LY-EZ	100	0	69.9379	nM		2	LY-PK
2	LY-PK	EPZ	100	12.5	56.0962	nM		2	LY-PK	LY-EZ	100	12.5	59.5076	nM		2	LY-PK	EPZ	100	12.5	51.0854	nM		2	LY-PK	LY-EZ	100	12.5	57.2323	nM		2	LY-PK	EPZ	100	12.5	86.9805	nM		2	LY-PK	LY-EZ	100	12.5	71.6288	nM		2	LY-PK
2	LY-PK	EPZ	100	25	53.3036	nM		2	LY-PK	LY-EZ	100	25	55.0625	nM		2	LY-PK	EPZ	100	25	50.2108	nM		2	LY-PK	LY-EZ	100	25	57.6278	nM		2	LY-PK	EPZ	100	25	82.4621	nM		2	LY-PK	LY-EZ	100	25	66.4583	nM		2	LY-PK
2	LY-PK	EPZ	100	50	47.1875	nM		2	LY-PK	LY-EZ	100	50	49.1407	nM		2	LY-PK	EPZ	100	50	49.3205	nM		2	LY-PK	LY-EZ	100	50	56.0442	nM		2	LY-PK	EPZ	100	50	80.9699	nM		2	LY-PK	LY-EZ	100	50	70.7022	nM		2	LY-PK
2	LY-PK	EPZ	100	100	46.5054	nM		2	LY-PK	LY-EZ	100	100	46.4082	nM		2	LY-PK	EPZ	100	100	48.1869	nM		2	LY-PK	LY-EZ	100	100	54.4269	nM		2	LY-PK	EPZ	100	100	83.9774	nM		2	LY-PK	LY-EZ	100	100	67.5004	nM		2	LY-PK
2	LY-PK	EPZ	100	200	44.0054	nM		2	LY-PK	LY-EZ	100	200	41.2107	nM		2	LY-PK	EPZ	100	200	47.6498	nM		2	LY-PK	LY-EZ	100	200	52.6269	nM		2	LY-PK	EPZ	100	200	84.0693	nM		2	LY-PK	LY-EZ	100	200	66.2388	nM		2	LY-PK
2	LY-PK	EPZ	200	0	54.4955	nM		2	LY-PK	LY-EZ	200	0	54.2607	nM		2	LY-PK	EPZ	200	0	45.1308	nM		2	LY-PK	LY-EZ	200	0	55.0537	nM		2	LY-PK	EPZ	200	0	72.2633	nM		2	LY-PK	LY-EZ	200	0	64.694	nM		2	LY-PK
2	LY-PK	EPZ	200	12.5	52.6042	nM		2	LY-PK	LY-EZ	200	12.5	53.5503	nM		2	LY-PK	EPZ	200	12.5	44.8447	nM		2	LY-PK	LY-EZ	200	12.5	54.2849	nM		2	LY-PK	EPZ	200	12.5	75.0685	nM		2	LY-PK	LY-EZ	200	12.5	65.4119	nM		2	LY-PK
2	LY-PK	EPZ	200	25	51.8923	nM		2	LY-PK	LY-EZ	200	25	50.0569	nM		2	LY-PK	EPZ	200	25	44.3293	nM		2	LY-PK	LY-EZ	200	25	52.5224	nM		2	LY-PK	EPZ	200	25	70.9544	nM		2	LY-PK	LY-EZ	200	25	67.1622	nM		2	LY-PK
2	LY-PK	EPZ	200	50	46.9337	nM		2	LY-PK	LY-EZ	200	50	44.1053	nM		2	LY-PK	EPZ	200	50	43.0307	nM		2	LY-PK	LY-EZ	200	50	52.4689	nM		2	LY-PK	EPZ	200	50	71.9145	nM		2	LY-PK	LY-EZ	200	50	63.4431	nM		2	LY-PK
2	LY-PK	EPZ	200	100	44.5592	nM		2	LY-PK	LY-EZ	200	100	39.119	nM		2	LY-PK	EPZ	200	100	42.4101	nM		2	LY-PK	LY-EZ	200	100	51.3564	nM		2	LY-PK	EPZ	200	100	76.5261	nM		2	LY-PK	LY-EZ	200	100	64.8034	nM		2	LY-PK
2	LY-PK	EPZ	200	200	42.1034	nM		2	LY-PK	LY-EZ	200	200	34.5677	nM		2	LY-PK	EPZ	200	200	42.0951	nM		2	LY-PK	LY-EZ	200	200	50.4168	nM		2	LY-PK	EPZ	200	200	72.0108	nM		2	LY-PK	LY-EZ	200	200	65.448	nM		2	LY-PK
3	LY-PK	EPZ	0	0	100	nM		3	LY-PK	LY-EZ	0	0	100	nM		3	LY-PK	EPZ	0	0	100	nM		3	LY-PK	LY-EZ	0	0	100	nM		3	LY-PK	EPZ	0	0	100	nM		3	LY-PK	LY-EZ	0	0	100	nM		3	LY-PK
3	LY-PK	EPZ	0	12.5	96.7611	nM		3	LY-PK	LY-EZ	0	12.5	94.3978	nM		3	LY-PK	EPZ	0	12.5	93.6185	nM		3	LY-PK	LY-EZ	0	12.5	99.3916	nM		3	LY-PK	EPZ	0	12.5	97.1326	nM		3	LY-PK	LY-EZ	0	12.5	84.675	nM		3	LY-PK
3	LY-PK	EPZ	0	25	93.8856	nM		3	LY-PK	LY-EZ	0	25	94.0106	nM		3	LY-PK	EPZ	0	25	88.748	nM		3	LY-PK	LY-EZ	0	25	96.6411	nM		3	LY-PK	EPZ	0	25	93.7408	nM		3	LY-PK	LY-EZ	0	25	79.1937	nM		3	LY-PK
3	LY-PK	EPZ	0	50	91.6313	nM		3	LY-PK	LY-EZ	0	50	89.6801	nM		3	LY-PK	EPZ	0	50	85.3547	nM		3	LY-PK	LY-EZ	0	50	100.634	nM		3	LY-PK	EPZ	0	50	92.096	nM		3	LY-PK	LY-EZ	0	50	80.6675	nM		3	LY-PK
3	LY-PK	EPZ	0	100	90.2856	nM		3	LY-PK	LY-EZ	0	100	89.3993	nM		3	LY-PK	EPZ	0	100	83.4061	nM		3	LY-PK	LY-EZ	0	100	92.822	nM		3	LY-PK	EPZ	0	100	92.3785	nM		3	LY-PK	LY-EZ	0	100	77.6656	nM		3	LY-PK
3	LY-PK	EPZ	0	200	89.9282	nM		3	LY-PK	LY-EZ	0	200	82.5933	nM		3	LY-PK	EPZ	0	200	82.3481	nM		3	LY-PK	LY-EZ	0	200	92.2128	nM		3	LY-PK	EPZ	0	200	93.2843	nM		3	LY-PK	LY-EZ	0	200	77.721	nM		3	LY-PK
3	LY-PK	EPZ	12.5	0	95.724	nM		3	LY-PK	LY-EZ	12.5	0	94.2472	nM		3	LY-PK	EPZ	12.5	0	89.9042	nM		3	LY-PK	LY-EZ	12.5	0	98.3677	nM		3	LY-PK	EPZ	12.5	0	101.792	nM		3	LY-PK	LY-EZ	12.5	0	76.2315	nM		3	LY-PK
3	LY-PK	EPZ	12.5	12.5	90.2053	nM		3	LY-PK	LY-EZ	12.5	12.5	90.0197	nM		3	LY-PK	EPZ	12.5	12.5	88.9885	nM		3	LY-PK	LY-EZ	12.5	12.5	95.7886	nM		3	LY-PK	EPZ	12.5	12.5	100.714	nM		3	LY-PK	LY-EZ	12.5	12.5	77.2544	nM		3	LY-PK
3	LY-PK	EPZ	12.5	25	88.5403	nM		3	LY-PK	LY-EZ	12.5	25	87.112	nM		3	LY-PK	EPZ	12.5	25	86.427	nM		3	LY-PK	LY-EZ	12.5	25	90.3066	nM		3	LY-PK	EPZ	12.5	25	99.4775	nM		3	LY-PK	LY-EZ	12.5	25	77.8281	nM		3	LY-PK
3	LY-PK	EPZ	12.5	50	84.4769	nM		3	LY-PK	LY-EZ	12.5	50	83.8592	nM		3	LY-PK	EPZ	12.5	50	85.397	nM		3	LY-PK	LY-EZ	12.5	50	89.9374	nM		3	LY-PK	EPZ	12.5	50	95.5872	nM		3	LY-PK	LY-EZ	12.5	50	75.8116	nM		3	LY-PK
3	LY-PK	EPZ	12.5	100	83.8322	nM		3	LY-PK	LY-EZ	12.5	100	79.9585	nM		3	LY-PK	EPZ	12.5	100	82.3887	nM		3	LY-PK	LY-EZ	12.5	100	88.7124	nM		3	LY-PK	EPZ	12.5	100	94.2728	nM		3	LY-PK	LY-EZ	12.5	100	75.2182	nM		3	LY-PK
3	LY-PK	EPZ	12.5	200	81.277	nM		3	LY-PK	LY-EZ	12.5	200	78.8223	nM		3	LY-PK	EPZ	12.5	200	81.8151	nM		3	LY-PK	LY-EZ	12.5	200	85.1449	nM		3	LY-PK	EPZ	12.5	200	91.7211	nM		3	LY-PK	LY-EZ	12.5	200	74.9369	nM		3	LY-PK
3	LY-PK	EPZ	25	0	85.8813	nM		3	LY-PK	LY-EZ	25	0	84.8994	nM		3	LY-PK	EPZ	25	0	78.2663	nM		3	LY-PK	LY-EZ	25	0	77.438	nM		3	LY-PK	EPZ	25	0	96.2857	nM		3	LY-PK	LY-EZ	25	0	78.9059	nM		3	LY-PK
3	LY-PK	EPZ	25	12.5	80.9674	nM		3	LY-PK	LY-EZ	25	12.5	78.5331	nM		3	LY-PK	EPZ	25	12.5	76.6928	nM		3	LY-PK	LY-EZ	25	12.5	76.6567	nM		3	LY-PK	EPZ	25	12.5	97.987	nM		3	LY-PK	LY-EZ	25	12.5	75.8061	nM		3	LY-PK
3	LY-PK	EPZ	25	25	79.1364	nM		3	LY-PK	LY-EZ	25	25	74.2512	nM		3	LY-PK	EPZ	25	25	73.8709	nM		3	LY-PK	LY-EZ	25	25	76.6534	nM		3	LY-PK	EPZ	25	25	98.184	nM		3	LY-PK	LY-EZ	25	25	74.7217	nM		3	LY-PK
3	LY-PK	EPZ	25	50	75.3675	nM		3	LY-PK	LY-EZ	25	50	71.5776	nM		3	LY-PK	EPZ	25	50	73.2084	nM		3	LY-PK	LY-EZ	25	50	75.8091	nM		3	LY-PK	EPZ	25	50	94.859	nM		3	LY-PK	LY-EZ	25	50	75.5568	nM		3	LY-PK
3	LY-PK	EPZ	25	100	72.5323	nM		3	LY-PK	LY-EZ	25	100	68.8796	nM		3	LY-PK	EPZ	25	100	67.9884	nM		3	LY-PK	LY-EZ	25	100	74.5543	nM		3	LY-PK	EPZ	25	100	93.5762	nM		3	LY-PK	LY-EZ	25	100	70.1374	nM		3	LY-PK
3	LY-PK	EPZ	25	200	67.9142	nM		3	LY-PK	LY-EZ	25	200	66.8353	nM		3	LY-PK	EPZ	25	200	66.0009	nM		3	LY-PK	LY-EZ	25	200	73.6521	nM		3	LY-PK	EPZ	25	200	90.6946	nM		3	LY-PK	LY-EZ	25	200	70.6187	nM		3	LY-PK
3	LY-PK	EPZ	50	0	71.9975	nM		3	LY-PK	LY-EZ	50	0	77.6129	nM		3	LY-PK	EPZ	50	0	66.1355	nM		3	LY-PK	LY-EZ	50	0	73.4923	nM		3	LY-PK	EPZ	50	0	93.0861	nM		3	LY-PK	LY-EZ	50	0	71.4716	nM		3	LY-PK
3	LY-PK	EPZ	50	12.5	69.3614	nM		3	LY-PK	LY-EZ	50	12.5	76.6631	nM		3	LY-PK	EPZ	50	12.5	62.3114	nM		3	LY-PK	LY-EZ	50	12.5	72.1009	nM		3	LY-PK	EPZ	50	12.5	92.6712	nM		3	LY-PK	LY-EZ	50	12.5	69.6719	nM		3	LY-PK
3	LY-PK	EPZ	50	25	64.5377	nM		3	LY-PK	LY-EZ	50	25	69.7855	nM		3	LY-PK	EPZ	50	25	60.3527	nM		3	LY-PK	LY-EZ	50	25	71.1962	nM		3	LY-PK	EPZ	50	25	94.8127	nM		3	LY-PK	LY-EZ	50	25	63.8997	nM		3	LY-PK
3	LY-PK	EPZ	50	50	61.2785	nM		3	LY-PK	LY-EZ	50	50	67.7183	nM		3	LY-PK	EPZ	50	50	59.1668	nM		3	LY-PK	LY-EZ	50	50	70.6483	nM		3	LY-PK	EPZ	50	50	91.3619	nM		3	LY-PK	LY-EZ	50	50	65.8207	nM		3	LY-PK
3	LY-PK	EPZ	50	100	58.1266	nM		3	LY-PK	LY-EZ	50	100	69.1328	nM		3	LY-PK	EPZ	50	100	53.758	nM		3	LY-PK	LY-EZ	50	100	69.7676	nM		3	LY-PK	EPZ	50	100	90.4031	nM		3	LY-PK	LY-EZ	50	100	60.1318	nM		3	LY-PK
3	LY-PK	EPZ	50	200	53.8751	nM		3	LY-PK	LY-EZ	50	200	63.6247	nM		3	LY-PK	EPZ	50	200	53.36	nM		3	LY-PK	LY-EZ	50	200	68.7677	nM		3	LY-PK	EPZ	50	200	88.5815	nM		3	LY-PK	LY-EZ	50	200	60.5278	nM		3	LY-PK
3	LY-PK	EPZ	100	0	62.2289	nM		3	LY-PK	LY-EZ	100	0	75.5018	nM		3	LY-PK	EPZ	100	0	49.3174	nM		3	LY-PK	LY-EZ	100	0	55.6757	nM		3	LY-PK	EPZ	100	0	90.7124	nM		3	LY-PK	LY-EZ	100	0	70.078	nM		3	LY-PK
3	LY-PK	EPZ	100	12.5	59.6695	nM		3	LY-PK	LY-EZ	100	12.5	73.768	nM		3	LY-PK	EPZ	100	12.5	45.5239	nM		3	LY-PK	LY-EZ	100	12.5	55.2544	nM		3	LY-PK	EPZ	100	12.5	90.4442	nM		3	LY-PK	LY-EZ	100	12.5	67.1874	nM		3	LY-PK
3	LY-PK	EPZ	100	25	54.7749	nM		3	LY-PK	LY-EZ	100	25	68.5444	nM		3	LY-PK	EPZ	100	25	44.5706	nM		3	LY-PK	LY-EZ	100	25	52.3698	nM		3	LY-PK	EPZ	100	25	90.4984	nM		3	LY-PK	LY-EZ	100	25	65.7141	nM		3	LY-PK
3	LY-PK	EPZ	100	50	53.2587	nM		3	LY-PK	LY-EZ	100	50	66.0761	nM		3	LY-PK	EPZ	100	50	42.7465	nM		3	LY-PK	LY-EZ	100	50	51.6124	nM		3	LY-PK	EPZ	100	50	90.2085	nM		3	LY-PK	LY-EZ	100	50	69.7252	nM		3	LY-PK
3	LY-PK	EPZ	100	100	49.6812	nM		3	LY-PK	LY-EZ	100	100	63.1591	nM		3	LY-PK	EPZ	100	100	42.1466	nM		3	LY-PK	LY-EZ	100	100	51.2052	nM		3	LY-PK	EPZ	100	100	90.5079	nM		3	LY-PK	LY-EZ	100	100	65.2938	nM		3	LY-PK
3	LY-PK	EPZ	100	200	45.0698	nM		3	LY-PK	LY-EZ	100	200	62.1492	nM		3	LY-PK	EPZ	100	200	41.1826	nM		3	LY-PK	LY-EZ	100	200	50.5579	nM		3	LY-PK	EPZ	100	200	88.3145	nM		3	LY-PK	LY-EZ	100	200	57.0462	nM		3	LY-PK
3	LY-PK	EPZ	200	0	60.9847	nM		3	LY-PK	LY-EZ	200	0	54.3662	nM		3	LY-PK	EPZ	200	0	42.3727	nM		3	LY-PK	LY-EZ	200	0	44.72	nM		3	LY-PK	EPZ	200	0	82.3725	nM		3	LY-PK	LY-EZ	200	0	48.5915	nM		3	LY-PK
3	LY-PK	EPZ	200	12.5	55.0314	nM		3	LY-PK	LY-EZ	200	12.5	52.3341	nM		3	LY-PK	EPZ	200	12.5	39.8954	nM		3	LY-PK	LY-EZ	200	12.5	44.134	nM		3	LY-PK	EPZ	200	12.5	81.3105	nM		3	LY-PK	LY-EZ	200	12.5	49.9662	nM		3	LY-PK
3	LY-PK	EPZ	200	25	49.4064	nM		3	LY-PK	LY-EZ	200	25	49.7707	nM		3	LY-PK	EPZ	200	25	38.9806	nM		3	LY-PK	LY-EZ	200	25	43.4337	nM		3	LY-PK	EPZ	200	25	79.7445	nM		3	LY-PK	LY-EZ	200	25	49.1778	nM		3	LY-PK
3	LY-PK	EPZ	200	50	47.2999	nM		3	LY-PK	LY-EZ	200	50	48.0262	nM		3	LY-PK	EPZ	200	50	38.5131	nM		3	LY-PK	LY-EZ	200	50	42.135	nM		3	LY-PK	EPZ	200	50	79.4439	nM		3	LY-PK	LY-EZ	200	50	45.9623	nM		3	LY-PK
3	LY-PK	EPZ	200	100	40.5583	nM		3	LY-PK	LY-EZ	200	100	43.8412	nM		3	LY-PK	EPZ	200	100	37.2615	nM		3	LY-PK	LY-EZ	200	100	40.6658	nM		3	LY-PK	EPZ	200	100	79.8339	nM		3	LY-PK	LY-EZ	200	100	44.8611	nM		3	LY-PK
3	LY-PK	EPZ	200	200	37.0636	nM		3	LY-PK	LY-EZ	200	200	38.6886	nM		3	LY-PK	EPZ	200	200	36.6091	nM		3	LY-PK	LY-EZ	200	200	41.0176	nM		3	LY-PK	EPZ	200	200	79.4399	nM		3	LY-PK	LY-EZ	200	200	45.3211	nM		3	LY-PK
Pten:Trp53 KO CSS_EPZ								Pten:Trp53 KO CSS_LY-EZ								Pten:Trp53 KO FBS_EPZ								Pten:Trp53 KO FBS_LY-EZ								Pten:Trp53:Zfp36 KO CSS_EPZ								Pten:Trp53:Zfp36 KO CSS_LY-EZ								Pten:Trp53:zfp36 KO FBS_EPZ
PairIndex	Drug1	Drug2	Conc1	Conc2	Response	ConcUnit		PairIndex	Drug1	Drug2	Conc1	Conc2	Response	ConcUnit		PairIndex	Drug1	Drug2	Conc1	Conc2	Response	ConcUnit		PairIndex	Drug1	Drug2	Conc1	Conc2	Response	ConcUnit		PairIndex	Drug1	Drug2	Conc1	Conc2	Response	ConcUnit		PairIndex	Drug1	Drug2	Conc1	Conc2	Response	ConcUnit		PairIndex	Drug1
1	LY-PK	EPZ	0	0	100	nM		1	LY-PK	LY-EZ	0	0	100	nM		1	LY-PK	EPZ	0	0	100	nM		1	LY-PK	LY-EZ	0	0	100	nM		1	LY-PK	EPZ	0	0	100	nM		1	LY-PK	LY-EZ	0	0	100	nM		1	LY-PK
1	LY-PK	EPZ	0	12.5	99.6132	nM		1	LY-PK	LY-EZ	0	12.5	94.3103	nM		1	LY-PK	EPZ	0	12.5	94.2564	nM		1	LY-PK	LY-EZ	0	12.5	80.2355	nM		1	LY-PK	EPZ	0	12.5	100.371	nM		1	LY-PK	LY-EZ	0	12.5	97.2947	nM		1	LY-PK
1	LY-PK	EPZ	0	25	93.4187	nM		1	LY-PK	LY-EZ	0	25	102.549	nM		1	LY-PK	EPZ	0	25	88.3237	nM		1	LY-PK	LY-EZ	0	25	73.3605	nM		1	LY-PK	EPZ	0	25	97.246	nM		1	LY-PK	LY-EZ	0	25	94.1206	nM		1	LY-PK
1	LY-PK	EPZ	0	50	77.5971	nM		1	LY-PK	LY-EZ	0	50	84.6792	nM		1	LY-PK	EPZ	0	50	84.9436	nM		1	LY-PK	LY-EZ	0	50	77.3357	nM		1	LY-PK	EPZ	0	50	95.1683	nM		1	LY-PK	LY-EZ	0	50	91.5242	nM		1	LY-PK
1	LY-PK	EPZ	0	100	75.9011	nM		1	LY-PK	LY-EZ	0	100	81.3524	nM		1	LY-PK	EPZ	0	100	83.0345	nM		1	LY-PK	LY-EZ	0	100	70.6841	nM		1	LY-PK	EPZ	0	100	95.2852	nM		1	LY-PK	LY-EZ	0	100	90.9662	nM		1	LY-PK
1	LY-PK	EPZ	0	200	72.4215	nM		1	LY-PK	LY-EZ	0	200	64.0292	nM		1	LY-PK	EPZ	0	200	76.6105	nM		1	LY-PK	LY-EZ	0	200	71.9551	nM		1	LY-PK	EPZ	0	200	91.2833	nM		1	LY-PK	LY-EZ	0	200	90.8601	nM		1	LY-PK
1	LY-PK	EPZ	12.5	0	99.0305	nM		1	LY-PK	LY-EZ	12.5	0	92.4803	nM		1	LY-PK	EPZ	12.5	0	96.9656	nM		1	LY-PK	LY-EZ	12.5	0	79.317	nM		1	LY-PK	EPZ	12.5	0	97.9596	nM		1	LY-PK	LY-EZ	12.5	0	87.5751	nM		1	LY-PK
1	LY-PK	EPZ	12.5	12.5	90.5041	nM		1	LY-PK	LY-EZ	12.5	12.5	82.0115	nM		1	LY-PK	EPZ	12.5	12.5	94.3656	nM		1	LY-PK	LY-EZ	12.5	12.5	65.3599	nM		1	LY-PK	EPZ	12.5	12.5	101.898	nM		1	LY-PK	LY-EZ	12.5	12.5	90.9294	nM		1	LY-PK
1	LY-PK	EPZ	12.5	25	84.0557	nM		1	LY-PK	LY-EZ	12.5	25	84.0711	nM		1	LY-PK	EPZ	12.5	25	88.76	nM		1	LY-PK	LY-EZ	12.5	25	58.6508	nM		1	LY-PK	EPZ	12.5	25	102.359	nM		1	LY-PK	LY-EZ	12.5	25	85.9916	nM		1	LY-PK
1	LY-PK	EPZ	12.5	50	75.0275	nM		1	LY-PK	LY-EZ	12.5	50	85.2176	nM		1	LY-PK	EPZ	12.5	50	79.5121	nM		1	LY-PK	LY-EZ	12.5	50	71.8821	nM		1	LY-PK	EPZ	12.5	50	94.86	nM		1	LY-PK	LY-EZ	12.5	50	84.5173	nM		1	LY-PK
1	LY-PK	EPZ	12.5	100	70.9004	nM		1	LY-PK	LY-EZ	12.5	100	90.2154	nM		1	LY-PK	EPZ	12.5	100	76.972	nM		1	LY-PK	LY-EZ	12.5	100	56.7723	nM		1	LY-PK	EPZ	12.5	100	93.9205	nM		1	LY-PK	LY-EZ	12.5	100	81.709	nM		1	LY-PK
1	LY-PK	EPZ	12.5	200	67.3678	nM		1	LY-PK	LY-EZ	12.5	200	75.614	nM		1	LY-PK	EPZ	12.5	200	72.5833	nM		1	LY-PK	LY-EZ	12.5	200	70.5859	nM		1	LY-PK	EPZ	12.5	200	92.8443	nM		1	LY-PK	LY-EZ	12.5	200	82.9667	nM		1	LY-PK
1	LY-PK	EPZ	25	0	90.7469	nM		1	LY-PK	LY-EZ	25	0	67.9439	nM		1	LY-PK	EPZ	25	0	74.7207	nM		1	LY-PK	LY-EZ	25	0	56.7335	nM		1	LY-PK	EPZ	25	0	91.8322	nM		1	LY-PK	LY-EZ	25	0	81.6912	nM		1	LY-PK
1	LY-PK	EPZ	25	12.5	86.9608	nM		1	LY-PK	LY-EZ	25	12.5	61.0119	nM		1	LY-PK	EPZ	25	12.5	73.4625	nM		1	LY-PK	LY-EZ	25	12.5	56.488	nM		1	LY-PK	EPZ	25	12.5	103.167	nM		1	LY-PK	LY-EZ	25	12.5	80.5997	nM		1	LY-PK
1	LY-PK	EPZ	25	25	75.0275	nM		1	LY-PK	LY-EZ	25	25	50.4138	nM		1	LY-PK	EPZ	25	25	71.7146	nM		1	LY-PK	LY-EZ	25	25	52.5302	nM		1	LY-PK	EPZ	25	25	101.527	nM		1	LY-PK	LY-EZ	25	25	81.845	nM		1	LY-PK
1	LY-PK	EPZ	25	50	69.3474	nM		1	LY-PK	LY-EZ	25	50	44.5587	nM		1	LY-PK	EPZ	25	50	68.8502	nM		1	LY-PK	LY-EZ	25	50	45.5101	nM		1	LY-PK	EPZ	25	50	97.8562	nM		1	LY-PK	LY-EZ	25	50	84.0302	nM		1	LY-PK
1	LY-PK	EPZ	25	100	65.581	nM		1	LY-PK	LY-EZ	25	100	42.4999	nM		1	LY-PK	EPZ	25	100	66.3019	nM		1	LY-PK	LY-EZ	25	100	48.6159	nM		1	LY-PK	EPZ	25	100	95.8531	nM		1	LY-PK	LY-EZ	25	100	81.0306	nM		1	LY-PK
1	LY-PK	EPZ	25	200	61.418	nM		1	LY-PK	LY-EZ	25	200	35.633	nM		1	LY-PK	EPZ	25	200	66.8827	nM		1	LY-PK	LY-EZ	25	200	47.5963	nM		1	LY-PK	EPZ	25	200	97.8991	nM		1	LY-PK	LY-EZ	25	200	85.207	nM		1	LY-PK
1	LY-PK	EPZ	50	0	78.2542	nM		1	LY-PK	LY-EZ	50	0	51.9608	nM		1	LY-PK	EPZ	50	0	65.3294	nM		1	LY-PK	LY-EZ	50	0	37.8785	nM		1	LY-PK	EPZ	50	0	87.1139	nM		1	LY-PK	LY-EZ	50	0	65.0938	nM		1	LY-PK
1	LY-PK	EPZ	50	12.5	74.6763	nM		1	LY-PK	LY-EZ	50	12.5	49.0266	nM		1	LY-PK	EPZ	50	12.5	62.1976	nM		1	LY-PK	LY-EZ	50	12.5	39.7596	nM		1	LY-PK	EPZ	50	12.5	85.0517	nM		1	LY-PK	LY-EZ	50	12.5	57.8553	nM		1	LY-PK
1	LY-PK	EPZ	50	25	61.8939	nM		1	LY-PK	LY-EZ	50	25	47.4427	nM		1	LY-PK	EPZ	50	25	64.8986	nM		1	LY-PK	LY-EZ	50	25	35.9982	nM		1	LY-PK	EPZ	50	25	90.811	nM		1	LY-PK	LY-EZ	50	25	59.6392	nM		1	LY-PK
1	LY-PK	EPZ	50	50	56.2957	nM		1	LY-PK	LY-EZ	50	50	44.2922	nM		1	LY-PK	EPZ	50	50	59.5231	nM		1	LY-PK	LY-EZ	50	50	31.5094	nM		1	LY-PK	EPZ	50	50	91.1355	nM		1	LY-PK	LY-EZ	50	50	58.3225	nM		1	LY-PK
1	LY-PK	EPZ	50	100	54.0911	nM		1	LY-PK	LY-EZ	50	100	44.1715	nM		1	LY-PK	EPZ	50	100	58.5958	nM		1	LY-PK	LY-EZ	50	100	34.1731	nM		1	LY-PK	EPZ	50	100	87.7691	nM		1	LY-PK	LY-EZ	50	100	50.8536	nM		1	LY-PK
1	LY-PK	EPZ	50	200	47.7805	nM		1	LY-PK	LY-EZ	50	200	29.4817	nM		1	LY-PK	EPZ	50	200	55.7642	nM		1	LY-PK	LY-EZ	50	200	30.7008	nM		1	LY-PK	EPZ	50	200	89.1359	nM		1	LY-PK	LY-EZ	50	200	54.3172	nM		1	LY-PK
1	LY-PK	EPZ	100	0	54.1161	nM		1	LY-PK	LY-EZ	100	0	48.7257	nM		1	LY-PK	EPZ	100	0	47.6517	nM		1	LY-PK	LY-EZ	100	0	24.0926	nM		1	LY-PK	EPZ	100	0	84.963	nM		1	LY-PK	LY-EZ	100	0	50.7961	nM		1	LY-PK
1	LY-PK	EPZ	100	12.5	51.2049	nM		1	LY-PK	LY-EZ	100	12.5	46.9192	nM		1	LY-PK	EPZ	100	12.5	44.3825	nM		1	LY-PK	LY-EZ	100	12.5	23.441	nM		1	LY-PK	EPZ	100	12.5	91.5556	nM		1	LY-PK	LY-EZ	100	12.5	53.6249	nM		1	LY-PK
1	LY-PK	EPZ	100	25	49.0188	nM		1	LY-PK	LY-EZ	100	25	46.8268	nM		1	LY-PK	EPZ	100	25	45.1155	nM		1	LY-PK	LY-EZ	100	25	25.5386	nM		1	LY-PK	EPZ	100	25	92.8514	nM		1	LY-PK	LY-EZ	100	25	56.0837	nM		1	LY-PK
1	LY-PK	EPZ	100	50	47.0984	nM		1	LY-PK	LY-EZ	100	50	50.3221	nM		1	LY-PK	EPZ	100	50	43.3897	nM		1	LY-PK	LY-EZ	100	50	20.8574	nM		1	LY-PK	EPZ	100	50	90.5865	nM		1	LY-PK	LY-EZ	100	50	53.6483	nM		1	LY-PK
1	LY-PK	EPZ	100	100	42.6782	nM		1	LY-PK	LY-EZ	100	100	41.6778	nM		1	LY-PK	EPZ	100	100	40.9192	nM		1	LY-PK	LY-EZ	100	100	20.2975	nM		1	LY-PK	EPZ	100	100	82.133	nM		1	LY-PK	LY-EZ	100	100	49.9068	nM		1	LY-PK
1	LY-PK	EPZ	100	200	34.6061	nM		1	LY-PK	LY-EZ	100	200	26.7802	nM		1	LY-PK	EPZ	100	200	40.539	nM		1	LY-PK	LY-EZ	100	200	23.4116	nM		1	LY-PK	EPZ	100	200	88.8453	nM		1	LY-PK	LY-EZ	100	200	50.1383	nM		1	LY-PK
1	LY-PK	EPZ	200	0	44.589	nM		1	LY-PK	LY-EZ	200	0	35.76	nM		1	LY-PK	EPZ	200	0	36.0649	nM		1	LY-PK	LY-EZ	200	0	19.2388	nM		1	LY-PK	EPZ	200	0	51.3489	nM		1	LY-PK	LY-EZ	200	0	44.4537	nM		1	LY-PK
1	LY-PK	EPZ	200	12.5	39.3108	nM		1	LY-PK	LY-EZ	200	12.5	33.5084	nM		1	LY-PK	EPZ	200	12.5	34.9131	nM		1	LY-PK	LY-EZ	200	12.5	23.3075	nM		1	LY-PK	EPZ	200	12.5	54.8869	nM		1	LY-PK	LY-EZ	200	12.5	47.1133	nM		1	LY-PK
1	LY-PK	EPZ	200	25	29.6114	nM		1	LY-PK	LY-EZ	200	25	27.5757	nM		1	LY-PK	EPZ	200	25	33.8686	nM		1	LY-PK	LY-EZ	200	25	21.2605	nM		1	LY-PK	EPZ	200	25	55.678	nM		1	LY-PK	LY-EZ	200	25	43.2229	nM		1	LY-PK
1	LY-PK	EPZ	200	50	23.6796	nM		1	LY-PK	LY-EZ	200	50	23.8413	nM		1	LY-PK	EPZ	200	50	35.4479	nM		1	LY-PK	LY-EZ	200	50	18.0934	nM		1	LY-PK	EPZ	200	50	51.6283	nM		1	LY-PK	LY-EZ	200	50	48.2662	nM		1	LY-PK
1	LY-PK	EPZ	200	100	22.1674	nM		1	LY-PK	LY-EZ	200	100	22.2989	nM		1	LY-PK	EPZ	200	100	34.0211	nM		1	LY-PK	LY-EZ	200	100	18.966	nM		1	LY-PK	EPZ	200	100	51.1961	nM		1	LY-PK	LY-EZ	200	100	48.4428	nM		1	LY-PK
1	LY-PK	EPZ	200	200	21.3334	nM		1	LY-PK	LY-EZ	200	200	17.4619	nM		1	LY-PK	EPZ	200	200	33.0825	nM		1	LY-PK	LY-EZ	200	200	18.3667	nM		1	LY-PK	EPZ	200	200	45.358	nM		1	LY-PK	LY-EZ	200	200	47.8053	nM		1	LY-PK
2	LY-PK	EPZ	0	0	100	nM		2	LY-PK	LY-EZ	0	0	100	nM		2	LY-PK	EPZ	0	0	100	nM		2	LY-PK	LY-EZ	0	0	100	nM		2	LY-PK	EPZ	0	0	100	nM		2	LY-PK	LY-EZ	0	0	100	nM		2	LY-PK
2	LY-PK	EPZ	0	12.5	97.8322	nM		2	LY-PK	LY-EZ	0	12.5	86.7315	nM		2	LY-PK	EPZ	0	12.5	78.1233	nM		2	LY-PK	LY-EZ	0	12.5	89.0471	nM		2	LY-PK	EPZ	0	12.5	99.9171	nM		2	LY-PK	LY-EZ	0	12.5	99.0294	nM		2	LY-PK
2	LY-PK	EPZ	0	25	93.0915	nM		2	LY-PK	LY-EZ	0	25	76.1298	nM		2	LY-PK	EPZ	0	25	78.2767	nM		2	LY-PK	LY-EZ	0	25	73.5173	nM		2	LY-PK	EPZ	0	25	93.9726	nM		2	LY-PK	LY-EZ	0	25	90.0948	nM		2	LY-PK
2	LY-PK	EPZ	0	50	86.6355	nM		2	LY-PK	LY-EZ	0	50	70.8942	nM		2	LY-PK	EPZ	0	50	77.3756	nM		2	LY-PK	LY-EZ	0	50	71.203	nM		2	LY-PK	EPZ	0	50	91.3344	nM		2	LY-PK	LY-EZ	0	50	96.3239	nM		2	LY-PK
2	LY-PK	EPZ	0	100	81.0557	nM		2	LY-PK	LY-EZ	0	100	64.3347	nM		2	LY-PK	EPZ	0	100	76.106	nM		2	LY-PK	LY-EZ	0	100	64.6474	nM		2	LY-PK	EPZ	0	100	85.1857	nM		2	LY-PK	LY-EZ	0	100	91.4567	nM		2	LY-PK
2	LY-PK	EPZ	0	200	79.3762	nM		2	LY-PK	LY-EZ	0	200	61.5972	nM		2	LY-PK	EPZ	0	200	73.5961	nM		2	LY-PK	LY-EZ	0	200	62.2792	nM		2	LY-PK	EPZ	0	200	84.9157	nM		2	LY-PK	LY-EZ	0	200	98.7705	nM		2	LY-PK
2	LY-PK	EPZ	12.5	0	97.7051	nM		2	LY-PK	LY-EZ	12.5	0	85.2848	nM		2	LY-PK	EPZ	12.5	0	83.9989	nM		2	LY-PK	LY-EZ	12.5	0	68.9563	nM		2	LY-PK	EPZ	12.5	0	99.4607	nM		2	LY-PK	LY-EZ	12.5	0	91.7757	nM		2	LY-PK
2	LY-PK	EPZ	12.5	12.5	95.7027	nM		2	LY-PK	LY-EZ	12.5	12.5	80.2981	nM		2	LY-PK	EPZ	12.5	12.5	79.766	nM		2	LY-PK	LY-EZ	12.5	12.5	65.7134	nM		2	LY-PK	EPZ	12.5	12.5	100.686	nM		2	LY-PK	LY-EZ	12.5	12.5	88.5494	nM		2	LY-PK
2	LY-PK	EPZ	12.5	25	89.4991	nM		2	LY-PK	LY-EZ	12.5	25	76.5645	nM		2	LY-PK	EPZ	12.5	25	75.89	nM		2	LY-PK	LY-EZ	12.5	25	61.3243	nM		2	LY-PK	EPZ	12.5	25	95.9924	nM		2	LY-PK	LY-EZ	12.5	25	88.6218	nM		2	LY-PK
2	LY-PK	EPZ	12.5	50	87.2238	nM		2	LY-PK	LY-EZ	12.5	50	66.779	nM		2	LY-PK	EPZ	12.5	50	72.2918	nM		2	LY-PK	LY-EZ	12.5	50	61.0623	nM		2	LY-PK	EPZ	12.5	50	85.1739	nM		2	LY-PK	LY-EZ	12.5	50	88.3368	nM		2	LY-PK
2	LY-PK	EPZ	12.5	100	80.1407	nM		2	LY-PK	LY-EZ	12.5	100	63.9488	nM		2	LY-PK	EPZ	12.5	100	68.2752	nM		2	LY-PK	LY-EZ	12.5	100	60.1678	nM		2	LY-PK	EPZ	12.5	100	84.7825	nM		2	LY-PK	LY-EZ	12.5	100	88.9885	nM		2	LY-PK
2	LY-PK	EPZ	12.5	200	75.7101	nM		2	LY-PK	LY-EZ	12.5	200	56.1856	nM		2	LY-PK	EPZ	12.5	200	68.1192	nM		2	LY-PK	LY-EZ	12.5	200	49.8121	nM		2	LY-PK	EPZ	12.5	200	80.2111	nM		2	LY-PK	LY-EZ	12.5	200	90.0439	nM		2	LY-PK
2	LY-PK	EPZ	25	0	92.1661	nM		2	LY-PK	LY-EZ	25	0	77.4054	nM		2	LY-PK	EPZ	25	0	79.6598	nM		2	LY-PK	LY-EZ	25	0	58.2762	nM		2	LY-PK	EPZ	25	0	93.0871	nM		2	LY-PK	LY-EZ	25	0	84.029	nM		2	LY-PK
2	LY-PK	EPZ	25	12.5	86.3359	nM		2	LY-PK	LY-EZ	25	12.5	71.0307	nM		2	LY-PK	EPZ	25	12.5	76.6668	nM		2	LY-PK	LY-EZ	25	12.5	53.3972	nM		2	LY-PK	EPZ	25	12.5	94.5268	nM		2	LY-PK	LY-EZ	25	12.5	85.297	nM		2	LY-PK
2	LY-PK	EPZ	25	25	82.0336	nM		2	LY-PK	LY-EZ	25	25	65.3412	nM		2	LY-PK	EPZ	25	25	73.1736	nM		2	LY-PK	LY-EZ	25	25	52.9783	nM		2	LY-PK	EPZ	25	25	92.8851	nM		2	LY-PK	LY-EZ	25	25	84.4095	nM		2	LY-PK
2	LY-PK	EPZ	25	50	79.7078	nM		2	LY-PK	LY-EZ	25	50	56.3851	nM		2	LY-PK	EPZ	25	50	70.8122	nM		2	LY-PK	LY-EZ	25	50	51.406	nM		2	LY-PK	EPZ	25	50	92.0632	nM		2	LY-PK	LY-EZ	25	50	83.9473	nM		2	LY-PK
2	LY-PK	EPZ	25	100	74.0389	nM		2	LY-PK	LY-EZ	25	100	52.6658	nM		2	LY-PK	EPZ	25	100	66.3465	nM		2	LY-PK	LY-EZ	25	100	48.4277	nM		2	LY-PK	EPZ	25	100	91.4476	nM		2	LY-PK	LY-EZ	25	100	83.9704	nM		2	LY-PK
2	LY-PK	EPZ	25	200	69.0987	nM		2	LY-PK	LY-EZ	25	200	49.9496	nM		2	LY-PK	EPZ	25	200	63.1307	nM		2	LY-PK	LY-EZ	25	200	40.9857	nM		2	LY-PK	EPZ	25	200	88.2649	nM		2	LY-PK	LY-EZ	25	200	83.2263	nM		2	LY-PK
2	LY-PK	EPZ	50	0	90.3962	nM		2	LY-PK	LY-EZ	50	0	68.338	nM		2	LY-PK	EPZ	50	0	66.0977	nM		2	LY-PK	LY-EZ	50	0	39.0458	nM		2	LY-PK	EPZ	50	0	101.542	nM		2	LY-PK	LY-EZ	50	0	70.1625	nM		2	LY-PK
2	LY-PK	EPZ	50	12.5	86.3588	nM		2	LY-PK	LY-EZ	50	12.5	61.5637	nM		2	LY-PK	EPZ	50	12.5	61.9647	nM		2	LY-PK	LY-EZ	50	12.5	38.406	nM		2	LY-PK	EPZ	50	12.5	100.143	nM		2	LY-PK	LY-EZ	50	12.5	68.3491	nM		2	LY-PK
2	LY-PK	EPZ	50	25	82.2319	nM		2	LY-PK	LY-EZ	50	25	59.4768	nM		2	LY-PK	EPZ	50	25	57.0418	nM		2	LY-PK	LY-EZ	50	25	37.0986	nM		2	LY-PK	EPZ	50	25	92.2407	nM		2	LY-PK	LY-EZ	50	25	67.5587	nM		2	LY-PK
2	LY-PK	EPZ	50	50	74.7114	nM		2	LY-PK	LY-EZ	50	50	52.1883	nM		2	LY-PK	EPZ	50	50	55.0531	nM		2	LY-PK	LY-EZ	50	50	36.3769	nM		2	LY-PK	EPZ	50	50	96.0663	nM		2	LY-PK	LY-EZ	50	50	67.9378	nM		2	LY-PK
2	LY-PK	EPZ	50	100	70.4486	nM		2	LY-PK	LY-EZ	50	100	45.7286	nM		2	LY-PK	EPZ	50	100	53.823	nM		2	LY-PK	LY-EZ	50	100	35.4664	nM		2	LY-PK	EPZ	50	100	94.7938	nM		2	LY-PK	LY-EZ	50	100	66.528	nM		2	LY-PK
2	LY-PK	EPZ	50	200	64.3384	nM		2	LY-PK	LY-EZ	50	200	42.4823	nM		2	LY-PK	EPZ	50	200	53.4417	nM		2	LY-PK	LY-EZ	50	200	34.141	nM		2	LY-PK	EPZ	50	200	95.2873	nM		2	LY-PK	LY-EZ	50	200	66.3816	nM		2	LY-PK
2	LY-PK	EPZ	100	0	72.4727	nM		2	LY-PK	LY-EZ	100	0	57.635	nM		2	LY-PK	EPZ	100	0	56.2191	nM		2	LY-PK	LY-EZ	100	0	27.4716	nM		2	LY-PK	EPZ	100	0	94.4691	nM		2	LY-PK	LY-EZ	100	0	50.0085	nM		2	LY-PK
2	LY-PK	EPZ	100	12.5	65.2996	nM		2	LY-PK	LY-EZ	100	12.5	53.1405	nM		2	LY-PK	EPZ	100	12.5	55.0516	nM		2	LY-PK	LY-EZ	100	12.5	26.8731	nM		2	LY-PK	EPZ	100	12.5	91.3581	nM		2	LY-PK	LY-EZ	100	12.5	50.7634	nM		2	LY-PK
2	LY-PK	EPZ	100	25	59.007	nM		2	LY-PK	LY-EZ	100	25	48.0852	nM		2	LY-PK	EPZ	100	25	53.921	nM		2	LY-PK	LY-EZ	100	25	25.1168	nM		2	LY-PK	EPZ	100	25	93.5302	nM		2	LY-PK	LY-EZ	100	25	53.4874	nM		2	LY-PK
2	LY-PK	EPZ	100	50	54.9846	nM		2	LY-PK	LY-EZ	100	50	40.3483	nM		2	LY-PK	EPZ	100	50	52.6932	nM		2	LY-PK	LY-EZ	100	50	23.8237	nM		2	LY-PK	EPZ	100	50	92.2348	nM		2	LY-PK	LY-EZ	100	50	53.0961	nM		2	LY-PK
2	LY-PK	EPZ	100	100	51.6901	nM		2	LY-PK	LY-EZ	100	100	33.7954	nM		2	LY-PK	EPZ	100	100	52.1374	nM		2	LY-PK	LY-EZ	100	100	22.9795	nM		2	LY-PK	EPZ	100	100	93.5361	nM		2	LY-PK	LY-EZ	100	100	50.4183	nM		2	LY-PK
2	LY-PK	EPZ	100	200	46.6516	nM		2	LY-PK	LY-EZ	100	200	30.4834	nM		2	LY-PK	EPZ	100	200	51.7669	nM		2	LY-PK	LY-EZ	100	200	22.7167	nM		2	LY-PK	EPZ	100	200	88.0333	nM		2	LY-PK	LY-EZ	100	200	49.9653	nM		2	LY-PK
2	LY-PK	EPZ	200	0	52.9393	nM		2	LY-PK	LY-EZ	200	0	45.5954	nM		2	LY-PK	EPZ	200	0	48.6819	nM		2	LY-PK	LY-EZ	200	0	21.87	nM		2	LY-PK	EPZ	200	0	86.3332	nM		2	LY-PK	LY-EZ	200	0	45.0073	nM		2	LY-PK
2	LY-PK	EPZ	200	12.5	48.1119	nM		2	LY-PK	LY-EZ	200	12.5	41.1163	nM		2	LY-PK	EPZ	200	12.5	46.691	nM		2	LY-PK	LY-EZ	200	12.5	21.2336	nM		2	LY-PK	EPZ	200	12.5	80.405	nM		2	LY-PK	LY-EZ	200	12.5	42.9505	nM		2	LY-PK
2	LY-PK	EPZ	200	25	45.3995	nM		2	LY-PK	LY-EZ	200	25	33.8859	nM		2	LY-PK	EPZ	200	25	45.8461	nM		2	LY-PK	LY-EZ	200	25	21.0595	nM		2	LY-PK	EPZ	200	25	85.95	nM		2	LY-PK	LY-EZ	200	25	41.9505	nM		2	LY-PK
2	LY-PK	EPZ	200	50	38.9444	nM		2	LY-PK	LY-EZ	200	50	28.932	nM		2	LY-PK	EPZ	200	50	43.8777	nM		2	LY-PK	LY-EZ	200	50	20.5122	nM		2	LY-PK	EPZ	200	50	80.6499	nM		2	LY-PK	LY-EZ	200	50	43.0275	nM		2	LY-PK
2	LY-PK	EPZ	200	100	35.5799	nM		2	LY-PK	LY-EZ	200	100	25.1354	nM		2	LY-PK	EPZ	200	100	41.2981	nM		2	LY-PK	LY-EZ	200	100	19.4923	nM		2	LY-PK	EPZ	200	100	76.3404	nM		2	LY-PK	LY-EZ	200	100	41.1216	nM		2	LY-PK
2	LY-PK	EPZ	200	200	34.9308	nM		2	LY-PK	LY-EZ	200	200	18.8172	nM		2	LY-PK	EPZ	200	200	40.8817	nM		2	LY-PK	LY-EZ	200	200	18.2518	nM		2	LY-PK	EPZ	200	200	76.2864	nM		2	LY-PK	LY-EZ	200	200	44.3864	nM		2	LY-PK
3	LY-PK	EPZ	0	0	100	nM		3	LY-PK	LY-EZ	0	0	100	nM		3	LY-PK	EPZ	0	0	100	nM		3	LY-PK	LY-EZ	0	0	100	nM		3	LY-PK	EPZ	0	0	100	nM		3	LY-PK	LY-EZ	0	0	100	nM		3	LY-PK
3	LY-PK	EPZ	0	12.5	95.5859	nM		3	LY-PK	LY-EZ	0	12.5	83.5417	nM		3	LY-PK	EPZ	0	12.5	98.4688	nM		3	LY-PK	LY-EZ	0	12.5	102.042	nM		3	LY-PK	EPZ	0	12.5	99.32	nM		3	LY-PK	LY-EZ	0	12.5	96.3746	nM		3	LY-PK
3	LY-PK	EPZ	0	25	90.4509	nM		3	LY-PK	LY-EZ	0	25	83.942	nM		3	LY-PK	EPZ	0	25	98.9011	nM		3	LY-PK	LY-EZ	0	25	100.617	nM		3	LY-PK	EPZ	0	25	101.164	nM		3	LY-PK	LY-EZ	0	25	96.8894	nM		3	LY-PK
3	LY-PK	EPZ	0	50	82.8005	nM		3	LY-PK	LY-EZ	0	50	80.128	nM		3	LY-PK	EPZ	0	50	92.1701	nM		3	LY-PK	LY-EZ	0	50	98.1407	nM		3	LY-PK	EPZ	0	50	95.088	nM		3	LY-PK	LY-EZ	0	50	92.607	nM		3	LY-PK
3	LY-PK	EPZ	0	100	81.3629	nM		3	LY-PK	LY-EZ	0	100	79.6631	nM		3	LY-PK	EPZ	0	100	82.8228	nM		3	LY-PK	LY-EZ	0	100	93.0875	nM		3	LY-PK	EPZ	0	100	87.803	nM		3	LY-PK	LY-EZ	0	100	89.4412	nM		3	LY-PK
3	LY-PK	EPZ	0	200	71.508	nM		3	LY-PK	LY-EZ	0	200	64.5392	nM		3	LY-PK	EPZ	0	200	78.252	nM		3	LY-PK	LY-EZ	0	200	77.8235	nM		3	LY-PK	EPZ	0	200	91.4165	nM		3	LY-PK	LY-EZ	0	200	86.5641	nM		3	LY-PK
3	LY-PK	EPZ	12.5	0	94.8409	nM		3	LY-PK	LY-EZ	12.5	0	86.7981	nM		3	LY-PK	EPZ	12.5	0	95.318	nM		3	LY-PK	LY-EZ	12.5	0	80.6639	nM		3	LY-PK	EPZ	12.5	0	102.539	nM		3	LY-PK	LY-EZ	12.5	0	99.1328	nM		3	LY-PK
3	LY-PK	EPZ	12.5	12.5	92.2928	nM		3	LY-PK	LY-EZ	12.5	12.5	82.4606	nM		3	LY-PK	EPZ	12.5	12.5	82.4021	nM		3	LY-PK	LY-EZ	12.5	12.5	80.9865	nM		3	LY-PK	EPZ	12.5	12.5	105.398	nM		3	LY-PK	LY-EZ	12.5	12.5	99.9144	nM		3	LY-PK
3	LY-PK	EPZ	12.5	25	92.5444	nM		3	LY-PK	LY-EZ	12.5	25	74.9685	nM		3	LY-PK	EPZ	12.5	25	80.6788	nM		3	LY-PK	LY-EZ	12.5	25	86.7259	nM		3	LY-PK	EPZ	12.5	25	100.739	nM		3	LY-PK	LY-EZ	12.5	25	96.4485	nM		3	LY-PK
3	LY-PK	EPZ	12.5	50	82.8191	nM		3	LY-PK	LY-EZ	12.5	50	66.8238	nM		3	LY-PK	EPZ	12.5	50	76.5133	nM		3	LY-PK	LY-EZ	12.5	50	83.9958	nM		3	LY-PK	EPZ	12.5	50	94.566	nM		3	LY-PK	LY-EZ	12.5	50	94.5517	nM		3	LY-PK
3	LY-PK	EPZ	12.5	100	81.4575	nM		3	LY-PK	LY-EZ	12.5	100	55.5577	nM		3	LY-PK	EPZ	12.5	100	73.2855	nM		3	LY-PK	LY-EZ	12.5	100	80.3131	nM		3	LY-PK	EPZ	12.5	100	99.2065	nM		3	LY-PK	LY-EZ	12.5	100	90.1446	nM		3	LY-PK
[truncated: 25 more rows]
[truncated: 12 more columns]
